# Supplementary material for: Hospital staff, volunteers’ and patients’ perceptions of barriers and facilitators to communication following stroke in an acute and a rehabilitation private hospital ward: a qualitative description study
Source: PubMed Central journal article supplement — BMJ Open. 2021 May 5;11(5):e043897. doi: 10.1136/bmjopen-2020-043897 (PMC8103362; doi:10.1136/bmjopen-2020-043897), 2021-05-05
Supplement: bmjopen-2020-043897.draft_revisions.pdf [file bmjopen-2020-043897.draft_revisions.pdf]

# BMJ Open

BMJ Open is committed to open peer review. As part of this commitment we make the peer review history of every article we publish publicly available.

When an article is published we post the peer reviewers' comments and the authors' responses online. We also post the versions of the paper that were used during peer review. These are the versions that the peer review comments apply to.

The versions of the paper that follow are the versions that were submitted during the peer review process. They are not the versions of record or the final published versions. They should not be cited or distributed as the published version of this manuscript.

BMJ Open is an open access journal and the full, final, typeset and author-corrected version of record of the manuscript is available on our site with no access controls, subscription charges or pay-per-view fees (<http://bmjopen.bmj.com>).

If you have any questions on BMJ Open's open peer review process please email [info.bmjopen@bmj.com](mailto:info.bmjopen@bmj.com)

# BMJ Open

## Hospital staff and stroke patient perceptions of barriers and facilitators to communication on acute and rehabilitation hospital wards.

|                               |                                                                                                                                                                                                                                                                                                                                                                                                                                                                                                                                                                                          |
|-------------------------------|------------------------------------------------------------------------------------------------------------------------------------------------------------------------------------------------------------------------------------------------------------------------------------------------------------------------------------------------------------------------------------------------------------------------------------------------------------------------------------------------------------------------------------------------------------------------------------------|
| Journal:                      | <i>BMJ Open</i>                                                                                                                                                                                                                                                                                                                                                                                                                                                                                                                                                                          |
| Manuscript ID                 | bmjopen-2020-043897                                                                                                                                                                                                                                                                                                                                                                                                                                                                                                                                                                      |
| Article Type:                 | Original research                                                                                                                                                                                                                                                                                                                                                                                                                                                                                                                                                                        |
| Date Submitted by the Author: | 19-Aug-2020                                                                                                                                                                                                                                                                                                                                                                                                                                                                                                                                                                              |
| Complete List of Authors:     | D'Souza, Sarah; Edith Cowan University, School of Medical and Health Sciences<br>Godecke, Erin; Edith Cowan University, School of Medical and Health Sciences; La Trobe University, Centre for Aphasia Recovery and Rehabilitation Research<br>Ciccione, Natalie; Edith Cowan University, School of Medical and Health Sciences<br>Hersh, Deborah; Edith Cowan University, School of Medical and Health Sciences<br>Janssen, Heidi; The University of Newcastle Hunter Medical Research Institute<br>Armstrong, Elizabeth; Edith Cowan University, School of Medical and Health Sciences |
| Keywords:                     | Stroke < NEUROLOGY, Adult neurology < NEUROLOGY, QUALITATIVE RESEARCH                                                                                                                                                                                                                                                                                                                                                                                                                                                                                                                    |
|                               |                                                                                                                                                                                                                                                                                                                                                                                                                                                                                                                                                                                          |

SCHOLARONE™  
Manuscripts

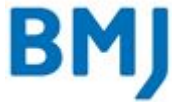

I, the Submitting Author has the right to grant and does grant on behalf of all authors of the Work (as defined in the below author licence), an exclusive licence and/or a non-exclusive licence for contributions from authors who are: i) UK Crown employees; ii) where BMJ has agreed a CC-BY licence shall apply, and/or iii) in accordance with the terms applicable for US Federal Government officers or employees acting as part of their official duties; on a worldwide, perpetual, irrevocable, royalty-free basis to BMJ Publishing Group Ltd ("BMJ") its licensees and where the relevant Journal is co-owned by BMJ to the co-owners of the Journal, to publish the Work in this journal and any other BMJ products and to exploit all rights, as set out in our [licence](#).

The Submitting Author accepts and understands that any supply made under these terms is made by BMJ to the Submitting Author unless you are acting as an employee on behalf of your employer or a postgraduate student of an affiliated institution which is paying any applicable article publishing charge ("APC") for Open Access articles. Where the Submitting Author wishes to make the Work available on an Open Access basis (and intends to pay the relevant APC), the terms of reuse of such Open Access shall be governed by a Creative Commons licence – details of these licences and which [Creative Commons](#) licence will apply to this Work are set out in our licence referred to above.

Other than as permitted in any relevant BMJ Author's Self Archiving Policies, I confirm this Work has not been accepted for publication elsewhere, is not being considered for publication elsewhere and does not duplicate material already published. I confirm all authors consent to publication of this Work and authorise the granting of this licence.

**Title page****Title**

Hospital staff and stroke patient perceptions of barriers and facilitators to communication on acute and rehabilitation hospital wards.

**Authors**

Sarah D'Souza<sup>1</sup>, Erin Godecke<sup>1</sup>, Natalie Ciccone<sup>1</sup>, Deborah Hersh<sup>1</sup>, Heidi Janssen<sup>2,3</sup>, Elizabeth Armstrong<sup>1</sup>

**Affiliations**

1. Edith Cowan University, Perth, Western Australia, Australia
2. Hunter New England Local Health District, NSW Health, New South Wales, Australia
3. La Trobe University, Centre for Aphasia Recovery and Rehabilitation Research  
Melbourne, Victoria, Australia

**Addresses of all authors**

Sarah D'Souza

School of Medical and Health Sciences, Edith Cowan University  
270 Joondalup Drive, Joondalup 6027, Australia  
s.dsouza@ecu.edu.au

Associate Professor Erin Godecke

School of Medical and Health Sciences, Edith Cowan University  
270 Joondalup Drive, Joondalup, WA 6027, Australia.  
e.godecke@ecu.edu.au

Associate Professor Natalie Ciccone

School of Medical and Health Sciences, Edith Cowan University  
270 Joondalup Drive, Joondalup 6027, Australia

1  
2  
3 n.ciccione@ecu.edu.au  
4

5 Associate Professor Deborah Hersh  
6

7 School of Medical and Health Sciences, Edith Cowan University  
8

9 270 Joondalup Drive, Joondalup, WA 6027, Australia  
10

11 d.hersh@ecu.edu.au  
12

13  
14  
15 Dr Heidi Janssen  
16

17 Hunter Medical Research Institute  
18

19 Lot 1, Kookaburra Circuit, New Lambton Heights NSW 2305  
20

21 Heidi.Janssen@health.nsw.gov.au  
22

23  
24  
25 Professor Elizabeth Armstrong  
26

27 School of Medical and Health Sciences, Edith Cowan University  
28

29 270 Joondalup Drive, Joondalup, WA 6027, Australia  
30

31 b.armstrong@ecu.edu.au  
32  
33  
34  
35  
36

37 **Key words:** stroke, adult neurology, qualitative research  
38

39  
40 **Competing interests statement:** This research was funded by The Hollywood Private  
41 Hospital Research Grant (RF087). SD received an Australian Post Graduate Award  
42 Scholarship for the first year of this study, and received an ECU Research Travel Grant. The  
43 authors have no other competing interests to declare.  
44  
45  
46  
47

48 **Author contributions:** All authors designed the study and the protocol. EG reviewed the  
49 final copies of the protocol documents. SD conducted the semi-structured interviews and  
50 focus groups. SD performed data analysis. DH conducted the critical review of the categories  
51 and review of themes. All authors contributed to the manuscript and approved the  
52 manuscript.  
53  
54  
55  
56  
57

58 **Reporting guidelines checklist:** The consolidated criteria for reporting qualitative studies  
59 (COREQ)<sup>21</sup> was used to guide reporting this study.  
60

1  
2  
3 **Funding statement:** This work was supported by the Hollywood Private Hospital Research  
4 Foundation grant number RF087. SD received an Australian Post Graduate Award  
5 Scholarship for the first year of this study, and received an ECU Research Travel Grant.  
6  
7

8  
9 **Corresponding author:** Sarah D'Souza is the corresponding author, s.dsouza@ecu.edu.au  
10  
11

12  
13  
14 The Corresponding Author has the right to grant on behalf of all authors and does grant on  
15 behalf of all authors, an exclusive licence (or non-exclusive for government employees) on a  
16 worldwide basis to the BMJ Publishing Group Ltd to permit this article (if accepted) to be  
17 published in BMJ editions and any other BMJPG products and sublicences such use and  
18 exploit all subsidiary rights, as set out in our licence.  
19  
20  
21  
22

23  
24  
25  
26 All authors have completed the [Unified Competing Interest form](#)) and declare: This research  
27 was funded by The Hollywood Private Hospital Research Grant (RF087). SD received an  
28 Australian Post Graduate Award Scholarship for the first year of this study, and received an  
29 ECU Research Travel Grant. No other support from any organisation for the submitted work;  
30 no financial relationships with any organisations that might have an interest in the  
31 submitted work in the previous three years, no other relationships or activities that could  
32 appear to have influenced the submitted work.  
33  
34  
35  
36  
37  
38  
39

40  
41 The lead author (the manuscript's guarantor) affirms that the manuscript is an honest,  
42 accurate, and transparent account of the study being reported; that no important aspects of  
43 the study have been omitted; and that any discrepancies from the study as planned have  
44 been explained.  
45  
46  
47  
48  
49

50  
51 This study has Ethics approval from the Edith Cowan University Human Research Ethics  
52 Committee (ECU HREC 12149) and The Hollywood Private Hospital Research Ethics  
53 Committee (HPH431).  
54  
55  
56  
57  
58  
59  
60

## Abstract

**Objectives:** To explore hospital staff, volunteer and stroke survivor perceived barriers and facilitators to stroke survivor communication in an acute and a rehabilitation ward setting.

**Design:** A qualitative descriptive sub-study within a larger study which aimed to develop and test a Communication Enhanced Environment in an acute and a rehabilitation ward.

**Setting:** A metropolitan Australian private hospital.

**Participants:** Acute and rehabilitation doctors, nurses, allied health staff and volunteers were purposively recruited. Seven stroke inpatients, including three with aphasia, were consecutively recruited.

**Results:** Hospital staff and volunteer focus groups and interviews, and patient interviews were conducted. The key themes related to barriers and facilitators to communication, contained sub-categories related to hospital, staff and patient factors. Hospital related barriers to communication were private rooms, mixed wards, the physical hospital environment, hospital policies, the power imbalance between staff and patients, and task specific communication. Staff related barriers to communication were staff's perception of time pressures, underutilisation of available resources, staff individual factors such as personality, role perception and lack of knowledge and skills regarding communication strategies. The patient related barrier to communication involved patients' functional and medical status. Hospital related facilitators to communication were shared rooms/co-location of patients, visitors and volunteers. Staff related facilitators to communication were utilisation of resources, speech pathology support, staff knowledge and utilisation of communication strategies and individual staff factors such as personality.

**Conclusions:** Barriers and facilitators to communication appeared to be interconnected and likely to influence one another suggesting that the level of communication access may vary from patient to patient within the same setting.

### Study strengths

- This study involved a large number of staff in comparison to previous studies<sup>12, 13</sup> and included volunteers working within the acute and rehabilitation wards as well stroke in-patients.
- Data saturation was reached within the staff focus groups.

### Study limitations

- Small numbers of medical (n=2) and nursing staff (n= 11) were recruited compared to allied health staff (N= 32) which may be reflected in the results.
- This study involved a small number of stroke participants; a broader range of perspectives may have been expressed with a larger number of participants.
- This study was conducted at a private hospital involving a mixed acute and a mixed rehabilitation ward. These results reflect this context and may not be directly generalisable to hospitals in the public sector.



## Background

Stroke survivors in hospital spend on average 65-94% of their day inactive.<sup>1</sup> Despite improvements in functional independence during their hospital admission, stroke survivors' engagement in cognitive and social activity remains largely unchanged.<sup>2</sup> Stroke survivors with aphasia spend two thirds less time engaged in social interactions with family and friends compared to stroke survivors without aphasia.<sup>3</sup>

Stroke survivors have described time outside therapy as "dead" and "wasted", reporting a lack of stimulation and inactivity in hospital impacting their ability to self-direct their rehabilitation outside of therapy.<sup>4</sup> A lack of social and cognitive activity early after stroke for stroke patients with aphasia has the potential to contribute to: i) the development of maladaptive compensatory communication behaviours, and ii) the learned non-use of language, which may ultimately impact on their quality of life and overall language recovery.<sup>3</sup>

This study aimed to explore hospital staff and volunteer, and stroke patient perceptions of barriers and facilitators to stroke patient communication in an acute and a rehabilitation hospital ward. Identifying barriers and facilitators to stroke inpatient communication will inform the development of a Communication Enhanced Environment (CEE) for the purposes of increasing stroke survivor engagement in language activity within a hospital ward to maximise post-stroke aphasia language recovery.

## Methods

### Design

This was a sub-study of a larger study which aimed to develop and test a CEE within an acute and a rehabilitation ward (see supplementary file for study protocol and procedure). This sub-study contributed to the baseline phase of the larger study outlined below:

- i) *Baseline phase:* observe and quantify stroke patients' engagement in language activity in the acute and rehabilitation ward environments and explore hospital staff and volunteer, and stroke patients' perceptions of barriers and facilitators to communication in hospital;
- ii) *Implementation phase:* develop and implement the CEE on the acute and rehabilitation wards;

- 1  
2  
3 *iii) Post-implementation phase: assess the impact of the CEE on stroke patient*  
4 *engagement in language activity, and hospital staff and patients' perceptions of*  
5 *barriers to communication in hospital.*  
6  
7

### 8 **Research authors' relationship with participants**

9  
10 The first author who was external to the hospital conducted focus groups and  
11 interviews. The first author engaged key hospital team members for the duration of the  
12 study to inform the study design to ensure it aligned with the hospital policies and priorities.  
13  
14

### 15 **Public and patient involvement**

16  
17 The public and patients were not involved in the design of this study however this  
18 data informed the development of the CEE model in the larger study. A working group  
19 consisting of key members of the stroke multidisciplinary team provided feedback on this  
20 study's findings and were involved in the development of the CEE model and embedding  
21 approach, which was based on the outcomes of this sub-study. Dissemination of the final  
22 results of this sub-study will be provided on completion of the larger study.  
23  
24  
25  
26  
27  
28

### 29 **Setting**

30  
31 This study was conducted on an acute and a rehabilitation ward at a private hospital  
32 in Perth, Western Australia. The acute ward was a 26- bed unit with acute stroke and  
33 medical patients. The acute ward had four individual rooms and nine shared rooms, two  
34 rooms with four beds per room, and seven rooms with two beds per room. Patients ate  
35 meals in their rooms and had access to an outdoor balcony area. The rehabilitation ward  
36 was a 44-bed mixed rehabilitation unit for medical, orthopaedic, post-surgical and stroke  
37 patients. There were thirty-six individual rooms, and four shared rooms with two beds in  
38 each room. Patients had breakfast in their rooms but were encouraged to eat lunch and  
39 dinner in one of two communal dining areas.  
40  
41  
42  
43  
44  
45  
46

### 47 **Participants**

48  
49 *Hospital staff participants:* Purposeful sampling of acute and rehabilitation hospital  
50 staff was conducted to include at least one representative from each acute and  
51 rehabilitation staff group including medical, nursing, volunteers, and allied health staff  
52 members who were over 18 years of age. A total of 51 staff and volunteers were recruited  
53 (Table 1.) by contacting staff department managers who identified staff currently working or  
54 had previously worked with stroke patients on the acute or rehabilitation wards.  
55  
56  
57  
58  
59  
60

Table 1. Staff participants

| Staff/volunteer groups       |   |                                       |   |                |   |
|------------------------------|---|---------------------------------------|---|----------------|---|
| Medical & Nursing            | N | Allied Health                         | N | Volunteer      | N |
| Acute nurses (AN)            | 2 | Dietitian (DT)                        | 1 | Volunteers (V) | 6 |
| Clinical nurse manager (CNM) | 1 | Occupational therapy manager (OTM)    | 1 |                |   |
| Medical consultants (MC)     | 2 | Occupational therapists (OT)          | 5 |                |   |
| Rehabilitation nurses (RN)   | 8 | Occupational therapy assistants (OTA) | 3 |                |   |
|                              |   | Physiotherapists (PT)                 | 8 |                |   |
|                              |   | Physiotherapy assistants (PTA)        | 2 |                |   |
|                              |   | Social workers (SW)                   | 5 |                |   |
|                              |   | Speech pathology manager (SPM)        | 1 |                |   |
|                              |   | Speech pathologists (SP)              | 4 |                |   |
|                              |   | Speech pathology assistant (SPA)      | 1 |                |   |
|                              |   | Volunteer manager (VM)                | 1 |                |   |

1  
2  
3  
4  
5  
6  
7  
8  
9  
10  
11  
12  
13  
14  
15  
16  
17  
18  
19  
20  
21  
22  
23  
24  
25  
26  
27  
28  
29  
30  
31  
32  
33  
34  
35  
36  
37  
38  
39  
40  
41  
42  
43  
44  
45  
46  
47  
48  
49  
50  
51  
52  
53  
54  
55  
56  
57  
58  
59  
60

*Stroke patient participants:* All consecutively admitted stroke patients from January to February 2016, and June 2016 to July 2017 were screened for eligibility to participate in the study. Inclusion criteria: i) admitted to the acute or rehabilitation ward with an acute stroke, ii) less than 21 days post-stroke during data collection, iii) able to provide informed consent based on the judgement of the medical team responsible for the medical management of the patient, iv) Glasgow Coma Scale<sup>6</sup> greater than 10, v) estimated total length of hospital stay greater than 14 days, vi) adequate English proficiency to participate in interviews as determined by managing speech pathologist or medical team. Exclusion criteria: i) uncorrected hearing or vision (for example hearing impairment without the use of hearing aids or vision impairment without the use of glasses), ii) medically unstable, iii) documented diagnosis of current untreated depression, documented diagnosis of dementia, previous aphasia or traumatic brain injury. The diagnosis of aphasia was confirmed for those who achieved a Western Aphasia Battery-Revised<sup>7</sup> Aphasia Quotient score less than 93.7. A total of 9 stroke participants were recruited, however 2 stroke participants were withdrawn as they became medically unwell. Data collection was completed for 4 stroke patients without aphasia and 3 stroke patients with aphasia. See Figure 1. for the summary of stroke participant screening and recruitment. Stroke participant details and demographics are detailed in Table 2.

No staff or stroke participants withdrew from participating in this study.

### **Data collection**

The first author, a female speech pathologist (Bachelor of Speech Pathology, First Class Honours) and PhD student with seven years clinical experience working in the hospital setting and five years research experience, including conducting interviews and focus groups, completed all semi-structured interviews and focus groups. Staff were informed that the researchers wanted to investigate their perceptions of the hospital ward environment in regards to communication opportunities to inform the development of a Communication Enhanced Environment (see supplementary file for staff and volunteer information and consent forms). Stroke patients were informed that the researchers wanted to explore how the hospital environment influenced patient activity (see supplementary file for stroke patient information and consent forms).

All interviews and focus groups were conducted using interview and focus group guides (staff focus groups and interview guide Appendix A., patient interview guide

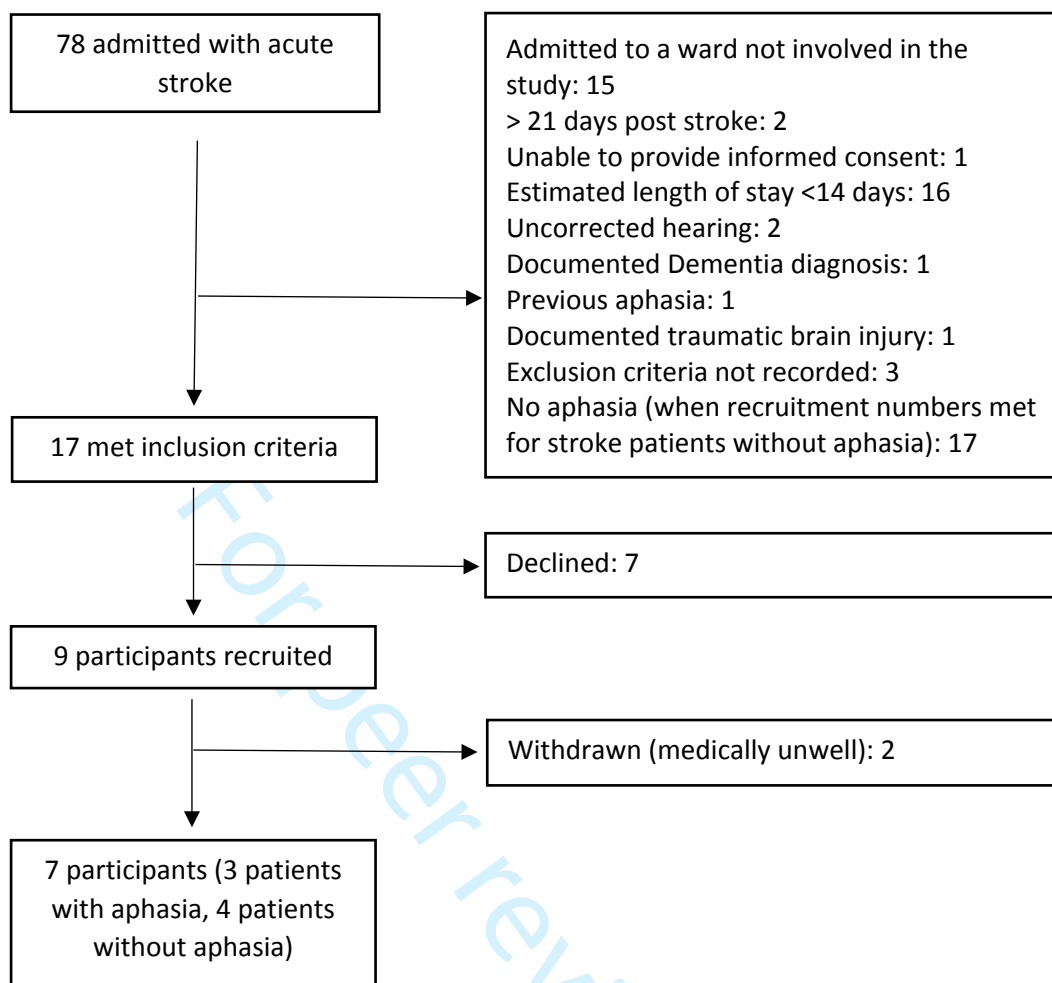

Figure 1. Summary of stroke participant screening and recruitment

Table 2. Stroke participant characteristics

|                                        | Premorbid mobility                                | Age | Gender | Language/s spoken at home | Type of stroke <sup>a</sup> | NIHSS <sup>b</sup> score (days post stroke) | MoCA <sup>c</sup> (days post stroke) | WAB-R AQ <sup>d</sup> score (days post stroke) | Days post-stroke interview conducted |
|----------------------------------------|---------------------------------------------------|-----|--------|---------------------------|-----------------------------|---------------------------------------------|--------------------------------------|------------------------------------------------|--------------------------------------|
| Stroke patients with aphasia (PWA)     |                                                   |     |        |                           |                             |                                             |                                      |                                                |                                      |
| PWA1                                   | Independent                                       | 78  | M      | English                   | L MCA infarct               | 1 (7)                                       | 18/30 (7)                            | 84.6, mild Broca's aphasia (7)                 | 11                                   |
| PWA2                                   | Independent                                       | 78  | M      | English                   | L thalamic infarct          | 4 (10)                                      | 9/30 (11)                            | 72.3, moderate Broca's aphasia (10)            | 13                                   |
| PWA3                                   | Walking stick for distance, independent otherwise | 87  | F      | English                   | L MCA infarct               | 9 (20)                                      | 16/30 (20)                           | 74.8, moderate Broca's aphasia (20)            | 25                                   |
| Stroke patients without aphasia (PWOA) |                                                   |     |        |                           |                             |                                             |                                      |                                                |                                      |
| PWOA1                                  | Independent                                       | 76  | F      | English                   | L lacunar infarct           | 5 (13)                                      | 21/30 (13)                           | --                                             | 17                                   |

|       |             |    |   |                                |                              |        |            |    |    |
|-------|-------------|----|---|--------------------------------|------------------------------|--------|------------|----|----|
| PWOA2 | Independent | 88 | F | Polish,<br>Russian,<br>English | R cerebellar<br>infarct      | 2 (21) | 17/30 (21) | -- | 24 |
| PWOA3 | Independent | 93 | F | English                        | R parenchymal<br>haemorrhage | 8 (16) | 18/30 (16) | -- | 21 |
| PWOA4 | Independent | 78 | M | English                        | R MCA and R<br>ACA infarcts  | 0 (9)  | 22/30 (9)  | -- | 21 |

Notes: <sup>a</sup>R= right hemisphere, L= left hemisphere, MCA= middle cerebral artery, ACA= anterior cerebral artery; <sup>b</sup>NIHSS=National Institute of Health Stroke Scale<sup>8</sup>; <sup>c</sup>MoCA= Montreal Cognitive Assessment<sup>9</sup>; <sup>d</sup>WABAQ=Western Aphasia Battery-Revised<sup>67</sup> Aphasia Quotient score.

1  
2  
3 Appendix B.) and were audio recorded. Field notes were completed by the first  
4 author during data collection. Seven staff focus groups were conducted with two to eight  
5 participants in each focus group. One-on-one interviews were conducted with two staff  
6 members. All staff focus groups were completed on the hospital site in various locations  
7 that were private and quiet. Six out of seven stroke patient interviews were conducted in  
8 person during their inpatient admission in their hospital room, and one was completed over  
9 the phone (stroke patient without aphasia) one day following discharge from hospital. All  
10 patient interviews were conducted within fifteen days post-stroke. Interview and focus  
11 groups were 20-60 minutes long, often varying based on the number of participants.  
12 Supported conversation strategies<sup>10</sup> were used during interviews with PWA to facilitate  
13 their participation in the interview. One PWA had two family members present during the  
14 interview. Member checking was conducted during the interviews through clarifying  
15 questions and paraphrasing comments for confirmation by participants.

### 26 **Data analysis**

27 Focus groups and interviews were transcribed verbatim. Responses to any leading  
28 questions were removed from the data set.<sup>11</sup>

29 The theoretical framework for this research was a qualitative description approach.<sup>12</sup>  
30 This approach involves describing patient experiences, with minimal interpretation of the  
31 data to minimise potential bias of the researchers.<sup>12</sup> Participant experiences were analysed  
32 using NVivo<sup>10</sup> computer software to manage the data. Data were grouped into themes  
33 according to content.<sup>11</sup> The first level of coding identified the broad content of the data then  
34 sub-categories were identified.<sup>11</sup> Single lines of data were not removed from their 'story'  
35 during data analysis to maintain the context and help ensure meaning was not lost or  
36 misinterpreted.<sup>11</sup> Ongoing critical review of the categories were conducted and themes  
37 were reviewed by a second researcher.<sup>12</sup>

### 48 **Results**

49 The key themes from the focus group and interviews related to barriers and  
50 facilitators to communication, with sub-categories identified which related to hospital, staff  
51 and patient factors (Figure 2.).  
52  
53  
54  
55  
56  
57  
58  
59  
60



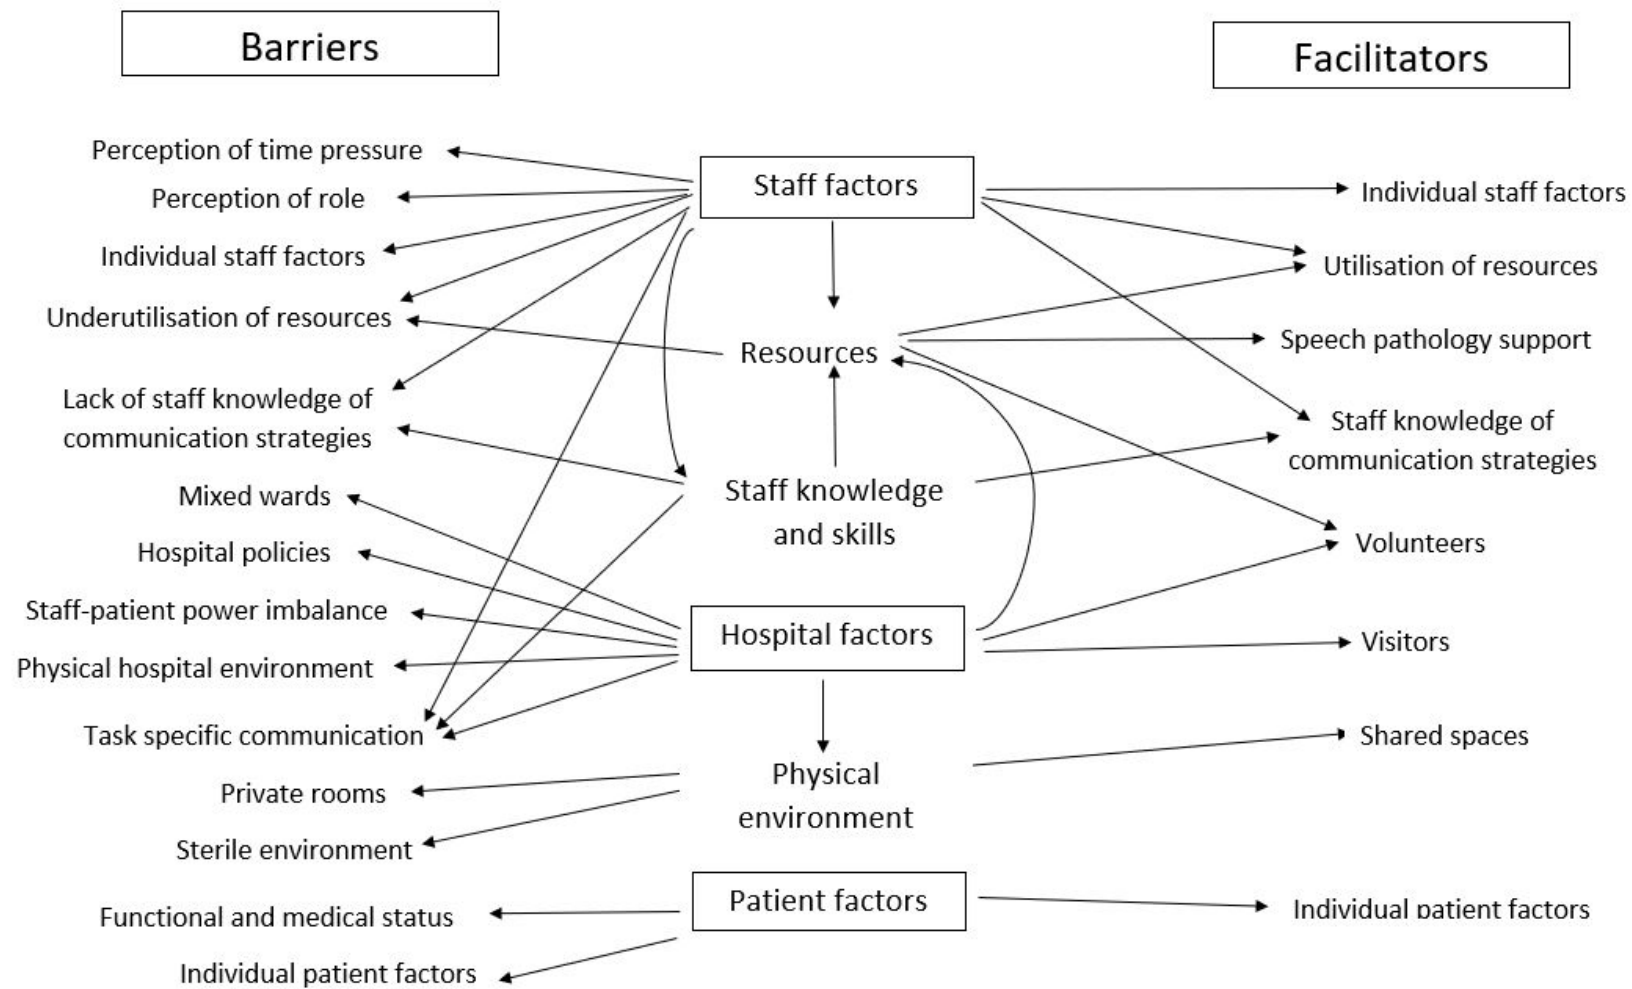

Figure 2. Summary of themes and subthemes of staff and patient perceptions to barriers and facilitators to stroke inpatient communication and language activities.

## Barriers to Communication

### Hospital related factors

#### Private rooms reduce opportunities for social interaction

Staff and patients described the impact of single rooms which limited incidental socialisation with other patients and their visitors.

We used to co-locate our stroke patients and often using our shared rooms. That's when people had more opportunities for interacting with one another. (MedC1)

#### Mixed wards affect staff acquisition of specialist skills

Staff described their perception of the negative effect a mixed hospital ward had on the acquisition of stroke specific specialist skills.

Having a stroke specific ward... everybody on the ward would be trained...and that's the only thing they'd have to focus on rather than having lots of other patients with lots of medical conditions. (OT4)

#### Hospital environment does not encourage socialising

Staff talked about the physical hospital ward environment affecting social interaction as it contributed to a sterile atmosphere rather than one that promoted social activity. Staff also talked about the consequence of background noise and environmental distractors in large shared rooms on the acute ward which reduced their ability to communicate with stroke patients with communication impairments.

My general feeling of rehab [rehabilitation] is that they come to their sessions and then they go back to their lonely dark room... I don't really see the rooms as a particularly happy, busy place where they are getting a lot out of being in there... the dining rooms... they're not a particularly pleasant place to be either. (PT2)

#### Hospital policies restrict the development of communication-promoting ideas and initiatives

Hospital policies were perceived by staff as a barrier to communication, negatively influencing their ability to develop ideas and initiatives to increase patients' opportunities for social interaction.

It's just every time you try and do something you hit a barrier... you do try and think outside the box what more can you do for this patient and you get another hospital rule. (PT2)

### **Power imbalance of staff and patients in hospital controls patients' ability to access communication opportunities**

Staff and patients discussed the influence of the power imbalance for patients in hospital, and patient perceptions that they have to do what is expected in the hospital environment. This appeared to limit the patients' ability to freely engage and explore the environment resulting in patients retreating to their rooms and limiting their opportunities to engage in activities.

I think most males like to account for their time um and I felt like I haven't been able to do that and that's, that's the bit that I'm really, really lacking. (PWA2)

I was in the hospital so I think I had to stick into the room, to the rules. (PWOA2)

Very often when you're in a hospital you do what you think you're expected to do. (SP4)

### **Task specific communication reduces patients' communication opportunities**

Staff talked about the nature of interactions with patients as often being driven by the patient's care, restricting opportunities for communication beyond this context.

I know we aim to be very holistic... but very often care is very[sic] directed from a medical health care perspective (SP4)

### **Staff related factors**

#### **Staff's perception of time pressures limiting opportunities for communication**

Both patients and staff perceived staff time pressures as a barrier negatively effecting communication on the wards. Some staff reported that they felt interactions with patients with communication impairments required extra time which was challenging in a time pressured hospital environment. Time pressures were also perceived to restrict the staff's ability to facilitate opportunities for patients to socialise with other patients. For example, nurses appeared to deprioritise transferring patients to the communal area for lunch in busier times.

If they're hoist patients it might not be as easy for staff to get them to the dining room, that wouldn't totally prevent someone from going, it would just depend on the time that people had on the day. (SW3)

#### **Staff and patient's underutilisation of available resources**

Staff described the lack of accessible resources as a factor negatively affecting staff-patient communication. They described the need for resources when communicating with

1  
2  
3 patients with aphasia and other communication impairments. They also described a number  
4 of resources that they felt patients were not aware of and therefore did not utilise.  
5

6  
7 There are all of these opportunities but I don't think a lot of the patients access them  
8 so it sounds like great communicative opportunities for them but the reality is that a  
9 lot of them are sitting in their rooms most of the times by themselves watching  
10 television and most of the interactions they have is with the nurses or just whoever  
11 comes in to see them. (SP4)  
12  
13  
14  
15

### 16 **Individual staff factors leading to restricted opportunities for communication**

17  
18 Staff described individual staff factors such as personality, values and attitudes  
19 influencing communication opportunities for stroke patients, such as staff providing  
20 patients with opportunities for incidental social interaction during routine tasks.  
21

22  
23 Often if people need to go in and see the patient let's just say to take obs  
24 [observations] or to do a wash... they don't always use that opportunity as an  
25 opportunity to chat... there could be more opportunity to chat at those times whilst  
26 they are doing what they need to get done and you know that varies from person to  
27 person, personality as well and how busy people are, what else is going on. (SP3)  
28  
29  
30  
31

### 32 **Staff's perception their role does not include communication tasks**

33  
34 Some staff perceived communication as a task separate from the responsibility of their role  
35 therefore limiting their facilitation of communication opportunities for stroke patients.  
36

37  
38 They [speech pathologists] do their bit and we do ours... we don't have time to  
39 practice speech with them because we really do have to get all of our jobs filled in  
40 the time and it's specifically rostered for us to do our work, not to help with  
41 someone else's. (RehabN1)  
42  
43  
44

### 45 **Lack of staff knowledge and skills resulting in unsuccessful communication interactions or 46 avoiding communication interactions**

47  
48 Staff described a lack of knowledge and skills in communicating with stroke patients with  
49 communication impairments. Some staff reported feeling anxious about encouraging  
50 patients to communicate as communication breakdowns may cause stress and anxiety for  
51 the patient, and the staff member. Staff reported a lack of confidence in their ability to  
52 repair communication breakdowns which resulted in increased time pressures in their  
53 sessions, often leading them to avoid encouraging communication interactions within their  
54 treatment sessions.  
55  
56  
57  
58  
59  
60

1  
2  
3 I find it challenging... knowing how the best way to communicate with that person  
4 [with aphasia]... then [they] become very frustrated and not have the tools  
5 themselves to communicate back to me and you would never want to leave  
6 someone in that space. So that's something that I struggle with. (SW2)  
7  
8  
9

### 10 **Patient related factors**

#### 11 **Patients' functional and medical status limiting their ability to seek out and engage in** 12 **activities**

13  
14  
15  
16 Staff and patients perceived patients' medical status as a barrier to communication  
17 by limiting their ability to engage with their environment including independently seeking  
18 out activities and being able to utilise communal areas.  
19

20  
21 If someone is bed bound, you know the interaction is very minimal... you often walk  
22 past and you see them alone in their room... you wonder what happens during those  
23 periods of time where they're just in their room and they don't have family. (OT2)  
24

25  
26 Well I can't do anything cos I can't go off by myself and do anything. (PWOA2)  
27

#### 28 **Individual patient factors limiting opportunities for communication**

29  
30 Staff described individual patient factors such as personality, mood and motivation  
31 communication opportunities for stroke patients such as independent practice of  
32 communication therapy tasks, and social opportunities with patients and hospital staff.  
33

34  
35 We have to recognise some patients who have had strokes ... they're fed up with  
36 having people poking and prodding them then have a volunteer and go "do you want  
37 to do your exercises for speech?" (VM)  
38  
39

### 40 **Facilitators to Communication**

#### 41 **Hospital related factors**

#### 42 **Shared rooms/co-location encourages incidental social interactions**

43  
44 Staff talked about use of communal areas at other hospitals which facilitated socialisation  
45 and communication during non-therapy times and during group therapy. Staff described the  
46 importance of the use of communal areas given the large number of private rooms on the  
47 ward. Patients also described the need to be co-located to promote social interaction.  
48

49  
50 I think that, put the [sic] whole lot of people together and ah and they [sic]  
51 something collective, that's what human beings are put together for ... sitting around  
52 talking... over the proverbial cuppa. (PWA2)  
53  
54

#### 55 **Visitors provide patients opportunities for socialisation**

1  
2  
3 Staff identified visitors as a facilitator to communication interaction for stroke patients  
4 outside of therapy times during their inpatient admission.

5  
6 Interaction with the family... it's not therapy based but it's their [stroke patients']  
7 opportunity to practice. (PT1)

### 10 **Volunteers facilitate opportunities for patients to engage in social activities**

11 Staff discussed the benefit of volunteers in facilitating opportunities for patients to engage  
12 in social interactions including programs involving therapy dogs, book loaning, hand  
13 massages, and taking patients off the ward.

14  
15  
16 If we see people that are lonely, are not getting visitors, there's many volunteers... to  
17 go and visit them and if they're well enough they can take them out... the volunteers,  
18 we do rely on them. (OTA)

### 25 **Staff related factors**

#### 27 **Staff utilisation of resources promote communication exchange**

28 Staff identified access to resources such as chat books and alternative and augmentative  
29 communication boards often facilitated communication interactions with stroke patients  
30 with communication impairments on the ward.

31  
32  
33 Sometimes with the ... signs... "do you want to drink? some water?" or something, so  
34 they can just point because ... they want to say something and maybe the right  
35 words are not coming out... that also helps. (RehabN3)

#### 40 **Speech pathology support and education facilitates staff's use of communication 41 promoting strategies**

42 Staff reported support and education from speech pathology staff facilitated their ability to  
43 interact successfully with stroke patients with aphasia.

44  
45 I had a patient who had word finding difficulties... I just was observing the speechie  
46 [speech pathologist], she would just be like "no, what do you mean?" and he'll be  
47 like [pointing] and she'll be like "tell me what's the word"... it's something I could  
48 have just added to my session. (PT4)

#### 54 **Staff knowledge and utilisation of communication strategies promotes communication 55 activities**

1  
2  
3 Staff and volunteers discussed the use of communication strategies and resources to  
4 facilitate communication on the ward for patients with a variety of communication  
5 impairments.  
6  
7

8 We use communication boards, pictures, writing things down, talking slowly.

9  
10 (MedC2)

11  
12 If they are having trouble, I will say to them "it's okay you don't need to hurry, that's  
13 fine". (V1)  
14  
15

### 16 **Individual staff factors promote communication opportunities for patients**

17 Staff and patients talked about how individual characteristics of staff, including  
18 rapport building and being friendly, facilitated communication for patients with  
19 communication difficulties.  
20  
21

22  
23 Sometimes they [stroke patients] look for that specific person... the more they get  
24 confident, the more they get relaxed, the more their speech enhances as well.

25  
26 (RehabN3)  
27  
28  
29  
30

### 31 **Discussion**

32 This study aimed to explore hospital staff, volunteers and stroke patients'  
33 perceptions of barriers and facilitators to communication on an acute and a rehabilitation  
34 ward. A wide range of factors were perceived to act as potential barriers or facilitators to  
35 communication. Additionally, a number of factors influencing patient access to  
36 communication opportunities appeared to influence one another.  
37  
38

39 The co-location of patients in therapy spaces, dining areas or in shared rooms were  
40 perceived as facilitators to communication for stroke inpatients providing opportunities for  
41 incidental social interactions with other patients and their visitors. However, background  
42 noise in these shared spaces was also perceived to act as a barrier to patients' ability to  
43 engage in communication. Patient access to communal spaces was influenced by a number  
44 of factors including patients' sense of autonomy to freely explore the hospital ward  
45 environment, and their medical and mobility status, and staff's perception of their available  
46 time, which influenced staff's perception of whether they transferred patients to these  
47 spaces. Rosbergen et al<sup>14</sup> reported that in an acute stroke ward enriched environment  
48 communal mealtimes and group activities were perceived to facilitate social activity. The  
49 study by Rosbergen et al<sup>14</sup> found that staff reported perceptions that shared rooms limited  
50  
51  
52  
53  
54  
55  
56  
57  
58  
59  
60

1  
2  
3 staff and patients' ability to engage in private conversations, consistent with O'Halloran et  
4 al's<sup>15</sup> findings. It may be that access to both private and communal spaces available within  
5 the hospital environment play critical roles in regards to providing opportunities for social  
6 interactions with other patients and their visitors and opportunities for privacy when  
7 required.  
8  
9

10  
11  
12 The predominance of single rooms and limited opportunities to access shared spaces  
13 may have increased the effect of other barriers on communication opportunities for  
14 patients. For example, a patient with poor autonomy may be more likely to remain alone in  
15 their single room when they are not attending therapy, as they perceive they are not  
16 'allowed' to freely explore the hospital environment. This may reduce the likelihood of the  
17 individual independently seeking out social interactions beyond their room. If they also have  
18 reduced mobility, they may be more reliant on staff to facilitate transfers to communal  
19 spaces which may be impacted by staff time constraints. The person's functional status may  
20 also limit their ability to initiate and engage in activities while they are in their room.  
21 Therefore, the combined effect of these barriers may significantly limit this patient's  
22 communication opportunities.  
23  
24  
25  
26  
27  
28  
29  
30  
31

32  
33 These communication barriers may be mitigated by having regular visitors to provide  
34 opportunities for communication and socialisation within their room, and facilitate patient  
35 access to shared spaces, such as helping mobilise wheelchair bound patients into communal  
36 dining areas or education to patients that they are allowed to explore the hospital ward  
37 environment. Rosbergen et al<sup>14</sup> identified patient and family autonomy to initiate and direct  
38 activity as a factor enriching the acute ward environment. Therefore, increasing patient  
39 autonomy within this setting may facilitate their ability to seek out interactions within the  
40 environment and increase engagement in communication activity, which may then reduce  
41 the effect of being in a single room with reduced mobility and time poor staff.  
42  
43  
44  
45  
46  
47  
48

49 A potential lack of opportunities to access social interactions with other patients  
50 means staff, including volunteers, and visitors may become the main communication  
51 partner for stroke inpatients. Godecke et al's<sup>3</sup> observation study found that nurses are the  
52 most frequent communication partner for patients with aphasia, after their family  
53 members, therefore patient-staff interactions may play a significant role for those patients  
54 with minimal or no visitors. Within the current study, communication between staff and  
55 patients appeared to be dependent on a number of factors including staff perception of  
56  
57  
58  
59  
60



1  
2  
3 their role, their knowledge and skills in facilitating communication, their values and  
4 attitudes towards communication and whether supporting language and communication for  
5 stroke patients with aphasia is part of their 'role', their willingness to be flexible with their  
6 time, and their knowledge of and access to resources which may be used to facilitate  
7 communication. This also highlights the potential impact of the perceived power imbalance  
8 between staff and patients and the significance of interactions that are task directed. Hersh  
9 et al<sup>16</sup> reported stroke patients with aphasia felt disempowered in communicative  
10 interactions with nurses, where nurses tended to talk to the task and controlled the  
11 interactions. This highlights the need for communication partner training which may provide  
12 staff with the knowledge and skills required to support effective communication with  
13 patients with aphasia.<sup>17</sup>

14  
15  
16  
17  
18  
19  
20  
21  
22  
23  
24  
25  
26  
27  
28  
29  
30  
31  
32  
33  
34  
35  
36  
37  
38  
39  
40  
41  
42  
43  
44  
45  
46  
47  
48  
49  
50  
51  
52  
53  
54  
55  
56  
57  
58  
59  
60

Time pressure was perceived as a major barrier to communication impacting on staff's ability to support successful communication within their interactions with patients, and facilitate patients' opportunities to engage in interactions in social or communal areas. Time constraints have been reported to limit communicative opportunities between stroke in-patients and nurses.<sup>18</sup> Ball et al<sup>18</sup> found that 86% of surveyed nurses reported one or more activities had been "left undone" in their last shift as a result of lack of time. The study found that activities most likely to be missed by nurses as a result of time constraints were comforting and talking to patients (66%) and patient education (52%).<sup>18</sup> This has also been identified by patients who "did not like to bother the busy nurse".<sup>19</sup> Time limitations and pressures on the wards may be facilitated by developing staff knowledge of and skills in using communication promoting strategies. Effective and efficient nurse patient communication as a result of nurse training has been found to save time, reduce frustration and reduce the burden associated with caring for PWA.<sup>20</sup>

This study included a small number of medical and nursing staff in comparison to compared to allied health staff which may be reflected in the reported results. This study also involved a small number of stroke participants and a broader range of perspectives may have been expressed with a larger number of participants. The results of this study may reflect the context of a private metropolitan hospital therefore further exploration of stroke patient and staff perspectives in the public sector may be warranted.

## Conclusions

1  
2  
3 The barriers and facilitators to communication appear to be interconnected and  
4 likely to influence one another, suggesting that the level of communication access may vary  
5 from patient to patient within the same setting. The identification of factors that support  
6 inpatient communication may reduce the risk of stroke patients with aphasia and other  
7 communication impairments developing maladaptive communication behaviours such as  
8 learned non-use of communication. A CEE has the potential to benefit stroke patients with  
9 and without communication impairments by increasing communication access, improving  
10 patient well-being, promoting overall engagement in stroke rehabilitation and improving  
11 post-stroke recovery.  
12  
13  
14  
15  
16  
17  
18  
19

### 20 **Acknowledgements**

21 The authors would like to thank the hospital and staff for supporting this study and assisting  
22 in participant recruitment. We would also like to thank all the participants in this study for  
23 sharing their experiences and insights.  
24  
25  
26

### 27 **Data sharing statement**

28 Data is stored to NHMRC standards and will be available (in a de-identified manner) on  
29 request.  
30  
31  
32  
33  
34  
35  
36  
37  
38  
39  
40  
41  
42  
43  
44  
45  
46  
47  
48  
49  
50  
51  
52  
53  
54  
55  
56  
57  
58  
59  
60

## References

1. Fazio S, Stocking J, Kuhn B, et al. How much do hospitalized adults move? A systematic review and meta-analysis. *Appl Nurs Res.* 2019; <https://doi.org/10.1016/j.apnr.2019.151189>
2. Janssen H, Ada L, Bernhardt J, et al. Physical, cognitive and social activity levels of stroke patients undergoing rehabilitation within a mixed rehabilitation unit. *Clin Rehabil.* 2014;28:91–101.
3. Godecke E, Armstrong E, Hersh D, et al. Missed Opportunities: Communicative interactions in early stroke recovery. Conference presentation at Stroke Society of Australasia Annual Scientific Meeting; 2014; Hamilton Island, Queensland.
4. Eng X, Brauer SG, Kuys SS, et al. Factors affecting the ability of the stroke survivor to drive their own recovery outside of therapy during inpatient stroke rehabilitation. *Stroke Research and Treatment.* 2014;1-8.
5. Teasdale G, Jennett B. Assessment of coma and impaired consciousness. A practical scale. *Lancet.* 1974;2(7872):81–4.
6. Kertesz A. *Western Aphasia Battery- Revised.* San Antonio, TX, Harcourt Assessment; 2006.
7. NIH stroke scale [Internet]. Bethesda, Md, National Institute of Neurological Disorders and Stroke (U.S.). 2011 [cited 2016 Feb 10]. Available from [https://www.ninds.nih.gov/sites/default/files/NIH\\_Stroke\\_Scale.pdf](https://www.ninds.nih.gov/sites/default/files/NIH_Stroke_Scale.pdf)
8. Nasreddine ZS, Phillips NA, Bédirian V, Charbonneau S, Whitehead V, Collin I, et al. The Montreal Cognitive Assessment, MoCA: a brief screening tool for mild cognitive impairment. *J Am Geriatr Soc.* 2005;53(4):695-9.
9. Kagan, A. Supported conversation for adults with aphasia: methods and resources for training conversation partners. *Aphasiology.* 1998;12(9):816-830.
10. Milne J, Oberle K. Enhancing rigour in qualitative description: A case study. *J Wound Ostomy Continence Nurs.* 2005;32(6):413-420.
11. Neergaard MA, Olesen F, Anderson RS, & Sondergaard, J. Qualitative description- the poor cousin of health research. *BMC Med Res Methodol.* 2009;9(1):52-7.
12. NVivo qualitative data analysis software; QSR International Pty Ltd. Version 12, 2018.
13. Rosbergen IC, Brauer SG, Fitzhenry S, Grimley RS, Hayward KS. Qualitative investigation of the perceptions and experiences of nursing and allied health

- 1  
2  
3 professionals involved in the implementation of an enriched environment in and  
4 Australian acute stroke unit. *BMJ Open*. 2017 Dec 21; 7(12):e018226.  
5  
6  
7 14. O'Halloran R, Grohn B, Worrall L. Environmental factors that influence  
8 communication for patients with a communication disability in acute hospital stroke  
9 units: A qualitative metasynthesis. *Arch Phys Med Rehabil*. 2012;93(1):S77-S85.  
10  
11 15. Hersh D, Godecke E, Armstrong E, Ciccone N, Bernhardt J. "Ward talk": Nurses'  
12 interaction with people with and without aphasia in the very early period poststroke.  
13 *Aphasiology*. 2016;30(5):609-628.  
14  
15 16. Simmons-Mackie N, Raymer A, Armstrong E, Holland A, Cherney LR. Communication  
16 partner training in aphasia: A systematic review. *Arch Phys Med Rehabil*.  
17 2010;91:1814-1837.  
18  
19 17. Ball JE, Murrells T, Rafferty AM, Morrow E, Griffiths P. 'Care left undone' during  
20 nursing shifts: Associations with workload and perceived quality of care. *BMJ Qual*  
21 *Saf*, 2014;23(2):116-125.  
22  
23 18. McCabe C. Nurse-patient communication: An exploration of patients' experiences. *J*  
24 *Clin Nurs*. 2004;13:41-49.  
25  
26 19. McGilton K, Sorin-Peters R, Sidani S, Rochon E, Boscart V, Fox M. Focus on  
27 communication: Increasing the opportunity for successful staff-patient interactions.  
28 *Int J Older People Nurs*. 2009;6:13-24.  
29  
30 20. Tong A, Sainsbury, Craig J. Consolidated criteria for reporting qualitative research  
31 (COREQ): A 32-item checklist for interviews and focus groups. *International Journal*  
32 *for Quality in Health Care*. 2007;19(6), 349-357.  
33  
34  
35  
36  
37  
38  
39  
40  
41  
42  
43  
44  
45  
46  
47  
48  
49  
50  
51  
52  
53  
54  
55  
56  
57  
58  
59  
60

Table 1. Staff participants

| Staff/volunteer groups       |   |                                       |   |                |   |
|------------------------------|---|---------------------------------------|---|----------------|---|
| Medical & Nursing            | N | Allied Health                         | N | Volunteer      | N |
| Acute nurses (AN)            | 2 | Dietitian (DT)                        | 1 | Volunteers (V) | 6 |
| Clinical nurse manager (CNM) | 1 | Occupational therapy manager (OTM)    | 1 |                |   |
| Medical consultants (MC)     | 2 | Occupational therapists (OT)          | 5 |                |   |
| Rehabilitation nurses (RN)   | 8 | Occupational therapy assistants (OTA) | 3 |                |   |
|                              |   | Physiotherapists (PT)                 | 8 |                |   |
|                              |   | Physiotherapy assistants (PTA)        | 2 |                |   |
|                              |   | Social workers (SW)                   | 5 |                |   |
|                              |   | Speech pathology manager (SPM)        | 1 |                |   |
|                              |   | Speech pathologists (SP)              | 4 |                |   |
|                              |   | Speech pathology assistant (SPA)      | 1 |                |   |
|                              |   | Volunteer manager (VM)                | 1 |                |   |

1  
2  
3  
4  
5  
6  
7  
8  
9  
10  
11  
12  
13  
14  
15  
16  
17  
18  
19  
20  
21  
22  
23  
24  
25  
26  
27  
28  
29  
30  
31  
32  
33  
34  
35  
36  
37  
38  
39  
40  
41  
42  
43  
44  
45  
46  
47  
48  
49  
50  
51  
52  
53  
54  
55  
56  
57  
58  
59  
60

For peer review only

Table 2. Stroke participant characteristics

|                                        | Premorbid mobility                                | Age | Gender | Language/s spoken at home | Type of stroke <sup>a</sup> | NIHSS <sup>b</sup> score (days post stroke) | MoCA <sup>c</sup> (days post stroke) | WAB-R AQ <sup>d</sup> score (days post stroke) | Days post-stroke interview conducted |
|----------------------------------------|---------------------------------------------------|-----|--------|---------------------------|-----------------------------|---------------------------------------------|--------------------------------------|------------------------------------------------|--------------------------------------|
| Stroke patients with aphasia (PWA)     |                                                   |     |        |                           |                             |                                             |                                      |                                                |                                      |
| PWA1                                   | Independent                                       | 78  | M      | English                   | L MCA infarct               | 1 (7)                                       | 18/30 (7)                            | 84.6, mild Broca's aphasia (7)                 | 11                                   |
| PWA2                                   | Independent                                       | 78  | M      | English                   | L thalamic infarct          | 4 (10)                                      | 9/30 (11)                            | 72.3, moderate Broca's aphasia (10)            | 13                                   |
| PWA3                                   | Walking stick for distance, independent otherwise | 87  | F      | English                   | L MCA infarct               | 9 (20)                                      | 16/30 (20)                           | 74.8, moderate Broca's aphasia (20)            | 25                                   |
| Stroke patients without aphasia (PWOA) |                                                   |     |        |                           |                             |                                             |                                      |                                                |                                      |
| PWOA1                                  | Independent                                       | 76  | F      | English                   | L lacunar infarct           | 5 (13)                                      | 21/30 (13)                           | --                                             | 17                                   |

|       |             |    |   |                                |                              |        |            |    |    |
|-------|-------------|----|---|--------------------------------|------------------------------|--------|------------|----|----|
| PWOA2 | Independent | 88 | F | Polish,<br>Russian,<br>English | R cerebellar<br>infarct      | 2 (21) | 17/30 (21) | -- | 24 |
| PWOA3 | Independent | 93 | F | English                        | R parenchymal<br>haemorrhage | 8 (16) | 18/30 (16) | -- | 21 |
| PWOA4 | Independent | 78 | M | English                        | R MCA and R<br>ACA infarcts  | 0 (9)  | 22/30 (9)  | -- | 21 |

Notes: <sup>a</sup>R= right hemisphere, L= left hemisphere, MCA= middle cerebral artery, ACA= anterior cerebral artery; <sup>b</sup>NIHSS=National Institute of Health Stroke Scale<sup>8</sup>; <sup>c</sup>MoCA= Montreal Cognitive Assessment<sup>9</sup>; <sup>d</sup>WABAQ=Western Aphasia Battery-Revised<sup>67</sup> Aphasia Quotient score.



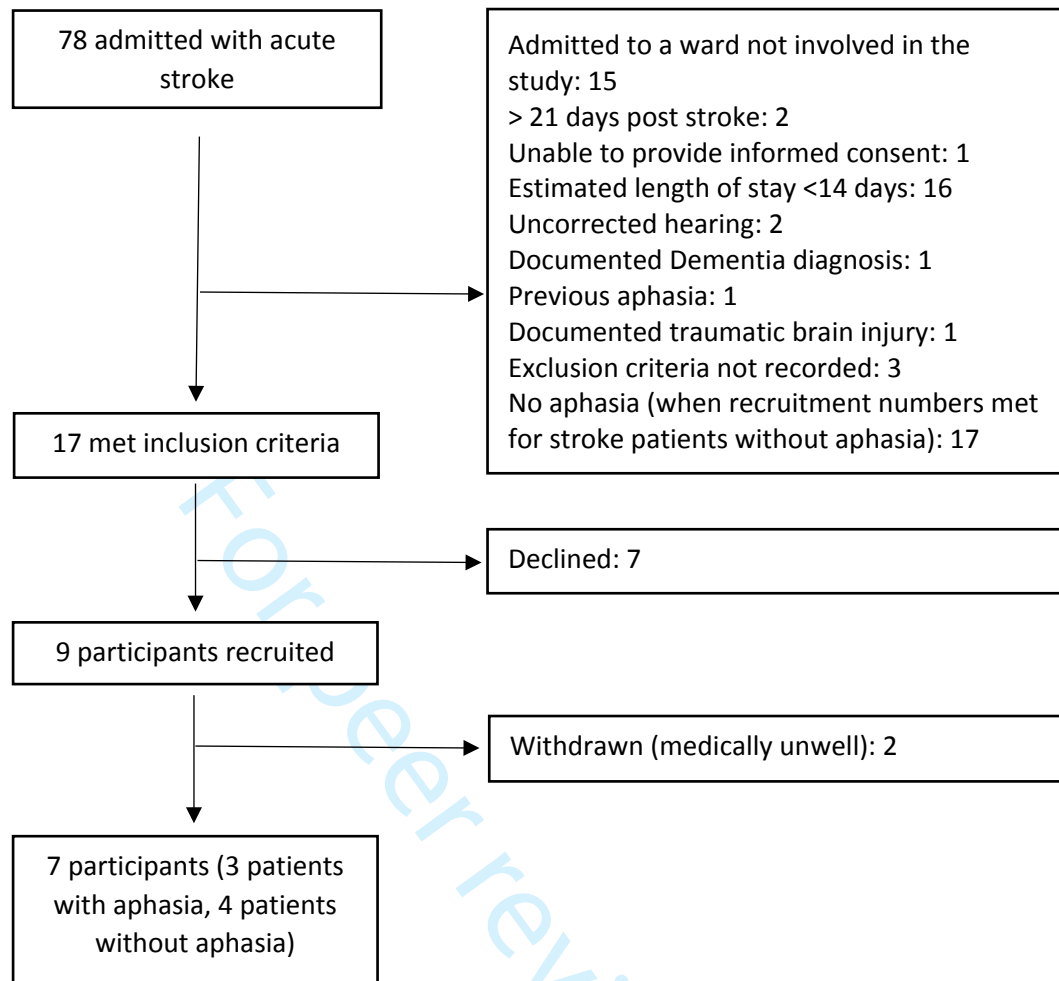

Figure 1. Summary of stroke participant screening and recruitment

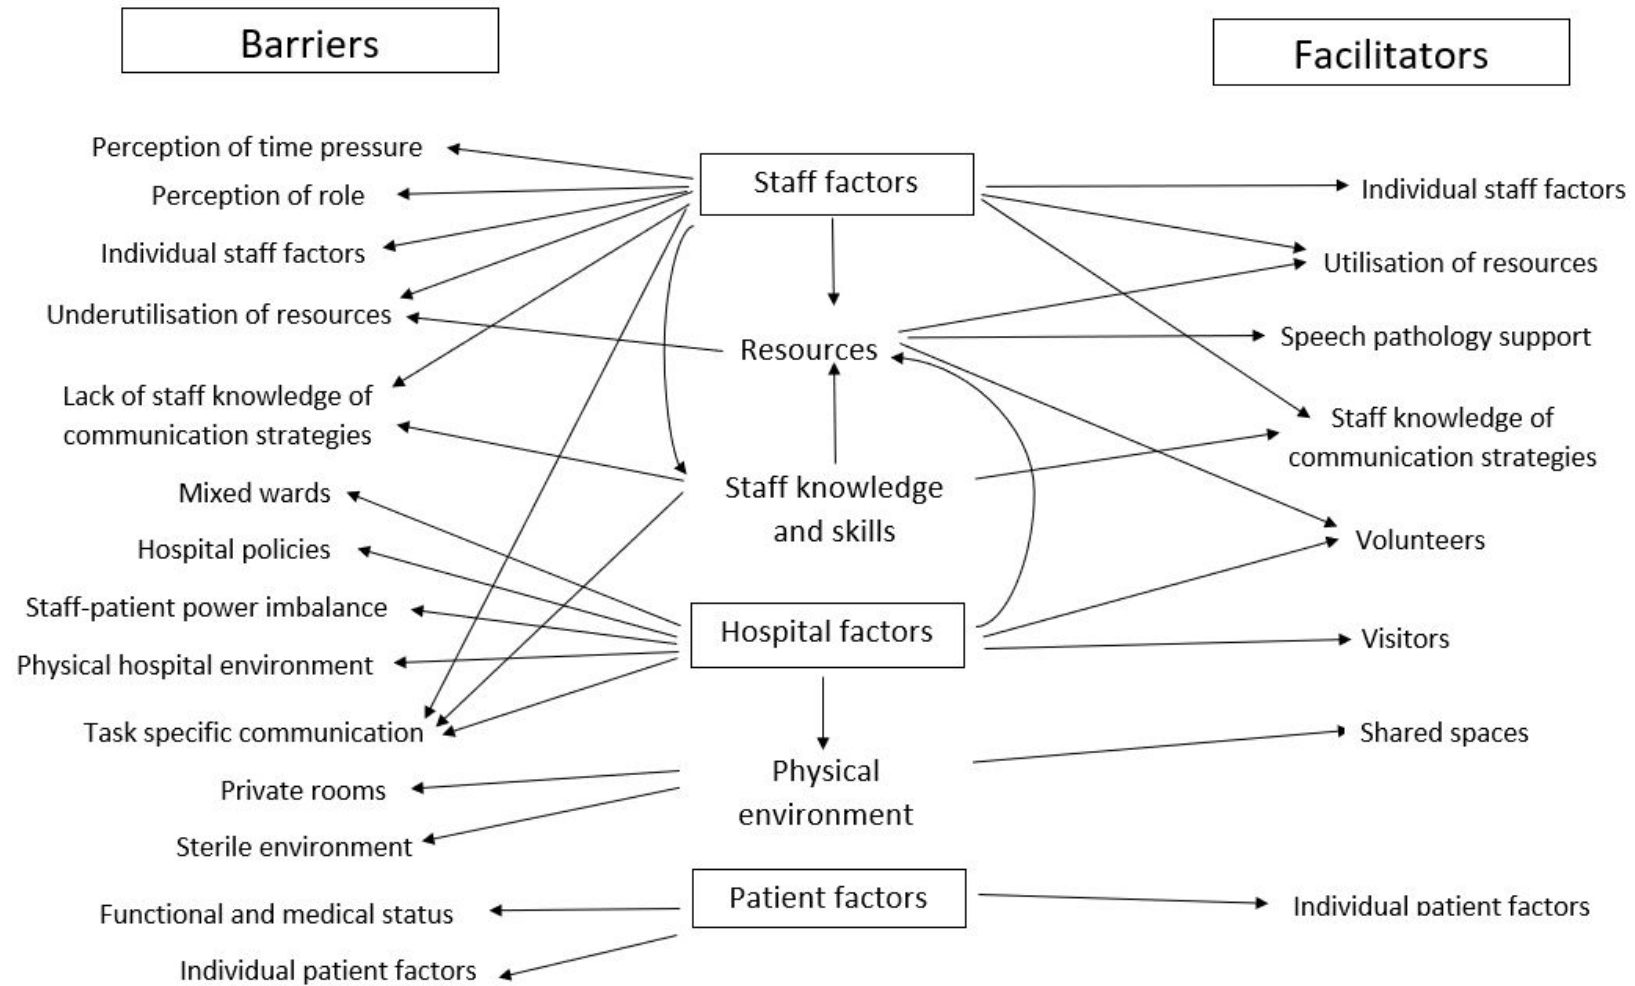

Figure 2. Summary of themes and subthemes of staff and patient perceptions to barriers and facilitators to stroke inpatient communication and language activities.

**Appendix A.****Investigating Communication Enhanced Environments after stroke: Staff focus group guide**

What kind of language activities or language tasks do stroke patients currently participate in on the ward?

What kind of language activities or language tasks would you like see stroke patients have access to on the wards?

Describe your experience of communicating with stroke patients at the moment.

Can you tell me about anything that facilitates your ability to communicate with stroke patients on the ward?

Can you tell me about any barriers you experience that impact your ability to communicate with stroke patients on the ward?

What changes would you like to see to enhance communication between staff and stroke patients on the ward?

What changes would you like to see to enhance communication between visitors and stroke patients on the ward?

How could we enhance or optimise communication and language tasks and activities for stroke patients on the ward?

What do you think a communication and language enhanced stroke ward environment might look like?

**Appendix B.****Investigating Communication Enhanced Environments after stroke: Patient interview guide**

Tell me about what kind of activities you do while you are here (in hospital).

Describe your experience of communicating with people on the ward.

What makes it easier to communicate with people on the ward?

What makes it hard to communicate with people on the ward?

What can we do to make communicating with people easier?

**Investigating Communication Enhanced Environments (CEE) early after stroke: A before-after non-randomised****controlled pilot study.****Study protocol version 1 19.05.20****Edith Cowan University****Chief Investigator**

Sarah D'Souza

PhD student

School of Psychology and Social Sciences

Edith Cowan University

270 Joondalup Drive,

JOONDALUP WA 6027

s.dsouza@ecu.edu.au

**Co-Investigators**

Associate Professor Erin Godecke, Edith Cowan University

Associate Professor Natalie Ciccone, Edith Cowan University

Dr Heidi Janssen, Hunter New England Local Health District, NSW Health

Associate Professor Deborah Hersh, Edith Cowan University

Professor Elizabeth Armstrong, Edith Cowan University

**Site Investigators**

Claire Tucak, Hollywood Private Hospital

Sarah Wynn, Hollywood Private Hospital

Millie Gallan-Dwyer, Hollywood Private Hospital

## Table of Contents

|    |                                                           |           |
|----|-----------------------------------------------------------|-----------|
| 1  |                                                           |           |
| 2  |                                                           |           |
| 3  | <b>1. Abbreviations and Definitions of Terms.....</b>     | <b>3</b>  |
| 4  |                                                           |           |
| 5  | <b>2. Protocol Synopsis.....</b>                          | <b>4</b>  |
| 6  |                                                           |           |
| 7  | <b>3. Introduction.....</b>                               | <b>7</b>  |
| 8  |                                                           |           |
| 9  | <b>4. Objectives.....</b>                                 | <b>7</b>  |
| 10 |                                                           |           |
| 11 | <b>5. Study Design.....</b>                               | <b>7</b>  |
| 12 |                                                           |           |
| 13 | <b>6. Study Population.....</b>                           | <b>7</b>  |
| 14 |                                                           |           |
| 15 | <b>7. Study Assessment and Procedures.....</b>            | <b>8</b>  |
| 16 |                                                           |           |
| 17 | <b>8. Study Treatment.....</b>                            | <b>8</b>  |
| 18 |                                                           |           |
| 19 | <b>9. Participant Completion and Discontinuation.....</b> | <b>9</b>  |
| 20 |                                                           |           |
| 21 | <b>10. Data Analysis.....</b>                             | <b>9</b>  |
| 22 |                                                           |           |
| 23 | <b>11. Data Management.....</b>                           | <b>9</b>  |
| 24 |                                                           |           |
| 25 | <b>12. Study Report.....</b>                              | <b>10</b> |
| 26 |                                                           |           |
| 27 | <b>13. Administration Procedures.....</b>                 | <b>10</b> |
| 28 |                                                           |           |
| 29 | <b>14. References.....</b>                                | <b>11</b> |
| 30 |                                                           |           |
| 31 | <b>Appendix A. Behavioural mapping tool.....</b>          | <b>12</b> |
| 32 |                                                           |           |
| 33 | <b>Appendix B. Patient interview guide.....</b>           | <b>13</b> |
| 34 |                                                           |           |
| 35 | <b>Appendix C. Staff focus group guide.....</b>           | <b>14</b> |
| 36 |                                                           |           |
| 37 |                                                           |           |
| 38 |                                                           |           |
| 39 |                                                           |           |
| 40 |                                                           |           |
| 41 |                                                           |           |
| 42 |                                                           |           |
| 43 |                                                           |           |
| 44 |                                                           |           |
| 45 |                                                           |           |
| 46 |                                                           |           |
| 47 |                                                           |           |
| 48 |                                                           |           |
| 49 |                                                           |           |
| 50 |                                                           |           |
| 51 |                                                           |           |
| 52 |                                                           |           |
| 53 |                                                           |           |
| 54 |                                                           |           |
| 55 |                                                           |           |
| 56 |                                                           |           |
| 57 |                                                           |           |
| 58 |                                                           |           |
| 59 |                                                           |           |
| 60 |                                                           |           |

## 1 Abbreviations and Definitions of Terms

**CEE:** Communication Enhanced Environment, an adapted model of an Enriched Environment, an environment that provides stroke patients opportunities to engage in language activities during inpatient rehabilitation.

**PWA:** Stroke patients with aphasia.

**PWOA:** Stroke patients without aphasia.

**Language activities:** Language tasks that consist of solitary or interactive language activities.

**Solitary language activities:** Activities that may promote aphasia recovery such as reading, writing, listening to the radio, and the use of iPad applications.

**Interactive language activities:** activities which are based in communicative interactions that involve an exchange of information with a communication partner involving talking, gesture and/or facial expression, reading, writing or drawing to communicate.

**EE:** Enriched Environment, an environment that promotes physical, cognitive and social activity.

For peer review only

## 2. Protocol Synopsis

|                                   |                                                                                                                                                                                                                                                                                                                                                                                                                                                                                                                                                                                                                                                                                                                                                                                                                                                                                                                                                                                                                                                                                                                                                                                                                                                                                                                                                                                                                                                                                                                                                                                                                                                                                                                                                                                                                                                                                                                                                                                                                                                                                                                                                                                                                                                                                                                                                                                                                                                                                                                                                                                                                                                                                                                                                                                                                                                                                                                                                                                                                                                                            |
|-----------------------------------|----------------------------------------------------------------------------------------------------------------------------------------------------------------------------------------------------------------------------------------------------------------------------------------------------------------------------------------------------------------------------------------------------------------------------------------------------------------------------------------------------------------------------------------------------------------------------------------------------------------------------------------------------------------------------------------------------------------------------------------------------------------------------------------------------------------------------------------------------------------------------------------------------------------------------------------------------------------------------------------------------------------------------------------------------------------------------------------------------------------------------------------------------------------------------------------------------------------------------------------------------------------------------------------------------------------------------------------------------------------------------------------------------------------------------------------------------------------------------------------------------------------------------------------------------------------------------------------------------------------------------------------------------------------------------------------------------------------------------------------------------------------------------------------------------------------------------------------------------------------------------------------------------------------------------------------------------------------------------------------------------------------------------------------------------------------------------------------------------------------------------------------------------------------------------------------------------------------------------------------------------------------------------------------------------------------------------------------------------------------------------------------------------------------------------------------------------------------------------------------------------------------------------------------------------------------------------------------------------------------------------------------------------------------------------------------------------------------------------------------------------------------------------------------------------------------------------------------------------------------------------------------------------------------------------------------------------------------------------------------------------------------------------------------------------------------------------|
| <p><b>Study Title:</b></p>        | <p>Investigating Communication Enhanced Environments on acute and rehabilitation wards early after stroke: A before-after non-randomised controlled pilot study</p>                                                                                                                                                                                                                                                                                                                                                                                                                                                                                                                                                                                                                                                                                                                                                                                                                                                                                                                                                                                                                                                                                                                                                                                                                                                                                                                                                                                                                                                                                                                                                                                                                                                                                                                                                                                                                                                                                                                                                                                                                                                                                                                                                                                                                                                                                                                                                                                                                                                                                                                                                                                                                                                                                                                                                                                                                                                                                                        |
| <p><b>Study type:</b></p>         | <p>Interventional</p>                                                                                                                                                                                                                                                                                                                                                                                                                                                                                                                                                                                                                                                                                                                                                                                                                                                                                                                                                                                                                                                                                                                                                                                                                                                                                                                                                                                                                                                                                                                                                                                                                                                                                                                                                                                                                                                                                                                                                                                                                                                                                                                                                                                                                                                                                                                                                                                                                                                                                                                                                                                                                                                                                                                                                                                                                                                                                                                                                                                                                                                      |
| <p><b>Study Intervention:</b></p> | <p>A Communication Enhanced Environment (CEE) model will be developed from pre-intervention observations of inpatient language activities and investigations of barriers and facilitators to communication together through focus groups with hospital staff and interviews with patients on the acute and rehabilitation wards.</p> <p>Sixteen stroke patients will be recruited in this prospective before-after non-randomised controlled pilot study set in an acute and a rehabilitation ward of a metropolitan private hospital. The study includes: i) The baseline phase which involves observation of stroke patients (n=8, 4 stroke patients with aphasia (PWA) and 4 stroke patients without aphasia (PWOA)); the collection of qualitative data through focus groups and semi-structured interviews to determine patient and staff perceived barriers and facilitators to communication; ii) the implementation phase where a model of CEE will be developed and embedded into usual care; iii) the post-implementation phase which will involve repeated baseline data collection on a different cohort of patients (n=8, 4 PWA and 4 PWOA) to determine i) how solitary and interactive language activity levels changed following implementation of the CEE model, ii) the differences post CEE implementation in hospital staff's use of communication promoting strategies when interacting with stroke patients, iii) the differences post CEE implementation in staff and patient perceptions of the barriers and facilitators to inpatient language activities.</p> <p>The CEE model will include the provision of:</p> <p>i) CEE equipment, for example reading materials such as books and magazines, and access and encouragement to reside in a communal dining area;</p> <p>ii) CEE education, support and training for staff with the aim to develop the ability to facilitate language activities for patients after stroke. The training program will be guided by research evidence, expert opinion and baseline data. Staff will complete a questionnaire pre and post training to determine changes in their knowledge, skills and attitudes regarding communication and aphasia.</p> <p><b>Control treatment:</b> Stroke patients with and without aphasia will be observed and video recorded over two week days and one weekend day pre (n=8) and post (n=8) implementation of a CEE model. Behavioural mapping will record patient interactive and solitary language activity observed within the first minute of 5-minute intervals in 4-hour time periods between 7am and 7pm. <i>Solitary language activities</i> are activities that may promote aphasia recovery such as reading, writing, listening to the radio, and the use of iPad applications. <i>Interactive language activities</i> are activities which are based in communicative interactions that involve an exchange of information with a communication partner involving talking, gesture and/or facial expression, reading, writing or drawing to communicate.</p> |



|                                        |                                                                                                                                                                                                                                                                                                                                                                                                                                                                                                                                                                                                                                                                                                                                                                                                                                                                                                                                                                                                                       |
|----------------------------------------|-----------------------------------------------------------------------------------------------------------------------------------------------------------------------------------------------------------------------------------------------------------------------------------------------------------------------------------------------------------------------------------------------------------------------------------------------------------------------------------------------------------------------------------------------------------------------------------------------------------------------------------------------------------------------------------------------------------------------------------------------------------------------------------------------------------------------------------------------------------------------------------------------------------------------------------------------------------------------------------------------------------------------|
| <p><b>Objectives of the Study:</b></p> | <p>This study aims to investigate a CEE on an acute and rehabilitation ward and if stakeholders perceive a CEE within the rehabilitation stroke unit as valuable by addressing the following research questions:</p> <ul style="list-style-type: none"> <li>- Does a CEE increase the amount of time PWA and PWOA spend in participating in solitary and interactive language activities on acute and rehabilitation wards during the early post-stroke period?</li> <li>- What are the differences in stroke patients' experience of communication in a CEE compared to stroke patients' experience of communication in a standard environment on in-patient acute and rehabilitation wards?</li> <li>- What is the experience of implementing a CEE for staff working with PWA and PWOA within in-patient acute and rehabilitation wards?</li> <li>- Do staffs' perceptions of their knowledge of, skills with, and attitude towards communication and aphasia change following implementation of a CEE?</li> </ul> |
| <p><b>Number of Centres:</b></p>       | <p>1</p>                                                                                                                                                                                                                                                                                                                                                                                                                                                                                                                                                                                                                                                                                                                                                                                                                                                                                                                                                                                                              |
| <p><b>Study duration:</b></p>          | <p>5 years</p>                                                                                                                                                                                                                                                                                                                                                                                                                                                                                                                                                                                                                                                                                                                                                                                                                                                                                                                                                                                                        |
| <p><b>Study Hypothesis:</b></p>        | <p>A CEE will increase stroke patient solitary and interactive language activities and improve staff and patient experiences of communication compared to a standard ward environment.</p>                                                                                                                                                                                                                                                                                                                                                                                                                                                                                                                                                                                                                                                                                                                                                                                                                            |
| <p><b>Primary outcomes:</b></p>        | <p>The primary outcome is the change in the proportion of solitary and interactive language activities as a percentage of total observed activity after the implementation of the CEE model.</p> <p>Timepoint: Stroke patient observations completed within 21 days post stroke.</p>                                                                                                                                                                                                                                                                                                                                                                                                                                                                                                                                                                                                                                                                                                                                  |
| <p><b>Secondary outcomes:</b></p>      | <p>The differences post CEE implementation in staff and patient perceptions of the barriers and facilitators to inpatient language activities.</p> <p>Timepoint: Within 18 months of embedding the CEE model.</p>                                                                                                                                                                                                                                                                                                                                                                                                                                                                                                                                                                                                                                                                                                                                                                                                     |
| <p><b>Study design:</b></p>            | <p>T1-T2 before-after non-randomised pilot study</p>                                                                                                                                                                                                                                                                                                                                                                                                                                                                                                                                                                                                                                                                                                                                                                                                                                                                                                                                                                  |
| <p><b>Key inclusion criteria:</b></p>  | <p>Stroke patients will be eligible for inclusion if they have/are: admitted to the acute or rehabilitation ward for a stroke, less than 21 days post stroke during baseline phase or post-implementation phase, the ability to provide informed consent as determined by the medical team, a Glasgow Coma Scale<sup>1</sup> score greater than 10 at the time of screening, an estimated length of hospital stay greater than 14 days, adequate English proficiency to participate in semi-structured interviews and are above 18 years of age. Patients with aphasia will also have an Aphasia Quotient below 93.7 on the Western Aphasia Battery-Revised.<sup>2</sup></p> <p>Staff participants: One representative from each acute and rehabilitation staff group including medical, nursing, volunteers, and allied health staff members (n=17), who are over 18 years old.</p>                                                                                                                                  |
| <p><b>Key exclusion criteria:</b></p>  | <p>Patients will be excluded if they have/are: uncorrected hearing or vision, not medically stable, a documented diagnosis of dementia, traumatic brain injury or previous aphasia, a documented current untreated depression at the time of acute admission or are a participant in another research trial which may affect this study's outcome measures.</p>                                                                                                                                                                                                                                                                                                                                                                                                                                                                                                                                                                                                                                                       |
| <p><b>Study Procedures:</b></p>        | <p><b>Baseline phase:</b> Eligible stroke participants during the baseline phase will be observed and video recorded for 4 hours on 3 consecutive days (one weekend and two weekdays) and will complete a semi-structured interview to explore their experiences of communication, and their</p>                                                                                                                                                                                                                                                                                                                                                                                                                                                                                                                                                                                                                                                                                                                      |

|                                      |                                                                                                                                                                                                                                                                                                                                                                                                                                                                                                                                                                                                                                                                                                                                                                                                                       |
|--------------------------------------|-----------------------------------------------------------------------------------------------------------------------------------------------------------------------------------------------------------------------------------------------------------------------------------------------------------------------------------------------------------------------------------------------------------------------------------------------------------------------------------------------------------------------------------------------------------------------------------------------------------------------------------------------------------------------------------------------------------------------------------------------------------------------------------------------------------------------|
|                                      | <p>perceptions of barriers and facilitators to inpatient language activities during their inpatient admission.</p> <p>Staff will participate in a one-hour focus group to explore their perceptions of barriers and facilitators to inpatient language activities. A focus group interview schedule will be used across all focus groups.</p> <p><b>Implementation phase:</b> The CEE model will be implemented within the acute and rehabilitation wards.</p> <p><b>Post-implementation phase:</b> Intervention group patient observations and interviews, and staff focus groups will replicate baseline data collection.</p>                                                                                                                                                                                       |
| <b>Safety parameters</b>             | <p>Stroke participants and/or their significant others may experience increased levels of distress during recruitment and/or data collection. This may be the result of adjustment following stroke and/or diagnosis of aphasia and increased awareness of impairment. No other risks known regarding participation in this project. The baseline assessments and interview will be conducted by the Chief Investigator who has experience in supporting stroke patients during this early stage of stroke recovery. If a stroke participant or significant others becomes upset or distressed, the assessment or interview will be paused with the option to discontinue and counselling strategies will be provided.</p>                                                                                            |
| <b>Statistical methods /analysis</b> | <p>Patient demographic and stroke characteristics will be presented using descriptive statistics. One-way ANOVA or the Kruskal-Wallis and chi-square tests will examine differences in characteristics between groups. Time spent observed in interactive and solitary language activities will be expressed as a percentage of total observations. A mixed design ANOVA will be used to calculate the within-subjects variable of presence of aphasia and the between-subjects variable of a CEE on language activity levels of participants by comparing baseline to intervention phase observations. A qualitative description research approach will be used for the qualitative component of this research. The mixed methods design will enable the triangulation of the qualitative and quantitative data.</p> |
| <b>Sample size determination:</b>    | <p>The stroke participant sample size was selected for this pilot study to collect data across each observation period for each patient group in the baseline and intervention phases (see document: Observation_protocol_SD_version 3_23-02-16). The sample size for staff participants was selected to capture a sufficient breadth of professional perspectives.</p>                                                                                                                                                                                                                                                                                                                                                                                                                                               |

### 3. Introduction

Aphasia is an acquired communication disorder that affects approximately 30% of first ever ischaemic stroke survivors<sup>3</sup> and persists in up to 61% of survivors one-year post stroke.<sup>4</sup> Aphasia impacts all communication modalities with significant negative consequences for social participation, interpersonal relationships, autonomy, capacity to work and quality of life.<sup>5</sup>

Stroke patients with aphasia (PWA) have been observed to spend less than 28% of their day communicating and 44% of their day alone during their first weeks of inpatient rehabilitation.<sup>6</sup> Inadequate opportunities for communication places PWA at risk of developing maladaptive behaviours such as learned non-use of language.<sup>7</sup>

Environmental Enrichment (EE) refers to conditions which promote physical, cognitive and social activity and has been shown in animal models of stroke to enhance neuroplasticity<sup>8</sup>, promote better learning and memory and contribute to significant improvements in motor function.<sup>9</sup> The human equivalent model<sup>10</sup> in a rehabilitation unit results in stroke patients spending more time engaged in activity and less time sleeping and alone.<sup>11</sup>

### 4. Objectives

Aphasia is a complex language impairment and PWA may need additional support within an Enriched Environment. This pilot study seeks to develop and test an adapted model of an Enriched Environment, a Communication Enhanced Environment (CEE), as a strategy to provide PWA and stroke patients without aphasia (PWOA) more opportunities to engage in language activities during inpatient rehabilitation. Within this study language activities include both *solitary activities* that may promote aphasia recovery such as reading, writing, listening to the radio, and the use of iPad applications, and *interactive activities* which are based in communicative interactions that involve an exchange of information with a communication partner involving talking, gesture and/or facial expression, reading, writing or drawing to communicate.

#### 4.1 Hypotheses

A CEE will increase stroke patient solitary and interactive language activities and improve staff and patient experiences of communication compared to a standard ward environment.

### 5. Study design

This mixed methods pilot study is a prospective before-after non-randomised controlled design in an acute and a rehabilitation ward of a metropolitan private hospital. The study involves three phases:

- i) *Baseline*: observe and quantify the current ward environment;
- ii) *Implementation* of the CEE model;
- iii) *Post-implementation*: assess the impact of the CEE model.

### 6. Study Population

- i) *Stroke patients*: The baseline group (n=8, 4 PWA, 4 PWOA) recruited within the baseline phase, and the intervention group (n=8, 4 PWA, 4 PWOA) recruited during the post-implementation phase.
- ii) *Staff participants*: One representative from each acute and rehabilitation staff group including medical, nursing, volunteers, and allied health staff members (n=17), who are over 18 years old.

### 6.1 inclusion and exclusion criteria

Stroke patients will be eligible for inclusion if they have/are: admitted to the acute or rehabilitation ward for a stroke, less than 21 days post stroke during baseline phase or intervention phase, the ability to provide informed consent as determined by the medical team, a Glasgow Coma Scale<sup>1</sup> score greater than 10 at the time of screening, an estimated length of hospital stay greater than 14 days, adequate English proficiency to participate in semi-structured interviews and are above 18 years of age. Patients with aphasia will also have an Aphasia Quotient below 93.7 on the Western Aphasia Battery-Revised.<sup>2</sup>

Stroke patients will be excluded if they have/are: uncorrected hearing or vision, not medically stable, a documented diagnosis of dementia, traumatic brain injury or previous aphasia, a documented current untreated depression at the time of acute admission or are a participant in another research trial which may affect any of this study's outcome measures.

Staff and volunteers who are over 18 years old will be eligible to participate in this study.

## 7. Study Assessments and Procedures

### Baseline

All recruited stroke participants will complete the Montreal Cognitive Assessment,<sup>11</sup> and The NIH Stroke Scale.<sup>12</sup> PWA will also complete the Western Aphasia Battery-Revised.<sup>2</sup> Stroke participants' behaviour will be observed and video recorded for four hours per day on a Sunday, Monday and Tuesday between 7am to 7pm. A behaviour mapping tool (Appendix A) developed for this study will record stroke participant engagement in language activities in the first minute of each five-minute interval across each four-hour observation period. Semi-structured interviews will explore stroke participants' perceptions of barriers and facilitators to inpatient language activities. An interview schedule will be used across all interviews (Appendix B.). Supportive communication strategies will be used to facilitate PWA participation in interviews with transcriptions annotated to capture any non-verbal responses.

Staff will participate in a one-hour focus group to explore their perceptions of barriers and facilitators to inpatient language activities. A focus group/interview schedule (Appendix C.) will be used across all focus groups.

### Implementation

The CEE model will be implemented within the acute and rehabilitation wards.

### Post implementation

Intervention group patient observations and interviews, and staff focus groups will replicate baseline data collection.

## 8. Study Treatment

The CEE model incorporates the following strategies to encourage engagement in language activities:

- i) Staff training to facilitate stroke patients' communication and provide opportunities to engage in language activities;
- ii) Patient access to:
  - a) Communication enhancement resources such as iPads and audiobooks;
  - b) Communal areas to facilitate engagement amongst patients.

## 9. Participant Completion and Discontinuation

### 9.1 Participant Completion

Participants will have completed the study when they have completed the semi-structured interview.

### 9.2 Participant withdrawal

Participation in this study is voluntary. The participant can withdraw from taking part in the study at any time without giving a reason for withdrawing.

## 10. Data analysis

### 10.1 Primary Analysis

The proportion of observed episodes where PWA and PWOA are engaged in language activities at baseline and post implementation will be analysed using a mixed design ANOVA.

### 10.2 Secondary Analysis

The differences in staff and patient perceptions of the barriers and facilitators to inpatient language activities and communication post CEE implementation will be analysed through a qualitative description approach. Triangulation of the qualitative and quantitative data will be conducted.

## 11. Data management

The data collected will be confidential. No identifying information will be attached to the data and any information that may reveal participant's identity will be removed. The master list of participant names and codes will be kept in a locked filing cabinet at the hospital site which will only be accessible by the research team. All data will be accessed, used and stored in accordance with Commonwealth Privacy Laws. The de-identified data will be stored on a password-controlled computer and/or in a locked cabinet at Edith Cowan University. Electronic data will be backed up on a password controlled hard drive only accessible by the Chief Investigator.

The data collected from this study will have a significant contribution to the aphasia research area and therefore will be stored for 15 years following the completion of this study. Data may be accessed for future studies by the study investigators or higher degrees by research (HDR). In the case of HDR use of the data, the use of the data will be bound by a two-way confidentiality agreement. The data may be used for teaching purposes only with the additional written permission from participants. The data may be made accessible to consumer groups (for example the Australian Aphasia Association) and information may be made available through the National Stroke Foundation and scientific journals. Confidentiality will be maintained in all circumstances. Non-identifiable data will be accessible by researchers through data sharing archives. This data will be governed by an overarching body to ensure data are only used for approved purposes. Researchers who access this data from the data bank will not have access to the participant keys that attach participants to codes therefore data will only be re-identifiable by the Chief Investigator. Data will be deleted from electronic storage and hard copy data will be shredded by the chief investigator after 15 years completion of the research study (with Ethics Committee approval, Ethics approval numbers: HPH431 and ECU HREC 12149). Non-identifiable data will be added to data archives for data sharing. Researchers who access data archives will not have access to information attaching participants to coded data.

## 12. Study Report

This study will be published in a PhD thesis as part of the Chief Investigator's Higher Research Degree. Outcomes from this study will be published in peer review journals and at conferences.

## 13. Administration Procedures

### 13.1 Ethical Considerations

This research is likely to have a significant impact on aphasia recovery following stroke and will form the basis for future study designs. This study will develop a teaching and learning package that can be used in the future to facilitate and promote increased levels of communication activity during early stroke recovery. The implementation of a CEE may address missed opportunities for language stimulation, harness increased levels of neuroplasticity and optimise aphasia language recovery after stroke. The benefit of a CEE may extend beyond patients with aphasia and may improve health care experience and communication access for all stroke in-patients. Additionally, these benefits may extend beyond patients involved in the study as trained staff may use skills and knowledge obtained in the training program to enhance the communication environment of all patients they care for.

### 13.2 Ethical Review Committee

All processes and documentation used within this study will be reviewed and approved by the Edith Cowan University Research Ethics Committee and the site Ethics Committee. The Chief Investigator will complete the annual ethics reports and will be responsible for reporting any adverse events to the Ethics Committees.

### 13.3 Informed Consent

Participants will be excluded if they do not have adequate English proficiency to participate in semi-structured interviews and focus groups. Any participants that require an interpreter will be excluded from inclusion in this study as determined by the medical team.

Patients with aphasia will be provided with aphasia friendly information sheets and consent forms with simple language, bold key words and pictorial support. This will be read and explained by the researcher. Supported conversation strategies will be used to support and facilitate patients with aphasia's involvement and understanding of the research process, informed consent and their rights to withdraw at any time. This will be provided by the Chief Investigator who is a qualified speech pathologist with experience in communicating with patients with aphasia using supported conversation techniques to facilitate and support communication. A detailed information will also be provided to the 'person responsible' for all stroke patients.

### 13.4 Protocol Amendments

All protocol amendments will be reviewed and accepted by the Edith Cowan University Research Ethics Committee and the site research Ethics Committee.

## 14. References

1. Teasdale G, Jennett B. Assessment of coma and impaired consciousness. A practical scale. *Lancet*. 1974;2(7872): 81–4.
2. Kertesz A. *Western Aphasia Battery- Revised*. San Antonio, TX, Harcourt Assessment; 2006.
3. Engelter AT, Gostynski M, Papa S, et al. Epidemiology of aphasia attributable to first ischemic stroke. *Stroke*. 2006 Mar 9;37: 1379–84.
4. Pederson PM, Jørgensen HS, Nakayama H, Raaschou HO, Olsen TS. Aphasia in acute stroke: Incidence, determinants, and recovery. *Annals of Neurology*. 1995 Oct;38(4): 659–66.
5. Kruithof WJ, van Mierlo ML, Visser-Meily JM, van Heugten CM, Post MW. Associations between social support and stroke survivors' health-related quality of life – a systematic review. *Patient Educ Couns*. 2013;93(2): 169–76.
6. Godecke E, Armstrong E, Hersh D, Bernhardt J. Missed Opportunities: Communicative interactions in early stroke recovery. *Stroke Society of Australasia Annual Scientific Meeting*. Hamilton Island, Queensland. 2014.
7. Nithianantharajah J, Hannan AJ. Enriched environments, experience dependent plasticity and disorders of the nervous system. *Nat Rev Neuroscience*. 2006;7(9): 697–709.
8. Janssen H, Bernhardt J, Collier JM, et al. An enriched environment improves sensorimotor function post-ischemic stroke. *Neurorehab Neural Re*, 2010;24(9), 802–813.
9. Janssen H, Ada L, Karayanidis F, et al. Translating the use of an enriched environment poststroke from bench to bedside: study design and protocol used to test the feasibility of environmental enrichment on stroke patients in rehabilitation. *Int J Stroke*. 2012;7: 521–526.
10. Janssen H, Ada L, Bernhardt J, et al. An enriched environment increases activity in stroke patients undergoing rehabilitation in a mixed rehabilitation unit: A pilot non-randomized controlled trial. *Disabil Rehabil*. 2014;36(3), 255–262.
11. Nasreddine ZS, Phillips NA, Bédirian, V, et al. The Montreal Cognitive Assessment, MoCA: A brief screening tool for mild cognitive impairment. *J Am Geriatr Soc*. 2005;53(4): 695–9.
12. NIH stroke scale [Internet]. Bethesda, Md, National Institute of Neurological Disorders and Stroke (U.S.). 2011 [cited 2016 Feb 10]. Available from [https://www.ninds.nih.gov/sites/default/files/NIH\\_Stroke\\_Scale.pdf](https://www.ninds.nih.gov/sites/default/files/NIH_Stroke_Scale.pdf)



Appendix A. Behavioural mapping tool

| Time (5 min): _____                                                                                                                                                                                                                                                            | NO LANGUAGE ACTIVITIES OBSERVED ( <i>describe</i> )                                                                                                             |                                                                                                                                                                                                                                                                                                                                                                                                                                                                                                                                                           |                                                                                                                                                                                                                                                                                                                                                                                                                                                                                                                           | COMMENTS |
|--------------------------------------------------------------------------------------------------------------------------------------------------------------------------------------------------------------------------------------------------------------------------------|-----------------------------------------------------------------------------------------------------------------------------------------------------------------|-----------------------------------------------------------------------------------------------------------------------------------------------------------------------------------------------------------------------------------------------------------------------------------------------------------------------------------------------------------------------------------------------------------------------------------------------------------------------------------------------------------------------------------------------------------|---------------------------------------------------------------------------------------------------------------------------------------------------------------------------------------------------------------------------------------------------------------------------------------------------------------------------------------------------------------------------------------------------------------------------------------------------------------------------------------------------------------------------|----------|
| Location (select one)                                                                                                                                                                                                                                                          | People present                                                                                                                                                  | INTERACTIVE LANGUAGE ACTIVITIES                                                                                                                                                                                                                                                                                                                                                                                                                                                                                                                           | 'OTHER' FUNCTIONAL LANGUAGE ACTIVITIES                                                                                                                                                                                                                                                                                                                                                                                                                                                                                    |          |
| Amenities<br>Bedroom<br>Hall<br>Therapy area<br>Family Mtg Room<br>Activity room<br><br><b>ON WARD</b><br>Doctor's room<br>Dining room<br>Communal area ( <i>describe</i> )<br><br><b>OFF WARD</b><br>Outside<br>Off-unit ( <i>describe</i> )<br><br>Other ( <i>describe</i> ) | Nurse<br>Personal care assistant<br>Doctor<br>Physio<br>OT<br>SP<br>DT<br>Social worker<br>Family/Friend<br>Other patient<br>Alone<br>Other ( <i>describe</i> ) | In person<br>Telephone<br>Therapy session/ward round<br>Other ( <i>describe</i> )<br><br><b>Patient</b><br>Verbal communication<br>Non-verbal gesture/facial expression ( <i>describe</i> )<br><br>Written aids ( <i>writing or reading (circle)</i> )<br>Pictorial aids ( <i>describe</i> )<br>Other communication aid ( <i>describe</i> )<br><br><b>Communication partner/s</b><br>Verbal communication<br>Non-verbal gesture/facial expression( <i>describe</i> )<br><br>Written aids<br>Pictorial aids<br>Other communication aid ( <i>describe</i> ) | Typing/writing<br>Reading ( <i>describe</i> )<br><br>Texting (mobile phone)<br>Listening to radio/music<br>Watching TV<br>Internet use ( <i>describe</i> )<br><br>Word games with a partner<br>Other ( <i>describe</i> )<br><br><b>NON-FUNCTIONAL/ NON-PROPOSITIONAL LANGUAGE ACTIVITIES</b><br>Singing<br>Word games (alone)<br>Language apps (alone)<br>Copying written letters, words, sentences (alone).<br><br><b>OTHER</b><br>Talking to observer<br>Talking to self: appropriate/inappropriate ( <i>describe</i> ) |          |
| Time (5 min): _____                                                                                                                                                                                                                                                            | NO LANGUAGE ACTIVITIES OBSERVED ( <i>describe</i> )                                                                                                             |                                                                                                                                                                                                                                                                                                                                                                                                                                                                                                                                                           |                                                                                                                                                                                                                                                                                                                                                                                                                                                                                                                           | COMMENTS |
| Location (select one)                                                                                                                                                                                                                                                          | People present                                                                                                                                                  | INTERACTIVE LANGUAGE ACTIVITIES                                                                                                                                                                                                                                                                                                                                                                                                                                                                                                                           | 'OTHER' FUNCTIONAL LANGUAGE ACTIVITIES                                                                                                                                                                                                                                                                                                                                                                                                                                                                                    |          |
| Amenities<br>Bedroom<br>Hall<br>Therapy area<br>Family Mtg Room<br>Activity room<br><br><b>ON WARD</b><br>Doctor's room<br>Dining room<br>Communal area ( <i>describe</i> )<br><br><b>OFF WARD</b><br>Outside<br>Off-unit ( <i>describe</i> )<br><br>Other ( <i>describe</i> ) | Nurse<br>Personal care assistant<br>Doctor<br>Physio<br>OT<br>SP<br>DT<br>Social worker<br>Family/Friend<br>Other patient<br>Alone<br>Other ( <i>describe</i> ) | In person<br>Telephone<br>Therapy session/ward round<br>Other ( <i>describe</i> )<br><br><b>Patient</b><br>Verbal communication<br>Non-verbal gesture/facial expression ( <i>describe</i> )<br><br>Written aids ( <i>writing or reading (circle)</i> )<br>Pictorial aids ( <i>describe</i> )<br>Other communication aid ( <i>describe</i> )<br><br><b>Communication partner/s</b><br>Verbal communication<br>Non-verbal gesture/facial expression( <i>describe</i> )<br><br>Written aids<br>Pictorial aids<br>Other communication aid ( <i>describe</i> ) | Typing/writing<br>Reading ( <i>describe</i> )<br><br>Texting (mobile phone)<br>Listening to radio/music<br>Watching TV<br>Internet use ( <i>describe</i> )<br><br>Word games with a partner<br>Other ( <i>describe</i> )<br><br><b>NON-FUNCTIONAL/ NON-PROPOSITIONAL LANGUAGE ACTIVITIES</b><br>Singing<br>Word games (alone)<br>Language apps (alone)<br>Copying written letters, words, sentences (alone).<br><br><b>OTHER</b><br>Talking to observer<br>Talking to self: appropriate/inappropriate ( <i>describe</i> ) |          |



## Appendix B. Patient interview guide

**Investigating Communication Enhanced Environments after stroke**  
**Patient Interview guide, version 1\_11-8-15**

Tell me about what kind of activities you do while you are here (in hospital).

Describe your experience of communicating with people on the ward.

What makes it easier to communicate with people on the ward?

What makes it hard to communicate with people on the ward?

What can we do to make communicating with people easier?

For peer review only

1 Appendix C. Staff focus group guide.  
2  
3

4 **Investigating Communication Enhanced Environments after stroke**  
5 **Staff focus group guide, version 1\_27-7-15**  
6  
7

8  
9 STAFF FOCUS GROUP GUIDE BASELINE PHASE

10 What kind of language activities or language tasks do stroke patients currently participate in on the ward?

11 What kind of language activities or language tasks would you like see stroke patients have access to on the wards?

12 Describe your experience of communicating with stroke patients at the moment.

13 Can you tell me about anything that facilitates your ability to communicate with stroke patients on the ward?

14 Can you tell me about any barriers you experience that impact your ability to communicate with stroke patients on  
15 the ward?

16 What changes would you like to see to enhance communication between staff and stroke patients on the ward?

17 What changes would you like to see to enhance communication between visitors and stroke patients on the ward?

18 How could we enhance or optimise communication and language tasks and activities for stroke patients on the  
19 ward?

20 What do you think a communication and language enhanced stroke ward environment might look like?  
21  
22

23 STAFF FOCUS GROUP GUIDE POST-IMPLEMENTATION PHASE

24 Describe your experience of communicating with stroke patients at the moment.

25 Can you tell me about any barriers you experience that impact your ability to communicate with stroke patients on  
26 the ward?

27 Describe the differences in the communication environment since implementing the model.

28 What changes did you see to enhance communication between staff and stroke patients on the ward?

29 What changes did you see to enhance communication between visitors and stroke patients on the ward?

30 What was it like to use the model?

31 How do you feel about the model?

32 Can you tell me about anything that helped you use the model with stroke patients on the ward?

33 Can you tell me about any barriers you experienced while implementing the model?

34 How can we improve the model?  
35  
36  
37  
38  
39  
40  
41  
42  
43  
44  
45  
46  
47  
48  
49  
50  
51  
52  
53  
54  
55  
56  
57  
58  
59  
60

**Communication Enhanced Environments after Stroke****Study procedure version 2\_23-02-16****BASELINE:**

*Staff recruitment:* The Chief Investigator will recruit staff participants through a verbal explanation of the study and the provision of the information sheets and written consent forms. Staff will be provided 48 hours to discuss the study and ask questions before consenting to participate. Staff interviews and focus groups will commence as staff participants are recruited. Staff will participate in a one-hour focus group or a one-hour semi-structured interview (in person or via telephone) to explore staff perceptions of environmental barriers and facilitators to language activity and communication on in-patient acute and rehabilitation wards.

*Patient recruitment:* All consecutively admitted stroke patients during the baseline period will be screened for eligibility to participate in the study. The hospital site investigators will identify potential stroke participants that meet the inclusion and exclusion criteria. Stroke participants with aphasia will be identified by the hospital speech pathology or medical team as having a diagnosis of aphasia (aphasia diagnosis will be confirmed via Western Aphasia Battery-Revised (WAB-R)<sup>1</sup> Aphasia Quotient score <93.7 during data collection). The site investigators will approach potential participants and gain verbal consent from the patient to be approached by a member of the research team and have their 3-point identification released to the research team. This will be documented in the patient's integrated medical progress notes. Once verbal consent has been gained and documented, the site investigators will email the Chief Investigator the patient alert proforma identifying the patient as meeting the inclusion/exclusion criteria. The research team will liaise with the medical team to confirm the potential stroke participant meets the inclusion criteria: (i) admitted to the in-patient rehabilitation stroke unit for recent stroke, (ii) are less than 21 days post stroke and during baseline phase or intervention phase, (iii) have the ability to provide informed consent as determined by the medical team iv) Glasgow Coma Scale<sup>2</sup> greater than 10 at the time of screening, (v) have an estimated length of stay greater than 14 days and (vi) have adequate English proficiency to participate in semi-structured interviews. Patients will be excluded if they (i) have uncorrected hearing or vision (for example hearing impairment without hearing aids, vision impairment without glasses), (ii) are not medically stable, (iii) have a documented diagnosis of major depression or (iv) have a documented history of dementia or significant cognitive decline, traumatic brain injury or previous aphasia at the time of admission for the acute event, (v) or are a participant in a research study that will influence this study's outcomes. Stroke participant recruitment will follow the stroke participant consent procedure (see document: SD\_Communication Enhanced Environments after Stroke consent procedure version 1\_3-2-15). A record of identifying participant details attached to patient codes will be kept at the hospital site in a locked filing cabinet. An email summary of the baseline assessment results will be sent to the hospital speech pathology generic email address. The patient will be identified by patient code and ward/room number. The hospital speech pathology team will write a summary of the assessment results in the patient's integrated medical progress notes.

**Patient data collection:** All recruited stroke participants will complete the NIH Stroke Scale<sup>3</sup> (by someone trained in using this tool) and the Montreal Cognitive Assessment (MoCA).<sup>4</sup> Participants with aphasia will also complete an assessment of aphasia, the WAB-R<sup>1</sup> and provide a personal narrative language sample on their reason for admission to confirm a diagnosis of aphasia. After patient recruitment has been completed, the Chief Investigator and/or trained medical team members will recruit the patient's family, friends and significant others to consent to video recording and observations of their interactions with stroke participants.

Observations of stroke participants will commence 1-3 days after obtaining written consent. Patients' behaviour will be observed by the Chief Investigator or a Research Assistant, and video recorded for a total of 12 hours to enable behaviour mapping of video data (see document: Observation\_protocol\_SD\_version 3\_23-02-16). Patients will be observed and video recorded for 4 hours per day on weekend day and two consecutive weekdays between 7am to 7pm. The observation periods will be grouped into 4-hour observation intervals (e.g. 7am-11am, 11am-3pm and 3pm-7pm). Each day the patient will be observed and video recorded for one observation interval. The participant will be observed and video recorded during a different observation interval each day to gain a general insight into the patients' activities (see Figure 1. below). Patients who do not consent to video recording will be provided with the option of audio recording and manual observation conducted by the researcher to enable the collection of case notes regarding patient behaviour. An observational protocol developed for this study will be used to measure the frequency stroke participants engage in language activities. These will be categorised into *solitary language activities* for example reading, writing, listening to the radio, use of iPad applications, and *interactive language activities* defined as i) an interaction involving an exchange of information, ii) with a communication partner including gesture and/or facial expression, reading, writing or drawing for the purpose of communication and use of technology including talking on the telephone. The observational protocol will be based on the behavioural mapping techniques of Janssen et al.<sup>5</sup> Stroke patients' solitary and interactive language activities will be recorded in 5-minute intervals and activity observed within the first minute of the observation interval will be recorded on a checklist of the predetermined behaviours. Semi-structured supported conversation interviews for stroke participants will be conducted within 5 days of the last observation. The interviews will explore stroke patients' perceptions of environmental barriers and facilitators to language activities and communication and their experience of communication on the acute and rehabilitation wards.

#### IMPLEMENTATION:

A model of a CEE will be implemented within the acute and rehabilitation wards. The model will be developed as part of the research project. We hypothesise that our model of CEE will include the provision of:

- i) CEE equipment, for example reading materials such as books and magazines, access to a computer with internet and access to a communal dining area,
- ii) CEE education, support and training for staff, patients and their family, friends and significant others with the aim to develop the ability to support and facilitate 'language activity' and 'communication activity' for patients after stroke. This will be accessible via multiple modalities including one-on-one training and group training sessions, as

well as through the provision of video and written resources. A questionnaire will be administered pre and post training in order to determine staffs' perceptions of changes in their knowledge, skills and attitude towards communication and aphasia. Additionally, feedback regarding the content and format of the training program will be obtained through questionnaires administered after the completion of the training program. Training and support provided in the implementation phase will be continued until the end of the intervention phase.

#### POST-IMPLEMENTATION:

Staff participant semi-structured interviews and focus groups will be conducted. Staff will participate in a one-hour semi-structured interview or a one-hour focus group to explore staff perceptions of environmental barriers and facilitators to language activities and communication.

The procedures for participant recruitment and data collection during the post-implementation phase will replicate those used in the baseline phase.

There is no travel commitment for all participants as all data collection and training will be conducted at the hospital.

| Observation interval | Observation time | Day 1: Sunday | Day 2: Monday | Day 3: Tuesday |
|----------------------|------------------|---------------|---------------|----------------|
| 1                    | 7am-8am          | PWA1<br>PWOA1 | PWA3<br>PWOA3 | PWA2<br>PWOA2  |
|                      | 8am-9am          |               |               |                |
|                      | 9am-10am         |               |               |                |
|                      | 10am-11am        |               |               |                |
| 2                    | 11am-12pm        | PWA2<br>PWOA2 | PWA1<br>PWOA1 | PWOA<br>PWOA3  |
|                      | 12pm-1pm         |               |               |                |
|                      | 1pm-2pm          |               |               |                |
|                      | 2pm-3pm          |               |               |                |
| 3                    | 3pm-4pm          | PWA3<br>PWOA3 | PWA2<br>PWOA2 | PWA1<br>PWOA1  |
|                      | 4pm-5pm          |               |               |                |
|                      | 5pm-6pm          |               |               |                |
|                      | 6pm-7pm          |               |               |                |

Figure 1. CEE Observation schedule

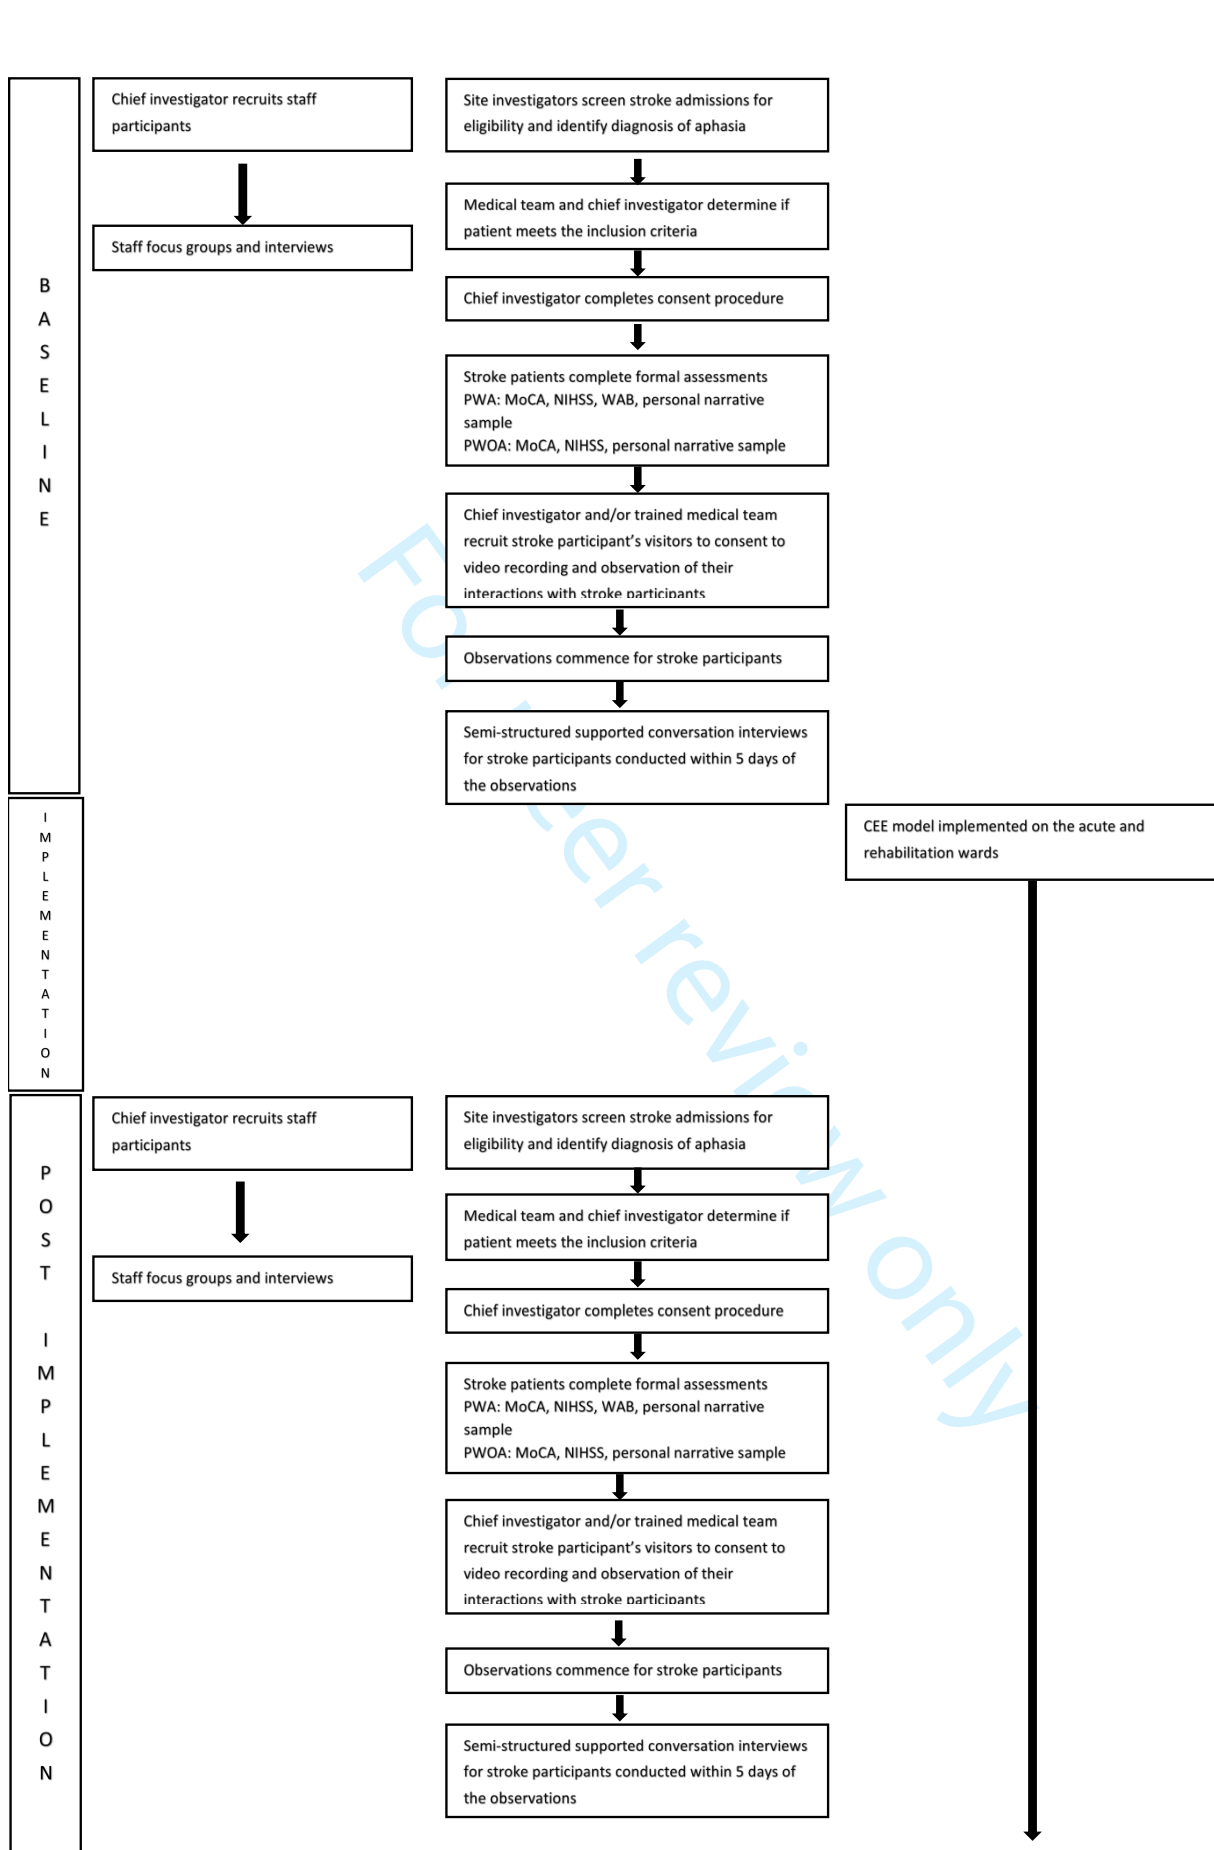

Figure 2. Study flow diagram

## References

1. Kertesz A. Western Aphasia Battery- Revised. San Antonio, TX, Harcourt Assessment; 2006.
2. Teasdale G, Jennett B. Assessment of coma and impaired consciousness. A practical scale. *Lancet*. 1974;2(7872): 81–4.
3. NIH stroke scale [Internet]. Bethesda, Md, National Institute of Neurological Disorders and Stroke (U.S.). 2011 [cited 2016 Feb 10]. Available from [https://www.ninds.nih.gov/sites/default/files/NIH\\_Stroke\\_Scale.pdf](https://www.ninds.nih.gov/sites/default/files/NIH_Stroke_Scale.pdf)
4. Nasreddine ZS, Phillips NA, Bédirian V, et al. The Montreal Cognitive Assessment, MoCA: A brief screening tool for mild cognitive impairment. *J Am Geriatr Soc*. 2005;53(4); 695-9.
5. Janssen H, Ada L, Bernhardt J, et al. An enriched environment increases activity in stroke patients undergoing rehabilitation in a mixed rehabilitation unit: A pilot non-randomized controlled trial. *Disabil Rehab*, 2014; 36(3), 255–262. doi: 10.3109/09638288.2013.788218

## Communication Enhanced Environments after Stroke consent procedure

### Version 1\_3-2-15

#### Stroke participants

The following consenting procedure will be used for all participants who are identified as potential research participants. Recruitment will only be completed by the Chief Investigator.

1. Check the stroke participant meets the inclusion criteria and exclusion criteria.
2. Read the participant information sheet to the participant. Use the pictures on the participant consent form to support the patient's comprehension of verbal information. Use gesture, written and pictorial support to facilitate verbal communication as required.
3. Provide the person responsible with the person responsible information sheet and consent form.
4. Provide time for the stroke patient and the person responsible to discuss the study and ask questions to their satisfaction.
5. Ask the stroke participant if they consent to the study using simple closed questions (e.g. "Do you understand what the study is about?", "Do you have any questions about the study?", "Do you want to be in the study?", "Will you sign the form?"). Use multi-modal communication strategies and repeat information/questions as required. Use the pictures on the participant consent form to support patient comprehension of verbal information.
6. If the stroke patient agrees to participate in the study, ensure they sign the consent form witnessed by someone independent of the study.
7. Provide the stroke participant with a copy of the information sheet and consent form for their own records.
8. Add the participant study number to the consent form
9. Store the signed consent forms in a locked cabinet at the hospital site. This cabinet will only be accessible by the research investigators.



## Investigating Communication Enhanced Environments after stroke

### Observation Protocol version 3\_23-2-16

During the baseline and intervention period, patients' behaviour will be observed and video recorded for a total of 12 hours. Patients who do not consent to video recording will be provided with the option of audio recording and manual observation. This will enable the collection of relevant notes about factors that might influence the interactions that may not be captured in the video or behavioural mapping, for example the context of the interactions or details about the environment.

Patients will be manually observed and video recorded for four hours per day on two weekdays and one weekend day between 7am to 7pm. The observations will be grouped into three x 4-hour observation intervals (e.g. 7am-11am, 11am-3pm, 3pm-7pm). Each day the patient will be observed and video recorded for one of the 4-hour observation intervals. The 4-hour observation period will be split into 5-minute intervals. All language and communication activity observed within the first minute of the 5-minute interval will be recorded on the behavioural mapping sheet with predetermined behaviours (Appendix 1). The free smart phone app 'Impetus' can be used to time 1-minute observations. You can set the timer to vibrate briefly when the 1-minute observation interval begins and ends.

Observation times (see Figure 1.) will be randomly selected by drawing out of an envelope. This will be conducted by the primary investigator prior to commencing patient observations. It may not be possible to observe the patient during the planned observation time, for example as a result of scheduled testing or home visits. If this occurs, patients can be observed during the next available observation interval. Changing or modifying the observation schedule should be avoided where possible.

| Observation interval | Observation time | Day 1: Sunday | Day 2: Monday | Day 3: Tuesday |
|----------------------|------------------|---------------|---------------|----------------|
| 1                    | 7am-8am          | *PWA1         | PWA3          | PWA2           |
|                      | 8am-9am          | **PWOA1       | PWOA3         | PWOA2          |
|                      | 9am-10am         |               |               |                |
|                      | 10am-11am        |               |               |                |
| 2                    | 11am-12pm        | PWA2          | PWA1          | PWA3           |
|                      | 12pm-1pm         | PWOA2         | PWOA1         | PWOA3          |
|                      | 1pm-2pm          |               |               |                |
|                      | 2pm-3pm          |               |               |                |
| 3                    | 3pm-4pm          | PWA3          | PWA2          | PWA1           |
|                      | 4pm-5pm          | PWOA3         | PWOA2         | PWOA1          |
|                      | 5pm-6pm          |               |               |                |
|                      | 6pm-7pm          |               |               |                |

Figure 1. Observation schedule

\*PWA: stroke patient with aphasia

\*\*PWOA: stroke patient without aphasia

## DISCOURSE SAMPLE

You must collect a personal narrative discourse sample for each participant at the beginning of the first observation. Once you have set up the video camera and have started recording, ask the patient “what has brought you into hospital?”. Once the patient has finished telling you their personal narrative, tell the patient you will now start the observations.

## VIDEO RECORDING SET-UP

Place the video camera facing the patient approximately 1-2 metres away from them. Ensure the camera is placed in an area where it is unlikely to be moved for the duration of the observation time (for example at the end of the patient’s bed). Ensure the camera frame is capturing the patient as well as their surroundings (e.g. potential communication partners, visitors, etc). If the patient relocates, reposition the camera to ensure the patient and their surroundings remain in frame. Observe and manually record the patient’s behaviour and their environment according to the procedure for behavioural mapping.

Do not record the patient in the bathroom or shower or during any other inappropriate circumstances (this may include sensitive conversations, culturally sensitive situations or if the patient requests). If the patient indicates that they don’t want to be recorded or becomes agitated, upset or distressed, use the ‘withdrawal from observations visual resource’ (if appropriate) and ask the patient:

1. Do they want you to stop video recording?
2. Do they want to be manually observed and audio recorded instead?  
If the patient responds ‘no’, ask the patient-
3. Can you come back another time to observe them?

If the patient asks you to stop recording you must cease recording immediately. The patient may allow you to continue with manual observations or come back another time to complete the observations. If the patient allows you to complete manual observations and audio recording, follow the audio-recording set-up and protocol below.

## AUDIO RECORDING SET-UP AND PROTOCOL

This protocol is to be followed if the patient or their family indicate they do not want to be video recorded however agree to audio recording and manual observations. Place the cap on the video camera and continue recording in order to capture audio. If using a battery-operated audio recorder, place it on a table close to the patient (within 1

1 metre). Ensure the audio recorder is placed in a location where it will not be touched or moved throughout the  
2 observation time. Observe and manually record the patient's behaviour and their environment according to the  
3 procedure for behavioural mapping. Ensure spare batteries for the audio recorder are available if required.  
4  
5  
6  
7

## 8 **COMMUNICATION PARTNERS AND VISITORS**

9  
10 Take note of all communication partners and visitors who have provided consent to video recording and/or  
11 observations of their patient interactions. If someone enters the room during recording politely interrupt the  
12 interaction, introduce yourself and inform the person that the patient is being video recorder recorded as a part of  
13 the study the patient has agreed to participate in. Ask the visitor if they would like to go out of the room with the  
14 researcher to find out about the study and the video recording. Provide a verbal explanation of the study and  
15 provide the 'Visitors/communication partners' information and consent form'. Offer the visitor the option of no  
16 video or manual recoding during their interaction with the patient. If the person chooses not to participate in  
17 manual or video observations inform the person that any incidental recordings of them will be deleted and will not  
18 be included in the study. The researcher will step out of the room for the duration of their visit.  
19  
20  
21  
22  
23  
24  
25  
26  
27

## 28 **PROCEDURE FOR BEHAVIOURAL MAPPING**

- 29 • Position self where the patient can be clearly observed
- 30 • Remain inconspicuous as possible
- 31 • Circle ALL appropriate components on the observation schedule in regards to location, activity, people  
32 present and details of language and communication observed within the first minute of each five-minute  
33 interval.
- 34 • You can circle more than one key per section if required (except for location).
- 35 • If you require a toilet break, leave the camera recording while you take a break. If you miss a 1-minute  
36 observation, place a line through the observation interval on the behavioural mapping sheet and write  
37 'unobserved-toilet break'.  
38  
39  
40  
41  
42  
43  
44  
45  
46  
47

## 48 **TIME**

- 49 • Write the time at the beginning of the 1-minute observation interval

## 52 **LOCATION**

- 53 • Circle only one location
- 54 • If the patient is moving between two locations, circle the location the patient is moving towards

55 AMENITIES: Toilet, shower.

56 BEDROOM: Around the patient's room or bed. If the patient is outside of their doorway this is considered 'hall'.  
57  
58  
59  
60

1 HALL: Any hallway within the hospital ward.

2 THERAPY AREA: In an allied health therapy session, including occupational therapy, physiotherapy, speech  
3 pathology, nursing.

4 FAMILY MEETING ROOM: Family meeting room.

5 DOCTOR'S ROOM: Doctor's office.

6 DINING ROOM: Dining room during meal times or any other time.

7 COMMUNAL AREA: Communal dining area.

8 OUTSIDE: Outside areas including the garden, car park.

9 OFF UNIT: Off-site locations, home visits, testing off site.

10 OTHER: Anything that doesn't fit into the above categories-provide description of location.

## 11 PEOPLE PRESENT

12 People present include any person that is near the patient and is able to have an interaction with the patient. If you  
13 do not know how to classify the person make a note to check with staff at a later time and complete the observation  
14 schedule.

15 **Exceptions:** People who are near the patient but are unable to interact with the patient, e.g. cognitive or behavioural  
16 issues, barriers between person and the patient preventing them from interacting- e.g. curtain drawn, people in the  
17 way. If an interaction is occurring despite objects in the way, the communication partner is considered as a 'person  
18 present'.

19 PEOPLE PRESENT: Nurse, nurse assistant, doctor, physio (physiotherapist), OT (occupational therapist), SP (speech  
20 pathologist), DT (dietician), SW (social worker), family/friend, other patient, alone (no-one present that is conducive  
21 to interactions), other (describe).

## 22 ACTIVITIES

23 UNOBSERVED: If you are unable to observe the patient. Place a line through the observation  
24 interval and write unobserved.

25 NO LANGUAGE ACTIVITY: If the patient is observed not engaged in any communication activity.

- 26 • Circle 'no activity' on the checklist
- 27 • Write what the patient is doing, e.g. 'sleeping'

28 INTERACTIVE LANGUAGE ACTIVITIES: Defined as an interaction involving an immediate communicative exchange  
29 with a communication partner. Interactive language activities may include talking, gesture and/or facial expression,  
30 reading, writing or drawing for the purpose of communication, use of communication aids or AAC devices and use of  
31 technology including talking on the telephone. Non-verbal gesture or facial expression includes eye contact to  
32

1 initiate interactions, hand gestures (e.g. waving, thumbs up), body movements for the purpose of conveying a  
2 communicative message (e.g. shrugging) and/or facial expressions for the purpose of communication.

3 Communication aids or AAC devices includes any use of alternative and augmentative devices for the purpose of  
4 communication, e.g. high-tech or low-tech AAC devices such as letter boards, pictures/photos, whiteboard, writing  
5 or drawing, smart phones, iPad. Please describe communication aids observed.  
6  
7

8  
9 OTHER FUNCTIONAL COMMUNICATION ACTIVITIES: All other communication activities that do not involve a direct  
10 immediate communicative exchange with a communication partner. Functional communication activity may include  
11 reading, typing/writing, emailing, internet use, watching TV, listening to talking on the radio. Note the patient must  
12 be looking directly at the TV to be considered 'watching TV'. If the TV is on in the background, do not include this as  
13 'watching TV'.  
14  
15

16  
17 NON-FUNCTIONAL/NON-PROPOSITIONAL LANGUAGE ACTIVITIES: Singing, word games (carried out alone), language  
18 apps (used alone), copying written letters, words or sentences (carried out alone).  
19  
20

21 OTHER: Communication or language activities that do not fit the criteria of interactive language activity, 'other'  
22 functional communication activities, non-functional/non-propositional language activities or may be a confounding  
23 variable (for example, talking to self and talking to the observer). If a patient is talking to themselves, note if this is  
24 appropriate (for example, saying 'excuse me' after burping) or inappropriate (for example, an extensive monologue)  
25 and describe the context. If the patient's verbal output is inaudible, write this in the space underneath 'talking to  
26 self'.  
27  
28  
29  
30  
31

32 **Note:** If the patient is using a computer, phone, smart device, or iPad where the activity they are engaged in (e.g.  
33 texting, emailing, playing a game, etc) cannot be accurately determined, note this in the comments section. After the  
34 1-minute observation interval has been completed ask the patient if they mind sharing if what activity they were  
35 completing on their device and record this in the relevant section. If the patient does not wish to share this  
36 information with you, record this in the 'other' section.  
37  
38  
39  
40

#### 41 COMMENTS

42 Describe the context of the interactions or details about the environment in the comments section. This will provide  
43 information regarding factors that may influence the interactions, for example 'background noise'. Additionally,  
44 write down any information that may be missed in the video data, for example, people out of the camera frame,  
45 interactions that may be overheard in the room that might impact on the current interactions.  
46  
47  
48  
49

50 Draw a line under the final comment after the one-minute observation had been completed. Write any additional  
51 observations within the final 4 minutes below this line (see example).  
52  
53  
54  
55

56 If you have any queries or questions regarding this observation protocol or the observation protocol please contact  
57 chief investigator Sarah D'Souza.  
58  
59  
60

# Stroke participant information and consent form

## Communication activity in hospital

This research project is being undertaken as **part of the requirements** of a **PhD at Edith Cowan University**.

### Researchers' contact details

| <b>Edith Cowan University</b>                                                                   |                                        |                  |
|-------------------------------------------------------------------------------------------------|----------------------------------------|------------------|
| <b>Chief Investigator/</b><br>PhD student                                                       | <b>Sarah D'Souza</b>                   | Ph: 0439 982 451 |
| Principal Supervisor                                                                            | Professor Beth<br>Armstrong            | Ph: 08 6304 2769 |
| Co-Supervisor                                                                                   | Associate Professor<br>Natalie Ciccone | Ph: 08 6304 2047 |
| Co-Supervisor                                                                                   | Associate Professor<br>Erin Godecke    | Ph: 08 6304 5901 |
| Co-Supervisor                                                                                   | Associate Professor<br>Deborah Hersh   | Ph: 08 6304 2563 |
| <b>Hunter Stroke Service, University of Newcastle and Hunter<br/>Medical Research Institute</b> |                                        |                  |
| Adjunct Supervisor                                                                              | Dr Heidi Janssen                       | Ph: 02 40420417  |

1 You are **invited** to participate in a research project. Sarah D'Souza, a  
2 speech pathologist and PhD student is leading the study as Chief  
3 Investigator. This study has received ethical **approval** from **ECU** Human  
4 Research **Ethics Committee** and the Hollywood Private Hospital  
5 Research Ethics Committee.  
6  
7  
8  
9

10  
11  
12  
13  
14 This project is investigating the **hospital environment** to see how this  
15 **influences** patient **communication activity**. Communication activity  
16 involves communication, such as **talking** with other patients,  
17 **socialising**, **reading** the paper, using the **telephone**, talking to staff, or  
18 engaging in group activities including **therapy**.  
19  
20  
21  
22  
23  
24

25  
26  
27 **You** have been **selected** to participate as you have had a **stroke** and  
28 are receiving **treatment at Hollywood Private Hospital**. We are  
29 **interested** in seeing **how** the hospital **surroundings affect what you**  
30 **do** throughout the day.  
31  
32  
33  
34  
35  
36

### 37 **What would you have to do?**

38  
39  
40 You will be **asked** to provide **consent** to **agree to participate** in the  
41 study.  
42  
43  
44

45 You will be **asked to consent** to:  
46  
47  
48  
49  
50

- 51 • Complete **three tests** to see how your stroke has affected **you**  
52 including your **language, concentration** and **memory**. These tests  
53 will be conducted at the **beginning of the project**. The tests will take  
54 approximately **1 hour** to complete with an option to complete the tests  
55  
56  
57  
58  
59  
60

1 over **two separate 30 minute sessions** and with as many **breaks** as  
2 you may need.  
3  
4  
5

- 6  
7  
8 • A **researcher** spending approximately **1 hour discussing with you**  
9 your **opinion** regarding **how** your rehabilitation **surroundings affect**  
10 **your stay in hospital** and **your communication activity** levels.  
11  
12  
13  
14  
15  
16 • A researcher **video recording, observing** and **writing down** what is  
17 happening in your **environment** including **your activities**. You will be  
18 observed and recorded for a total of **12 hours** over **3 days**.  
19  
20  
21  
22  
23  
24

25  
26 You may **not want** to be **video recorded**. If you **request**, you will  
27 **not** be **video recorded**. You can ask not to be video recorded at **any**  
28 **time**. In this case the researcher will **only observe, audio record**  
29 and **write down** what is **happening in your** environment **including**  
30 your activities.  
31  
32  
33  
34  
35  
36  
37  
38  
39

- 40 • A researcher **looking at your hospital medical file** to collect  
41 **information** regarding:  
42  
43  
44 • Your **details** (such as your age, your living arrangements, your  
45 occupation and your level of functioning before your stroke)  
46  
47  
48 • Any **conditions** or **diseases** you may have  
49  
50  
51 • Information about your **stroke** (for example when it happened, the  
52 **area** of the **brain** affected, how it has **affected your functioning**  
53 and **abilities**)  
54  
55  
56 • Details about **how long** you have **been in hospital** since your  
57 stroke  
58  
59  
60



1  
2  
3 If you decide to participate in this study, you **will not miss out** on any  
4 **treatment**. Participation will **not cost** you **anything** and **after**  
5  
6  
7 completing the **tests** and the **interview** you will be asked to continue  
8  
9 participating in your **normal activities**.  
10  
11  
12  
13  
14

15 We will **not record** if you are **behind closed curtains** or completing  
16  
17 sensitive tasks such as when you are in the **toilet** or **shower**.  
18  
19  
20  
21  
22

23 We may use the **recordings** of **you** to make a **training package**  
24  
25 (including a video). You can have **your face blurred out** if you want. If  
26  
27 you **do not want** to be in the training package we will **not include you**  
28  
29 in the training package or video.  
30  
31  
32  
33  
34

35 Your hospital **discharge** will **not be affected** because you are in this  
36  
37 study. **You** will be **discharged** from hospital when the hospital **medical**  
38  
39 **team decides** that you are **ready**.  
40  
41  
42  
43

44 There are **no known risks** of participating in this study. If you feel  
45  
46 uncomfortable at any time, you are free to **tell the researcher** and  
47  
48 **observations** within your room will **stop immediately**. You may  
49  
50 become **upset** during the **tests** or the **interview**. If this happens you  
51  
52 can **ask** to take a **break or stop** the interview.  
53  
54  
55  
56

57 There will be **no immediate benefit** to you from participating in this  
58  
59 research; however your participation will allow the collection of  
60

1 information that may **help improve** stroke **hospital wards** which may  
2 **benefit** future stroke survivors.  
3  
4  
5

6 **Participating** in this study is completely **voluntary**. You **do not have**  
7 **to** participate if you don't want to. If you decide to participate you may  
8 **withdraw** at **any time** without giving a reason and withdrawing **will not**  
9 **disadvantage** you in any way and will **not affect** your hospital  
10 **treatment**. If you **decide** that you do **not want to participate** in the  
11 study, you **can ask to remove** all of your **information** from the study.  
12  
13  
14  
15  
16  
17  
18  
19  
20  
21

22 All the **information** you give will be **confidential**. You will **not be**  
23 **identified** by name. You will be **assigned** a unique **code** and any  
24 information that may reveal your **identity** will be **removed**.  
25  
26  
27  
28

29 All personal health information will be accessed, used and stored in  
30 accordance with Commonwealth Privacy Laws. **Information** from all the  
31 people in the study is **combined** and **summarised**.  
32  
33  
34  
35  
36  
37  
38

39 We will **store** all your electronic **information** on a **password locked**  
40 **computer** and **password locked hard drive only accessible by the**  
41 **Chief Investigator**. Your hard copy information will be **kept** in a **locked**  
42 **cabinet** at Edith Cowan University. Your information will **only** be  
43 **accessible to researchers** named on **this study**.  
44  
45  
46  
47  
48  
49  
50  
51  
52

53 The **results** of this study may be **published** in research **journals** or  
54 presented at **conferences**. Your **name** will **not** be **used**.  
55  
56  
57  
58  
59  
60

1 **Data** may be **used** in higher degree by **research studies** in the **future**.  
2 **Confidentiality** will be **maintained** and no identifying information will  
3 be used.  
4  
5  
6  
7  
8  
9

10 **Data** will be **accessible by researchers** through data sharing archives.  
11 This data will be governed by an overarching body to ensure data is **only**  
12 **used for approved research** purposes. Researchers who access this  
13 data from the data bank will not have access to participant information  
14 and therefore **will not know your identity**.  
15  
16  
17  
18  
19  
20  
21  
22  
23

24 **Read** this information and be sure you **understand** its content **before**  
25 you **agree** to participate in this study.  
26  
27  
28  
29  
30  
31

32 If **you** would **like** to **participate** in this study, please **sign the form**  
33 below and **return** it to a **staff** member or a member of the **research**  
34 **team**.  
35  
36  
37  
38  
39  
40

#### 41 **Questions or further information?**

42 You **may wish** to **discuss** this information with your **doctor, a relative**  
43 **or friend before agreeing** to take part in this study.  
44  
45  
46  
47  
48  
49

50 If you are interested in participating, please tell the researchers. If you  
51 have any questions or require any further information about the research  
52 project, please contact: Sarah D'Souza [Ph: 0439 982 451].  
53  
54  
55  
56  
57  
58  
59  
60

1 Thank you for considering the invitation to take part in this research  
2 project.  
3  
4  
5  
6

7 Yours sincerely,  
8  
9

10  
11  
12 Sarah D'Souza  
13  
14  
15  
16  
17

18 If you have any **concerns or complaints** about the research project and wish to **talk to an**  
19 **independent person**, you may contact:  
20  
21

22 **Kim Gifkins**  
23

24 **Senior Research Ethics Advisor**  
25

26 Edith Cowan University  
27

28 270 Joondalup Drive  
29

30 JOONDALUP WA 6027  
31

32 Phone: **(08) 6304 2170**  
33

34 Email: [research.ethics@ecu.edu.au](mailto:research.ethics@ecu.edu.au)  
35  
36  
37  
38  
39  
40

41 This project has been approved by the ECU Human Research Ethics Committee and the  
42 Hollywood Private Hospital Research Ethics Committee.  
43  
44  
45  
46  
47  
48  
49  
50  
51  
52  
53  
54  
55  
56  
57  
58  
59  
60

**You** have been **asked to participate** in a **research** study.

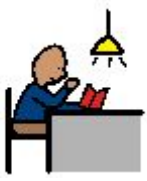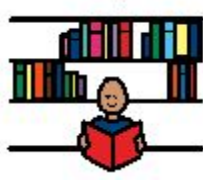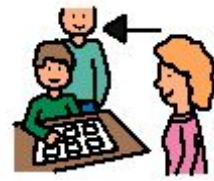

A researcher will **record you** with a **tape recorder** or a video **camera**, **watch** and **write down** what is happening in your **environment** including **your activities**.

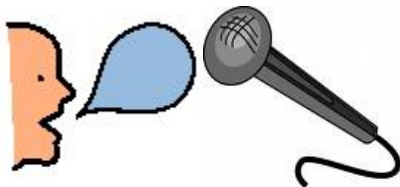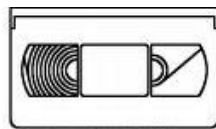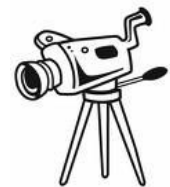

1 A **researcher** will **discuss** with you **your opinion** regarding **how** your  
 2 hospital **surroundings** affect **your stay in hospital** and **your**  
 3 **communication activity levels**.  
 4  
 5  
 6  
 7  
 8  
 9

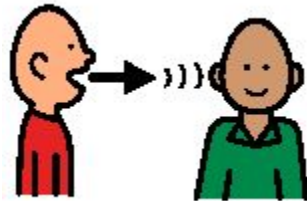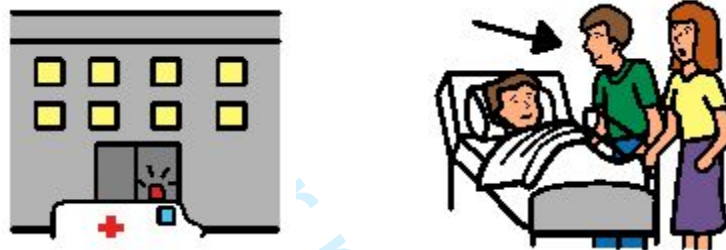

10  
 11  
 12  
 13  
 14  
 15  
 16  
 17  
 18  
 19  
 20  
 21  
 22  
 23  
 24  
 25  
 26  
 27  
 28  
 29  
 30  
 31  
 32  
 33  
 34  
 35  
 36  
 37  
 38  
 39  
 40 Your **name** and **personal details** will be kept **private**.  
 41  
 42  
 43  
 44  
 45  
 46  
 47  
 48  
 49  
 50  
 51  
 52  
 53  
 54  
 55  
 56  
 57  
 58  
 59  
 60

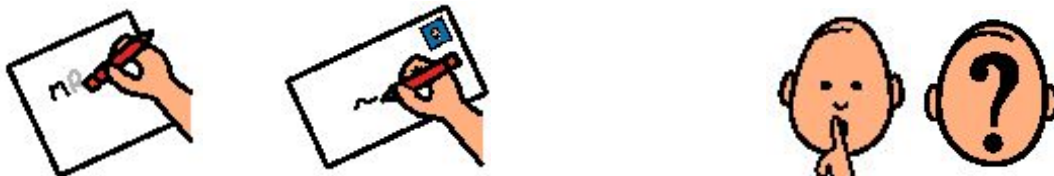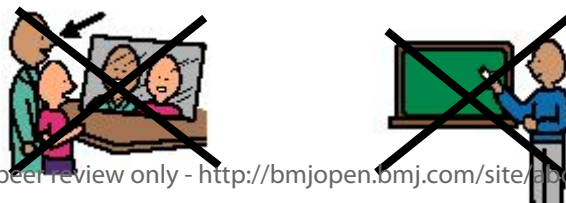

1  
2  
3 You can **say no at any time.**  
4  
5  
6  
7

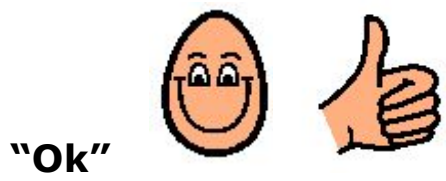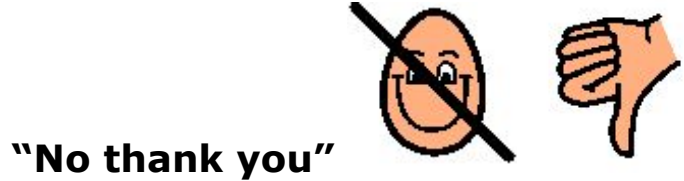

15  
16  
17  
18  
19  
20  
21  
22  
23  
24  
25  
26  
27  
28  
29  
30  
31  
32 We may use the **recordings** of **you** to make a **training package**  
33 (including a video).  
34  
35  
36

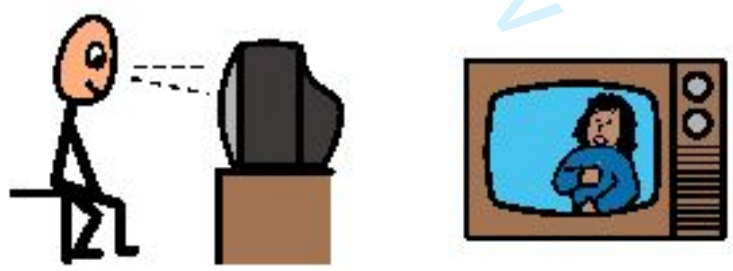

1 You can have **your face blurred out** if you want.  
2  
3  
4  
5

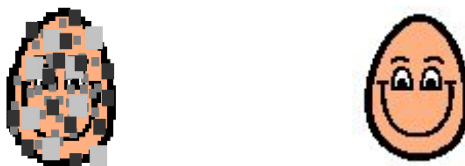

18 If you **do not want** to be in the training package we will **not include**  
19 **you** in the training package or video.  
20  
21

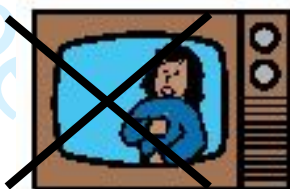

40 I **agree to take part** in the above research project and give my **consent**  
41 **freely**.  
42  
43  
44  
45  
46  
47  
48  
49  
50  
51  
52  
53  
54  
55  
56  
57  
58  
59  
60

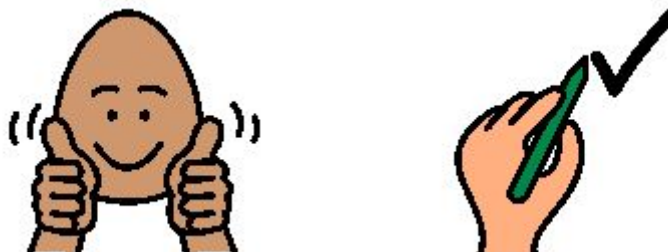



I have been **given a copy** of the **Information Statement** and I understand that the **project** will be **carried out** as **explained**.

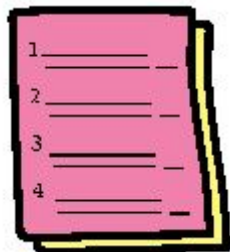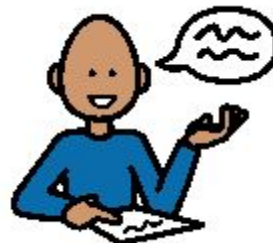

I understand and agree to:

- Complete **three tests** to assess how the stroke has affected **me**, my **language, concentration** and **memory**, at the **beginning of the project**.

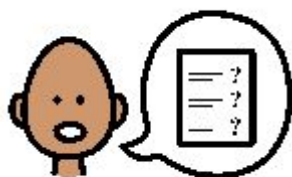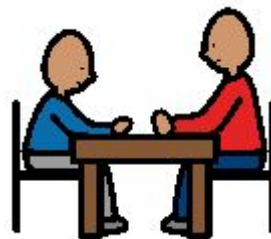

- A **researcher** spending approximately **1 hour discussing** with me my opinion regarding how my hospital **environment affects** my stay in hospital and **what I do**.

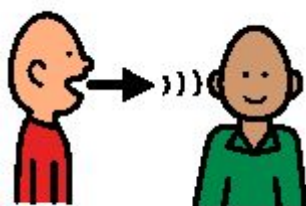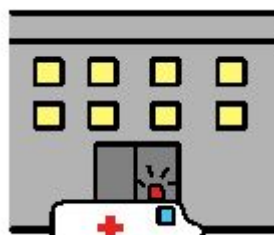

- 1  
2  
3  
4  
5  
6 • A researcher **video recording, observing** and **writing down** what is  
7 happening in my **environment** including **my activities**.  
8  
9

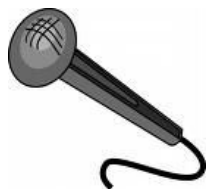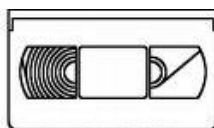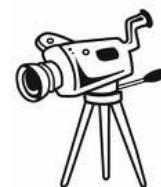

- 26 • A researcher **looking at my hospital medical file** to collect  
27 **information** for the study.  
28  
29

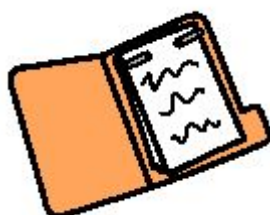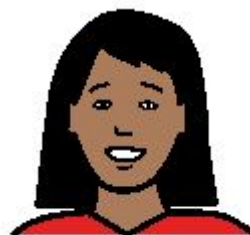

43 I **understand** that **my identity, personal information** and **data** will  
44 remain **confidential**.  
45  
46  
47  
48  
49  
50

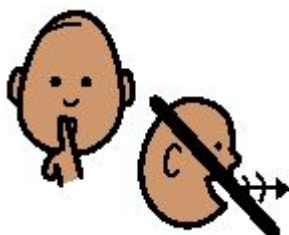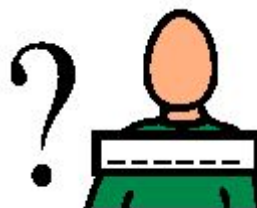

1  
2  
3  
4  
5  
6  
7  
8  
9  
10  
11  
12  
13  
14  
15  
16  
17  
18  
19  
20  
21  
22  
23  
24  
25  
26  
27  
28  
29  
30  
31  
32  
33  
34  
35  
36  
37  
38  
39  
40  
41  
42  
43  
44  
45  
46  
47  
48  
49  
50  
51  
52  
53  
54  
55  
56  
57  
58  
59  
60

I have had the **opportunity** to **ask questions** about the study and am **satisfied** with the **responses** that have been provided.

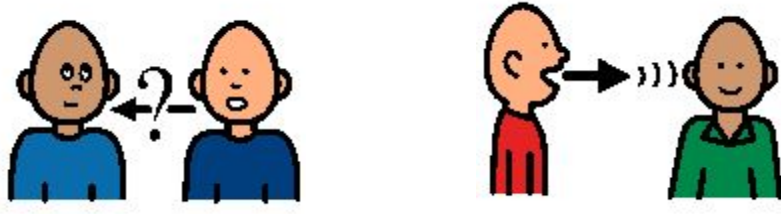

or peer review only

1 **Would you like to be involved?** **Yes** **No**

2  
3  
4  
5  
6 I **agree** to the **recordings** of me **Yes** **No**  
7  
8 to make a **training package**  
9  
10 **(including a video).**

11  
12  
13  
14  
15 I would like **my face blurred** out. **Yes** **No**

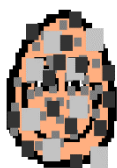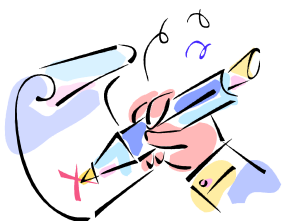

16  
17  
18  
19  
20  
21  
22  
23  
24  
25  
26  
27  
28  
29  
30  
31  
32  
33  
34  
35  
36 **Your Signature**

37  
38 **Signature:** \_\_\_\_\_

39  
40  
41 **Print name:** \_\_\_\_\_

42  
43  
44 **Date:** \_\_\_\_\_

45  
46  
47  
48  
49  
50  
51 **Witness** **Signature:** \_\_\_\_\_

52  
53  
54 **Print name:** \_\_\_\_\_

55  
56  
57  
58  
59 **Date:** \_\_\_\_\_

**Person responsible information sheet**  
**Stroke patients' communication activity in hospital**

This research project is being undertaken as part of the requirements of a PhD at Edith Cowan University.

Researchers' contact details

| Edith Cowan University                                                               |                                         |                  |
|--------------------------------------------------------------------------------------|-----------------------------------------|------------------|
| Chief Investigator/<br>PhD student                                                   | Sarah D'Souza                           | Ph: 0439 982 451 |
| Principal Supervisor                                                                 | Professor Beth Armstrong                | Ph: 08 6304 2769 |
| Co-Supervisor                                                                        | Associate Professor Natalie<br>Ciccione | Ph: 08 6304 2047 |
| Co-Supervisor                                                                        | Associate Professor Erin<br>Godecke     | Ph: 08 6304 5901 |
| Co-Supervisor                                                                        | Associate Professor Deborah<br>Hersh    | Ph: 08 6304 2563 |
| Hunter Stroke Service, University of Newcastle and Hunter Medical Research Institute |                                         |                  |
| Adjunct Supervisor                                                                   | Dr Heidi Janssen                        | Ph: 02 40420417  |

The participant is invited to take part in a research project. Sarah D'Souza, a Speech Pathologist and PhD student, is leading the study as Chief Investigator. This study has received ethical approval from ECU Human Research Ethics Committee and Hollywood Private Hospital Research Ethics Committee.

This project is investigating the hospital environment to see how this influences patient activity.

The participant has been selected to take part in this study as they have had a stroke and are receiving treatment at Hollywood Private Hospital. We are interested in

1 seeing how the hospital surroundings affect their communication activity throughout  
2 the day. Communication activity involves communication, such as talking with other  
3 patients, socialising, reading the paper, using the telephone, talking to staff, or  
4 engaging group activities including therapy.  
5  
6  
7  
8

9 This information sheet will explain the research project and will detail what is involved in the  
10 study. You will be given a copy of this information to keep for your reference.  
11  
12  
13  
14

15 Please read through all of the information carefully. You can ask the researcher questions  
16 about the study at any time.  
17  
18  
19  
20  
21

## 22 **Purpose of the research**

23  
24 Little is known about the impact of the hospital rehabilitation environment on patient  
25 communication activity levels during stroke recovery. This study will investigate how the  
26 hospital stroke ward environment influences patient communication activity levels. The  
27 information gathered from this study will assist in improving the Hollywood Private Hospital  
28 stroke ward environment to help the recovery of stroke survivors in the future.  
29  
30  
31  
32  
33  
34  
35

## 36 **What does the stroke patient have to do?**

- 37  
38  
39  
40 • Complete three tests and a recording of them talking to see how their stroke has  
41 affected their functioning including their language, concentration and memory. These  
42 tests will be conducted at the beginning of the project. The tests will take  
43 approximately 1 hour to complete with an option to complete the tests over two  
44 separate 30 minute sessions and with as many breaks as the participant needs.  
45  
46  
47  
48
- 49  
50  
51 • Spend approximately 1 hour discussing with the researcher their opinion regarding how  
52 their rehabilitation surroundings affect their stay in hospital and activity levels.  
53  
54  
55
- 56  
57 • Allow the researcher to video record, observe and write down what is happening in the  
58 participant's environment including their activities for a total of 12 hours over a 3 day  
59 period. Video recording is a useful way of capturing the details of everyday activities on  
60

1 the ward. Often, people forget that the camera is there. Obviously, personal or private  
2 activity such as toileting would not be filmed. The participant may not want to be video  
3 recorded. If they request, they will not be video recorded. In this case the researcher  
4 will only observe, audio record and write down what is happening in their environment  
5 including their activities.  
6  
7  
8  
9

- 10
- 11 • A researcher will look at the participant's hospital medical file to collect information  
12 regarding:  
13
    - 14 • The participant's details (such as their age, living arrangements, occupation and  
15 level of functioning before stroke)
    - 16 • Any relevant conditions or diseases the participant may have
    - 17 • Information about the participant's stroke (for example when it happened, the  
18 area of the brain affected, how it has affected their functioning and abilities)
    - 19 • Details about how long the participant has been in hospital since their stroke
- 20  
21  
22  
23  
24  
25

26 The participant will not miss out on any treatment. Participation will not cost anything. After  
27 completing the tests and the interview the participant will be asked to continue their normal  
28 activities.  
29  
30  
31

32  
33  
34 The participant's hospital discharge will not be affected because they are in this study. The  
35 participant will be discharged from hospital when the hospital medical team decides that they  
36 are ready.  
37  
38  
39

40  
41  
42 There are no known risks of participating in this study. If the participant feels uncomfortable  
43 at any time, you or the participant are free to tell the researcher and observations within  
44 their room will stop immediately. The participant may become upset during the tests or the  
45 interview. If this happens you or the participant can ask to take a break or stop the interview.  
46  
47  
48  
49

50  
51  
52 There will be no immediate benefit to you or the participant from taking part in this research;  
53 however **their participation will allow the collection of information that may help**  
54 **improve stroke hospital wards which may benefit future stroke survivors.**  
55  
56  
57  
58  
59  
60

1 Participating in this study is completely voluntary. The participant can withdraw from taking  
2 part in the study at any time without giving a reason for withdrawing.  
3  
4  
5

6 The participant can request access to their research data at any time. They can request any  
7 of the information collected to be amended or removed if it is incorrect or they disagree with  
8 it. Please contact Sarah D'Souza (phone: 0439 982 451) if you would like to discuss  
9 accessing the participant's information.  
10  
11  
12  
13  
14  
15

16 The video, audio and written data will be identified by code. The information you provide will  
17 remain completely confidential. There will be no identifying information attached to the data  
18 and any information that may reveal the participant's identity will be removed. A list of  
19 participant names and codes will be kept in a locked filing cabinet at Hollywood Private  
20 Hospital and will only be accessible by the research team. All personal health information will  
21 be accessed, used and stored in accordance with Commonwealth Privacy Laws. The data will  
22 be stored on a password controlled computer or in a locked cabinet at Edith Cowan  
23 University. Electronic data will be backed-up on a password controlled hard drive only  
24 accessible by the Chief Investigator. Data will be stored for a maximum of 15 years after  
25 completion of the study. Video and audio recordings will then be permanently deleted and  
26 hard copy data will be shredded.  
27  
28  
29  
30  
31  
32  
33  
34  
35  
36  
37

38 Non-identifiable data will be accessible by researchers through data sharing archives. This  
39 data will be governed by an overarching body to ensure data is only used for approved  
40 research purposes. Researchers who access this data from the data bank will not have access  
41 to participant information therefore data will not be re-identifiable.  
42  
43  
44  
45  
46

47 The results of this study may be published in research journals or presented at conferences.  
48 The results will not include any information that may identify participants. Data may be used  
49 in higher degree by research studies in the future. In this circumstance, confidentiality will be  
50 maintained and no identifying information will be used.  
51  
52  
53  
54  
55  
56

57 Data collected from this study (including videos) may be used to develop training packages to  
58 improve future stroke survivors' communication activity levels in the future. We can blur out  
59  
60



1 the participant's face if they want. If they do not want to be in the training package we will  
2 not include them in the training package.  
3  
4  
5

6 At the end of the research project a summary of the results will be provided to you and the  
7 participant.  
8  
9

10  
11  
12  
13  
14  
15  
16  
17 If you have any questions or require any further information about the research project,  
18 please contact: Sarah D'Souza [Ph: 0439 982 451].  
19  
20  
21  
22  
23  
24  
25

26 Yours sincerely,  
27  
28  
29  
30  
31  
32

33 Sarah D'Souza  
34

35 If you have any concerns or complaints about the research project and wish to talk to an  
36 independent person, you may contact:  
37  
38

39 Kim Gifkins  
40

41 Senior Research Ethics Advisor  
42  
43

44 Edith Cowan University  
45

46 270 Joondalup Drive  
47  
48

49 JOONDALUP WA 6027  
50

51 Phone: (08) 6304 2170  
52

53 Email: [research.ethics@ecu.edu.au](mailto:research.ethics@ecu.edu.au)  
54  
55  
56  
57

58 This project has been approved by the ECU Human Research Ethics Committee and the  
59 Hollywood Private Hospital Research Ethics Committee.  
60

## Visitors and communication partners information and consent form

### Investigating Enhanced Environments after stroke

This research project is being undertaken as part of the requirements of a PhD at Edith Cowan University.

#### Researchers' contact details

| <b>Edith Cowan University</b>                                                               |                                     |                  |
|---------------------------------------------------------------------------------------------|-------------------------------------|------------------|
| Chief Investigator/<br>PhD student                                                          | Sarah D'Souza                       | Ph: 0439 982 451 |
| Principal Supervisor                                                                        | Professor Beth Armstrong            | Ph: 08 6304 2769 |
| Co-Supervisor                                                                               | Associate Professor Natalie Ciccone | Ph: 08 6304 2047 |
| Co-Supervisor                                                                               | Associate Professor Erin Godecke    | Ph: 08 6304 5901 |
| Co-Supervisor                                                                               | Associate Professor Deborah Hersh   | Ph: 08 6304 2563 |
| <b>Hunter Stroke Service, University of Newcastle and Hunter Medical Research Institute</b> |                                     |                  |
| Adjunct Supervisor                                                                          | Dr Heidi Janssen                    | Ph: 02 40420417  |

#### Description of the research project

This study is exploring stroke patient's experiences in regards to the environment of an in-patient stroke rehabilitation unit. We want to explore stroke patient communication activity, which includes activities such as talking with other patients and visitors, socialising, reading the paper, using the telephone, talking to staff, or engaging group activities including therapy.

The participant has agreed to take part in this study. They have agreed to be video recorded for a total of 12 hours over a three day period.

Your interactions with the patient will be video recorded and manually recorded by the chief investigator to explore patient communication activity levels. You can choose to be observed by the researcher only if you do not want to be video recorded. You do not need to do anything other than complete your usual tasks and activities. We will not record if you are having sensitive conversations with the participant, if they are behind closed curtains or completing sensitive tasks such as toileting or showering.

1 We may use the recordings of you to make a training package (including a video). You can have your face  
2 blurred if you want. If you do not want to be in the training package we will not include you in the training  
3 package.  
4

5  
6  
7  
8 There will be no cost to you associated with the investigation. Participation is completely voluntary. You do  
9 not have to participate if you don't want to. If you decide to participate you may withdraw at any time  
10 without giving a reason and withdrawing will not disadvantage you or the participant in any way.  
11  
12  
13

14  
15 You may also benefit from the knowledge that you are helping future stroke survivors. It is possible that you  
16 may not benefit from participating in this study. There are no known risks associated with participating in  
17 this study.  
18  
19  
20  
21  
22

### 23 **Confidentiality of information**

24  
25 The video, audio and written data will be identified by code. There will be no identifying information  
26 attached to the data and any information that may reveal your identity will be removed. A list of participant  
27 names and codes will be kept in a locked filing cabinet at Hollywood Private Hospital and will only be  
28 accessible by the research team. All data will be accessed, used and stored in accordance with  
29 Commonwealth Privacy Laws. The data will be stored on a password controlled computer or in a locked  
30 cabinet at Edith Cowan University. Electronic data will be backed-up on password controlled hard drive only  
31 accessible by the Chief Investigator. Data will be stored for a maximum of 15 years after completion of the  
32 study. Video and audio recordings will then be permanently deleted and hard copy data will be shredded.  
33  
34  
35  
36  
37  
38  
39  
40

41 Non-identifiable data will be accessible by researchers through data sharing archives. This data will be  
42 governed by an overarching body to ensure data is only used for approved research purposes.

43 Researchers who access this data from the data bank will not have access to participant information  
44 therefore data will not be re-identifiable.  
45  
46  
47  
48  
49

50 The results of this study may be published in research journals or presented at conferences. The results  
51 will not include any information that may identify participants. Data may be used in higher degree by  
52 research studies in the future. In this circumstance, confidentiality will be maintained and no identifying  
53 information will be used.  
54  
55  
56  
57  
58

59 Please read this Information Statement and be sure you understand its content before you consent to take  
60 part.

1  
2 If you would like to take part, please complete the consent form and return it to Sarah D'Souza or a  
3 member of the research team.  
4  
5  
6  
7

8 **Questions or further information?**

9 If you have any questions or require any further information about the research project, please contact:  
10 Sarah D'Souza [Ph: 0439 982 451]  
11  
12  
13  
14

15 Thank you for considering the invitation to take part in this research project.  
16  
17

18  
19 Yours sincerely,  
20  
21  
22

23  
24 Sarah D'Souza  
25  
26  
27

28 If you have any concerns or complaints about the research project and wish to talk to an independent  
29 person, you may contact: Kim Gifkins  
30  
31

32 Research Ethics Officer  
33

34 Edith Cowan University  
35

36 270 Joondalup Drive  
37

38 JOONDALUP WA 6027  
39

40 Phone: (08) 6304 2170  
41

42 Email: [research.ethics@ecu.edu.au](mailto:research.ethics@ecu.edu.au)  
43  
44  
45  
46  
47

48 This project has been approved by the ECU Human Research Ethics Committee and the Hollywood Private  
49 Hospital Research Ethics Committee.  
50  
51  
52  
53  
54  
55  
56  
57  
58  
59  
60

1 I \_\_\_\_\_ (print name), give my consent freely and  
2 agree to participate in observations of my interactions with the participant.

3 **Yes**      **No**      (please circle)  
4  
5

6 I agree to the researcher video recording my interactions with the participant

7  
8 **Yes**      **No**      (please circle)  
9

10  
11 I agree to be included in a training package (including a video).

12  
13 **Yes**      **No**      (please circle)  
14  
15

16 If I am included in the video training package I would like my face blurred out.

17  
18 **Yes**      **No**      (please circle)  
19

20  
21 I understand the project will be conducted as stated in the information letter, a copy of which I have  
22 retained.  
23

24  
25 I understand I can withdraw from the project at any time and do not have to give a reason for withdrawing.  
26  
27

28 I understand personal information will remain confidential to the researchers.  
29  
30

31  
32 I have been given the opportunity to raise any questions or concerns I have and am satisfied with the  
33 responses I was given.  
34  
35

36 **Participant**

37  
38 **Print name:** \_\_\_\_\_  
39

40 **Signature:** \_\_\_\_\_  
41

42 **Phone number:** \_\_\_\_\_  
43

44 **Email address:** \_\_\_\_\_  
45

46 **Date:** \_\_\_\_\_

47 **Witness**

48 **Print name:** \_\_\_\_\_  
49

50 **Signature:** \_\_\_\_\_  
51

52 **Date:** \_\_\_\_\_  
53  
54  
55  
56  
57  
58  
59  
60

## Staff information and consent form

### Investigating Enriched Environments after stroke

This research project is being undertaken as part of the requirements of a PhD at Edith Cowan University.

#### Researchers' contact details

| <b>Edith Cowan University</b>                                                               |                                     |                  |
|---------------------------------------------------------------------------------------------|-------------------------------------|------------------|
| Chief Investigator/<br>PhD student                                                          | Sarah D'Souza                       | Ph: 0439 982 451 |
| Principal Supervisor                                                                        | Professor Beth Armstrong            | Ph: 08 6304 2769 |
| Co-Supervisor                                                                               | Associate Professor Natalie Ciccone | Ph: 08 6304 2047 |
| Co-Supervisor                                                                               | Associate Professor Erin Godecke    | Ph: 08 6304 5901 |
| Co-Supervisor                                                                               | Associate Professor Deborah Hersh   | Ph: 08 6304 2563 |
| <b>Hunter Stroke Service, University of Newcastle and Hunter Medical Research Institute</b> |                                     |                  |
| Adjunct Supervisor                                                                          | Dr Heidi Janssen                    | Ph: 02 40420417  |

#### Description of the research project

This study is exploring staff and stroke patient's experiences in regards to the environment of the Edwards and Woods wards at Hollywood Private Hospital. We want to explore stroke patient communication activity, which includes activities such as talking with other patients, socialising, reading the paper, using the telephone, talking to staff, or engaging group activities including therapy. We would like to explore staffs' perceptions of barriers and facilitators to communication activity on the wards and address these in order to enhance the ward environment.

Staff have been selected to participate in order to gain a range of perspectives in regards to the day to day operations, procedures, policies and interactions that influence the environment of the Edwards and Woods wards. A training program for staff will be designed to address barriers and facilitators identified on the wards.

There are two components of this research study that involve staff. You may wish to consent to participate in one or both parts of this study.

1  
2  
3 **Part 1:** Stroke in-patients will be video recorded for a total of 12 hours over a three day period. Your  
4 interactions with the patient will be video recorded and manually recorded by a member of the research  
5 team to explore patient communication activity levels. You can choose to be observed by the researcher  
6 only if you do not want to be video recorded. You do not need to do anything other than complete your  
7 usual daily tasks and activities. We will not record if you are behind closed curtains or completing sensitive  
8 tasks such as toileting or showering the patient.  
9  
10  
11  
12  
13  
14

15 We may want use the recordings of you to make a training package (including a video). We will show you  
16 the video we want to use and explain exactly how this will be used before we do anything. You can have  
17 your face blurred out if you want. If you don't want to be included in the training package we will not include  
18 any videos of you in the training package.  
19  
20  
21  
22  
23

24 **Part 2:** You will be asked to take part in the following:  
25

- 26 • A focus group with the researcher and your co-workers for approximately 1 hour to explore your  
27 perceptions of environmental barriers and facilitators to activity.
- 28 • Attend a training program for approximately 1.5 hours. This will focus on training staff to promote  
29 patient communication on the ward. This session will be located at Hollywood Private Hospital and  
30 will be offered over several dates to facilitate your ability to attend. If you are unable to attend the  
31 training program we may provide training and video resources to facilitate your participation in  
32 training.
- 33 • Complete an anonymous short questionnaire before and after attending the training program to gain  
34 feedback on training and explore your perception of changes in your knowledge, skills and attitudes  
35 towards communication and aphasia.
- 36 • A final focus group with the researcher for approximately 1 hour to again explore your perceptions  
37 of environmental barriers and facilitators to activity.

38 The focus groups will be tape recorded however at any stage you may ask for the tape to stopped,  
39 edited or have your comments erased.  
40  
41  
42  
43  
44  
45  
46  
47  
48  
49  
50

51 There will be no cost to you associated with the investigation. Participation is completely voluntary. You do  
52 not have to participate if you don't want to. If you decide to participate you may withdraw at any time  
53 without giving a reason and withdrawing will not disadvantage you in any way.  
54  
55  
56  
57  
58

59 You may benefit from gaining knowledge and skills regarding communication from attending the training  
60 program. Additionally, you may also benefit from the knowledge that you are helping future stroke

1 survivors. It is possible that you may not benefit from participating in this study. There are no known risks  
2 associated with participating in this study.  
3  
4  
5

## 6 **Confidentiality of information**

7

8 The information you provide during the interviews will be audio recorded by the Chief Investigator. Your  
9 perspectives and opinions will be analysed and grouped into common 'themes' and 'stories'. This will be  
10 used to inform the development and review of the training program.  
11  
12  
13

14  
15  
16 The video, audio and written data will be identified by code. The information you provide will remain  
17 completely confidential. There will be no identifying information attached to the data and any information  
18 that may reveal your identity will be removed. A list of participant names and codes will be kept in a locked  
19 filing cabinet at Hollywood Private Hospital and will only be accessible by the research team. All data will be  
20 accessed, used and stored in accordance with Commonwealth Privacy Laws. The data will be stored on a  
21 password controlled computer or in a locked cabinet at Edith Cowan University. Electronic data will be  
22 backed-up on a password controlled hard drive only accessible by the Chief Investigator. Data will be  
23 stored for a maximum of 15 years after completion of the study. Video and audio recordings will then be  
24 permanently deleted and hard copy data will be shredded.  
25  
26  
27  
28  
29  
30  
31  
32

33 Non-identifiable data will be accessible by researchers through data sharing archives. This data will be  
34 governed by an overarching body to ensure data is only used for approved research purposes.  
35 Researchers who access this data from the data bank will not have access to participant information  
36 therefore data will not be re-identifiable.  
37  
38  
39  
40  
41  
42

43 The results of this study may be published in research journals or presented at conferences. The results  
44 will not include any information that may identify participants. Data may be used in higher degree by  
45 research studies in the future. In this circumstance, confidentiality will be maintained and no identifying  
46 information will be used.  
47  
48  
49  
50

51 A summary of the results will be provided through Hollywood Private Hospital 18 months after the  
52 completion of the study.  
53  
54  
55  
56

57 Please read this Information Statement and be sure you understand its content before you consent to take  
58 part.  
59  
60



1  
2 If you would like to take part, please complete the consent form and return it to Sarah D'Souza, Claire  
3 Tucak or a member of the research team.  
4  
5  
6  
7

8 **Questions or further information?**

9 You may wish to consult with your manager before agreeing to take part in this study.  
10  
11  
12  
13

14 If you have any questions or require any further information about the research project, please contact:

15 Sarah D'Souza [Ph: 0439 982 451]  
16  
17  
18  
19

20 Thank you for considering the invitation to take part in this research project.  
21  
22  
23

24 Yours sincerely,  
25  
26  
27  
28  
29  
30

31 Sarah D'Souza  
32  
33  
34

35 If you have any concerns or complaints about the research project and wish to talk to an independent  
36 person, you may contact: Kim Gifkins  
37  
38

39 Research Ethics Officer  
40

41 Edith Cowan University  
42

43 270 Joondalup Drive  
44

45 JOONDALUP WA 6027  
46  
47

48 Phone: (08) 6304 2170  
49

50 Email: [research.ethics@ecu.edu.au](mailto:research.ethics@ecu.edu.au)  
51  
52  
53  
54

55 This project has been approved by the ECU Human Research Ethics Committee and the Hollywood Private  
56 Hospital Research Ethics Committee.  
57  
58  
59  
60

I \_\_\_\_\_ (print name), give my consent freely and agree to participate in (please circle):

**Part 1:**

Yes                      No                      **Observations** of your interactions with stroke patients.

Yes                      No                      **Video recording** of your interactions with stroke patients.

**Part 2:**

Yes                      No                      Complete two focus groups with the researcher, complete two short questionnaires and attend a training program.

I understand the project will be conducted as stated in the information letter, a copy of which I have retained.

I understand I can withdraw from the project at any time and do not have to give a reason for withdrawing.

I understand personal information will remain confidential to the researchers.

I have been given the opportunity to raise any questions or concerns I have and am satisfied with the responses I was given.

**Participant**

**Print name:** \_\_\_\_\_

**Signature:** \_\_\_\_\_

**Phone number:** \_\_\_\_\_

**Email address:** \_\_\_\_\_

**Date:** \_\_\_\_\_

**Witness**

**Print name:** \_\_\_\_\_

**Signature:** \_\_\_\_\_

**Date:** \_\_\_\_\_

**Volunteer information and consent form**  
**Investigating Enriched Environments after stroke**

This research project is being undertaken as part of the requirements of a PhD at Edith Cowan University.

**Researchers' contact details**

| <b>Edith Cowan University</b>                                                               |                                     |                  |
|---------------------------------------------------------------------------------------------|-------------------------------------|------------------|
| Chief Investigator/<br>PhD student                                                          | Sarah D'Souza                       | Ph: 0439 982 451 |
| Principal Supervisor                                                                        | Professor Beth Armstrong            | Ph: 08 6304 2769 |
| Co-Supervisor                                                                               | Associate Professor Natalie Ciccone | Ph: 08 6304 2047 |
| Co-Supervisor                                                                               | Associate Professor Erin Godecke    | Ph: 08 6304 5901 |
| Co-Supervisor                                                                               | Associate Professor Deborah Hersh   | Ph: 08 6304 2563 |
| <b>Hunter Stroke Service, University of Newcastle and Hunter Medical Research Institute</b> |                                     |                  |
| Adjunct Supervisor                                                                          | Dr Heidi Janssen                    | Ph: 02 40420417  |

**Description of the research project**

This study is a Communication Enhanced Environment (CEE) at Hollywood Private Hospital. A CEE involves several initiatives that aim to provide more opportunities for communication for stroke survivors on the ward. One of these initiatives involves the participation of volunteers.

**As a volunteer participant, you will be asked to take part in the following:**

- Attend a training program for approximately 1.5 hours. This will focus on training volunteers in communicating with stroke patients with communication difficulties. This session will be located at Hollywood Private Hospital and will be offered over several dates to facilitate your ability to attend. If you are unable to attend the training program we may provide training and video resources to facilitate your participation in training.
- Complete an anonymous short questionnaire before and after attending the training program to obtain your feedback on the training session.

- A focus group with the researcher and other volunteers for approximately 1 hour to explore your perceptions of communicating with stroke patients. The focus group will be tape recorded however at any stage you may ask for the tape to stopped, edited or have your comments erased.
- Host a communal dining and lounge area once a week to offer tea and coffee and provide social companionship for stroke patients.
- Your interactions with the patient may be video recorded and manually recorded by a member of the research team to explore patient communication activity levels. You can choose to be observed by the researcher only if you do not want to be video recorded. We will not record if you are having sensitive conversations with the stroke patient/s.

There will be no cost to you associated with participating in this study. Participation is completely voluntary. You do not have to participate if you don't want to. If you decide to participate you may withdraw at any time without giving a reason and withdrawing will not disadvantage you in any way.

You may benefit from gaining knowledge and skills regarding communication from attending the training program. Additionally, you may also benefit from the knowledge that you are helping future stroke survivors. It is possible that you may not benefit from participating in this study. There are no known risks associated with participating in this study.

### **Confidentiality of information**

The information you provide during the interviews will be audio recorded by the Chief Investigator. Your perspectives and opinions will be analysed and grouped into common 'themes' and 'stories'.

The video, audio and written data will be identified by code. The information you provide will remain completely confidential. There will be no identifying information attached to the data and any information that may reveal your identity will be removed. A list of participant names and codes will be kept in a locked filing cabinet at Hollywood Private Hospital and will only be accessible by the research team. All data will be accessed, used and stored in accordance with Commonwealth Privacy Laws. The data will be stored on a password controlled computer or in a locked cabinet at Edith Cowan University. Electronic data will be backed-up on a password controlled hard drive only accessible by the Chief Investigator. Data will be stored for a maximum of 15 years after completion of the study. Video and audio recordings will then be permanently deleted and hard copy data will be shredded.

Non-identifiable data will be accessible by researchers through data sharing archives. This data will be governed by an overarching body to ensure data is only used for approved research purposes.

1 Researchers who access this data from the data bank will not have access to participant information  
2 therefore data will not be re-identifiable.  
3  
4  
5

6 The results of this study may be published in research journals or presented at conferences. The results  
7 will not include any information that may identify participants. Data may be used in higher degree by  
8 research studies in the future. In this circumstance, confidentiality will be maintained and no identifying  
9 information will be used.  
10  
11  
12  
13  
14

15 A summary of the results will be provided through Hollywood Private Hospital 18 months after the  
16 completion of the study.  
17  
18  
19  
20

21 Please read this Information Statement and be sure you understand its content before you consent to take  
22 part.  
23  
24  
25  
26

27 If you would like to take part, please complete the consent form and return it to Sarah D'Souza, Claire  
28 Tucak or a member of the research team.  
29  
30  
31  
32

### 33 **Questions or further information?** 34 35 36

37 If you have any questions or require any further information about the research project, please contact:  
38 Sarah D'Souza [Ph: 0439 982 451]  
39  
40  
41  
42

43 Thank you for considering the invitation to take part in this research project.  
44  
45  
46

47 Yours sincerely,  
48  
49  
50  
51  
52  
53

54 Sarah D'Souza  
55  
56  
57

58 If you have any concerns or complaints about the research project and wish to talk to an independent  
59 person, you may contact: Kim Gifkins  
60

1 Research Ethics Officer

2 Edith Cowan University

3  
4 270 Joondalup Drive

5  
6 JOONDALUP WA 6027

7  
8  
9 Phone: (08) 6304 2170

10  
11 Email: [research.ethics@ecu.edu.au](mailto:research.ethics@ecu.edu.au)

12  
13  
14  
15  
16 This project has been approved by the ECU Human Research Ethics Committee and the Hollywood Private  
17 Hospital Research Ethics Committee.  
18  
19  
20  
21  
22  
23  
24  
25  
26  
27  
28  
29  
30  
31  
32  
33  
34  
35  
36  
37  
38  
39  
40  
41  
42  
43  
44  
45  
46  
47  
48  
49  
50  
51  
52  
53  
54  
55  
56  
57  
58  
59  
60

1 I \_\_\_\_\_ (print name), give my consent freely and  
2 agree to participate in (please circle) this study as described in this information and consent form.

3  
4  
5 I understand the project will be conducted as stated in the information letter, a copy of which I have  
6 retained.

7  
8  
9 I understand I can withdraw from the project at any time and do not have to give a reason for withdrawing.

10  
11  
12 I understand personal information will remain confidential to the researchers.

13  
14  
15 I have been given the opportunity to raise any questions or concerns I have and am satisfied with the  
16 responses I was given.

17  
18  
19  
20  
21 **Participant**

22 **Print name:** \_\_\_\_\_

23 **Signature:** \_\_\_\_\_

24 **Phone number:** \_\_\_\_\_

25 **Email address:** \_\_\_\_\_

26 **Date:** \_\_\_\_\_

27  
28  
29  
30 **Witness**

31 **Print name:** \_\_\_\_\_

32 **Signature:** \_\_\_\_\_

33 **Date:** \_\_\_\_\_

# BMJ Open

**Hospital staff, volunteers, and patients' perceptions of barriers and facilitators to communication following stroke in an acute and rehabilitation private hospital ward: A qualitative description sub-study.**

|                                 |                                                                                                                                                                                                                                                                                                                                                                                                                                                                                                                                                                                                                                                                       |
|---------------------------------|-----------------------------------------------------------------------------------------------------------------------------------------------------------------------------------------------------------------------------------------------------------------------------------------------------------------------------------------------------------------------------------------------------------------------------------------------------------------------------------------------------------------------------------------------------------------------------------------------------------------------------------------------------------------------|
| Journal:                        | <i>BMJ Open</i>                                                                                                                                                                                                                                                                                                                                                                                                                                                                                                                                                                                                                                                       |
| Manuscript ID                   | bmjopen-2020-043897.R1                                                                                                                                                                                                                                                                                                                                                                                                                                                                                                                                                                                                                                                |
| Article Type:                   | Original research                                                                                                                                                                                                                                                                                                                                                                                                                                                                                                                                                                                                                                                     |
| Date Submitted by the Author:   | 04-Feb-2021                                                                                                                                                                                                                                                                                                                                                                                                                                                                                                                                                                                                                                                           |
| Complete List of Authors:       | D'Souza, Sarah; Edith Cowan University, School of Medical and Health Sciences; Centre for Aphasia Recovery and Rehabilitation Research, La Trobe University<br>Godecke, Erin; Edith Cowan University, School of Medical and Health Sciences; Centre for Aphasia Recovery and Rehabilitation Research, La Trobe University<br>Ciccone, Natalie; Edith Cowan University, School of Medical and Health Sciences<br>Hersh, Deborah; Edith Cowan University, School of Medical and Health Sciences<br>Janssen, Heidi; The University of Newcastle Hunter Medical Research Institute<br>Armstrong, Elizabeth; Edith Cowan University, School of Medical and Health Sciences |
| <b>Primary Subject Heading</b>: | Neurology                                                                                                                                                                                                                                                                                                                                                                                                                                                                                                                                                                                                                                                             |
| Secondary Subject Heading:      | Qualitative research, Rehabilitation medicine                                                                                                                                                                                                                                                                                                                                                                                                                                                                                                                                                                                                                         |
| Keywords:                       | Stroke < NEUROLOGY, Adult neurology < NEUROLOGY, QUALITATIVE RESEARCH                                                                                                                                                                                                                                                                                                                                                                                                                                                                                                                                                                                                 |
|                                 |                                                                                                                                                                                                                                                                                                                                                                                                                                                                                                                                                                                                                                                                       |

SCHOLARONE™  
Manuscripts



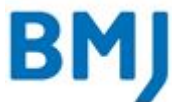

I, the Submitting Author has the right to grant and does grant on behalf of all authors of the Work (as defined in the below author licence), an exclusive licence and/or a non-exclusive licence for contributions from authors who are: i) UK Crown employees; ii) where BMJ has agreed a CC-BY licence shall apply, and/or iii) in accordance with the terms applicable for US Federal Government officers or employees acting as part of their official duties; on a worldwide, perpetual, irrevocable, royalty-free basis to BMJ Publishing Group Ltd ("BMJ") its licensees and where the relevant Journal is co-owned by BMJ to the co-owners of the Journal, to publish the Work in this journal and any other BMJ products and to exploit all rights, as set out in our [licence](#).

The Submitting Author accepts and understands that any supply made under these terms is made by BMJ to the Submitting Author unless you are acting as an employee on behalf of your employer or a postgraduate student of an affiliated institution which is paying any applicable article publishing charge ("APC") for Open Access articles. Where the Submitting Author wishes to make the Work available on an Open Access basis (and intends to pay the relevant APC), the terms of reuse of such Open Access shall be governed by a Creative Commons licence – details of these licences and which [Creative Commons](#) licence will apply to this Work are set out in our licence referred to above.

Other than as permitted in any relevant BMJ Author's Self Archiving Policies, I confirm this Work has not been accepted for publication elsewhere, is not being considered for publication elsewhere and does not duplicate material already published. I confirm all authors consent to publication of this Work and authorise the granting of this licence.

## Title page

### Title

Hospital staff, volunteers, and patients' perceptions of barriers and facilitators to communication following stroke in an acute and rehabilitation private hospital ward: A qualitative description sub-study.

### Authors

Sarah D'Souza<sup>1,2</sup>, Erin Godecke<sup>1,2</sup>, Natalie Ciccone<sup>1</sup>, Deborah Hersh<sup>1</sup>, Heidi Janssen<sup>3</sup>, Elizabeth Armstrong<sup>1</sup>

### Affiliations

1. Edith Cowan University, Perth, Western Australia, Australia
2. Centre for Aphasia Recovery and Rehabilitation Research, La Trobe University, Melbourne, Victoria, Australia
3. Hunter New England Local Health District, NSW Health, New South Wales, Australia

### Addresses of all authors

Sarah D'Souza

School of Medical and Health Sciences, Edith Cowan University  
270 Joondalup Drive, Joondalup 6027, Australia  
s.dsouza@ecu.edu.au

Associate Professor Erin Godecke

School of Medical and Health Sciences, Edith Cowan University  
270 Joondalup Drive, Joondalup, WA 6027, Australia.  
e.godecke@ecu.edu.au

Associate Professor Natalie Ciccone

School of Medical and Health Sciences, Edith Cowan University

1  
2  
3 270 Joondalup Drive, Joondalup 6027, Australia

4  
5  
6 n.ciccone@ecu.edu.au

7  
8 Associate Professor Deborah Hersh

9  
10 School of Medical and Health Sciences, Edith Cowan University

11  
12  
13 270 Joondalup Drive, Joondalup, WA 6027, Australia

14  
15  
16 d.hersh@ecu.edu.au

17  
18 Dr Heidi Janssen

19  
20 Hunter Medical Research Institute

21  
22  
23 Lot 1, Kookaburra Circuit, New Lambton Heights NSW 2305

24  
25  
26 Heidi.Janssen@health.nsw.gov.au

27  
28 Professor Elizabeth Armstrong

29  
30 School of Medical and Health Sciences, Edith Cowan University

31  
32  
33 270 Joondalup Drive, Joondalup, WA 6027, Australia

34  
35  
36 b.armstrong@ecu.edu.au

37  
38  
39  
40 **Key words:** stroke, adult neurology, qualitative research

41  
42  
43 **Reporting guidelines checklist:** The consolidated criteria for reporting qualitative studies  
44 (COREQ)<sup>21</sup> was used to guide reporting this study.

45  
46  
47 **Corresponding author:** Sarah D'Souza is the corresponding author, s.dsouza@ecu.edu.au

48  
49  
50  
51 The Corresponding Author has the right to grant on behalf of all authors and does grant on  
52 behalf of all authors, an exclusive licence (or non-exclusive for government employees) on a  
53 worldwide basis to the BMJ Publishing Group Ltd to permit this article (if accepted) to be  
54 published in BMJ editions and any other BMJ PGL products and sublicences such use and  
55 exploit all subsidiary rights, as set out in our licence.  
56  
57  
58  
59  
60

1  
2  
3  
4  
5  
6 All authors have completed the [Unified Competing Interest form](#)) and declare: This research  
7 was funded by The Hollywood Private Hospital Research Grant (RF087). SD received an  
8 Australian Post Graduate Award Scholarship for the first year of this study, and received an  
9 ECU Research Travel Grant. No other support from any organisation for the submitted work;  
10 no financial relationships with any organisations that might have an interest in the  
11 submitted work in the previous three years, no other relationships or activities that could  
12 appear to have influenced the submitted work.  
13  
14  
15  
16  
17  
18  
19  
20

21 The lead author (the manuscript's guarantor) affirms that the manuscript is an honest,  
22 accurate, and transparent account of the study being reported; that no important aspects of  
23 the study have been omitted; and that any discrepancies from the study as planned have  
24 been explained.  
25  
26  
27  
28  
29  
30

31 This study has Ethics approval from the Edith Cowan University Human Research Ethics  
32 Committee (ECU HREC 12149) and The Hollywood Private Hospital Research Ethics  
33 Committee (HPH431).  
34  
35  
36  
37  
38  
39  
40  
41  
42  
43  
44  
45  
46  
47  
48  
49  
50  
51  
52  
53  
54  
55  
56  
57  
58  
59  
60

## Abstract

**Objectives:** To explore barriers and facilitators to patient communication in an acute and rehabilitation ward setting from the perspectives of hospital staff, volunteers and patients following stroke.

**Design:** A qualitative descriptive sub-study within a larger study which aimed to develop and test a Communication Enhanced Environment in an acute and a rehabilitation ward.

**Setting:** A metropolitan Australian private hospital.

**Participants:** Focus groups with acute and rehabilitation doctors, nurses, allied health staff and volunteers (n=51) and interviews with patients following stroke (n=7), including three with aphasia, were conducted.

**Results:** The key themes related to barriers and facilitators to communication, contained sub-categories related to hospital, staff and patient factors. Hospital related barriers to communication were private rooms, mixed wards, the physical hospital environment, hospital policies, the power imbalance between staff and patients, and task specific communication. Staff related barriers to communication were staff's perception of time pressures, underutilisation of available resources, staff individual factors such as personality, role perception and lack of knowledge and skills regarding communication strategies. The patient related barrier to communication involved patients' functional and medical status. Hospital related facilitators to communication were shared rooms/co-location of patients, visitors and volunteers. Staff related facilitators to communication were utilisation of resources, speech pathology support, staff knowledge and utilisation of communication strategies and individual staff factors such as personality. No patient related facilitators to communication were reported by staff, volunteers or patients.

**Conclusions:** Barriers and facilitators to communication appeared to be interconnected and likely to influence one another suggests communication access may vary between patients within the same setting. Practical changes may promote communication opportunities for patients in hospital early after stroke such as access to areas for patient co-location as well as areas for privacy, encouraging visitors, enhancing patient autonomy, and providing communication trained health staff and volunteers.

### Study strengths

- This study involved a large number of staff in comparison to previous studies and included volunteers working within the acute and rehabilitation wards as well patients following stroke with and without aphasia.
- Data saturation was reached within the staff focus groups.

### Study limitations

- The results in this study reflect the perceptions of a small number of medical (n=2) and nursing staff (n= 11) compared to allied health staff (N= 32) which may be reflected in the results.
- This study involved exploring the perceptions a small number of patients; a broader range of perspectives may have been expressed with a larger number of participants.
- This study was conducted at a private hospital involving a mixed acute and a mixed rehabilitation ward, and a relatively homogenous groups of participants linguistically and ethnically, therefore these results reflect this context and may not be directly generalisable to hospitals in the public sector, nor did they explore cultural factors contributing to communication.

## Background

Aphasia research supports the theory that commencing aphasia rehabilitation in the early phase post-stroke (<1-month post-stroke) results in better outcomes than therapy commenced in the chronic phase (>6-months post stroke).<sup>1,2</sup> However, patients in hospital following stroke spend on average 65-94% of their day inactive.<sup>3</sup> Despite improvements in functional independence during their hospital admission following stroke, patients' engagement in cognitive and social activity remains largely unchanged.<sup>4</sup> Patients with aphasia spend two thirds less time engaged in social interactions with family and friends compared to those without aphasia.<sup>5</sup> A lack of social and cognitive activity early after stroke for patients with aphasia has the potential to contribute to: i) the development of maladaptive compensatory communication behaviours, and ii) the learned non-use of language, which may ultimately impact on their quality of life and overall language recovery.<sup>5</sup>

Patients following stroke with and without aphasia have described time outside therapy as "dead" and "wasted", reporting a lack of stimulation and inactivity in hospital impacting their ability to self-direct their rehabilitation outside of therapy.<sup>6</sup> They report the experience of boredom is worse in the evenings and weekends when there are less structured activities.<sup>7</sup> They also perceive that boredom negatively influences their mood, motivation, and contributes to their experience of post-stroke fatigue.<sup>7</sup> Boredom is associated with a loss of autonomy and sense of control and contributes to patients becoming passive recipients of care, which may have negative implications for stroke recovery.<sup>7</sup>

This study aimed to explore hospital staff and volunteer, and patient perceptions of barriers and facilitators to patient communication in an acute and a rehabilitation hospital ward. Identifying barriers and facilitators to patients' communication will inform the development of a Communication Enhanced Environment (CEE) for the purposes of increasing their engagement in language activity within a hospital ward to maximise post-stroke aphasia language recovery.

## Methods

### Design

This was a sub-study of a larger study which aimed to develop and test a CEE model within an acute and a rehabilitation ward (see supplementary file for study protocol and

1  
2  
3 procedure). This sub-study contributed to the baseline phase of the larger study outlined  
4  
5 below:

- 6  
7 i) *Baseline phase*: observe and quantify levels of engagement in language activity in the  
8 acute and rehabilitation ward environment for patients following stroke, and explore  
9 hospital staff, volunteers, and patients' perceptions of barriers and facilitators to  
10 communication in hospital;  
11  
12 ii) *Implementation phase*: develop and implement the CEE model on the acute and  
13 rehabilitation wards;  
14  
15 iii) *Post-implementation phase*: assess the impact of the CEE mode on patient  
16 engagement in language activity, and hospital staff, volunteers and patients'  
17 perceptions of barriers to communication in hospital.  
18  
19  
20  
21  
22  
23

#### 24 **Reporting guidelines**

25  
26 The consolidated criteria for reporting qualitative studies (COREQ)<sup>8</sup> was used to  
27 guide reporting this study (Appendix C.).  
28  
29

#### 30 **Research authors' relationship with participants**

31  
32 The first author who was external to the hospital conducted focus groups and  
33 interviews. The first author engaged key hospital team members for the duration of the  
34 study to inform the study design to ensure it aligned with the hospital policies and priorities.  
35  
36  
37

#### 38 **Patient and public involvement**

39  
40 Patients and the public were not involved in the design of this study however this  
41 data informed the development of the CEE model in the larger study. A working group  
42 consisting of key members of the stroke multidisciplinary team provided feedback on this  
43 study's findings and were involved in the development of the CEE model and embedding  
44 approach, which was based on the outcomes of this sub-study.  
45  
46  
47

#### 48 **Setting**

49  
50 This study was conducted on an acute and a rehabilitation ward at a private hospital  
51 in Perth, Western Australia. The acute ward was a 26- bed unit with patients following acute  
52 stroke as well as other medical conditions. The acute ward had four individual rooms and  
53 nine shared rooms, two rooms with four beds per room, and seven rooms with two beds  
54 per room. Patients ate meals in their rooms and had access to an outdoor balcony area. The  
55 rehabilitation ward was a 44-bed mixed rehabilitation unit for patients following stroke and  
56  
57  
58  
59  
60



other medical, orthopaedic and post-surgical conditions. There were thirty-six individual rooms, and four shared rooms with two beds in each room. Patients had breakfast in their rooms but were encouraged to eat lunch and dinner in one of two communal dining areas.

### Participants

*Hospital staff participants:* Purposeful sampling of acute and rehabilitation hospital staff was conducted to include at least one representative from each acute and rehabilitation staff group including medical, nursing, volunteers, and allied health staff members who were over 18 years of age. A total of 51 staff and volunteers were recruited (Table 1.) by contacting staff department managers who identified staff currently working or had previously worked with patients following stroke on the acute or rehabilitation wards.

Table 1. Staff participants

| Staff/volunteer groups       |          |                                       |          |                  |          |
|------------------------------|----------|---------------------------------------|----------|------------------|----------|
| <b>Medical &amp; Nursing</b> | <b>N</b> | <b>Allied Health</b>                  | <b>N</b> | <b>Volunteer</b> | <b>N</b> |
| Acute nurses (AN)            | 2        | Dietitian (DT)                        | 1        | Volunteers (V)   | 6        |
| Clinical nurse manager (CNM) | 1        | Occupational therapy manager (OTM)    | 1        |                  |          |
| Medical consultants (MC)     | 2        | Occupational therapists (OT)          | 5        |                  |          |
| Rehabilitation nurses (RN)   | 8        | Occupational therapy assistants (OTA) | 3        |                  |          |
|                              |          | Physiotherapists (PT)                 | 8        |                  |          |
|                              |          | Physiotherapy assistants (PTA)        | 2        |                  |          |
|                              |          | Social workers (SW)                   | 5        |                  |          |

|    |                     |   |
|----|---------------------|---|
| 1  |                     |   |
| 2  |                     |   |
| 3  |                     |   |
| 4  | Speech pathology    | 1 |
| 5  | manager (SPM)       |   |
| 6  |                     |   |
| 7  |                     |   |
| 8  | Speech pathologists | 4 |
| 9  | (SP)                |   |
| 10 |                     |   |
| 11 |                     |   |
| 12 |                     |   |
| 13 | Speech pathology    | 1 |
| 14 | assistant (SPA)     |   |
| 15 |                     |   |
| 16 |                     |   |
| 17 |                     |   |
| 18 | Volunteer manager   | 1 |
| 19 | (VM)                |   |
| 20 |                     |   |
| 21 |                     |   |
| 22 |                     |   |
| 23 |                     |   |
| 24 |                     |   |
| 25 |                     |   |
| 26 |                     |   |
| 27 |                     |   |
| 28 |                     |   |
| 29 |                     |   |
| 30 |                     |   |
| 31 |                     |   |
| 32 |                     |   |
| 33 |                     |   |
| 34 |                     |   |
| 35 |                     |   |
| 36 |                     |   |
| 37 |                     |   |
| 38 |                     |   |
| 39 |                     |   |
| 40 |                     |   |
| 41 |                     |   |
| 42 |                     |   |
| 43 |                     |   |
| 44 |                     |   |
| 45 |                     |   |
| 46 |                     |   |
| 47 |                     |   |
| 48 |                     |   |
| 49 |                     |   |
| 50 |                     |   |
| 51 |                     |   |
| 52 |                     |   |
| 53 |                     |   |
| 54 |                     |   |
| 55 |                     |   |
| 56 |                     |   |
| 57 |                     |   |
| 58 |                     |   |
| 59 |                     |   |
| 60 |                     |   |

---

For peer review only

1  
2  
3           *Patient participants:* All patients consecutively admitted following stroke from  
4 January to February 2016, and June 2016 to July 2017 were screened for eligibility to  
5 participate in the study. Inclusion criteria: i) admitted to the acute or rehabilitation ward  
6 with an acute stroke, ii) less than 21 days post-stroke during data collection, iii) able to  
7 provide informed consent based on the judgement of the medical team responsible for the  
8 medical management of the patient, iv) Glasgow Coma Scale<sup>9</sup> greater than 10, v) estimated  
9 total length of hospital stay greater than 14 days, vi) adequate English proficiency to  
10 participate in interviews as determined by managing speech pathologist or medical team.  
11 Exclusion criteria: i) uncorrected hearing or vision (for example hearing impairment without  
12 the use of hearing aids or vision impairment without the use of glasses), ii) medically  
13 unstable, iii) documented diagnosis of current untreated depression, documented diagnosis  
14 of dementia, previous aphasia or traumatic brain injury. The diagnosis of aphasia was  
15 confirmed for those who achieved a Western Aphasia Battery-Revised<sup>10</sup> Aphasia Quotient  
16 score less than 93.7. A total of 9 patients were recruited, however 2 patients were  
17 withdrawn as they became medically unwell. Data collection was completed for 4 patients  
18 without aphasia and 3 patients with aphasia. See Figure 1. for the summary of patient  
19 screening and recruitment. Patient details and demographics are detailed in Table 2.

20  
21  
22           No staff or patients withdrew from participating in this study.

### 23 24 25 **Data collection**

26           The first author, a female speech pathologist (Bachelor of Speech Pathology,  
27 Honours) and PhD student with seven years clinical experience working in the hospital  
28 setting and five years research experience, including conducting interviews and focus  
29 groups, completed all semi-structured interviews and focus groups. Staff were informed  
30 that the researchers wanted to investigate their perceptions of the hospital ward  
31 environment in regards to communication opportunities to inform the development of a  
32 Communication Enhanced Environment (see supplementary file for staff and volunteer  
33 information and consent forms). Patients were informed that the researchers wanted to  
34 explore how the hospital environment influenced patient activity (see supplementary file for  
35 patient information and consent forms).

36           All interviews and focus groups were conducted using interview and focus group  
37 guides (staff focus groups and interview guide Appendix A., patient interview guide  
38 Appendix B.) and were audio recorded. Field notes were completed by the first author

1  
2  
3 during data collection. Seven staff focus groups were conducted with two to eight  
4 participants in each focus group. One-on-one interviews were conducted with two staff  
5 members. All staff focus groups were completed on the hospital site in various locations  
6 that were private and quiet. Six out of seven patient interviews were conducted in person  
7 during their inpatient admission in their hospital room, and one was completed over the  
8 phone (patient without aphasia) one day following discharge from hospital. All patient  
9 interviews were conducted within fifteen days post-stroke. Interview and focus groups were  
10 20-60 minutes long, often varying based on the number of participants. Supported  
11 conversation strategies<sup>11</sup> were used during interviews with patients with aphasia to  
12 facilitate their participation in the interview. One patients with aphasia had two family  
13 members present during the interview. During the interviews and focus groups, clarifying  
14 questions and paraphrasing participant comments were used to confirm and clarify their  
15 perspectives and insights.  
16  
17  
18  
19  
20  
21  
22  
23  
24  
25  
26  
27  
28  
29  
30  
31  
32  
33  
34  
35  
36  
37  
38  
39  
40  
41  
42  
43  
44  
45  
46  
47  
48  
49  
50  
51  
52  
53  
54  
55  
56  
57  
58  
59  
60

1  
2  
3  
4  
5  
6  
7  
8  
9  
10  
11  
12  
13  
14  
15  
16  
17  
18  
19  
20  
21  
22  
23  
24  
25  
26  
27  
28  
29  
30  
31  
32  
33  
34  
35  
36  
37  
38  
39  
40  
41  
42  
43  
44  
45  
46  
47  
48  
49  
50  
51  
52  
53  
54  
55  
56  
57  
58  
59  
60

[Figure 1. inserted here]

For peer review only

Table 2. Patient characteristics

|                                                           | Group<br>(n=7) | PWA<br>(n = 3) | PWOA<br>(n = 4) |
|-----------------------------------------------------------|----------------|----------------|-----------------|
| Participants                                              |                |                |                 |
| Age (yr), mean (SD)                                       | 83 (7)         | 81 (5)         | 84 (8.10)       |
| Sex, n females                                            | 4              | 1              | 3               |
| Pre-morbid mobility, n needing aids                       | 1              | 1              | 0               |
| Pre-morbid living arrangement, n alone                    | 3              | 1              | 2               |
| Time since stroke (d), mean (SD)                          | 14 (5)         | 13 (7)         | 15 (5)          |
| Stroke severity (NIHSS <sup>12</sup> 0-42), mean (SD)     | 4 (3)          | 5 (4)          | 5 (3)           |
| Mild, n score < 8                                         | 5              | 2              | 3               |
| Moderate, n score 8-15                                    | 2              | 1              | 1               |
| Severe, n score > 15                                      | 0              | 0              | 0               |
| Mobility status at time of data collection                |                |                |                 |
| Independent +/- walking aid                               | 1              | 0              | 1               |
| Stand-by assistance                                       | 3              | 1              | 2               |
| 1-2 person assistance                                     | 2              | 1              | 1               |
| Hoist/wheelchair                                          | 1              | 1              | 0               |
| Cognition (MOCA <sup>13</sup> ), median (range)           | 18 (9-22)      | 16 (9-18)      | 20 (17-22)      |
| Aphasia severity, WAB-R <sup>10</sup> AQ mean, (SD)       |                | 77 (6.50)      |                 |
| Ward (d)                                                  |                |                |                 |
| Acute (%)                                                 | 4 (17)         | 4 (40)         | 0 (0)           |
| Rehabilitation (%)                                        | 19 (83)        | 6 (60)         | 13 (100)        |
| Average number of days in single room per participant (%) | 3.1 (96)       | 3 (90)         | 3.3 (100)       |

Notes: PWA= patient with aphasia; PWOA= patient without aphasia; NIHSS=National Institute of Health Stroke Scale<sup>12</sup>; MoCA= Montreal Cognitive Assessment<sup>13</sup>; WABAQ=Western Aphasia Battery-Revised<sup>10</sup> Aphasia Quotient score.

### Data analysis

Focus groups and interviews were transcribed verbatim. Responses to any leading questions were removed from the data set.<sup>14</sup>

The theoretical framework for this research was a qualitative description approach.<sup>15</sup> This approach involves describing patient experiences, with minimal interpretation of the data to minimise potential bias of the researchers.<sup>15</sup> Participant experiences were analysed using NVivo<sup>16</sup> computer software to manage the data. Data were grouped into themes according to content.<sup>15</sup> The first level of coding identified the broad content of the data then sub-categories were identified.<sup>15</sup> Single lines of data were not removed from their 'story' during data analysis to maintain the context and help ensure meaning was not lost or misinterpreted.<sup>15</sup> Ongoing critical review of the categories were conducted and themes were reviewed by a second researcher.<sup>15</sup> Staff were provided feedback on the findings.

### Results

The key themes from the focus group and interviews related to barriers and facilitators to communication, with sub-categories identified which related to hospital, staff and patient factors (Figure 2.).

1  
2  
3  
4  
5  
6  
7  
8  
9  
10  
11  
12  
13  
14  
15  
16  
17  
18  
19  
20  
21  
22  
23  
24  
25  
26  
27  
28  
29  
30  
31  
32  
33  
34  
35  
36  
37  
38  
39  
40  
41  
42  
43  
44  
45  
46  
47  
48  
49  
50  
51  
52  
53  
54  
55  
56  
57  
58  
59  
60

[Figure 2. inserted here]

For peer review only



## Barriers to Communication

### Hospital related factors

#### Private rooms reduce opportunities for social interaction

Staff and patients described the impact of single rooms which limited incidental socialisation with other patients and their visitors.

We used to co-locate our stroke patients and often using our shared rooms. That's when people had more opportunities for interacting with one another. (MedC1)

#### Mixed wards affect staff acquisition of specialist skills

Staff described their perception of the negative effect a mixed hospital ward had on the acquisition of stroke specific specialist skills.

Having a stroke specific ward... everybody on the ward would be trained...and that's the only thing they'd have to focus on rather than having lots of other patients with lots of medical conditions. (OT4)

#### Hospital environment does not encourage socialising

Staff talked about the physical hospital ward environment affecting social interaction as it contributed to a sterile atmosphere rather than one that promoted social activity. Staff also talked about the consequence of background noise and environmental distractors in large shared rooms on the acute ward which reduced their ability to communicate with patients with communication impairments.

My general feeling of rehab [rehabilitation] is that they come to their sessions and then they go back to their lonely dark room... I don't really see the rooms as a particularly happy, busy place where they are getting a lot out of being in there... the dining rooms... they're not a particularly pleasant place to be either. (PT2)

They [patients] can hear other people talking... there is [sic] a lot of voices going on which is going to impact on their understanding as well. (PT3)

#### Hospital policies restrict the development of communication-promoting ideas and initiatives

Hospital policies were perceived by staff as a barrier to communication, negatively influencing their ability to develop ideas and initiatives to increase patients' opportunities for social interaction. This included policies regarding leaving patients unattended in dining areas without patient care assistants supervising them, and requiring nurses to supervise

1  
2  
3 patients if they are eating; and reported limitations around food related activities as a result  
4 of food hygiene policies and occupational health and safety.

5  
6  
7 It's just every time you try and do something you hit a barrier... you do try and think  
8 outside the box what more can you do for this patient and you get another hospital  
9 rule. (PT2)  
10

### 11 12 **Power imbalance of staff and patients in hospital controls patients' ability to access** 13 **communication opportunities**

14  
15  
16 Staff and patients discussed the influence of the power imbalance for patients in  
17 hospital, and patient perceptions that they have to do what is expected in the hospital  
18 environment. This appeared to limit the patients' ability to freely engage and explore the  
19 environment resulting in patients retreating to their rooms and limiting their opportunities  
20 to engage in activities.  
21  
22

23  
24  
25 I think most males like to account for their time um and I felt like I haven't been able  
26 to do that and that's, that's the bit that I'm really, really lacking. (PWA2)

27  
28 I was in the hospital so I think I had to stick into the room, to the rules. (PWOA2)

29  
30 Very often when you're in a hospital you do what you think you're expected to do.  
31  
32 (SP4)  
33

### 34 **Task specific communication reduces patients' communication opportunities**

35  
36 Staff talked about the nature of interactions with patients as often being driven by  
37 the patient's care, restricting opportunities for communication beyond this context.

38  
39 I know we aim to be very holistic... but very often care is very[sic] directed from a  
40 medical health care perspective (SP4)  
41  
42

### 43 **Staff related factors**

#### 44 45 **Staff's perception of time pressures limiting opportunities for communication**

46  
47 Both patients and staff perceived staff time pressures as a barrier negatively  
48 effecting communication on the wards. This may be the reflection of actual time pressures,  
49 or staff perceptions of their available time. Some staff reported that they felt interactions  
50 with patients with communication impairments required extra time which was challenging  
51 in a time pressured hospital environment. Time pressures were also perceived to restrict the  
52 staff's ability to facilitate opportunities for patients to socialise with other patients. For  
53 example, nurses appeared to deprioritise transferring patients to the communal area for  
54 lunch in busier times.  
55  
56  
57  
58  
59  
60

1  
2  
3 If they're hoist patients it might not be as easy for staff to get them to the dining  
4 room, that wouldn't totally prevent someone from going, it would just depend on  
5 the time that people had on the day. (SW3)  
6  
7

### 8 **Staff and patient's underutilisation of available resources**

9  
10 Staff described the lack of accessible resources as a factor negatively affecting staff-  
11 patient communication. They described the need for resources when communicating with  
12 patients with aphasia and other communication impairments but felt unsure about what  
13 these were or how to access them. They also described a number of resources that they felt  
14 patients were not aware of and therefore did not utilise such as volunteer services that  
15 promote communication opportunities and facilitate patient access to outdoor areas.  
16  
17

18 I feel like I don't know where else to go. I don't know if other things that [sic] could  
19 help us, maybe there's things out there that I don't know about that would help us  
20 communicate with these patients. (PT2)  
21  
22

23 There are all of these opportunities but I don't think a lot of the patients access them  
24 so it sounds like great communicative opportunities for them but the reality is that a  
25 lot of them are sitting in their rooms most of the times by themselves watching  
26 television and most of the interactions they have is with the nurses or just whoever  
27 comes in to see them. (SP4)  
28  
29

### 30 **Individual staff factors leading to restricted opportunities for communication**

31 Staff described individual staff factors such as personality, values and attitudes  
32 influencing communication opportunities for patients, such as staff providing patients with  
33 opportunities for incidental social interaction during routine tasks.  
34  
35

36 Often if people need to go in and see the patient let's just say to take obs  
37 [observations] or to do a wash... they don't always use that opportunity as an  
38 opportunity to chat... there could be more opportunity to chat at those times whilst  
39 they are doing what they need to get done and you know that varies from person to  
40 person, personality as well and how busy people are, what else is going on. (SP3)  
41  
42

### 43 **Staff's perception their role does not include communication tasks**

44 Some staff perceived communication as a task separate from the responsibility of  
45 their role therefore limiting their facilitation of communication opportunities for patients.  
46  
47  
48  
49  
50  
51  
52  
53  
54  
55  
56  
57  
58  
59  
60

1  
2  
3 They [speech pathologists] do their bit and we do ours... we don't have time to  
4 practice speech with them because we really do have to get all of our jobs filled in  
5 the time and it's specifically rostered for us to do our work, not to help with  
6 someone else's. (RehabN1)  
7  
8  
9

### 10 **Lack of staff knowledge and skills resulting in unsuccessful communication interactions or** 11 **avoiding communication interactions** 12 13

14 Staff described a lack of knowledge and skills in communicating with patients with  
15 communication impairments. Some staff reported feeling anxious about encouraging  
16 patients to communicate as communication breakdowns may cause stress and anxiety for  
17 the patient, and the staff member. Staff reported a lack of confidence in their ability to  
18 repair communication breakdowns which resulted in increased time pressures in their  
19 sessions, often leading them to avoid encouraging communication interactions within their  
20 treatment sessions.  
21  
22  
23  
24  
25  
26

27 I find it challenging... knowing how the best way to communicate with that person  
28 [with aphasia]... then [they] become very frustrated and not have the tools  
29 themselves to communicate back to me and you would never want to leave  
30 someone in that space. So that's something that I struggle with. (SW2)  
31  
32  
33  
34

### 35 **Patient related factors**

36 Patient related factors reflected their functional and medical status, personality,  
37 mood and motivation, which were perceived by staff and patients to often act as a barrier to  
38 engaging in communication interactions during their hospital admission early after stroke.  
39  
40

### 41 **Patients' functional and medical status limiting their ability to seek out and engage in** 42 **activities** 43 44

45 Staff and patients perceived patients' medical status as a barrier to communication  
46 by limiting their ability to engage with their environment including independently seeking  
47 out activities and being able to utilise communal areas.  
48  
49

50  
51 If someone is bed bound, you know the interaction is very minimal... you often walk  
52 past and you see them alone in their room... you wonder what happens during those  
53 periods of time where they're just in their room and they don't have family. (OT2)  
54  
55 Well, I can't do anything cos I can't go off by myself and do anything. (PWOA2)  
56  
57

### 58 **Individual patient factors limiting opportunities for communication** 59 60

1  
2  
3 Staff described individual patient factors such as personality, mood and motivation  
4 communication opportunities for patients such as independent practice of communication  
5 therapy tasks, and social opportunities with patients and hospital staff.  
6  
7

8 We have to recognise some patients who have had strokes... they're fed up with  
9 having people poking and prodding them then have a volunteer and go "do you want  
10 to do your exercises for speech?" (VM)  
11  
12

13 They need a break after OT [the occupational therapist] has done a shower. If they  
14 don't get that break then the physio isn't going to be as good for them because  
15 they're so tired, so we also have to look at break times in between each sessions...  
16  
17  
18  
19 (OTA1)  
20

## 21 **Facilitators to Communication**

### 22 **Hospital related factors**

#### 23 **Shared rooms/co-location encourages incidental social interactions**

24 Staff talked about use of communal areas at other hospitals which facilitated  
25 socialisation and communication during non-therapy times and during group therapy. Staff  
26 described the importance of the use of communal areas given the large number of private  
27 rooms on the ward. Patients also described the need to be co-located to promote social  
28 interaction.  
29  
30  
31  
32  
33  
34  
35

36 I think that, put the [sic] whole lot of people together and ah and they [sic]  
37 something collective, that's what human beings are put together for ... sitting around  
38 talking... over the proverbial cuppa. (PWA2)  
39  
40  
41

#### 42 **Visitors provide patients opportunities for socialisation**

43 Staff identified visitors as a facilitator to communication interaction for patients  
44 outside of therapy times during their inpatient admission.  
45  
46

47 Interaction with the family... it's not therapy based but it's their [patients']  
48 opportunity to practice. (PT1)  
49  
50

#### 51 **Volunteers facilitate opportunities for patients to engage in social activities**

52 Staff discussed the benefit of volunteers in facilitating opportunities for patients to  
53 engage in social interactions including programs involving therapy dogs, book loaning, hand  
54 massages, and taking patients off the ward.  
55  
56  
57  
58  
59  
60

1  
2  
3 If we see people that are lonely, are not getting visitors, there's many volunteers... to  
4 go and visit them and if they're well enough they can take them out... the volunteers,  
5 we do rely on them. (OTA1)  
6  
7  
8  
9

## 10 **Staff related factors**

### 11 **Staff utilisation of resources promote communication exchange**

12 Staff identified access to resources such as chat books and alternative and  
13 augmentative communication boards often facilitated communication interactions with  
14 patients with communication impairments on the ward.  
15

16 Sometimes with the ... signs... "do you want to drink? some water?" or something, so  
17 they can just point because ... they want to say something and maybe the right  
18 words are not coming out... that also helps. (RehabN3)  
19

### 20 **Speech pathology support and education facilitates staff's use of communication** 21 **promoting strategies**

22 Staff reported support and education from speech pathology staff facilitated their  
23 ability to interact successfully with patients with aphasia.  
24

25 I had a patient who had word finding difficulties... I just was observing the speechie  
26 [speech pathologist], she would just be like "no, what do you mean?" and he'll be  
27 like [pointing] and she'll be like "tell me what's the word"... it's something I could  
28 have just added to my session. (PT4)  
29

### 30 **Staff knowledge and utilisation of communication strategies promotes communication** 31 **activities**

32 Staff and volunteers discussed the use of communication strategies and resources to  
33 facilitate communication on the ward for patients with a variety of communication  
34 impairments.  
35

36 We use communication boards, pictures, writing things down, talking slowly.  
37

38 (MedC2)

39 If they are having trouble, I will say to them "it's okay you don't need to hurry, that's  
40 fine". (V1)  
41

### 42 **Individual staff factors promote communication opportunities for patients**

1  
2  
3 Staff and patients talked about how individual characteristics of staff, including  
4 rapport building and being friendly, facilitated communication for patients with  
5 communication difficulties.  
6  
7

8 Sometimes they [patients] look for that specific person... the more they get  
9 confident, the more they get relaxed, the more their speech enhances as well.  
10  
11  
12 (RehabN3)  
13  
14  
15

## 16 Discussion

17 This study aimed to explore hospital staff, volunteers and patients' perceptions of  
18 barriers and facilitators to communication on an acute and a rehabilitation ward. A wide  
19 range of factors were perceived to act as potential barriers or facilitators to communication.  
20 Additionally, a number of factors influencing patient access to communication opportunities  
21 appeared to influence one another.  
22  
23  
24  
25  
26

27 The co-location of patients in therapy spaces, dining areas or in shared rooms were  
28 perceived as facilitators to communication for patients, providing opportunities for  
29 incidental social interactions with other patients and their visitors. However, background  
30 noise in these shared spaces was also perceived to act as a barrier to their ability to engage  
31 in communication. Patient access to communal spaces was influenced by a number of  
32 factors including patients' sense of autonomy to freely explore the hospital ward  
33 environment, and their medical and mobility status, and staff's perception of their available  
34 time, which influenced staff's perception of whether they transferred patients to these  
35 spaces. Rosbergen et al<sup>17</sup> reported that in an acute stroke ward enriched environment  
36 communal mealtimes and group activities were perceived to facilitate social activity. The  
37 study by Rosbergen et al<sup>17</sup> found that staff reported perceptions that shared rooms limited  
38 staff and patients' ability to engage in private conversations, consistent with O'Halloran et  
39 al's<sup>18</sup> findings. It may be that access to both private and communal spaces available within  
40 the hospital environment play critical roles in regards to providing opportunities for social  
41 interactions with other patients and their visitors and opportunities for privacy when  
42 required.  
43  
44  
45  
46  
47  
48  
49  
50  
51  
52  
53  
54  
55

56 The acute and rehabilitation wards had a large proportion of single rooms, which  
57 could have been considered the result of this study being conducted at a private hospital.  
58 However, there has been a perceived trend towards increased proportions of single rooms  
59  
60

1  
2  
3 in newly built public hospitals to promote infection control and patient privacy which may  
4 have a detrimental effect on communication.<sup>19,20</sup> The predominance of single rooms and  
5 limited opportunities to access shared spaces may have increased the effect of other  
6 barriers on communication opportunities for patients. For example, a patient with poor  
7 autonomy may be more likely to remain alone in their single room when they are not  
8 attending therapy, as they perceive they are not 'allowed' to freely explore the hospital  
9 environment. This may reduce the likelihood of the individual independently seeking out  
10 social interactions beyond their room. If they also have reduced mobility, they may be more  
11 reliant on staff to facilitate transfers to communal spaces which may be impacted by staff  
12 time constraints. The patient's functional status and levels of fatigue may also limit their  
13 ability to initiate and engage in activities while they are in their room. Therefore, the  
14 combined effect of these barriers may significantly limit this patient's communication  
15 opportunities.

16  
17  
18  
19  
20  
21  
22  
23  
24  
25  
26  
27  
28  
29  
30  
31  
32  
33  
34  
35  
36  
37  
38  
39  
40  
41  
42  
43  
44  
45  
46  
47  
48  
49  
50  
51  
52  
53  
54  
55  
56  
57  
58  
59  
60  
These communication barriers may be mitigated by having scheduled rest periods,  
and periods allocated to encouraging visitors to provide opportunities for communication  
and socialisation within their room, and facilitate patient access to shared spaces, such as  
helping mobilise wheelchair users into communal dining areas or education to patients that  
they are allowed to explore the hospital ward environment. Rosbergen et al<sup>17</sup> identified  
patient and family autonomy to initiate and direct activity as a factor enriching the acute  
ward environment. Therefore, increasing patient autonomy within this setting may facilitate  
their ability to seek out interactions within the environment and increase engagement in  
communication activity, which may then reduce the effect of being in a single room with  
reduced mobility and time poor staff.

A potential lack of opportunities to access social interactions with other patients  
means staff, including volunteers, and visitors may become the main communication  
partner for patients. Godecke et al's<sup>5</sup> observation study found that nurses are the most  
frequent communication partner for patients following stroke with aphasia, after their  
family members, therefore patient-staff interactions may play a significant role for those  
patients with minimal or no visitors. It is interesting to note that this study recruited a  
limited number of acute nurses in comparison to rehabilitation nurses. This could be  
interpreted as a reflection of differences in nurses' capacity for additional activities within  
the demands and time restrictions of the acute ward context in comparison to the



1  
2  
3 rehabilitation ward context. Within the current study, communication between staff and  
4 patients appeared to be dependent on a number of factors including staff perception of  
5 their role, their knowledge and skills in facilitating communication, their values and  
6 attitudes towards communication and whether supporting language and communication for  
7 patients with aphasia is part of their 'role', their willingness to be flexible with their time,  
8 and their knowledge of and access to resources which may be used to facilitate  
9 communication. This also highlights the potential impact of the perceived power imbalance  
10 between staff and patients and the significance of interactions that are task directed. Hersh  
11 et al<sup>21</sup> reported patients with aphasia felt disempowered in communicative interactions  
12 with nurses, where nurses tended to talk to the task and controlled the interactions. This  
13 highlights the need for communication partner training which may provide staff with the  
14 knowledge and skills required to support effective communication with patients with  
15 aphasia.<sup>22</sup> Implementation strategies will need to be considered to promote behaviour  
16 change as well as the uptake and maintenance of training including involvement of  
17 management and ward champions, and ensuring trained communication strategies are easy  
18 to learn, apply and audit in order to be applicable in this busy context.<sup>23</sup>

19  
20  
21  
22  
23  
24  
25  
26  
27  
28  
29  
30  
31  
32  
33 Time pressure was perceived as a major barrier to communication impacting on  
34 staff's ability to support successful communication within their interactions with patients,  
35 and facilitate patients' opportunities to engage in interactions in social or communal areas.  
36 Time constraints have been reported to limit communicative opportunities between  
37 patients following stroke and nurses.<sup>24</sup> Ball et al<sup>24</sup> found that 86% of surveyed nurses  
38 reported one or more activities had been "left undone" in their last shift as a result of lack  
39 of time. The study found that activities most likely to be missed by nurses as a result of time  
40 constraints were comforting and talking to patients (66%) and patient education (52%).<sup>24</sup>  
41 This has also been identified by patients who "did not like to bother the busy nurse".<sup>25</sup> Time  
42 limitations and pressures on the wards may be facilitated by developing staff knowledge of  
43 and skills in using communication promoting strategies. Effective and efficient nurse patient  
44 communication as a result of nurse training has been found to save time, reduce frustration  
45 and reduce the burden associated with caring for patients following stroke with aphasia.<sup>26</sup>  
46 Additionally, time limitations reported by staff may lend to an argument for additional  
47 nursing allocation for patients with communication impairments.  
48  
49  
50  
51  
52  
53  
54  
55  
56  
57  
58  
59  
60

1  
2  
3 This study included a small number of medical and nursing staff in comparison to  
4 compared to allied health staff which may be reflected in the reported results. This study  
5 also involved a small number of patients and a broader range of perspectives may have  
6 been expressed with a larger number of participants. The results of this study may reflect  
7 the context of a private metropolitan hospital therefore further exploration of patient and  
8 staff perspectives in the public sector may be warranted.  
9  
10  
11  
12  
13

## 14 **Conclusions**

16 The barriers and facilitators to communication appear to be interconnected and  
17 likely to influence one another, suggesting that the level of communication access may vary  
18 from patient to patient within the same setting. Results of this study highlight a number of  
19 practical changes that could be implemented to promote communication opportunities for  
20 patients admitted to hospital early after stroke. However, implementation of behaviour and  
21 cultural change strategies may be pertinent to promote meaningful and sustainable change  
22 within the hospital setting. Consideration of areas for co-location for patients such as  
23 therapy spaces, dining areas or shared rooms as well as access to private spaces may  
24 potentially address the need for social opportunities with other patients as well as access to  
25 privacy when required. The promotion of visitors attending the wards may facilitate  
26 communication opportunities for patients between therapy times by providing socialisation  
27 in patients' rooms as well as facilitating and advocating for patient access to communal  
28 areas. This has the potential to mitigate the effect of social isolation in single rooms, staff  
29 time restraints and limitations as a result of patients' medical status. Strategies to promote  
30 patient autonomy in hospital may promote their ability to freely explore the environment  
31 beyond their room may help address the power imbalance that can occur between patients  
32 and hospital staff. Additionally, health staff and volunteer education in using  
33 communication promoting strategies may increase opportunities for interactions between  
34 patients, and staff or volunteers and promote communication exchange within those  
35 interactions. These factors will be explored in a Communication Enhanced Environment,  
36 which aims to increase patients' opportunities to engage in language activities during early  
37 stroke recovery in hospital.  
38  
39  
40  
41  
42  
43  
44  
45  
46  
47  
48  
49  
50  
51  
52  
53  
54  
55

## 56 **Acknowledgements**

57  
58  
59  
60

1  
2  
3 The authors would like to thank the hospital and staff for supporting this study and  
4 assisting in participant recruitment. We would also like to thank all the participants in this  
5 study for sharing their experiences and insights.  
6  
7

### 8 9 **Author contributions**

10  
11 SD, EG, NC, DH, HJ and EA designed the study and the protocol. EG reviewed the final  
12 copies of the protocol documents. SD conducted the semi-structured interviews and focus  
13 groups. SD performed data analysis. DH conducted the critical review of the categories and  
14 review of themes. SD, EG, NC, DH, HJ and EA contributed to the manuscript and approved  
15 the manuscript.  
16  
17

### 18 19 **Competing interests statement**

20  
21 This research was funded by The Hollywood Private Hospital Research Grant (RF087).  
22 SD received an Australian Post Graduate Award Scholarship for the first year of this study,  
23 and received an ECU Research Travel Grant. The authors have no other competing interests  
24 to declare.  
25  
26

### 27 28 **Funding statement**

29  
30 This work was supported by the Hollywood Private Hospital Research Foundation  
31 grant number RF087. SD received an Australian Post Graduate Award Scholarship for the  
32 first year of this study, and received an ECU Research Travel Grant.  
33  
34

### 35 36 **Data sharing statement**

37  
38 Data is stored to NHMRC standards and will be available (in a de-identified manner)  
39 on request.  
40  
41

### 42 43 **Figures**

44  
45 Figure 1. Summary of patient screening and recruitment.

46  
47 Figure 2. Summary of themes and subthemes of staff and patient perceptions to  
48 barriers and facilitators to patient following stroke.  
49  
50  
51  
52  
53  
54  
55  
56  
57  
58  
59  
60

## References

1. Ali M, Brady M, Ali M, et al. Predictors of post-stroke aphasia recovery: a systematic review-informed individual participant data (IPD) meta-analysis. *Stroke*; 2021 (*In Press*).
2. Robey, RR. A meta-analysis of clinical outcomes in the treatment of aphasia. *J Speech Lang Hear Res*. 1998;41(1): 172-187.
3. Fazio S, Stocking J, Kuhn B, et al. How much do hospitalized adults move? A systematic review and meta-analysis. *Appl Nurs Res*. 2019; <https://doi.org/10.1016/j.apnr.2019.151189>
4. Janssen H, Ada L, Bernhardt J, et al. Physical, cognitive and social activity levels of stroke patients undergoing rehabilitation within a mixed rehabilitation unit. *Clin Rehabil*. 2014;28: 91–101.
5. Godecke E, Armstrong E, Hersh D, et al. Missed Opportunities: Communicative interactions in early stroke recovery. Conference presentation at Stroke Society of Australasia Annual Scientific Meeting; 2014; Hamilton Island, Queensland.
6. Eng X, Brauer SG, Kuys SS, et al. Factors affecting the ability of the stroke survivor to drive their own recovery outside of therapy during inpatient stroke rehabilitation. *Stroke Research and Treatment*. 2014: 1-8.
7. Kenah K, Bernhardt J, Cumming T, et al. Boredom in patients with acquired brain injuries during rehabilitation: A scoping review, *Disabil & Rehab*. 2018;40(22): 2713-22.
8. Tong A, Sainsbury, Craig J. Consolidated criteria for reporting qualitative research (COREQ): A 32-item checklist for interviews and focus groups. *International Journal for Quality in Health Care*. 2007;19(6): 349-357.
9. Teasdale G, Jennett B. Assessment of coma and impaired consciousness. A practical scale. *Lancet*. 1974;2(7872): 81–4.
10. Kertesz A. *Western Aphasia Battery- Revised*. San Antonio, TX, Harcourt Assessment; 2006.
11. Kagan, A. Supported conversation for adults with aphasia: methods and resources for training conversation partners. *Aphasiology*. 1998;12(9): 816-830.

12. NIH stroke scale [Internet]. Bethesda, Md, National Institute of Neurological Disorders and Stroke (U.S.). 2011 [cited 2016 Feb 10]. Available from [https://www.ninds.nih.gov/sites/default/files/NIH\\_Stroke\\_Scale.pdf](https://www.ninds.nih.gov/sites/default/files/NIH_Stroke_Scale.pdf)
13. Nasreddine ZS, Phillips NA, Bédirian V, et al. The Montreal Cognitive Assessment, MoCA: a brief screening tool for mild cognitive impairment. *J Am Geriatr Soc*. 2005;53(4): 695-9.
14. Milne J, Oberle K. Enhancing rigour in qualitative description: A case study. *J Wound Ostomy Continence Nurs*. 2005;32(6): 413-420.
15. Neergaard MA, Olesen F, Anderson RS, et al. Qualitative description- the poor cousin of health research. *BMC Med Res Methodol*. 2009;9(1): 52-7.
16. NVivo qualitative data analysis software; QSR International Pty Ltd. Version 12, 2018.
17. Rosbergen IC, Brauer SG, Fitzhenry S, et al. Qualitative investigation of the perceptions and experiences of nursing and allied health professionals involved in the implementation of an enriched environment in an Australian acute stroke unit. *BMJ Open*. 2017 Dec 21; 7(12): e018226.
18. O'Halloran R, Grohn B, Worrall L. Environmental factors that influence communication for patients with a communication disability in acute hospital stroke units: A qualitative metasynthesis. *Arch Phys Med Rehabil*. 2012;93(1): S77-S85.
19. Anañker A, von Koch L, Heylighen A, et al. "It's lonely: Patients' experiences of the physical environment at a newly built stroke unit. *Health Environments Research & Design Journal*. 2017;12(3): 141-52.
20. Shannon MM, Lipson-Smith R, Elf M, et al. Bringing the single versus multi-patient room debate to vulnerable patient populations: A systematic review of the impact of room types on hospitalized older people and people with neurological disorders. *Intelligent Buildings International*. 2018; <https://doi.org/10.1080/17508975.2018.154833>
21. Hersh D, Godecke E, Armstrong E, et al. "Ward talk": Nurses' interaction with people with and without aphasia in the very early period poststroke. *Aphasiology*. 2016;30(5): 609-628.
22. Simmons-Mackie N, Raymer A, Armstrong E, et al. Communication partner training in aphasia: A systematic review. *Arch Phys Med Rehabil*. 2010;91: 1814-1837.
23. Shrubsole K, Worrall L, Power E. Closing the evidence-practice gaps in aphasia management; Are we there yet? Where has a decade of implementation research taken us? A review and guide for clinicians. *Aphasiology*. 2019;33(8): 970-95.

- 1  
2  
3 24. Ball JE, Murrells T, Rafferty AM, et al. 'Care left undone' during nursing shifts:  
4 Associations with workload and perceived quality of care. *BMJ Qual Saf*, 2014;23(2): 116–  
5 125.  
6  
7  
8 25. McCabe C. Nurse–patient communication: An exploration of patients' experiences. *J Clin*  
9 *Nurs*. 2004;13: 41–49.  
10  
11 26. McGilton K, Sorin-Peters R, Sidani S, et al. Focus on communication: Increasing the  
12 opportunity for successful staff–patient interactions. *Int J Older People Nurs*. 2009;6: 13–24.  
13  
14  
15  
16  
17  
18  
19  
20  
21  
22  
23  
24  
25  
26  
27  
28  
29  
30  
31  
32  
33  
34  
35  
36  
37  
38  
39  
40  
41  
42  
43  
44  
45  
46  
47  
48  
49  
50  
51  
52  
53  
54  
55  
56  
57  
58  
59  
60

For peer review only

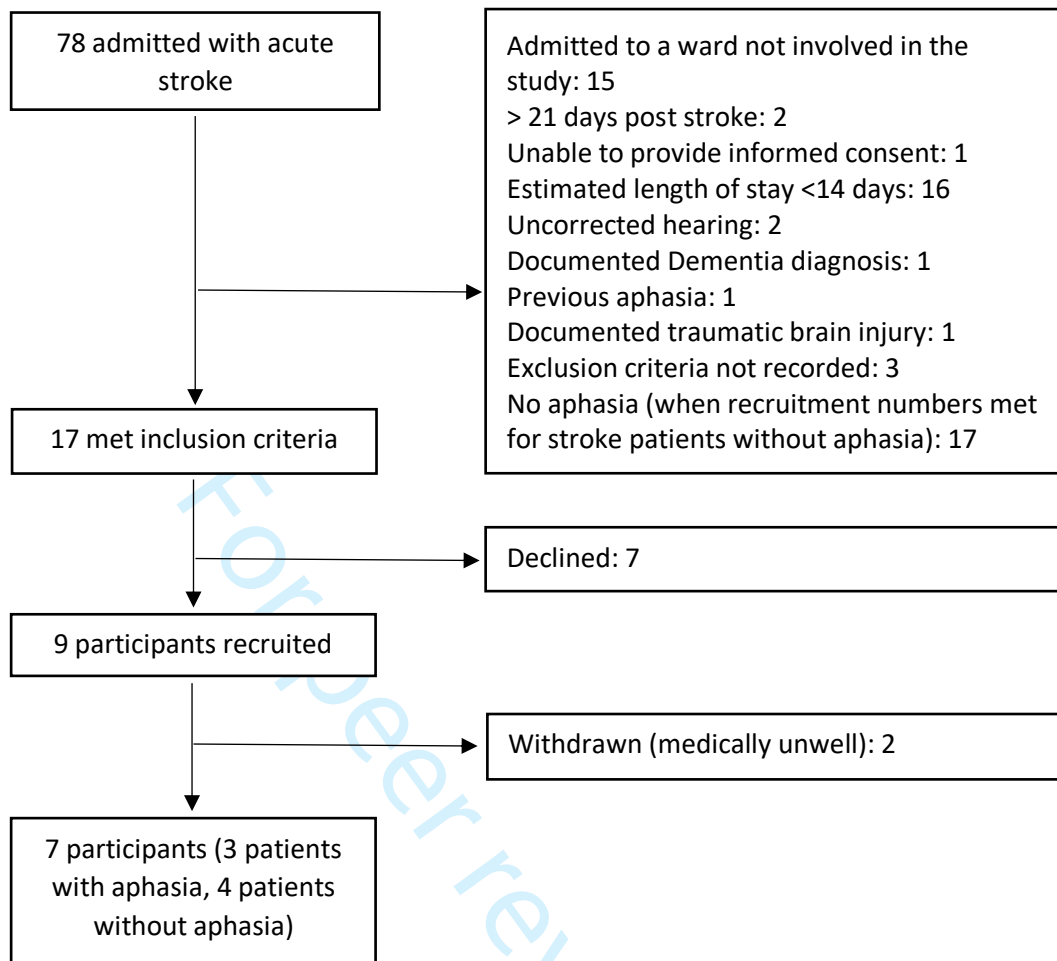

Figure 1. Summary of patient screening and recruitment

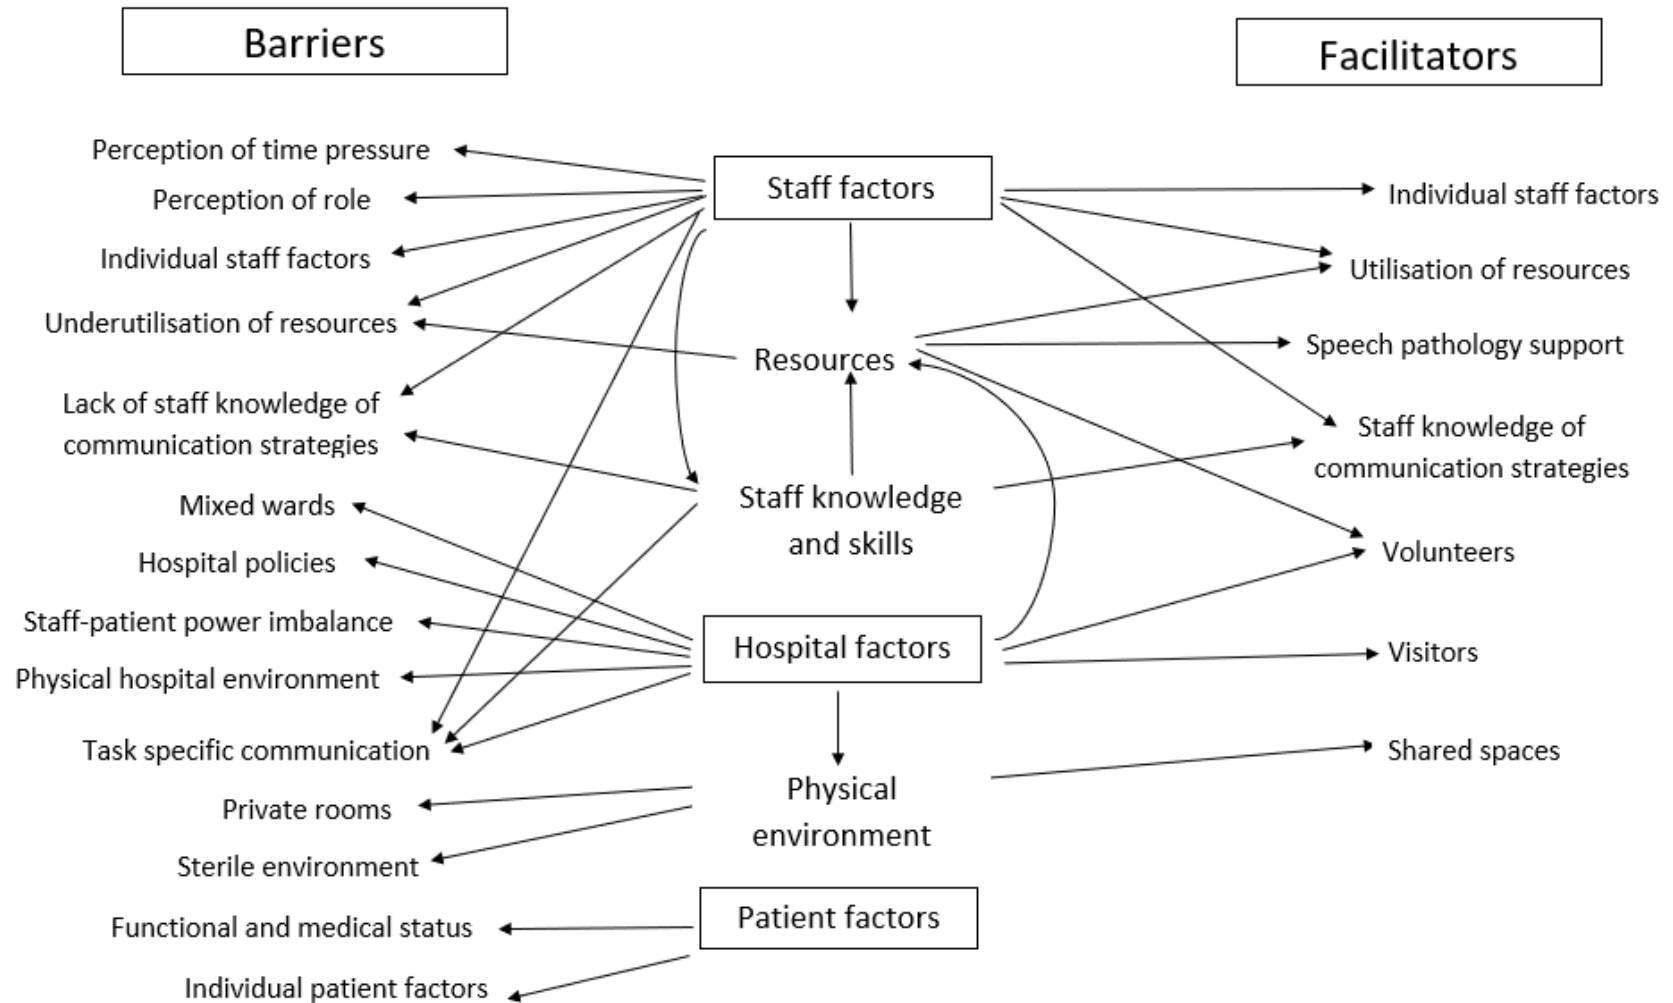

Figure 2. Summary of themes and subthemes of staff and patient perceptions to barriers and facilitators to patient following stroke.



**Appendix A.****Investigating Communication Enhanced Environments after stroke: Staff focus group guide**

What kind of language activities or language tasks do stroke patients currently participate in on the ward?

What kind of language activities or language tasks would you like see stroke patients have access to on the wards?

Describe your experience of communicating with stroke patients at the moment.

Can you tell me about anything that facilitates your ability to communicate with stroke patients on the ward?

Can you tell me about any barriers you experience that impact your ability to communicate with stroke patients on the ward?

What changes would you like to see to enhance communication between staff and stroke patients on the ward?

What changes would you like to see to enhance communication between visitors and stroke patients on the ward?

How could we enhance or optimise communication and language tasks and activities for stroke patients on the ward?

What do you think a communication and language enhanced stroke ward environment might look like?

**Appendix B.****Investigating Communication Enhanced Environments after stroke: Patient interview guide**

Tell me about what kind of activities you do while you are here (in hospital).

Describe your experience of communicating with people on the ward.

What makes it easier to communicate with people on the ward?

What makes it hard to communicate with people on the ward?

What can we do to make communicating with people easier?

## Appendix C.

## Consolidated criteria for reporting qualitative studies (COREQ): 32-item checklist

| No Item                                     | Guide questions/description                                                                                                               | Location within paper                                                   |
|---------------------------------------------|-------------------------------------------------------------------------------------------------------------------------------------------|-------------------------------------------------------------------------|
| Domain 1: Research team and reflexivity     |                                                                                                                                           |                                                                         |
| Personal Characteristics                    |                                                                                                                                           |                                                                         |
| 1. Interviewer/facilitator                  | Which author/s conducted the interview or focus group?                                                                                    | Page 10                                                                 |
| 2. Credentials                              | What were the researcher's credentials? E.g. PhD, MD                                                                                      | Page 10                                                                 |
| 3. Occupation                               | What was their occupation at the time of the study?                                                                                       | Page 10                                                                 |
| 4. Gender                                   | Was the researcher male or female?                                                                                                        | Page 10                                                                 |
| 5. Experience and training                  | What experience or training did the researcher have?                                                                                      | Page 10                                                                 |
| Relationship with participants              |                                                                                                                                           |                                                                         |
| 6. Relationship established                 | Was a relationship established prior to study commencement?                                                                               | Page 7                                                                  |
| 7. Participant knowledge of the interviewer | What did the participants know about the researcher? e.g. personal goals, reasons for doing the research                                  | Supplementary files, participant information and consent forms, page 10 |
| 8. Interviewer characteristics              | What characteristics were reported about the interviewer/facilitator? e.g. Bias, assumptions, reasons and interests in the research topic | Page 10                                                                 |
| Domain 2: study design                      |                                                                                                                                           |                                                                         |
| Theoretical framework                       |                                                                                                                                           |                                                                         |

|                                          |                                                                                                                                                          |                        |
|------------------------------------------|----------------------------------------------------------------------------------------------------------------------------------------------------------|------------------------|
| 9. Methodological orientation and Theory | What methodological orientation was stated to underpin the study? e.g. grounded theory, discourse analysis, ethnography, phenomenology, content analysis | Page 13                |
| Participant selection                    |                                                                                                                                                          |                        |
| 10. Sampling                             | How were participants selected? e.g. purposive, convenience, consecutive, snowball                                                                       | Page 8, 10             |
| 11. Method of approach                   | How were participants approached? e.g. face-to-face, telephone, mail, email                                                                              | Page 8, 10             |
| 12. Sample size                          | How many participants were in the study?                                                                                                                 | Page 8, 10             |
| 13. Non-participation                    | How many people refused to participate or dropped out? Reasons?                                                                                          | Figure 1, page 8       |
| 14. Setting                              | Setting of data collection Where was the data collected? e.g. home, clinic, workplace                                                                    | Page 7-8               |
| 15. Presence of non-participants         | Was anyone else present besides the participants and researchers?                                                                                        | Page 11                |
| 16. Description of sample                | What are the important characteristics of the sample? e.g. demographic data, date                                                                        | Table 2, page 12       |
| Data collection                          |                                                                                                                                                          |                        |
| 17. Interview guide                      | Were questions, prompts, guides provided by the authors? Was it pilot tested?                                                                            | Appendix A, Appendix B |
| 18. Repeat interviews                    | Were repeat interviews carried out? If yes, how many?                                                                                                    | NA                     |
| 19. Audio/visual recording               | Did the research use audio or visual recording to collect the data?                                                                                      | Page 10                |
| 20. Field notes                          | Were field notes made during and/or after the interview or focus group?                                                                                  | Page 10                |
| 21. Duration                             | What was the duration of the interviews or focus group?                                                                                                  | Page 11                |

|                                    |                                                                                                                                   |            |
|------------------------------------|-----------------------------------------------------------------------------------------------------------------------------------|------------|
| 22. Data saturation                | Was data saturation discussed?                                                                                                    | Page 5     |
| 23. Transcripts returned           | Were transcripts returned to participants for comment and/or correction?                                                          | No         |
| Domain 3: analysis and findings    |                                                                                                                                   |            |
| Data analysis                      |                                                                                                                                   |            |
| 24. Number of data coders          | How many data coders coded the data?                                                                                              | Page 13    |
| 25. Description of the coding tree | Did authors provide a description of the coding tree?                                                                             | Figure 2   |
| 26. Derivation of themes           | Were themes identified in advance or derived from the data?                                                                       | Page 13    |
| 27. Software                       | What software, if applicable, was used to manage the data?                                                                        | Page 13    |
| 28. Participant checking           | Did participants provide feedback on the findings?                                                                                | Page 13    |
| Reporting                          |                                                                                                                                   |            |
| 29. Quotations presented           | Were participant quotations presented to illustrate the themes / findings? Was each quotation identified? e.g. participant number | Page 14-20 |
| 30. Data and findings consistent   | Was there consistency between the data presented and the findings?                                                                | Page 14-20 |
| 31. Clarity of major themes        | Were major themes clearly presented in the findings?                                                                              | Figure 2   |
| 32. Clarity of minor themes        | Is there a description of diverse cases or discussion of minor themes?                                                            | Page 14-20 |

1 **Investigating a Communication Enhanced Environment (CEE) model early after stroke: A before-after non-**  
2 **randomised controlled pilot study.**

3  
4 **Study protocol version 1 19.05.20**

5  
6  
7 **Edith Cowan University**

8  
9  
10  
11 **Chief Investigator**

12 Sarah D'Souza

13 PhD student

14 School of Psychology and Social Sciences

15 Edith Cowan University

16 270 Joondalup Drive,

17 JOONDALUP WA 6027

18 s.dsouza@ecu.edu.au

19  
20  
21  
22  
23  
24  
25  
26  
27  
28  
29  
30  
31 **Co-Investigators**

32 Associate Professor Erin Godecke, Edith Cowan University

33 Associate Professor Natalie Ciccone, Edith Cowan University

34 Dr Heidi Janssen, Hunter New England Local Health District, NSW Health

35 Associate Professor Deborah Hersh, Edith Cowan University

36 Professor Elizabeth Armstrong, Edith Cowan University

37  
38  
39  
40  
41  
42  
43  
44  
45  
46  
47 **Site Investigators**

48 Claire Tucak, Hollywood Private Hospital

49 Sarah Wynn, Hollywood Private Hospital

50 Millie Gallan-Dwyer, Hollywood Private Hospital

## Table of Contents

|    |                                                           |           |
|----|-----------------------------------------------------------|-----------|
| 1  |                                                           |           |
| 2  |                                                           |           |
| 3  | <b>1. Abbreviations and Definitions of Terms.....</b>     | <b>3</b>  |
| 4  |                                                           |           |
| 5  | <b>2. Protocol Synopsis.....</b>                          | <b>4</b>  |
| 6  |                                                           |           |
| 7  | <b>3. Introduction.....</b>                               | <b>7</b>  |
| 8  |                                                           |           |
| 9  | <b>4. Objectives.....</b>                                 | <b>7</b>  |
| 10 |                                                           |           |
| 11 | <b>5. Study Design.....</b>                               | <b>7</b>  |
| 12 |                                                           |           |
| 13 | <b>6. Study Population.....</b>                           | <b>7</b>  |
| 14 |                                                           |           |
| 15 | <b>7. Study Assessment and Procedures.....</b>            | <b>8</b>  |
| 16 |                                                           |           |
| 17 | <b>8. Study Treatment.....</b>                            | <b>8</b>  |
| 18 |                                                           |           |
| 19 | <b>9. Participant Completion and Discontinuation.....</b> | <b>9</b>  |
| 20 |                                                           |           |
| 21 | <b>10. Data Analysis.....</b>                             | <b>9</b>  |
| 22 |                                                           |           |
| 23 | <b>11. Data Management.....</b>                           | <b>9</b>  |
| 24 |                                                           |           |
| 25 | <b>12. Study Report.....</b>                              | <b>10</b> |
| 26 |                                                           |           |
| 27 | <b>13. Administration Procedures.....</b>                 | <b>10</b> |
| 28 |                                                           |           |
| 29 | <b>14. References.....</b>                                | <b>11</b> |
| 30 |                                                           |           |
| 31 | <b>Appendix A. Behavioural mapping tool.....</b>          | <b>12</b> |
| 32 |                                                           |           |
| 33 | <b>Appendix B. Patient interview guide.....</b>           | <b>13</b> |
| 34 |                                                           |           |
| 35 | <b>Appendix C. Staff focus group guide.....</b>           | <b>14</b> |
| 36 |                                                           |           |
| 37 |                                                           |           |
| 38 |                                                           |           |
| 39 |                                                           |           |
| 40 |                                                           |           |
| 41 |                                                           |           |
| 42 |                                                           |           |
| 43 |                                                           |           |
| 44 |                                                           |           |
| 45 |                                                           |           |
| 46 |                                                           |           |
| 47 |                                                           |           |
| 48 |                                                           |           |
| 49 |                                                           |           |
| 50 |                                                           |           |
| 51 |                                                           |           |
| 52 |                                                           |           |
| 53 |                                                           |           |
| 54 |                                                           |           |
| 55 |                                                           |           |
| 56 |                                                           |           |
| 57 |                                                           |           |
| 58 |                                                           |           |
| 59 |                                                           |           |
| 60 |                                                           |           |

# 1 Abbreviations and Definitions of Terms

**CEE model:** Communication Enhanced Environment model, an adapted model of an Enriched Environment, an environment that provides stroke patients opportunities to engage in language activities during inpatient rehabilitation.

**PWA:** Patients following stroke with aphasia.

**PWOA:** Patients following stroke without aphasia.

**Language activities:** Language tasks that consist of solitary or interactive language activities.

**Solitary language activities:** Activities that may promote aphasia recovery such as reading, writing, listening to the radio, and the use of iPad applications.

**Interactive language activities:** activities which are based in communicative interactions that involve an exchange of information with a communication partner involving talking, gesture and/or facial expression, reading, writing or drawing to communicate.

**EE:** Enriched Environment, an environment that promotes physical, cognitive and social activity.



## 2. Protocol Synopsis

|                                   |                                                                                                                                                                                                                                                                                                                                                                                                                                                                                                                                                                                                                                                                                                                                                                                                                                                                                                                                                                                                                                                                                                                                                                                                                                                                                                                                                                                                                                                                                                                                                                                                                                                                                                                                                                                                                                                                                                                                                                                                                                                                                                                                                                                                                                                                                                                                                                                                                                                                                                                                                                                                                                                                                                                                                                                                                                                                                                                                                                                                                                                                                            |
|-----------------------------------|--------------------------------------------------------------------------------------------------------------------------------------------------------------------------------------------------------------------------------------------------------------------------------------------------------------------------------------------------------------------------------------------------------------------------------------------------------------------------------------------------------------------------------------------------------------------------------------------------------------------------------------------------------------------------------------------------------------------------------------------------------------------------------------------------------------------------------------------------------------------------------------------------------------------------------------------------------------------------------------------------------------------------------------------------------------------------------------------------------------------------------------------------------------------------------------------------------------------------------------------------------------------------------------------------------------------------------------------------------------------------------------------------------------------------------------------------------------------------------------------------------------------------------------------------------------------------------------------------------------------------------------------------------------------------------------------------------------------------------------------------------------------------------------------------------------------------------------------------------------------------------------------------------------------------------------------------------------------------------------------------------------------------------------------------------------------------------------------------------------------------------------------------------------------------------------------------------------------------------------------------------------------------------------------------------------------------------------------------------------------------------------------------------------------------------------------------------------------------------------------------------------------------------------------------------------------------------------------------------------------------------------------------------------------------------------------------------------------------------------------------------------------------------------------------------------------------------------------------------------------------------------------------------------------------------------------------------------------------------------------------------------------------------------------------------------------------------------------|
| <p><b>Study Title:</b></p>        | <p>Investigating a Communication Enhanced Environment model on acute and rehabilitation wards early after stroke: A before-after non-randomised controlled pilot study</p>                                                                                                                                                                                                                                                                                                                                                                                                                                                                                                                                                                                                                                                                                                                                                                                                                                                                                                                                                                                                                                                                                                                                                                                                                                                                                                                                                                                                                                                                                                                                                                                                                                                                                                                                                                                                                                                                                                                                                                                                                                                                                                                                                                                                                                                                                                                                                                                                                                                                                                                                                                                                                                                                                                                                                                                                                                                                                                                 |
| <p><b>Study type:</b></p>         | <p>Interventional</p>                                                                                                                                                                                                                                                                                                                                                                                                                                                                                                                                                                                                                                                                                                                                                                                                                                                                                                                                                                                                                                                                                                                                                                                                                                                                                                                                                                                                                                                                                                                                                                                                                                                                                                                                                                                                                                                                                                                                                                                                                                                                                                                                                                                                                                                                                                                                                                                                                                                                                                                                                                                                                                                                                                                                                                                                                                                                                                                                                                                                                                                                      |
| <p><b>Study Intervention:</b></p> | <p>A Communication Enhanced Environment (CEE) model will be developed from pre-intervention observations of inpatient language activities and investigations of barriers and facilitators to communication together through focus groups with hospital staff and interviews with patients on the acute and rehabilitation wards.</p> <p>Sixteen patients following stroke will be recruited in this prospective before-after non-randomised controlled pilot study set in an acute and a rehabilitation ward of a metropolitan private hospital. The study includes: i) The baseline phase which involves observation of patients following stroke (n=8, 4 patients with aphasia (PWA) and 4 patients without aphasia (PWOA)); the collection of qualitative data through focus groups and semi-structured interviews to determine patient and staff perceived barriers and facilitators to communication; ii) the implementation phase where a CEE model will be developed and embedded in usual care; iii) the post-implementation phase which will involve repeated baseline data collection on a different cohort of patients (n=8, 4 PWA and 4 PWOA) to determine i) how solitary and interactive language activity levels changed following implementation of the CEE model, ii) the differences post CEE implementation in hospital staff's use of communication promoting strategies when interacting with patients, iii) the differences post CEE implementation in staff and patient perceptions of the barriers and facilitators to inpatient language activities.</p> <p>The CEE model will include the provision of:</p> <p>i) CEE model equipment, for example reading materials such as books and magazines, and access and encouragement to reside in a communal dining area;</p> <p>ii) CEE model education, support and training for staff with the aim to develop the ability to facilitate language activities for patients after stroke. The training program will be guided by research evidence, expert opinion and baseline data. Staff will complete a questionnaire pre and post training to determine changes in their knowledge, skills and attitudes regarding communication and aphasia.</p> <p><b>Control treatment:</b> Patients following stroke with and without aphasia will be observed and video recorded over two week days and one weekend day pre (n=8) and post (n=8) implementation of a CEE model. Behavioural mapping will record patient interactive and solitary language activity observed within the first minute of 5-minute intervals in 4-hour time periods between 7am and 7pm. <i>Solitary language activities</i> are activities that may promote aphasia recovery such as reading, writing, listening to the radio, and the use of iPad applications. <i>Interactive language activities</i> are activities which are based in communicative interactions that involve an exchange of information with a communication partner involving talking, gesture and/or facial expression, reading, writing or drawing to communicate.</p> |

|                                        |                                                                                                                                                                                                                                                                                                                                                                                                                                                                                                                                                                                                                                                                                                                                                                                                                                                                                                                                                                                                       |
|----------------------------------------|-------------------------------------------------------------------------------------------------------------------------------------------------------------------------------------------------------------------------------------------------------------------------------------------------------------------------------------------------------------------------------------------------------------------------------------------------------------------------------------------------------------------------------------------------------------------------------------------------------------------------------------------------------------------------------------------------------------------------------------------------------------------------------------------------------------------------------------------------------------------------------------------------------------------------------------------------------------------------------------------------------|
| <p><b>Objectives of the Study:</b></p> | <p>This study aims to investigate a CEE model on an acute and rehabilitation ward and if stakeholders perceive a CEE model as valuable by addressing the following research questions:</p> <ul style="list-style-type: none"> <li>- Does a CEE model increase the amount of time PWA and PWOA spend in participating in solitary and interactive language activities on acute and rehabilitation wards during the early post-stroke period?</li> <li>- What are the differences in patients' experience of communication in a CEE model compared to patients' experience of communication in a standard environment on in-patient acute and rehabilitation wards?</li> <li>- What is the experience of implementing a CEE model for staff working with PWA and PWOA within in-patient acute and rehabilitation wards?</li> <li>- Do staffs' perceptions of their knowledge of, skills with, and attitude towards communication and aphasia change following implementation of a CEE model?</li> </ul> |
| <p><b>Number of Centres:</b></p>       | <p>1</p>                                                                                                                                                                                                                                                                                                                                                                                                                                                                                                                                                                                                                                                                                                                                                                                                                                                                                                                                                                                              |
| <p><b>Study duration:</b></p>          | <p>5 years</p>                                                                                                                                                                                                                                                                                                                                                                                                                                                                                                                                                                                                                                                                                                                                                                                                                                                                                                                                                                                        |
| <p><b>Study Hypothesis:</b></p>        | <p>A CEE model will increase patient engagement in solitary and interactive language activities and improve staff and patient experiences of communication compared to a standard ward environment.</p>                                                                                                                                                                                                                                                                                                                                                                                                                                                                                                                                                                                                                                                                                                                                                                                               |
| <p><b>Primary outcomes:</b></p>        | <p>The primary outcome is the change in the proportion of solitary and interactive language activities as a percentage of total observed activity after the implementation of the CEE model.</p> <p>Timepoint: Patient observations completed within 21 days post stroke.</p>                                                                                                                                                                                                                                                                                                                                                                                                                                                                                                                                                                                                                                                                                                                         |
| <p><b>Secondary outcomes:</b></p>      | <p>The differences post CEE model implementation in staff and patient perceptions of the barriers and facilitators to inpatient language activities.</p> <p>Timepoint: Within 18 months of embedding the CEE model.</p>                                                                                                                                                                                                                                                                                                                                                                                                                                                                                                                                                                                                                                                                                                                                                                               |
| <p><b>Study design:</b></p>            | <p>Before-after non-randomised pilot study</p>                                                                                                                                                                                                                                                                                                                                                                                                                                                                                                                                                                                                                                                                                                                                                                                                                                                                                                                                                        |
| <p><b>Key inclusion criteria:</b></p>  | <p>Patients will be eligible for inclusion if they have/are: admitted to the acute or rehabilitation ward for a stroke, less than 21 days post stroke during baseline phase or post-implementation phase, the ability to provide informed consent as determined by the medical team, a Glasgow Coma Scale<sup>1</sup> score greater than 10 at the time of screening, an estimated length of hospital stay greater than 14 days, adequate English proficiency to participate in semi-structured interviews and are above 18 years of age. Patients with aphasia will also have an Aphasia Quotient below 93.7 on the Western Aphasia Battery-Revised.<sup>2</sup></p> <p>Staff participants: One representative from each acute and rehabilitation staff group including medical, nursing, volunteers, and allied health staff members (n=17), who are over 18 years old.</p>                                                                                                                         |
| <p><b>Key exclusion criteria:</b></p>  | <p>Patients will be excluded if they have/are: uncorrected hearing or vision, not medically stable, a documented diagnosis of dementia, traumatic brain injury or previous aphasia, a documented current untreated depression at the time of acute admission or are a participant in another research trial which may affect this study's outcome measures.</p>                                                                                                                                                                                                                                                                                                                                                                                                                                                                                                                                                                                                                                       |
| <p><b>Study Procedures:</b></p>        | <p><b>Baseline phase:</b> Eligible patients during the baseline phase will be observed and video recorded for 4 hours on 3 consecutive days (one weekend and two weekdays) and will complete a semi-structured interview to explore their experiences of communication, and their perceptions of barriers and facilitators to inpatient language activities during their inpatient admission.</p>                                                                                                                                                                                                                                                                                                                                                                                                                                                                                                                                                                                                     |

|                                      |                                                                                                                                                                                                                                                                                                                                                                                                                                                                                                                                                                                                                                                                                                                                                                                                                   |
|--------------------------------------|-------------------------------------------------------------------------------------------------------------------------------------------------------------------------------------------------------------------------------------------------------------------------------------------------------------------------------------------------------------------------------------------------------------------------------------------------------------------------------------------------------------------------------------------------------------------------------------------------------------------------------------------------------------------------------------------------------------------------------------------------------------------------------------------------------------------|
|                                      | <p>Staff will participate in a one-hour focus group to explore their perceptions of barriers and facilitators to inpatient language activities. A focus group interview schedule will be used across all focus groups.</p> <p><b>Implementation phase:</b> The CEE model will be implemented within the acute and rehabilitation wards.</p> <p><b>Post-implementation phase:</b> Intervention group patient observations and interviews, and staff focus groups will replicate baseline data collection.</p>                                                                                                                                                                                                                                                                                                      |
| <b>Safety parameters</b>             | <p>Patients and/or their significant others may experience increased levels of distress during recruitment and/or data collection. This may be the result of adjustment following stroke and/or diagnosis of aphasia and increased awareness of impairment. No other risks known regarding participation in this project. The baseline assessments and interview will be conducted by the Chief Investigator who has experience in supporting patients during this early stage of stroke recovery. If a patient or any significant others becomes upset or distressed, the assessment or interview will be paused with the option to discontinue and counselling strategies will be provided.</p>                                                                                                                 |
| <b>Statistical methods /analysis</b> | <p>Patient demographic and stroke characteristics will be presented using descriptive statistics. One-way ANOVA or the Kruskal-Wallis and chi-square tests will examine differences in characteristics between groups. Time spent observed in interactive and solitary language activities will be expressed as a percentage of total observations. A mixed design ANOVA will be used to calculate the within-subjects variable of presence of aphasia and the between-subjects variable of a CEE on language activity levels of patients by comparing baseline to intervention phase observations. A qualitative description research approach will be used for the qualitative component of this research. The mixed methods design will enable the triangulation of the qualitative and quantitative data.</p> |
| <b>Sample size determination:</b>    | <p>The patient sample size was selected for this pilot study to collect data across each observation period for each patient group in the baseline and intervention phases (see document: Observation_protocol_SD_version 3_23-02-16). The sample size for staff participants was selected to capture a sufficient breadth of professional perspectives.</p>                                                                                                                                                                                                                                                                                                                                                                                                                                                      |

### 3. Introduction

Aphasia is an acquired communication disorder that affects approximately 30% of first ever ischaemic stroke survivors<sup>3</sup> and persists in up to 61% of survivors one-year post stroke.<sup>4</sup> Aphasia impacts all communication modalities with significant negative consequences for social participation, interpersonal relationships, autonomy, capacity to work and quality of life.<sup>5</sup>

Patients following stroke with aphasia (PWA) have been observed to spend less than 28% of their day communicating and 44% of their day alone during their first weeks of inpatient rehabilitation.<sup>6</sup> Inadequate opportunities for communication places PWA at risk of developing maladaptive behaviours such as learned non-use of language.<sup>7</sup>

Environmental Enrichment (EE) refers to conditions which promote physical, cognitive and social activity and has been shown in animal models of stroke to enhance neuroplasticity<sup>8</sup>, promote better learning and memory and contribute to significant improvements in motor function.<sup>9</sup> The human equivalent model<sup>10</sup> in a rehabilitation unit results in patients spending more time engaged in activity and less time sleeping and alone.<sup>11</sup>

### 4. Objectives

Aphasia is a complex language impairment and PWA may need additional support within an Enriched Environment. This pilot study seeks to develop and test an adapted model of an Enriched Environment, a Communication Enhanced Environment (CEE), as a strategy to provide PWA and patients following stroke without aphasia (PWOA) more opportunities to engage in language activities during inpatient rehabilitation. Within this study language activities include both *solitary activities* that may promote aphasia recovery such as reading, writing, listening to the radio, and the use of iPad applications, and *interactive activities* which are based in communicative interactions that involve an exchange of information with a communication partner involving talking, gesture and/or facial expression, reading, writing or drawing to communicate.

#### 4.1 Hypotheses

A CEE will increase patient solitary and interactive language activities and improve staff and patient experiences of communication compared to a standard ward environment.

### 5. Study design

This mixed methods pilot study is a prospective before-after non-randomised controlled design in an acute and a rehabilitation ward of a metropolitan private hospital. The study involves three phases:

- i) *Baseline*: observe and quantify the current ward environment;
- ii) *Implementation* of the CEE model;
- iii) *Post-implementation*: assess the impact of the CEE model.

### 6. Study Population

- i) *Patients*: The baseline group (n=8, 4 PWA, 4 PWOA) recruited within the baseline phase, and the intervention group (n=8, 4 PWA, 4 PWOA) recruited during the post-implementation phase.

- 1 ii) *Staff participants*: One representative from each acute and rehabilitation staff group including medical,  
2 nursing, volunteers, and allied health staff members (n=17), who are over 18 years old.

### 3 **6.1 inclusion and exclusion criteria**

4 Patients will be eligible for inclusion if they have/are: admitted to the acute or rehabilitation ward for a  
5 stroke, less than 21 days post stroke during baseline phase or intervention phase, the ability to provide informed  
6 consent as determined by the medical team, a Glasgow Coma Scale<sup>1</sup> score greater than 10 at the time of screening,  
7 an estimated length of hospital stay greater than 14 days, adequate English proficiency to participate in semi-  
8 structured interviews and are above 18 years of age. Patients with aphasia will also have an Aphasia Quotient below  
9 93.7 on the Western Aphasia Battery-Revised.<sup>2</sup>

10 Patients will be excluded if they have/are: uncorrected hearing or vision, not medically stable, a documented  
11 diagnosis of dementia, traumatic brain injury or previous aphasia, a documented current untreated depression at  
12 the time of acute admission or are a participant in another research trial which may affect any of this study's  
13 outcome measures.

14 Staff and volunteers who are over 18 years old will be eligible to participate in this study.

## 15 **7. Study Assessments and Procedures**

### 16 **Baseline**

17 All recruited patients will complete the Montreal Cognitive Assessment,<sup>11</sup> and The NIH Stroke Scale.<sup>12</sup> PWA  
18 will also complete the Western Aphasia Battery-Revised.<sup>2</sup> Patients' behaviour will be observed and video recorded  
19 for four hours per day on a Sunday, Monday and Tuesday between 7am to 7pm. A behaviour mapping tool  
20 (Appendix A) developed for this study will record patient engagement in language activities in the first minute of  
21 each five-minute interval across each four-hour observation period. Semi-structured interviews will explore patients'  
22 perceptions of barriers and facilitators to inpatient language activities. An interview schedule will be used across all  
23 interviews (Appendix B.). Supportive communication strategies will be used to facilitate PWA participation in  
24 interviews with transcriptions annotated to capture any non-verbal responses.

25 Staff will participate in a one-hour focus group to explore their perceptions of barriers and facilitators to  
26 inpatient language activities. A focus group/interview schedule (Appendix C.) will be used across all focus groups.

### 27 **Implementation**

28 The CEE model will be implemented within the acute and rehabilitation wards.

### 29 **Post implementation**

30 Intervention group patient observations and interviews, and staff focus groups will replicate baseline data  
31 collection.

## 32 **8. Study Treatment**

33 The CEE model incorporates the following strategies to encourage engagement in language activities:

- 34 i) Staff training to facilitate patients' communication and provide opportunities to engage in language  
35 activities;
- 36 ii) Patient access to:

- a) Communication enhancement resources such as iPads and audiobooks;
- b) Communal areas to facilitate engagement amongst patients.

## 9. Participant Completion and Discontinuation

### 9.1 Participant Completion

Participants will have completed the study when they have completed the semi-structured interview.

### 9.2 Participant withdrawal

Participation in this study is voluntary. The participant can withdraw from taking part in the study at any time without giving a reason for withdrawing.

## 10. Data analysis

### 10.1 Primary Analysis

The proportion of observed episodes where PWA and PWOA are engaged in language activities at baseline and post implementation will be analysed using a mixed design ANOVA.

### 10.2 Secondary Analysis

The differences in staff and patient perceptions of the barriers and facilitators to inpatient language activities and communication post CEE implementation will be analysed through a qualitative description approach. Triangulation of the qualitative and quantitative data will be conducted.

## 11. Data management

The data collected will be confidential. No identifying information will be attached to the data and any information that may reveal participant's identity will be removed. The master list of participant names and codes will be kept in a locked filing cabinet at the hospital site which will only be accessible by the research team. All data will be accessed, used and stored in accordance with Commonwealth Privacy Laws. The de-identified data will be stored on a password-controlled computer and/or in a locked cabinet at Edith Cowan University. Electronic data will be backed up on a password controlled hard drive only accessible by the Chief Investigator.

The data collected from this study will have a significant contribution to the aphasia research area and therefore will be stored for 15 years following the completion of this study. Data may be accessed for future studies by the study investigators or higher degrees by research (HDR). In the case of HDR use of the data, the use of the data will be bound by a two-way confidentiality agreement. The data may be used for teaching purposes only with the additional written permission from participants. The data may be made accessible to consumer groups (for example the Australian Aphasia Association) and information may be made available through the National Stroke Foundation and scientific journals. Confidentiality will be maintained in all circumstances. Non-identifiable data will be accessible by researchers through data sharing archives. This data will be governed by an overarching body to ensure data are only used for approved purposes. Researchers who access this data from the data bank will not have access to the participant keys that attach participants to codes therefore data will only be re-identifiable by the Chief Investigator. Data will be deleted from electronic storage and hard copy data will be shredded by the chief



investigator after 15 years completion of the research study (with Ethics Committee approval, Ethics approval numbers: HPH431 and ECU HREC 12149). Non-identifiable data will be added to data archives for data sharing. Researchers who access data archives will not have access to information attaching participants to coded data.

## 12. Study Report

This study will be published in a PhD thesis as part of the Chief Investigator's Higher Research Degree. Outcomes from this study will be published in peer review journals and at conferences.

## 13. Administration Procedures

### 13.1 Ethical Considerations

This research is likely to have a significant impact on aphasia recovery following stroke and will form the basis for future study designs. This study will develop a teaching and learning package that can be used in the future to facilitate and promote increased levels of communication activity during early stroke recovery. The implementation of a CEE may address missed opportunities for language stimulation, harness increased levels of neuroplasticity and optimise aphasia language recovery after stroke. The benefit of a CEE may extend beyond patients with aphasia and may improve health care experience and communication access for all patients following stroke. Additionally, these benefits may extend beyond patients involved in the study as trained staff may use skills and knowledge obtained in the training program to enhance the communication environment of all patients they care for.

### 13.2 Ethical Review Committee

All processes and documentation used within this study will be reviewed and approved by the Edith Cowan University Research Ethics Committee and the site Ethics Committee. The Chief Investigator will complete the annual ethics reports and will be responsible for reporting any adverse events to the Ethics Committees.

### 13.3 Informed Consent

Participants will be excluded if they do not have adequate English proficiency to participate in semi-structured interviews and focus groups. Any participants that require an interpreter will be excluded from inclusion in this study as determined by the medical team.

Patients with aphasia will be provided with aphasia friendly information sheets and consent forms with simple language, bold key words and pictorial support. This will be read and explained by the researcher. Supported conversation strategies will be used to support and facilitate patients with aphasia's involvement and understanding of the research process, informed consent and their rights to withdraw at any time. This will be provided by the Chief Investigator who is a qualified speech pathologist with experience in communicating with patients with aphasia using supported conversation techniques to facilitate and support communication. A detailed information will also be provided to the 'person responsible' for all patients.

### 13.4 Protocol Amendments

All protocol amendments will be reviewed and accepted by the Edith Cowan University Research Ethics Committee and the site research Ethics Committee.

## 14. References

1. Teasdale G, Jennett B. Assessment of coma and impaired consciousness. A practical scale. *Lancet*. 1974;2(7872): 81–4.
2. Kertesz A. *Western Aphasia Battery- Revised*. San Antonio, TX, Harcourt Assessment; 2006.
3. Engelter AT, Gostynski M, Papa S, et al. Epidemiology of aphasia attributable to first ischemic stroke. *Stroke*. 2006 Mar 9;37: 1379-84.
4. Pederson PM, Jørgensen HS, Nakayama H, Raaschou HO, Olsen TS. Aphasia in acute stroke: Incidence, determinants, and recovery. *Annals of Neurology*. 1995 Oct;38(4): 659-66.
5. Kruithof WJ, van Mierlo ML, Visser-Meily JM, van Heugten CM, Post MW. Associations between social support and stroke survivors' health-related quality of life – a systematic review. *Patient Educ Couns*. 2013;93(2): 169–76.
6. Godecke E, Armstrong E, Hersh D, Bernhardt J. Missed Opportunities: Communicative interactions in early stroke recovery. *Stroke Society of Australasia Annual Scientific Meeting*. Hamilton Island, Queensland. 2014.
7. Nithianantharajah J, Hannan AJ. Enriched environments, experience dependent plasticity and disorders of the nervous system. *Nat Rev Neuroscience*. 2006;7(9): 697-709.
8. Janssen H, Bernhardt J, Collier JM, et al. An enriched environment improves sensorimotor function post-ischemic stroke. *Neurorehab Neural Re*, 2010;24(9), 802–813.
9. Janssen H, Ada L, Karayanidis F, et al. Translating the use of an enriched environment poststroke from bench to bedside: study design and protocol used to test the feasibility of environmental enrichment on stroke patients in rehabilitation. *Int J Stroke*. 2012;7: 521–526.
10. Janssen H, Ada L, Bernhardt J, et al. An enriched environment increases activity in stroke patients undergoing rehabilitation in a mixed rehabilitation unit: A pilot non-randomized controlled trial. *Disabil Rehabil*. 2014;36(3), 255–262.
11. Nasreddine ZS, Phillips NA, Bédirian, V, et al. The Montreal Cognitive Assessment, MoCA: A brief screening tool for mild cognitive impairment. *J Am Geriatr Soc*. 2005;53(4); 695-9.
12. NIH stroke scale [Internet]. Bethesda, Md, National Institute of Neurological Disorders and Stroke (U.S.). 2011 [cited 2016 Feb 10]. Available from [https://www.ninds.nih.gov/sites/default/files/NIH\\_Stroke\\_Scale.pdf](https://www.ninds.nih.gov/sites/default/files/NIH_Stroke_Scale.pdf)



## Appendix A. Behavioural mapping tool

| Time (5 min): _____                                                                         | NO LANGUAGE ACTIVITIES OBSERVED ( <i>describe</i> )                                                                                                             |                                                                                                                                                                                                                                                                                                                                             |                                                                                                                                                                                                                          | COMMENTS |
|---------------------------------------------------------------------------------------------|-----------------------------------------------------------------------------------------------------------------------------------------------------------------|---------------------------------------------------------------------------------------------------------------------------------------------------------------------------------------------------------------------------------------------------------------------------------------------------------------------------------------------|--------------------------------------------------------------------------------------------------------------------------------------------------------------------------------------------------------------------------|----------|
| Location (select one)                                                                       | People present                                                                                                                                                  | INTERACTIVE LANGUAGE ACTIVITIES                                                                                                                                                                                                                                                                                                             | 'OTHER' FUNCTIONAL LANGUAGE ACTIVITIES                                                                                                                                                                                   |          |
| Amenities<br>Bedroom<br>Hall<br>Therapy area<br>Family Mtg Room<br>Activity room            | Nurse<br>Personal care assistant<br>Doctor<br>Physio<br>OT<br>SP<br>DT<br>Social worker<br>Family/Friend<br>Other patient<br>Alone<br>Other ( <i>describe</i> ) | In person<br>Telephone<br>Therapy session/ward round<br>Other ( <i>describe</i> )<br><br><b>Patient</b><br>Verbal communication<br>Non-verbal gesture/facial expression ( <i>describe</i> )<br><br>Written aids ( <i>writing or reading (circle)</i> )<br>Pictorial aids ( <i>describe</i> )<br>Other communication aid ( <i>describe</i> ) | Typing/writing<br>Reading ( <i>describe</i> )<br><br>Texting (mobile phone)<br>Listening to radio/music<br>Watching TV<br>Internet use ( <i>describe</i> )<br><br>Word games with a partner<br>Other ( <i>describe</i> ) |          |
| <b>ON WARD</b><br>Doctor's room<br>Dining room<br>Communal area ( <i>describe</i> )         |                                                                                                                                                                 |                                                                                                                                                                                                                                                                                                                                             | <b>NON-FUNCTIONAL/ NON-PROPOSITIONAL LANGUAGE ACTIVITIES</b>                                                                                                                                                             |          |
| <b>OFF WARD</b><br>Outside<br>Off-unit ( <i>describe</i> )<br><br>Other ( <i>describe</i> ) |                                                                                                                                                                 | <b>Communication partner/s</b><br>Verbal communication<br>Non-verbal gesture/facial expression ( <i>describe</i> )<br><br>Written aids<br>Pictorial aids<br>Other communication aid ( <i>describe</i> )                                                                                                                                     | Singing<br>Word games (alone)<br>Language apps (alone)<br>Copying written letters, words, sentences (alone).                                                                                                             |          |
|                                                                                             |                                                                                                                                                                 |                                                                                                                                                                                                                                                                                                                                             | <b>OTHER</b>                                                                                                                                                                                                             |          |
|                                                                                             |                                                                                                                                                                 |                                                                                                                                                                                                                                                                                                                                             | Talking to observer<br>Talking to self: appropriate/inappropriate ( <i>describe</i> )                                                                                                                                    |          |
| Time (5 min): _____                                                                         | NO LANGUAGE ACTIVITIES OBSERVED ( <i>describe</i> )                                                                                                             |                                                                                                                                                                                                                                                                                                                                             |                                                                                                                                                                                                                          | COMMENTS |
| Location (select one)                                                                       | People present                                                                                                                                                  | INTERACTIVE LANGUAGE ACTIVITIES                                                                                                                                                                                                                                                                                                             | 'OTHER' FUNCTIONAL LANGUAGE ACTIVITIES                                                                                                                                                                                   |          |
| Amenities<br>Bedroom<br>Hall<br>Therapy area<br>Family Mtg Room<br>Activity room            | Nurse<br>Personal care assistant<br>Doctor<br>Physio<br>OT<br>SP<br>DT<br>Social worker<br>Family/Friend<br>Other patient<br>Alone<br>Other ( <i>describe</i> ) | In person<br>Telephone<br>Therapy session/ward round<br>Other ( <i>describe</i> )<br><br><b>Patient</b><br>Verbal communication<br>Non-verbal gesture/facial expression ( <i>describe</i> )<br><br>Written aids ( <i>writing or reading (circle)</i> )<br>Pictorial aids ( <i>describe</i> )<br>Other communication aid ( <i>describe</i> ) | Typing/writing<br>Reading ( <i>describe</i> )<br><br>Texting (mobile phone)<br>Listening to radio/music<br>Watching TV<br>Internet use ( <i>describe</i> )<br><br>Word games with a partner<br>Other ( <i>describe</i> ) |          |
| <b>ON WARD</b><br>Doctor's room<br>Dining room<br>Communal area ( <i>describe</i> )         |                                                                                                                                                                 |                                                                                                                                                                                                                                                                                                                                             | <b>NON-FUNCTIONAL/ NON-PROPOSITIONAL LANGUAGE ACTIVITIES</b>                                                                                                                                                             |          |
| <b>OFF WARD</b><br>Outside<br>Off-unit ( <i>describe</i> )<br><br>Other ( <i>describe</i> ) |                                                                                                                                                                 | <b>Communication partner/s</b><br>Verbal communication<br>Non-verbal gesture/facial expression ( <i>describe</i> )<br><br>Written aids<br>Pictorial aids<br>Other communication aid ( <i>describe</i> )                                                                                                                                     | Singing<br>Word games (alone)<br>Language apps (alone)<br>Copying written letters, words, sentences (alone).                                                                                                             |          |
|                                                                                             |                                                                                                                                                                 |                                                                                                                                                                                                                                                                                                                                             | <b>OTHER</b>                                                                                                                                                                                                             |          |
|                                                                                             |                                                                                                                                                                 |                                                                                                                                                                                                                                                                                                                                             | Talking to observer<br>Talking to self: appropriate/inappropriate ( <i>describe</i> )                                                                                                                                    |          |

## Appendix B. Patient interview guide

**Investigating Communication Enhanced Environments after stroke****Patient Interview guide, version 1\_11-8-15**

Tell me about what kind of activities you do while you are here (in hospital).

Describe your experience of communicating with people on the ward.

What makes it easier to communicate with people on the ward?

What makes it hard to communicate with people on the ward?

What can we do to make communicating with people easier?

For peer review only

Appendix C. Staff focus group guide.

**Investigating Communication Enhanced Environments after stroke**  
**Staff focus group guide, version 1\_27-7-15**

STAFF FOCUS GROUP GUIDE BASELINE PHASE

What kind of language activities or language tasks do stroke patients currently participate in on the ward?

What kind of language activities or language tasks would you like see stroke patients have access to on the wards?

Describe your experience of communicating with stroke patients at the moment.

Can you tell me about anything that facilitates your ability to communicate with stroke patients on the ward?

Can you tell me about any barriers you experience that impact your ability to communicate with stroke patients on the ward?

What changes would you like to see to enhance communication between staff and stroke patients on the ward?

What changes would you like to see to enhance communication between visitors and stroke patients on the ward?

How could we enhance or optimise communication and language tasks and activities for stroke patients on the ward?

What do you think a communication and language enhanced stroke ward environment might look like?

STAFF FOCUS GROUP GUIDE POST-IMPLEMENTATION PHASE

Describe your experience of communicating with stroke patients at the moment.

Can you tell me about any barriers you experience that impact your ability to communicate with stroke patients on the ward?

Describe the differences in the communication environment since implementing the model.

What changes did you see to enhance communication between staff and stroke patients on the ward?

What changes did you see to enhance communication between visitors and stroke patients on the ward?

What was it like to use the model?

How do you feel about the model?

Can you tell me about anything that helped you use the model with stroke patients on the ward?

Can you tell me about any barriers you experienced while implementing the model?

How can we improve the model?

## Communication Enhanced Environments after Stroke

### Study procedure version 2\_23-02-16

#### BASELINE:

*Staff recruitment:* The Chief Investigator will recruit staff participants through a verbal explanation of the study and the provision of the information sheets and written consent forms. Staff will be provided 48 hours to discuss the study and ask questions before consenting to participate. Staff interviews and focus groups will commence as staff participants are recruited. Staff will participate in a one-hour focus group or a one-hour semi-structured interview (in person or via telephone) to explore staff perceptions of environmental barriers and facilitators to language activity and communication on in-patient acute and rehabilitation wards.

*Patient recruitment:* All consecutively admitted patients following stroke during the baseline period will be screened for eligibility to participate in the study. The hospital site investigators will identify potential stroke participants that meet the inclusion and exclusion criteria. Stroke participants with aphasia will be identified by the hospital speech pathology or medical team as having a diagnosis of aphasia (aphasia diagnosis will be confirmed via Western Aphasia Battery-Revised (WAB-R)<sup>1</sup> Aphasia Quotient score <93.7 during data collection). The site investigators will approach potential participants and gain verbal consent from the patient to be approached by a member of the research team and have their 3-point identification released to the research team. This will be documented in the patient's integrated medical progress notes. Once verbal consent has been gained and documented, the site investigators will email the Chief Investigator the patient alert proforma identifying the patient as meeting the inclusion/exclusion criteria. The research team will liaise with the medical team to confirm the potential stroke participant meets the inclusion criteria: (i) admitted to the in-patient rehabilitation stroke unit for recent stroke, (ii) are less than 21 days post stroke and during baseline phase or intervention phase, (iii) have the ability to provide informed consent as determined by the medical team iv) Glasgow Coma Scale<sup>2</sup> greater than 10 at the time of screening, (v) have an estimated length of stay greater than 14 days and (vi) have adequate English proficiency to participate in semi-structured interviews. Patients will be excluded if they (i) have uncorrected hearing or vision (for example hearing impairment without hearing aids, vision impairment without glasses), (ii) are not medically stable, (iii) have a documented diagnosis of major depression or (iv) have a documented history of dementia or significant cognitive decline, traumatic brain injury or previous aphasia at the time of admission for the acute event, (v) or are a participant in a research study that will influence this study's outcomes. Stroke participant recruitment will follow the stroke participant consent procedure (see document: SD\_Communication Enhanced Environments after Stroke consent procedure version 1\_3-2-15). A record of identifying participant details attached to patient codes will be kept at the hospital site in a locked filing cabinet. An email summary of the baseline assessment results will be sent to the hospital speech pathology generic email address. The patient will be identified by patient code and ward/room number. The hospital speech pathology team will write a summary of the assessment results in the patient's integrated medical progress notes.

**Patient data collection:** All recruited stroke participants will complete the NIH Stroke Scale<sup>3</sup> (by someone trained in using this tool) and the Montreal Cognitive Assessment (MoCA).<sup>4</sup> Participants with aphasia will also complete an assessment of aphasia, the WAB-R<sup>1</sup> and provide a personal narrative language sample on their reason for admission to confirm a diagnosis of aphasia. After patient recruitment has been completed, the Chief Investigator and/or trained medical team members will recruit the patient's family, friends and significant others to consent to video recording and observations of their interactions with stroke participants.

Observations of stroke participants will commence 1-3 days after obtaining written consent. Patients' behaviour will be observed by the Chief Investigator or a Research Assistant, and video recorded for a total of 12 hours to enable behaviour mapping of video data (see document: Observation\_protocol\_SD\_version 3\_23-02-16). Patients will be observed and video recorded for 4 hours per day on weekend day and two consecutive weekdays between 7am to 7pm. The observation periods will be grouped into 4-hour observation intervals (e.g. 7am-11am, 11am-3pm and 3pm-7pm). Each day the patient will be observed and video recorded for one observation interval. The participant will be observed and video recorded during a different observation interval each day to gain a general insight into the patients' activities (see Figure 1. below). Patients who do not consent to video recording will be provided with the option of audio recording and manual observation conducted by the researcher to enable the collection of case notes regarding patient behaviour. An observational protocol developed for this study will be used to measure the frequency stroke participants engage in language activities. These will be categorised into *solitary language activities* for example reading, writing, listening to the radio, use of iPad applications, and *interactive language activities* defined as i) an interaction involving an exchange of information, ii) with a communication partner including gesture and/or facial expression, reading, writing or drawing for the purpose of communication and use of technology including talking on the telephone. The observational protocol will be based on the behavioural mapping techniques of Janssen et al.<sup>5</sup> Patients' solitary and interactive language activities will be recorded in 5-minute intervals and activity observed within the first minute of the observation interval will be recorded on a checklist of the predetermined behaviours. Semi-structured supported conversation interviews for stroke participants will be conducted within 5 days of the last observation. The interviews will explore patients' perceptions of environmental barriers and facilitators to language activities and communication and their experience of communication on the acute and rehabilitation wards.

#### IMPLEMENTATION:

A model of a CEE will be implemented within the acute and rehabilitation wards. The model will be developed as part of the research project. We hypothesise that our model of CEE will include the provision of:

- i) CEE equipment, for example reading materials such as books and magazines, access to a computer with internet and access to a communal dining area,
- ii) CEE education, support and training for staff, patients and their family, friends and significant others with the aim to develop the ability to support and facilitate 'language activity' and 'communication activity' for patients after stroke. This will be accessible via multiple modalities including one-on-one training and group training sessions, as

well as through the provision of video and written resources. A questionnaire will be administered pre and post training in order to determine staffs’ perceptions of changes in their knowledge, skills and attitude towards communication and aphasia. Additionally, feedback regarding the content and format of the training program will be obtained through questionnaires administered after the completion of the training program. Training and support provided in the implementation phase will be continued until the end of the intervention phase.

**POST-IMPLEMENTATION:**

Staff participant semi-structured interviews and focus groups will be conducted. Staff will participate in a one-hour semi-structured interview or a one-hour focus group to explore staff perceptions of environmental barriers and facilitators to language activities and communication.

The procedures for participant recruitment and data collection during the post-implementation phase will replicate those used in the baseline phase.

There is no travel commitment for all participants as all data collection and training will be conducted at the hospital.

| Observation interval | Observation time | Day 1: Sunday | Day 2: Monday | Day 3: Tuesday |
|----------------------|------------------|---------------|---------------|----------------|
| 1                    | 7am-8am          | PWA1          | PWA3          | PWA2           |
|                      | 8am-9am          | PWOA1         | PWOA3         | PWOA2          |
|                      | 9am-10am         |               |               |                |
|                      | 10am-11am        |               |               |                |
| 2                    | 11am-12pm        | PWA2          | PWA1          | PWOA           |
|                      | 12pm-1pm         | PWOA2         | PWOA1         | PWOA3          |
|                      | 1pm-2pm          |               |               |                |
|                      | 2pm-3pm          |               |               |                |
| 3                    | 3pm-4pm          | PWA3          | PWA2          | PWA1           |
|                      | 4pm-5pm          | PWOA3         | PWOA2         | PWOA1          |
|                      | 5pm-6pm          |               |               |                |
|                      | 6pm-7pm          |               |               |                |

Figure 1. CEE Observation schedule

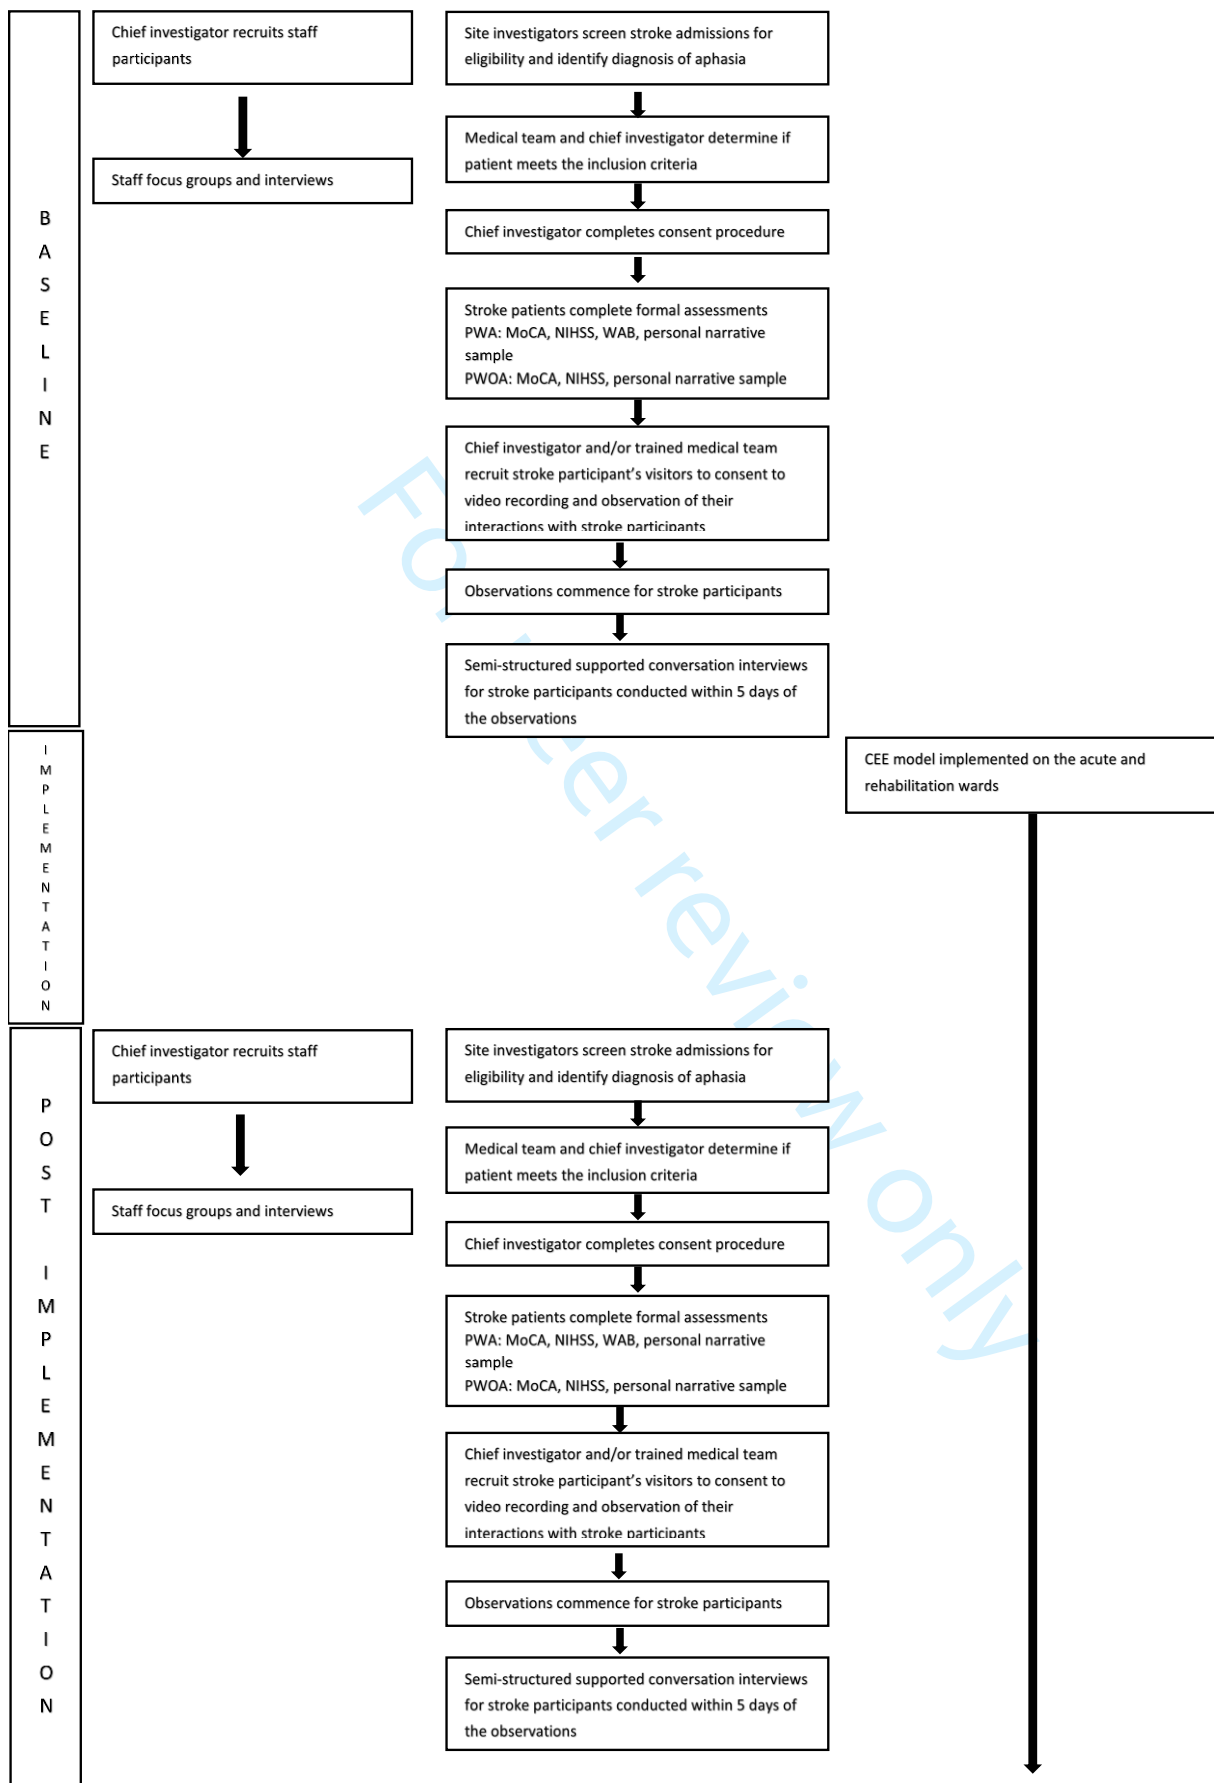

Figure 2. Study flow diagram

## References

1. Kertesz A. Western Aphasia Battery- Revised. San Antonio, TX, Harcourt Assessment; 2006.
2. Teasdale G, Jennett B. Assessment of coma and impaired consciousness. A practical scale. *Lancet*. 1974;2(7872): 81–4.
3. NIH stroke scale [Internet]. Bethesda, Md, National Institute of Neurological Disorders and Stroke (U.S.). 2011 [cited 2016 Feb 10]. Available from [https://www.ninds.nih.gov/sites/default/files/NIH\\_Stroke\\_Scale.pdf](https://www.ninds.nih.gov/sites/default/files/NIH_Stroke_Scale.pdf)
4. Nasreddine ZS, Phillips NA, Bédirian V, et al. The Montreal Cognitive Assessment, MoCA: A brief screening tool for mild cognitive impairment. *J Am Geriatr Soc*. 2005;53(4); 695-9.
5. Janssen H, Ada L, Bernhardt J, et al. An enriched environment increases activity in stroke patients undergoing rehabilitation in a mixed rehabilitation unit: A pilot non-randomized controlled trial. *Disabil Rehab*, 2014; 36(3), 255–262. doi: 10.3109/09638288.2013.788218



## Communication Enhanced Environments after Stroke consent procedure

### Version 1\_3-2-15

#### Stroke participants

The following consenting procedure will be used for all participants who are identified as potential research participants. Recruitment will only be completed by the Chief Investigator.

1. Check the stroke participant meets the inclusion criteria and exclusion criteria.
2. Read the participant information sheet to the participant. Use the pictures on the participant consent form to support the patient's comprehension of verbal information. Use gesture, written and pictorial support to facilitate verbal communication as required.
3. Provide the person responsible with the person responsible information sheet and consent form.
4. Provide time for the patient and the person responsible to discuss the study and ask questions to their satisfaction.
5. Ask the stroke participant if they consent to the study using simple closed questions (e.g. "Do you understand what the study is about?", "Do you have any questions about the study?", "Do you want to be in the study?", "Will you sign the form?"). Use multi-modal communication strategies and repeat information/questions as required. Use the pictures on the participant consent form to support patient comprehension of verbal information.
6. If the stroke patient agrees to participate in the study, ensure they sign the consent form witnessed by someone independent of the study.
7. Provide the stroke participant with a copy of the information sheet and consent form for their own records.
8. Add the participant study number to the consent form
9. Store the signed consent forms in a locked cabinet at the hospital site. This cabinet will only be accessible by the research investigators.

**Investigating Communication Enhanced Environments after stroke**

**Observation Protocol version 3\_ 23-2-16**

During the baseline and intervention period, patients’ behaviour will be observed and video recorded for a total of 12 hours. Patients who do not consent to video recording will be provided with the option of audio recording and manual observation. This will enable the collection of relevant notes about factors that might influence the interactions that may not be captured in the video or behavioural mapping, for example the context of the interactions or details about the environment.

Patients will be manually observed and video recorded for four hours per day on two weekdays and one weekend day between 7am to 7pm. The observations will be grouped into three x 4-hour observation intervals (e.g. 7am-11am, 11am-3pm, 3pm-7pm). Each day the patient will be observed and video recorded for one of the 4-hour observation intervals. The 4- hour observation period will be split into 5-minute intervals. All language and communication activity observed within the first minute of the 5-minute interval will be recorded on the behavioural mapping sheet with predetermined behaviours (Appendix 1). The free smart phone app ‘Impetus’ can be used to time 1-minute observations. You can set the timer to vibrate briefly when the 1-minute observation interval begins and ends.

Observation times (see Figure 1.) will be randomly selected by drawing out of an envelope. This will be conducted by the primary investigator prior to commencing patient observations. It may not be possible to observe the patient during the planned observation time, for example as a result of scheduled testing or home visits. If this occurs, patients can be observed during the next available observation interval. Changing or modifying the observation schedule should be avoided where possible.

| Observation interval | Observation time | Day 1: Sunday | Day 2: Monday | Day 3: Tuesday |
|----------------------|------------------|---------------|---------------|----------------|
| 1                    | 7am-8am          | *PWA1         | PWA3          | PWA2           |
|                      | 8am-9am          | **PWOA1       | PWOA3         | PWOA2          |
|                      | 9am-10am         |               |               |                |
|                      | 10am-11am        |               |               |                |
| 2                    | 11am-12pm        | PWA2          | PWA1          | PWA3           |
|                      | 12pm-1pm         | PWOA2         | PWOA1         | PWOA3          |
|                      | 1pm-2pm          |               |               |                |
|                      | 2pm-3pm          |               |               |                |
| 3                    | 3pm-4pm          | PWA3          | PWA2          | PWA1           |
|                      | 4pm-5pm          | PWOA3         | PWOA2         | PWOA1          |
|                      | 5pm-6pm          |               |               |                |
|                      | 6pm-7pm          |               |               |                |

Figure 1. Observation schedule

\*PWA: patient with aphasia

\*\*PWOA: patient without aphasia

## DISCOURSE SAMPLE

You must collect a personal narrative discourse sample for each participant at the beginning of the first observation. Once you have set up the video camera and have started recording, ask the patient “what has brought you into hospital?”. Once the patient has finished telling you their personal narrative, tell the patient you will now start the observations.

## VIDEO RECORDING SET-UP

Place the video camera facing the patient approximately 1-2 metres away from them. Ensure the camera is placed in an area where it is unlikely to be moved for the duration of the observation time (for example at the end of the patient’s bed). Ensure the camera frame is capturing the patient as well as their surroundings (e.g. potential communication partners, visitors, etc). If the patient relocates, reposition the camera to ensure the patient and their surroundings remain in frame. Observe and manually record the patient’s behaviour and their environment according to the procedure for behavioural mapping.

Do not record the patient in the bathroom or shower or during any other inappropriate circumstances (this may include sensitive conversations, culturally sensitive situations or if the patient requests). If the patient indicates that they don’t want to be recorded or becomes agitated, upset or distressed, use the ‘withdrawal from observations visual resource’ (if appropriate) and ask the patient:

1. Do they want you to stop video recording?
2. Do they want to be manually observed and audio recorded instead?  
If the patient responds ‘no’, ask the patient-
3. Can you come back another time to observe them?

If the patient asks you to stop recording you must cease recording immediately. The patient may allow you to continue with manual observations or come back another time to complete the observations. If the patient allows you to complete manual observations and audio recording, follow the audio-recording set-up and protocol below.

## AUDIO RECORDING SET-UP AND PROTOCOL

This protocol is to be followed if the patient or their family indicate they do not want to be video recorded however agree to audio recording and manual observations. Place the cap on the video camera and continue recording in order to capture audio. If using a battery-operated audio recorder, place it on a table close to the patient (within 1 metre). Ensure the audio recorder is placed in a location where it will not be touched or moved throughout the

1 observation time. Observe and manually record the patient's behaviour and their environment according to the  
2 procedure for behavioural mapping. Ensure spare batteries for the audio recorder are available if required.  
3  
4  
5

## 6 **COMMUNICATION PARTNERS AND VISITORS**

7  
8 Take note of all communication partners and visitors who have provided consent to video recording and/or  
9 observations of their patient interactions. If someone enters the room during recording politely interrupt the  
10 interaction, introduce yourself and inform the person that the patient is being video recorder recorded as a part of  
11 the study the patient has agreed to participate in. Ask the visitor if they would like to go out of the room with the  
12 researcher to find out about the study and the video recording. Provide a verbal explanation of the study and  
13 provide the 'Visitors/communication partners' information and consent form'. Offer the visitor the option of no  
14 video or manual recoding during their interaction with the patient. If the person chooses not to participate in  
15 manual or video observations inform the person that any incidental recordings of them will be deleted and will not  
16 be included in the study. The researcher will step out of the room for the duration of their visit.  
17  
18  
19  
20  
21  
22  
23  
24  
25

## 26 **PROCEDURE FOR BEHAVIOURAL MAPPING**

- 27 • Position self where the patient can be clearly observed
- 28 • Remain inconspicuous as possible
- 29 • Circle ALL appropriate components on the observation schedule in regards to location, activity, people  
30 present and details of language and communication observed within the first minute of each five-minute  
31 interval.
- 32 • You can circle more than one key per section if required (except for location).
- 33 • If you require a toilet break, leave the camera recording while you take a break. If you miss a 1-minute  
34 observation, place a line through the observation interval on the behavioural mapping sheet and write  
35 'unobserved-toilet break'.  
36  
37  
38  
39  
40  
41  
42  
43  
44  
45

## 46 **TIME**

- 47 • Write the time at the beginning of the 1-minute observation interval

## 48 **LOCATION**

- 49 • Circle only one location
- 50 • If the patient is moving between two locations, circle the location the patient is moving towards

51 AMENITIES: Toilet, shower.

52 BEDROOM: Around the patient's room or bed. If the patient is outside of their doorway this is considered 'hall'.  
53  
54  
55  
56  
57  
58  
59  
60

1 HALL: Any hallway within the hospital ward.

2 THERAPY AREA: In an allied health therapy session, including occupational therapy, physiotherapy, speech  
3 pathology, nursing.

4 FAMILY MEETING ROOM: Family meeting room.

5 DOCTOR'S ROOM: Doctor's office.

6 DINING ROOM: Dining room during meal times or any other time.

7 COMMUNAL AREA: Communal dining area.

8 OUTSIDE: Outside areas including the garden, car park.

9 OFF UNIT: Off-site locations, home visits, testing off site.

10 OTHER: Anything that doesn't fit into the above categories-provide description of location.

## 11 PEOPLE PRESENT

12 People present include any person that is near the patient and is able to have an interaction with the patient. If you  
13 do not know how to classify the person make a note to check with staff at a later time and complete the observation  
14 schedule.

15 **Exceptions:** People who are near the patient but are unable to interact with the patient, e.g. cognitive or behavioural  
16 issues, barriers between person and the patient preventing them from interacting- e.g. curtain drawn, people in the  
17 way. If an interaction is occurring despite objects in the way, the communication partner is considered as a 'person  
18 present'.

19 PEOPLE PRESENT: Nurse, nurse assistant, doctor, physio (physiotherapist), OT (occupational therapist), SP (speech  
20 pathologist), DT (dietician), SW (social worker), family/friend, other patient, alone (no-one present that is conducive  
21 to interactions), other (describe).

## 22 ACTIVITIES

23 UNOBSERVED: If you are unable to observe the patient. Place a line through the observation  
24 interval and write unobserved.

25 NO LANGUAGE ACTIVITY: If the patient is observed not engaged in any communication activity.

- 26 • Circle 'no activity' on the checklist
- 27 • Write what the patient is doing, e.g. 'sleeping'

28 INTERACTIVE LANGUAGE ACTIVITIES: Defined as an interaction involving an immediate communicative exchange  
29 with a communication partner. Interactive language activities may include talking, gesture and/or facial expression,  
30 reading, writing or drawing for the purpose of communication, use of communication aids or AAC devices and use of  
31 technology including talking on the telephone. Non-verbal gesture or facial expression includes eye contact to

1 initiate interactions, hand gestures (e.g. waving, thumbs up), body movements for the purpose of conveying a  
2 communicative message (e.g. shrugging) and/or facial expressions for the purpose of communication.

3 Communication aids or AAC devices includes any use of alternative and augmentative devices for the purpose of  
4 communication, e.g. high-tech or low-tech AAC devices such as letter boards, pictures/photos, whiteboard, writing  
5 or drawing, smart phones, iPad. Please describe communication aids observed.  
6  
7

8  
9 OTHER FUNCTIONAL COMMUNICATION ACTIVITIES: All other communication activities that do not involve a direct  
10 immediate communicative exchange with a communication partner. Functional communication activity may include  
11 reading, typing/writing, emailing, internet use, watching TV, listening to talking on the radio. Note the patient must  
12 be looking directly at the TV to be considered 'watching TV'. If the TV is on in the background, do not include this as  
13 'watching TV'.  
14  
15

16  
17 NON-FUNCTIONAL/NON-PROPOSITIONAL LANGUAGE ACTIVITIES: Singing, word games (carried out alone), language  
18 apps (used alone), copying written letters, words or sentences (carried out alone).  
19  
20

21 OTHER: Communication or language activities that do not fit the criteria of interactive language activity, 'other'  
22 functional communication activities, non-functional/non-propositional language activities or may be a confounding  
23 variable (for example, talking to self and talking to the observer). If a patient is talking to themselves, note if this is  
24 appropriate (for example, saying 'excuse me' after burping) or inappropriate (for example, an extensive monologue)  
25 and describe the context. If the patient's verbal output is inaudible, write this is in the space underneath 'talking to  
26 self'.  
27  
28  
29  
30  
31

32 **Note:** If the patient is using a computer, phone, smart device, or iPad where the activity they are engaged in (e.g.  
33 texting, emailing, playing a game, etc) cannot be accurately determined, note this in the comments section. After the  
34 1-minute observation interval has been completed ask the patient if they mind sharing if what activity they were  
35 completing on their device and record this in the relevant section. If the patient does not wish to share this  
36 information with you, record this in the 'other' section.  
37  
38  
39  
40

## 41 COMMENTS

42 Describe the context of the interactions or details about the environment in the comments section. This will provide  
43 information regarding factors that may influence the interactions, for example 'background noise'. Additionally,  
44 write down any information that may be missed in the video data, for example, people out of the camera frame,  
45 interactions that may be overheard in the room that might impact on the current interactions.  
46  
47  
48  
49

50 Draw a line under the final comment after the one-minute observation had been completed. Write any additional  
51 observations within the final 4 minutes below this line (see example).  
52  
53  
54  
55

56 If you have any queries or questions regarding this observation protocol or the observation protocol please contact  
57 chief investigator Sarah D'Souza.  
58  
59  
60

# Stroke participant information and consent form

## Communication activity in hospital

This research project is being undertaken as **part of the requirements** of a **PhD at Edith Cowan University**.

### Researchers' contact details

| <b>Edith Cowan University</b>                                                                   |                                        |                  |
|-------------------------------------------------------------------------------------------------|----------------------------------------|------------------|
| <b>Chief Investigator/</b><br>PhD student                                                       | <b>Sarah D'Souza</b>                   | Ph: 0439 982 451 |
| Principal Supervisor                                                                            | Professor Beth<br>Armstrong            | Ph: 08 6304 2769 |
| Co-Supervisor                                                                                   | Associate Professor<br>Natalie Ciccone | Ph: 08 6304 2047 |
| Co-Supervisor                                                                                   | Associate Professor<br>Erin Godecke    | Ph: 08 6304 5901 |
| Co-Supervisor                                                                                   | Associate Professor<br>Deborah Hersh   | Ph: 08 6304 2563 |
| <b>Hunter Stroke Service, University of Newcastle and Hunter<br/>Medical Research Institute</b> |                                        |                  |
| Adjunct Supervisor                                                                              | Dr Heidi Janssen                       | Ph: 02 40420417  |

1 You are **invited** to participate in a research project. Sarah D'Souza, a  
2 speech pathologist and PhD student is leading the study as Chief  
3 Investigator. This study has received ethical **approval** from **ECU** Human  
4 Research **Ethics Committee** and the Hollywood Private Hospital  
5 Research Ethics Committee.  
6  
7  
8  
9

10  
11  
12  
13  
14 This project is investigating the **hospital environment** to see how this  
15 **influences** patient **communication activity**. Communication activity  
16 involves communication, such as **talking** with other patients,  
17 **socialising**, **reading** the paper, using the **telephone**, talking to staff, or  
18 engaging in group activities including **therapy**.  
19  
20  
21  
22  
23  
24

25  
26  
27 **You** have been **selected** to participate as you have had a **stroke** and  
28 are receiving **treatment at Hollywood Private Hospital**. We are  
29 **interested** in seeing **how** the hospital **surroundings affect what you**  
30 **do** throughout the day.  
31  
32  
33  
34  
35

### 36 37 **What would you have to do?**

38  
39  
40 You will be **asked** to provide **consent** to **agree to participate** in the  
41 study.  
42  
43  
44

45 You will be **asked to consent** to:  
46  
47  
48  
49  
50

- 51 • Complete **three tests** to see how your stroke has affected **you**  
52 including your **language, concentration** and **memory**. These tests  
53 will be conducted at the **beginning of the project**. The tests will take  
54 approximately **1 hour** to complete with an option to complete the tests  
55  
56  
57  
58  
59  
60



1 over **two separate 30 minute sessions** and with as many **breaks** as  
2 you may need.  
3  
4  
5  
6

- 7
- 8 • A **researcher** spending approximately **1 hour discussing with you**  
9 your **opinion** regarding **how** your rehabilitation **surroundings affect**  
10 **your stay in hospital** and **your communication activity** levels.  
11  
12
  - 13 • A researcher **video recording, observing** and **writing down** what is  
14 happening in your **environment** including **your activities**. You will be  
15 observed and recorded for a total of **12 hours** over **3 days**.  
16  
17

18  
19  
20  
21  
22  
23  
24  
25  
26 You may **not want** to be **video recorded**. If you **request**, you will  
27 **not** be **video recorded**. You can ask not to be video recorded at **any**  
28 **time**. In this case the researcher will **only observe, audio record**  
29 and **write down** what is **happening in your** environment **including**  
30 your activities.  
31  
32  
33  
34  
35  
36  
37  
38  
39

- 40
- 41 • A researcher **looking at your hospital medical file** to collect  
42 **information** regarding:  
43
    - 44 • Your **details** (such as your age, your living arrangements, your  
45 occupation and your level of functioning before your stroke)
    - 46 • Any **conditions** or **diseases** you may have
    - 47 • Information about your **stroke** (for example when it happened, the  
48 **area** of the **brain** affected, how it has **affected your functioning**  
49 and **abilities**)
    - 50 • Details about **how long** you have **been in hospital** since your  
51 stroke  
52  
53  
54  
55  
56  
57  
58  
59  
60

1  
2  
3 If you decide to participate in this study, you **will not miss out** on any  
4 **treatment**. Participation will **not cost** you **anything** and **after**  
5  
6 completing the **tests** and the **interview** you will be asked to continue  
7  
8 participating in your **normal activities**.  
9  
10  
11  
12  
13  
14

15 We will **not record** if you are **behind closed curtains** or completing  
16  
17 sensitive tasks such as when you are in the **toilet** or **shower**.  
18  
19  
20  
21  
22

23 We may use the **recordings** of **you** to make a **training package**  
24  
25 (including a video). You can have **your face blurred out** if you want. If  
26  
27 you **do not want** to be in the training package we will **not include you**  
28  
29 in the training package or video.  
30  
31  
32  
33  
34

35 Your hospital **discharge** will **not be affected** because you are in this  
36  
37 study. **You** will be **discharged** from hospital when the hospital **medical**  
38  
39 **team decides** that you are **ready**.  
40  
41  
42  
43

44 There are **no known risks** of participating in this study. If you feel  
45  
46 uncomfortable at any time, you are free to **tell the researcher** and  
47  
48 **observations** within your room will **stop immediately**. You may  
49  
50 become **upset** during the **tests** or the **interview**. If this happens you  
51  
52 can **ask** to take a **break or stop** the interview.  
53  
54  
55  
56

57 There will be **no immediate benefit** to you from participating in this  
58  
59 research; however your participation will allow the collection of  
60

1 information that may **help improve** stroke **hospital wards** which may  
2 **benefit** future stroke survivors.  
3  
4  
5

6 **Participating** in this study is completely **voluntary**. You **do not have**  
7 **to** participate if you don't want to. If you decide to participate you may  
8 **withdraw** at **any time** without giving a reason and withdrawing **will not**  
9 **disadvantage** you in any way and will **not affect** your hospital  
10 **treatment**. If you **decide** that you do **not want to participate** in the  
11 study, you **can ask to remove** all of your **information** from the study.  
12  
13  
14  
15  
16  
17  
18  
19  
20  
21

22 All the **information** you give will be **confidential**. You will **not be**  
23 **identified** by name. You will be **assigned** a unique **code** and any  
24 information that may reveal your **identity** will be **removed**.  
25  
26  
27  
28

29 All personal health information will be accessed, used and stored in  
30 accordance with Commonwealth Privacy Laws. **Information** from all the  
31 people in the study is **combined** and **summarised**.  
32  
33  
34  
35  
36  
37  
38

39 We will **store** all your electronic **information** on a **password locked**  
40 **computer** and **password locked hard drive only accessible by the**  
41 **Chief Investigator**. Your hard copy information will be **kept** in a **locked**  
42 **cabinet** at Edith Cowan University. Your information will **only** be  
43 **accessible to researchers** named on **this study**.  
44  
45  
46  
47  
48  
49  
50  
51  
52

53 The **results** of this study may be **published** in research **journals** or  
54 presented at **conferences**. Your **name** will **not** be **used**.  
55  
56  
57  
58  
59  
60

1 **Data** may be **used** in higher degree by **research studies** in the **future**.  
2 **Confidentiality** will be **maintained** and no identifying information will  
3 be used.  
4  
5  
6  
7  
8  
9

10 **Data** will be **accessible by researchers** through data sharing archives.  
11 This data will be governed by an overarching body to ensure data is **only**  
12 **used for approved research** purposes. Researchers who access this  
13 data from the data bank will not have access to participant information  
14 and therefore **will not know your identity**.  
15  
16  
17  
18  
19  
20  
21  
22  
23

24 **Read** this information and be sure you **understand** its content **before**  
25 you **agree** to participate in this study.  
26  
27  
28  
29  
30  
31

32 If **you** would **like** to **participate** in this study, please **sign the form**  
33 below and **return** it to a **staff** member or a member of the **research**  
34 **team**.  
35  
36  
37  
38  
39  
40

### 41 **Questions or further information?**

42 You **may wish** to **discuss** this information with your **doctor, a relative**  
43 **or friend before agreeing** to take part in this study.  
44  
45  
46  
47  
48  
49

50 If you are interested in participating, please tell the researchers. If you  
51 have any questions or require any further information about the research  
52 project, please contact: Sarah D'Souza [Ph: 0439 982 451].  
53  
54  
55  
56  
57  
58  
59  
60

1 Thank you for considering the invitation to take part in this research  
2 project.  
3  
4  
5  
6

7 Yours sincerely,  
8  
9

10  
11  
12 Sarah D'Souza  
13  
14  
15  
16  
17

18 If you have any **concerns or complaints** about the research project and wish to **talk to an**  
19 **independent person**, you may contact:  
20  
21

22 **Kim Gifkins**  
23

24 **Senior Research Ethics Advisor**  
25

26 Edith Cowan University  
27

28 270 Joondalup Drive  
29

30 JOONDALUP WA 6027  
31

32 Phone: **(08) 6304 2170**  
33

34 Email: research.ethics@ecu.edu.au  
35  
36  
37  
38  
39  
40

41 This project has been approved by the ECU Human Research Ethics Committee and the  
42 Hollywood Private Hospital Research Ethics Committee.  
43  
44  
45  
46  
47  
48  
49  
50  
51  
52  
53  
54  
55  
56  
57  
58  
59  
60

1 **You** have been **asked to participate** in a **research** study.  
2  
3  
4  
5

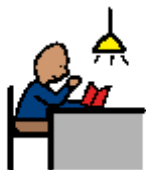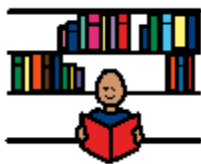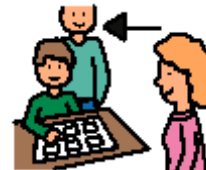

30 A researcher will **record you** with a **tape recorder** or a video **camera**,  
31 **watch** and **write down** what is happening in your **environment**  
32 including **your activities**.  
33  
34  
35  
36  
37  
38  
39  
40  
41  
42  
43  
44  
45  
46  
47  
48  
49  
50  
51  
52  
53  
54  
55  
56  
57  
58  
59  
60

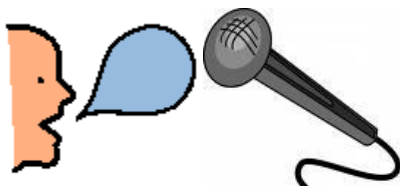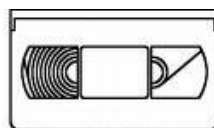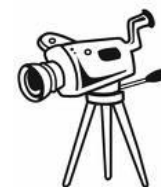

1 A **researcher** will **discuss** with you **your opinion** regarding **how** your  
2 hospital **surroundings** affect **your stay in hospital** and **your**  
3 **communication activity levels**.  
4  
5  
6  
7  
8  
9

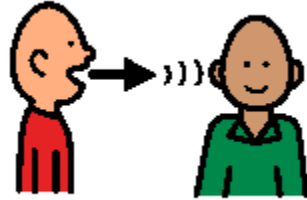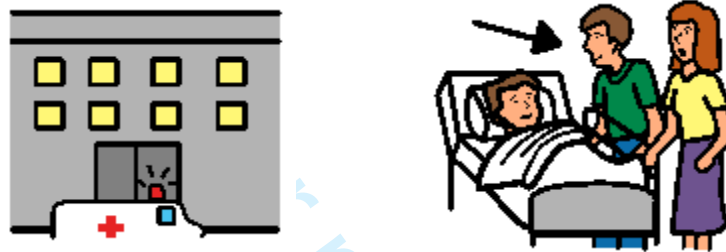

10  
11  
12  
13  
14  
15  
16  
17  
18  
19  
20  
21  
22  
23  
24  
25  
26  
27  
28  
29  
30  
31  
32  
33  
34  
35  
36  
37  
38  
39  
40 Your **name** and **personal details** will be kept **private**.  
41  
42  
43  
44  
45  
46  
47  
48  
49  
50  
51  
52  
53  
54  
55  
56  
57  
58  
59  
60

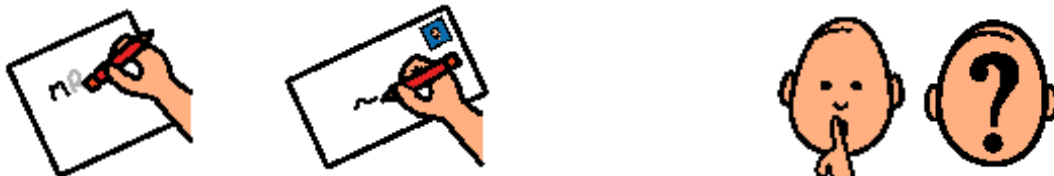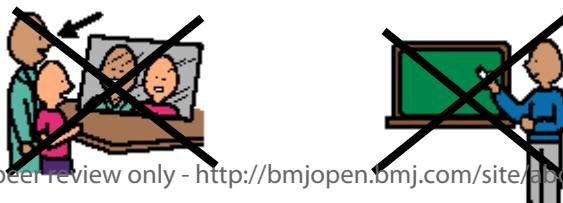

1  
2  
3 You can **say no at any time.**  
4  
5  
6  
7

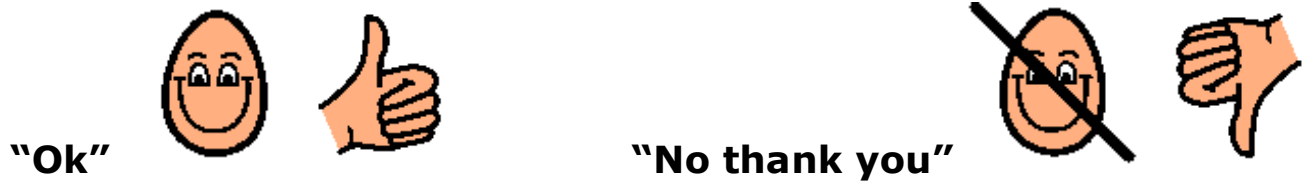

33 We may use the **recordings** of **you** to make a **training package**  
34 (including a video).  
35  
36  
37  
38  
39  
40  
41  
42  
43  
44  
45  
46  
47  
48  
49  
50  
51  
52  
53  
54  
55  
56  
57  
58  
59  
60

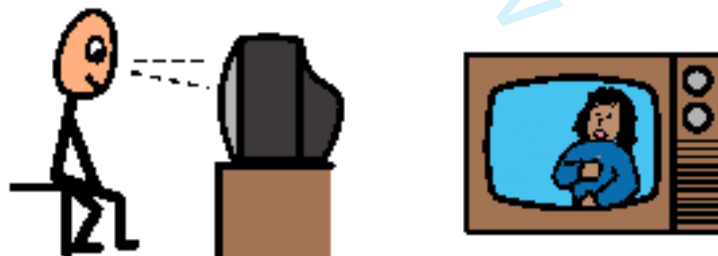



1 You can have **your face blurred out** if you want.  
2  
3  
4  
5

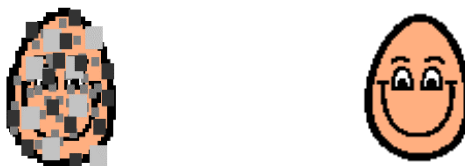

18 If you **do not want** to be in the training package we will **not include**  
19 **you** in the training package or video.  
20  
21

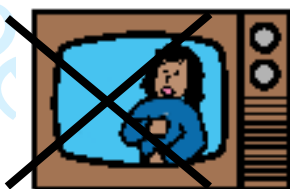

40 I **agree to take part** in the above research project and give my **consent**  
41 **freely**.  
42  
43  
44  
45  
46  
47  
48  
49  
50  
51  
52  
53  
54  
55  
56  
57  
58  
59  
60

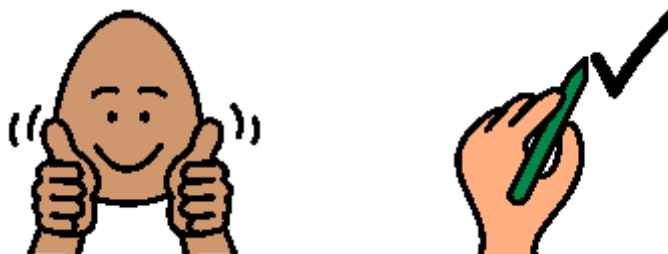

I have been **given a copy** of the **Information Statement** and I understand that the **project** will be **carried out** as **explained**.

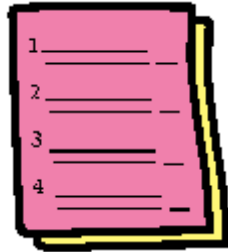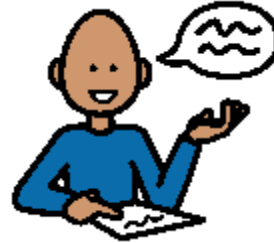

I understand and agree to:

- Complete **three tests** to assess how the stroke has affected **me**, my **language, concentration** and **memory**, at the **beginning of the project**.

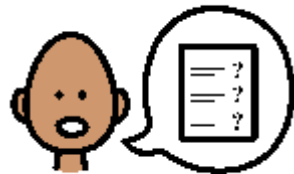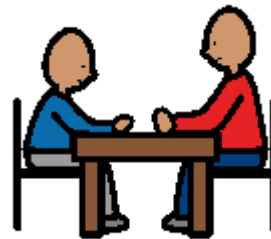

- A **researcher** spending approximately **1 hour discussing** with me my opinion regarding how my hospital **environment affects** my stay in hospital and **what I do**.

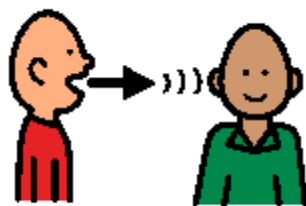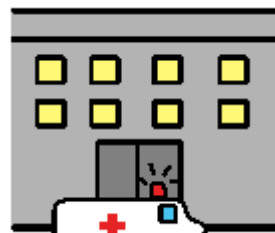

- 1  
2  
3  
4  
5  
6 • A researcher **video recording, observing** and **writing down** what is  
7 happening in my **environment** including **my activities**.  
8  
9  
10  
11  
12

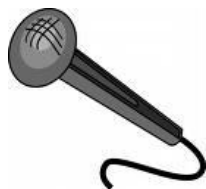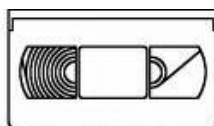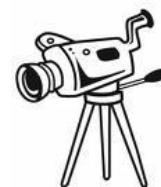

- 13  
14  
15  
16  
17  
18  
19  
20  
21  
22  
23  
24  
25  
26 • A researcher **looking at my hospital medical file** to collect  
27 **information** for the study.  
28  
29  
30

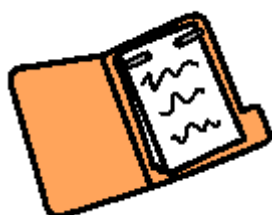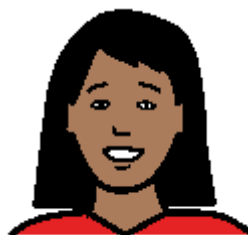

31  
32  
33  
34  
35  
36  
37  
38  
39  
40  
41  
42  
43 I **understand** that **my identity, personal information** and **data** will  
44 remain **confidential**.  
45  
46  
47  
48  
49  
50

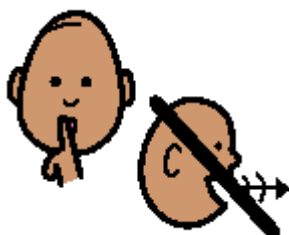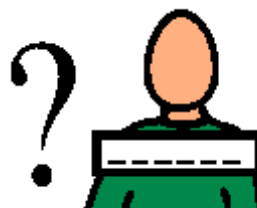

1  
2  
3 I have had the **opportunity** to **ask questions** about the study and am  
4  
5 **satisfied** with the **responses** that have been provided.  
6  
7  
8  
9  
10  
11

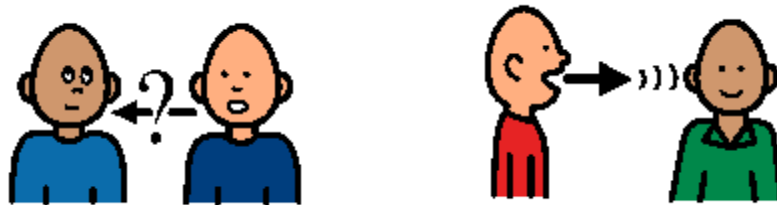

12  
13  
14  
15  
16  
17  
18  
19  
20  
21  
22  
23  
24  
25  
26  
27  
28  
29  
30  
31  
32  
33  
34  
35  
36  
37  
38  
39  
40  
41  
42  
43  
44  
45  
46  
47  
48  
49  
50  
51  
52  
53  
54  
55  
56  
57  
58  
59  
60

or peer review only

**Would you like to be involved?**

**Yes**

**No**

**I agree to the recordings of me to make a training package (including a video).**

**Yes**

**No**

**I would like my face blurred out.**

**Yes**

**No**

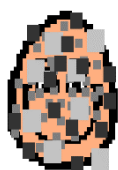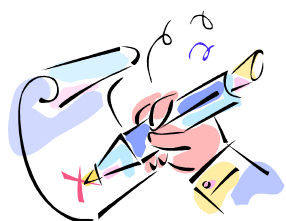

**Your Signature**

**Signature:** \_\_\_\_\_

**Print name:** \_\_\_\_\_

**Date:** \_\_\_\_\_

**Witness**

**Signature:** \_\_\_\_\_

**Print name:** \_\_\_\_\_

**Date:** \_\_\_\_\_

For peer review only

**Person responsible information sheet**  
**Stroke patients' communication activity in hospital**

This research project is being undertaken as part of the requirements of a PhD at Edith Cowan University.

Researchers' contact details

| Edith Cowan University                                                               |                                         |                  |
|--------------------------------------------------------------------------------------|-----------------------------------------|------------------|
| Chief Investigator/<br>PhD student                                                   | Sarah D'Souza                           | Ph: 0439 982 451 |
| Principal Supervisor                                                                 | Professor Beth Armstrong                | Ph: 08 6304 2769 |
| Co-Supervisor                                                                        | Associate Professor Natalie<br>Ciccione | Ph: 08 6304 2047 |
| Co-Supervisor                                                                        | Associate Professor Erin<br>Godecke     | Ph: 08 6304 5901 |
| Co-Supervisor                                                                        | Associate Professor Deborah<br>Hersh    | Ph: 08 6304 2563 |
| Hunter Stroke Service, University of Newcastle and Hunter Medical Research Institute |                                         |                  |
| Adjunct Supervisor                                                                   | Dr Heidi Janssen                        | Ph: 02 40420417  |

The participant is invited to take part in a research project. Sarah D'Souza, a Speech Pathologist and PhD student, is leading the study as Chief Investigator. This study has received ethical approval from ECU Human Research Ethics Committee and Hollywood Private Hospital Research Ethics Committee.

This project is investigating the hospital environment to see how this influences patient activity.

The participant has been selected to take part in this study as they have had a stroke and are receiving treatment at Hollywood Private Hospital. We are interested in

1 seeing how the hospital surroundings affect their communication activity throughout  
2 the day. Communication activity involves communication, such as talking with other  
3 patients, socialising, reading the paper, using the telephone, talking to staff, or  
4 engaging group activities including therapy.  
5  
6  
7  
8

9 This information sheet will explain the research project and will detail what is involved in the  
10 study. You will be given a copy of this information to keep for your reference.  
11  
12  
13  
14

15 Please read through all of the information carefully. You can ask the researcher questions  
16 about the study at any time.  
17  
18  
19  
20  
21

## 22 **Purpose of the research**

23  
24 Little is known about the impact of the hospital rehabilitation environment on patient  
25 communication activity levels during stroke recovery. This study will investigate how the  
26 hospital stroke ward environment influences patient communication activity levels. The  
27 information gathered from this study will assist in improving the Hollywood Private Hospital  
28 stroke ward environment to help the recovery of stroke survivors in the future.  
29  
30  
31  
32  
33  
34

## 35 **What does the stroke patient have to do?**

- 36  
37  
38  
39  
40
- 41 • Complete three tests and a recording of them talking to see how their stroke has  
42 affected their functioning including their language, concentration and memory. These  
43 tests will be conducted at the beginning of the project. The tests will take  
44 approximately 1 hour to complete with an option to complete the tests over two  
45 separate 30 minute sessions and with as many breaks as the participant needs.  
46  
47  
48  
49
  - 50 • Spend approximately 1 hour discussing with the researcher their opinion regarding how  
51 their rehabilitation surroundings affect their stay in hospital and activity levels.  
52  
53  
54  
55
  - 56 • Allow the researcher to video record, observe and write down what is happening in the  
57 participant's environment including their activities for a total of 12 hours over a 3 day  
58 period. Video recording is a useful way of capturing the details of everyday activities on  
59  
60

1 the ward. Often, people forget that the camera is there. Obviously, personal or private  
2 activity such as toileting would not be filmed. The participant may not want to be video  
3 recorded. If they request, they will not be video recorded. In this case the researcher  
4 will only observe, audio record and write down what is happening in their environment  
5 including their activities.  
6  
7  
8  
9

- 10
- 11 • A researcher will look at the participant's hospital medical file to collect information  
12 regarding:  
13
    - 14 • The participant's details (such as their age, living arrangements, occupation and  
15 level of functioning before stroke)
    - 16 • Any relevant conditions or diseases the participant may have
    - 17 • Information about the participant's stroke (for example when it happened, the  
18 area of the brain affected, how it has affected their functioning and abilities)
    - 19 • Details about how long the participant has been in hospital since their stroke
- 20  
21  
22  
23  
24  
25

26 The participant will not miss out on any treatment. Participation will not cost anything. After  
27 completing the tests and the interview the participant will be asked to continue their normal  
28 activities.  
29  
30  
31  
32  
33

34 The participant's hospital discharge will not be affected because they are in this study. The  
35 participant will be discharged from hospital when the hospital medical team decides that they  
36 are ready.  
37  
38  
39  
40  
41  
42

43 There are no known risks of participating in this study. If the participant feels uncomfortable  
44 at any time, you or the participant are free to tell the researcher and observations within  
45 their room will stop immediately. The participant may become upset during the tests or the  
46 interview. If this happens you or the participant can ask to take a break or stop the interview.  
47  
48  
49  
50  
51

52 There will be no immediate benefit to you or the participant from taking part in this research;  
53 however **their participation will allow the collection of information that may help**  
54 **improve stroke hospital wards which may benefit future stroke survivors.**  
55  
56  
57  
58  
59  
60



1 Participating in this study is completely voluntary. The participant can withdraw from taking  
2 part in the study at any time without giving a reason for withdrawing.  
3  
4  
5

6 The participant can request access to their research data at any time. They can request any  
7 of the information collected to be amended or removed if it is incorrect or they disagree with  
8 it. Please contact Sarah D'Souza (phone: 0439 982 451) if you would like to discuss  
9 accessing the participant's information.  
10  
11  
12  
13  
14  
15

16 The video, audio and written data will be identified by code. The information you provide will  
17 remain completely confidential. There will be no identifying information attached to the data  
18 and any information that may reveal the participant's identity will be removed. A list of  
19 participant names and codes will be kept in a locked filing cabinet at Hollywood Private  
20 Hospital and will only be accessible by the research team. All personal health information will  
21 be accessed, used and stored in accordance with Commonwealth Privacy Laws. The data will  
22 be stored on a password controlled computer or in a locked cabinet at Edith Cowan  
23 University. Electronic data will be backed-up on a password controlled hard drive only  
24 accessible by the Chief Investigator. Data will be stored for a maximum of 15 years after  
25 completion of the study. Video and audio recordings will then be permanently deleted and  
26 hard copy data will be shredded.  
27  
28  
29  
30  
31  
32  
33  
34  
35  
36  
37

38 Non-identifiable data will be accessible by researchers through data sharing archives. This  
39 data will be governed by an overarching body to ensure data is only used for approved  
40 research purposes. Researchers who access this data from the data bank will not have access  
41 to participant information therefore data will not be re-identifiable.  
42  
43  
44  
45  
46

47 The results of this study may be published in research journals or presented at conferences.  
48 The results will not include any information that may identify participants. Data may be used  
49 in higher degree by research studies in the future. In this circumstance, confidentiality will be  
50 maintained and no identifying information will be used.  
51  
52  
53  
54  
55  
56

57 Data collected from this study (including videos) may be used to develop training packages to  
58 improve future stroke survivors' communication activity levels in the future. We can blur out  
59  
60

1 the participant's face if they want. If they do not want to be in the training package we will  
2 not include them in the training package.  
3  
4  
5

6 At the end of the research project a summary of the results will be provided to you and the  
7 participant.  
8  
9

10  
11  
12  
13  
14  
15  
16  
17 If you have any questions or require any further information about the research project,  
18 please contact: Sarah D'Souza [Ph: 0439 982 451].  
19  
20  
21  
22  
23  
24  
25

26 Yours sincerely,  
27  
28  
29  
30  
31  
32

33 Sarah D'Souza  
34

35 If you have any concerns or complaints about the research project and wish to talk to an  
36 independent person, you may contact:  
37  
38

39 Kim Gifkins  
40

41 Senior Research Ethics Advisor  
42

43 Edith Cowan University  
44

45 270 Joondalup Drive  
46  
47

48 JOONDALUP WA 6027  
49

50 Phone: (08) 6304 2170  
51  
52

53 Email: [research.ethics@ecu.edu.au](mailto:research.ethics@ecu.edu.au)  
54  
55  
56  
57

58 This project has been approved by the ECU Human Research Ethics Committee and the  
59 Hollywood Private Hospital Research Ethics Committee.  
60

## Visitors and communication partners information and consent form

### Investigating Enhanced Environments after stroke

This research project is being undertaken as part of the requirements of a PhD at Edith Cowan University.

#### Researchers' contact details

| <b>Edith Cowan University</b>                                                               |                                     |                  |
|---------------------------------------------------------------------------------------------|-------------------------------------|------------------|
| Chief Investigator/<br>PhD student                                                          | Sarah D'Souza                       | Ph: 0439 982 451 |
| Principal Supervisor                                                                        | Professor Beth Armstrong            | Ph: 08 6304 2769 |
| Co-Supervisor                                                                               | Associate Professor Natalie Ciccone | Ph: 08 6304 2047 |
| Co-Supervisor                                                                               | Associate Professor Erin Godecke    | Ph: 08 6304 5901 |
| Co-Supervisor                                                                               | Associate Professor Deborah Hersh   | Ph: 08 6304 2563 |
| <b>Hunter Stroke Service, University of Newcastle and Hunter Medical Research Institute</b> |                                     |                  |
| Adjunct Supervisor                                                                          | Dr Heidi Janssen                    | Ph: 02 40420417  |

#### Description of the research project

This study is exploring stroke patient's experiences in regards to the environment of an in-patient stroke rehabilitation unit. We want to explore stroke patient communication activity, which includes activities such as talking with other patients and visitors, socialising, reading the paper, using the telephone, talking to staff, or engaging group activities including therapy.

The participant has agreed to take part in this study. They have agreed to be video recorded for a total of 12 hours over a three day period.

Your interactions with the patient will be video recorded and manually recorded by the chief investigator to explore patient communication activity levels. You can choose to be observed by the researcher only if you do not want to be video recorded. You do not need to do anything other than complete your usual tasks and activities. We will not record if you are having sensitive conversations with the participant, if they are behind closed curtains or completing sensitive tasks such as toileting or showering.

1 We may use the recordings of you to make a training package (including a video). You can have your face  
2 blurred if you want. If you do not want to be in the training package we will not include you in the training  
3 package.  
4

5  
6  
7  
8 There will be no cost to you associated with the investigation. Participation is completely voluntary. You do  
9 not have to participate if you don't want to. If you decide to participate you may withdraw at any time  
10 without giving a reason and withdrawing will not disadvantage you or the participant in any way.  
11  
12

13  
14  
15 You may also benefit from the knowledge that you are helping future stroke survivors. It is possible that you  
16 may not benefit from participating in this study. There are no known risks associated with participating in  
17 this study.  
18  
19

### 20 21 22 23 **Confidentiality of information**

24  
25 The video, audio and written data will be identified by code. There will be no identifying information  
26 attached to the data and any information that may reveal your identity will be removed. A list of participant  
27 names and codes will be kept in a locked filing cabinet at Hollywood Private Hospital and will only be  
28 accessible by the research team. All data will be accessed, used and stored in accordance with  
29 Commonwealth Privacy Laws. The data will be stored on a password controlled computer or in a locked  
30 cabinet at Edith Cowan University. Electronic data will be backed-up on password controlled hard drive only  
31 accessible by the Chief Investigator. Data will be stored for a maximum of 15 years after completion of the  
32 study. Video and audio recordings will then be permanently deleted and hard copy data will be shredded.  
33  
34  
35  
36  
37  
38

39  
40  
41 Non-identifiable data will be accessible by researchers through data sharing archives. This data will be  
42 governed by an overarching body to ensure data is only used for approved research purposes.

43  
44 Researchers who access this data from the data bank will not have access to participant information  
45 therefore data will not be re-identifiable.  
46  
47

48  
49  
50 The results of this study may be published in research journals or presented at conferences. The results  
51 will not include any information that may identify participants. Data may be used in higher degree by  
52 research studies in the future. In this circumstance, confidentiality will be maintained and no identifying  
53 information will be used.  
54  
55

56  
57  
58  
59 Please read this Information Statement and be sure you understand its content before you consent to take  
60 part.

1  
2 If you would like to take part, please complete the consent form and return it to Sarah D'Souza or a  
3 member of the research team.  
4  
5  
6  
7

8 ***Questions or further information?***

9 If you have any questions or require any further information about the research project, please contact:  
10 Sarah D'Souza [Ph: 0439 982 451]  
11  
12  
13  
14

15 Thank you for considering the invitation to take part in this research project.  
16  
17

18  
19 Yours sincerely,  
20  
21  
22

23  
24 Sarah D'Souza  
25  
26  
27

28 If you have any concerns or complaints about the research project and wish to talk to an independent  
29 person, you may contact: Kim Gifkins  
30  
31

32 Research Ethics Officer  
33  
34

35 Edith Cowan University  
36  
37

38 270 Joondalup Drive  
39  
40

41 JOONDALUP WA 6027  
42  
43

44 Phone: (08) 6304 2170  
45  
46

47 Email: [research.ethics@ecu.edu.au](mailto:research.ethics@ecu.edu.au)  
48  
49

50 This project has been approved by the ECU Human Research Ethics Committee and the Hollywood Private  
51 Hospital Research Ethics Committee.  
52  
53  
54  
55  
56  
57  
58  
59  
60

I \_\_\_\_\_ (print name), give my consent freely and agree to participate in observations of my interactions with the participant.

**Yes**      **No**      (please circle)

I agree to the researcher video recording my interactions with the participant

**Yes**      **No**      (please circle)

I agree to be included in a training package (including a video).

**Yes**      **No**      (please circle)

If I am included in the video training package I would like my face blurred out.

**Yes**      **No**      (please circle)

I understand the project will be conducted as stated in the information letter, a copy of which I have retained.

I understand I can withdraw from the project at any time and do not have to give a reason for withdrawing.

I understand personal information will remain confidential to the researchers.

I have been given the opportunity to raise any questions or concerns I have and am satisfied with the responses I was given.

### **Participant**

**Print name:** \_\_\_\_\_

**Signature:** \_\_\_\_\_

**Phone number:** \_\_\_\_\_

**Email address:** \_\_\_\_\_

**Date:** \_\_\_\_\_

### **Witness**

**Print name:** \_\_\_\_\_

**Signature:** \_\_\_\_\_

**Date:** \_\_\_\_\_

## Staff information and consent form

### Investigating Enriched Environments after stroke

This research project is being undertaken as part of the requirements of a PhD at Edith Cowan University.

#### Researchers' contact details

| Edith Cowan University                                                               |                                     |                  |
|--------------------------------------------------------------------------------------|-------------------------------------|------------------|
| Chief Investigator/<br>PhD student                                                   | Sarah D'Souza                       | Ph: 0439 982 451 |
| Principal Supervisor                                                                 | Professor Beth Armstrong            | Ph: 08 6304 2769 |
| Co-Supervisor                                                                        | Associate Professor Natalie Ciccone | Ph: 08 6304 2047 |
| Co-Supervisor                                                                        | Associate Professor Erin Godecke    | Ph: 08 6304 5901 |
| Co-Supervisor                                                                        | Associate Professor Deborah Hersh   | Ph: 08 6304 2563 |
| Hunter Stroke Service, University of Newcastle and Hunter Medical Research Institute |                                     |                  |
| Adjunct Supervisor                                                                   | Dr Heidi Janssen                    | Ph: 02 40420417  |

#### Description of the research project

This study is exploring staff and stroke patient's experiences in regards to the environment of the Edwards and Woods wards at Hollywood Private Hospital. We want to explore stroke patient communication activity, which includes activities such as talking with other patients, socialising, reading the paper, using the telephone, talking to staff, or engaging group activities including therapy. We would like to explore staffs' perceptions of barriers and facilitators to communication activity on the wards and address these in order to enhance the ward environment.

Staff have been selected to participate in order to gain a range of perspectives in regards to the day to day operations, procedures, policies and interactions that influence the environment of the Edwards and Woods wards. A training program for staff will be designed to address barriers and facilitators identified on the wards.

There are two components of this research study that involve staff. You may wish to consent to participate in one or both parts of this study.

1  
2 **Part 1:** Stroke in-patients will be video recorded for a total of 12 hours over a three day period. Your  
3 interactions with the patient will be video recorded and manually recorded by a member of the research  
4 team to explore patient communication activity levels. You can choose to be observed by the researcher  
5 only if you do not want to be video recorded. You do not need to do anything other than complete your  
6 usual daily tasks and activities. We will not record if you are behind closed curtains or completing sensitive  
7 tasks such as toileting or showering the patient.  
8  
9  
10  
11  
12  
13  
14

15 We may want use the recordings of you to make a training package (including a video). We will show you  
16 the video we want to use and explain exactly how this will be used before we do anything. You can have  
17 your face blurred out if you want. If you don't want to be included in the training package we will not include  
18 any videos of you in the training package.  
19  
20  
21  
22  
23

24 **Part 2:** You will be asked to take part in the following:  
25

- 26 • A focus group with the researcher and your co-workers for approximately 1 hour to explore your  
27 perceptions of environmental barriers and facilitators to activity.
- 28 • Attend a training program for approximately 1.5 hours. This will focus on training staff to promote  
29 patient communication on the ward. This session will be located at Hollywood Private Hospital and  
30 will be offered over several dates to facilitate your ability to attend. If you are unable to attend the  
31 training program we may provide training and video resources to facilitate your participation in  
32 training.
- 33 • Complete an anonymous short questionnaire before and after attending the training program to gain  
34 feedback on training and explore your perception of changes in your knowledge, skills and attitudes  
35 towards communication and aphasia.
- 36 • A final focus group with the researcher for approximately 1 hour to again explore your perceptions  
37 of environmental barriers and facilitators to activity.

38 The focus groups will be tape recorded however at any stage you may ask for the tape to stopped,  
39 edited or have your comments erased.  
40  
41  
42  
43  
44  
45  
46  
47  
48  
49  
50

51 There will be no cost to you associated with the investigation. Participation is completely voluntary. You do  
52 not have to participate if you don't want to. If you decide to participate you may withdraw at any time  
53 without giving a reason and withdrawing will not disadvantage you in any way.  
54  
55  
56  
57  
58

59 You may benefit from gaining knowledge and skills regarding communication from attending the training  
60 program. Additionally, you may also benefit from the knowledge that you are helping future stroke



1 survivors. It is possible that you may not benefit from participating in this study. There are no known risks  
2 associated with participating in this study.  
3  
4  
5

## 6 **Confidentiality of information** 7

8 The information you provide during the interviews will be audio recorded by the Chief Investigator. Your  
9 perspectives and opinions will be analysed and grouped into common 'themes' and 'stories'. This will be  
10 used to inform the development and review of the training program.  
11  
12  
13

14  
15  
16 The video, audio and written data will be identified by code. The information you provide will remain  
17 completely confidential. There will be no identifying information attached to the data and any information  
18 that may reveal your identity will be removed. A list of participant names and codes will be kept in a locked  
19 filing cabinet at Hollywood Private Hospital and will only be accessible by the research team. All data will be  
20 accessed, used and stored in accordance with Commonwealth Privacy Laws. The data will be stored on a  
21 password controlled computer or in a locked cabinet at Edith Cowan University. Electronic data will be  
22 backed-up on a password controlled hard drive only accessible by the Chief Investigator. Data will be  
23 stored for a maximum of 15 years after completion of the study. Video and audio recordings will then be  
24 permanently deleted and hard copy data will be shredded.  
25  
26  
27  
28  
29  
30  
31  
32

33 Non-identifiable data will be accessible by researchers through data sharing archives. This data will be  
34 governed by an overarching body to ensure data is only used for approved research purposes.  
35 Researchers who access this data from the data bank will not have access to participant information  
36 therefore data will not be re-identifiable.  
37  
38  
39  
40  
41  
42

43 The results of this study may be published in research journals or presented at conferences. The results  
44 will not include any information that may identify participants. Data may be used in higher degree by  
45 research studies in the future. In this circumstance, confidentiality will be maintained and no identifying  
46 information will be used.  
47  
48  
49  
50

51 A summary of the results will be provided through Hollywood Private Hospital 18 months after the  
52 completion of the study.  
53  
54  
55  
56

57 Please read this Information Statement and be sure you understand its content before you consent to take  
58 part.  
59  
60

1  
2 If you would like to take part, please complete the consent form and return it to Sarah D'Souza, Claire  
3 Tucak or a member of the research team.  
4  
5  
6  
7

8 **Questions or further information?**

9 You may wish to consult with your manager before agreeing to take part in this study.  
10  
11  
12  
13

14 If you have any questions or require any further information about the research project, please contact:  
15 Sarah D'Souza [Ph: 0439 982 451]  
16  
17  
18  
19

20 Thank you for considering the invitation to take part in this research project.  
21  
22  
23

24 Yours sincerely,  
25  
26  
27  
28  
29  
30

31 Sarah D'Souza  
32  
33  
34

35 If you have any concerns or complaints about the research project and wish to talk to an independent  
36 person, you may contact: Kim Gifkins  
37  
38

39 Research Ethics Officer  
40

41 Edith Cowan University  
42

43 270 Joondalup Drive  
44

45 JOONDALUP WA 6027  
46  
47

48 Phone: (08) 6304 2170  
49

50 Email: [research.ethics@ecu.edu.au](mailto:research.ethics@ecu.edu.au)  
51  
52  
53  
54

55 This project has been approved by the ECU Human Research Ethics Committee and the Hollywood Private  
56 Hospital Research Ethics Committee.  
57  
58  
59  
60

I \_\_\_\_\_ (print name), give my consent freely and agree to participate in (please circle):

**Part 1:**

Yes                      No                      **Observations** of your interactions with stroke patients.

Yes                      No                      **Video recording** of your interactions with stroke patients.

**Part 2:**

Yes                      No                      Complete two focus groups with the researcher, complete two short questionnaires and attend a training program.

I understand the project will be conducted as stated in the information letter, a copy of which I have retained.

I understand I can withdraw from the project at any time and do not have to give a reason for withdrawing.

I understand personal information will remain confidential to the researchers.

I have been given the opportunity to raise any questions or concerns I have and am satisfied with the responses I was given.

**Participant**

**Print name:** \_\_\_\_\_

**Signature:** \_\_\_\_\_

**Phone number:** \_\_\_\_\_

**Email address:** \_\_\_\_\_

**Date:** \_\_\_\_\_

**Witness**

**Print name:** \_\_\_\_\_

**Signature:** \_\_\_\_\_

**Date:** \_\_\_\_\_

**Volunteer information and consent form**  
**Investigating Enriched Environments after stroke**

This research project is being undertaken as part of the requirements of a PhD at Edith Cowan University.

**Researchers' contact details**

| <b>Edith Cowan University</b>                                                               |                                     |                  |
|---------------------------------------------------------------------------------------------|-------------------------------------|------------------|
| Chief Investigator/<br>PhD student                                                          | Sarah D'Souza                       | Ph: 0439 982 451 |
| Principal Supervisor                                                                        | Professor Beth Armstrong            | Ph: 08 6304 2769 |
| Co-Supervisor                                                                               | Associate Professor Natalie Ciccone | Ph: 08 6304 2047 |
| Co-Supervisor                                                                               | Associate Professor Erin Godecke    | Ph: 08 6304 5901 |
| Co-Supervisor                                                                               | Associate Professor Deborah Hersh   | Ph: 08 6304 2563 |
| <b>Hunter Stroke Service, University of Newcastle and Hunter Medical Research Institute</b> |                                     |                  |
| Adjunct Supervisor                                                                          | Dr Heidi Janssen                    | Ph: 02 40420417  |

**Description of the research project**

This study is a Communication Enhanced Environment (CEE) at Hollywood Private Hospital. A CEE involves several initiatives that aim to provide more opportunities for communication for stroke survivors on the ward. One of these initiatives involves the participation of volunteers.

**As a volunteer participant, you will be asked to take part in the following:**

- Attend a training program for approximately 1.5 hours. This will focus on training volunteers in communicating with stroke patients with communication difficulties. This session will be located at Hollywood Private Hospital and will be offered over several dates to facilitate your ability to attend. If you are unable to attend the training program we may provide training and video resources to facilitate your participation in training.
- Complete an anonymous short questionnaire before and after attending the training program to obtain your feedback on the training session.

- A focus group with the researcher and other volunteers for approximately 1 hour to explore your perceptions of communicating with stroke patients. The focus group will be tape recorded however at any stage you may ask for the tape to stopped, edited or have your comments erased.
- Host a communal dining and lounge area once a week to offer tea and coffee and provide social companionship for stroke patients.
- Your interactions with the patient may be video recorded and manually recorded by a member of the research team to explore patient communication activity levels. You can choose to be observed by the researcher only if you do not want to be video recorded. We will not record if you are having sensitive conversations with the stroke patient/s.

There will be no cost to you associated with participating in this study. Participation is completely voluntary. You do not have to participate if you don't want to. If you decide to participate you may withdraw at any time without giving a reason and withdrawing will not disadvantage you in any way.

You may benefit from gaining knowledge and skills regarding communication from attending the training program. Additionally, you may also benefit from the knowledge that you are helping future stroke survivors. It is possible that you may not benefit from participating in this study. There are no known risks associated with participating in this study.

### **Confidentiality of information**

The information you provide during the interviews will be audio recorded by the Chief Investigator. Your perspectives and opinions will be analysed and grouped into common 'themes' and 'stories'.

The video, audio and written data will be identified by code. The information you provide will remain completely confidential. There will be no identifying information attached to the data and any information that may reveal your identity will be removed. A list of participant names and codes will be kept in a locked filing cabinet at Hollywood Private Hospital and will only be accessible by the research team. All data will be accessed, used and stored in accordance with Commonwealth Privacy Laws. The data will be stored on a password controlled computer or in a locked cabinet at Edith Cowan University. Electronic data will be backed-up on a password controlled hard drive only accessible by the Chief Investigator. Data will be stored for a maximum of 15 years after completion of the study. Video and audio recordings will then be permanently deleted and hard copy data will be shredded.

Non-identifiable data will be accessible by researchers through data sharing archives. This data will be governed by an overarching body to ensure data is only used for approved research purposes.

1 Researchers who access this data from the data bank will not have access to participant information  
2 therefore data will not be re-identifiable.  
3  
4  
5

6 The results of this study may be published in research journals or presented at conferences. The results  
7 will not include any information that may identify participants. Data may be used in higher degree by  
8 research studies in the future. In this circumstance, confidentiality will be maintained and no identifying  
9 information will be used.  
10  
11  
12  
13  
14

15 A summary of the results will be provided through Hollywood Private Hospital 18 months after the  
16 completion of the study.  
17  
18  
19  
20

21 Please read this Information Statement and be sure you understand its content before you consent to take  
22 part.  
23  
24  
25  
26

27 If you would like to take part, please complete the consent form and return it to Sarah D'Souza, Claire  
28 Tucak or a member of the research team.  
29  
30  
31  
32

### 33 **Questions or further information?** 34 35 36

37 If you have any questions or require any further information about the research project, please contact:  
38 Sarah D'Souza [Ph: 0439 982 451]  
39  
40  
41  
42

43 Thank you for considering the invitation to take part in this research project.  
44  
45  
46

47 Yours sincerely,  
48  
49  
50  
51  
52  
53

54 Sarah D'Souza  
55  
56  
57

58 If you have any concerns or complaints about the research project and wish to talk to an independent  
59 person, you may contact: Kim Gifkins  
60

1 Research Ethics Officer

2 Edith Cowan University

3  
4 270 Joondalup Drive

5  
6 JOONDALUP WA 6027

7  
8  
9 Phone: (08) 6304 2170

10  
11 Email: research.ethics@ecu.edu.au

12  
13  
14  
15  
16 This project has been approved by the ECU Human Research Ethics Committee and the Hollywood Private  
17 Hospital Research Ethics Committee.  
18  
19  
20  
21  
22  
23  
24  
25  
26  
27  
28  
29  
30  
31  
32  
33  
34  
35  
36  
37  
38  
39  
40  
41  
42  
43  
44  
45  
46  
47  
48  
49  
50  
51  
52  
53  
54  
55  
56  
57  
58  
59  
60

For peer review only

1 I \_\_\_\_\_ (print name), give my consent freely and  
2 agree to participate in (please circle) this study as described in this information and consent form.  
3  
4

5 I understand the project will be conducted as stated in the information letter, a copy of which I have  
6 retained.  
7  
8

9 I understand I can withdraw from the project at any time and do not have to give a reason for withdrawing.  
10  
11

12 I understand personal information will remain confidential to the researchers.  
13  
14

15 I have been given the opportunity to raise any questions or concerns I have and am satisfied with the  
16 responses I was given.  
17  
18  
19

20  
21 **Participant**

22 **Print name:** \_\_\_\_\_  
23

24 **Signature:** \_\_\_\_\_  
25

26 **Phone number:** \_\_\_\_\_  
27

28 **Email address:** \_\_\_\_\_  
29

30 **Date:** \_\_\_\_\_  
31

32 **Witness**

33 **Print name:** \_\_\_\_\_  
34

35 **Signature:** \_\_\_\_\_  
36

37 **Date:** \_\_\_\_\_  
38  
39  
40  
41  
42  
43  
44  
45  
46  
47  
48  
49  
50  
51  
52  
53  
54  
55  
56  
57  
58  
59  
60



# BMJ Open

## Hospital staff's, volunteers', and patients' perceptions of barriers and facilitators to communication following stroke in an acute and rehabilitation private hospital ward: A qualitative description study.

|                                 |                                                                                                                                                                                                                                                                                                                                                                                                                                                                                                                                                                                                                                                                       |
|---------------------------------|-----------------------------------------------------------------------------------------------------------------------------------------------------------------------------------------------------------------------------------------------------------------------------------------------------------------------------------------------------------------------------------------------------------------------------------------------------------------------------------------------------------------------------------------------------------------------------------------------------------------------------------------------------------------------|
| Journal:                        | <i>BMJ Open</i>                                                                                                                                                                                                                                                                                                                                                                                                                                                                                                                                                                                                                                                       |
| Manuscript ID                   | bmjopen-2020-043897.R2                                                                                                                                                                                                                                                                                                                                                                                                                                                                                                                                                                                                                                                |
| Article Type:                   | Original research                                                                                                                                                                                                                                                                                                                                                                                                                                                                                                                                                                                                                                                     |
| Date Submitted by the Author:   | 02-Mar-2021                                                                                                                                                                                                                                                                                                                                                                                                                                                                                                                                                                                                                                                           |
| Complete List of Authors:       | D'Souza, Sarah; Edith Cowan University, School of Medical and Health Sciences; La Trobe University, Centre for Aphasia Recovery and Rehabilitation Research<br>Godecke, Erin; Edith Cowan University, School of Medical and Health Sciences; La Trobe University, Centre for Aphasia Recovery and Rehabilitation Research<br>Ciccone, Natalie; Edith Cowan University, School of Medical and Health Sciences<br>Hersh, Deborah; Edith Cowan University, School of Medical and Health Sciences<br>Janssen, Heidi; The University of Newcastle Hunter Medical Research Institute<br>Armstrong, Elizabeth; Edith Cowan University, School of Medical and Health Sciences |
| <b>Primary Subject Heading</b>: | Neurology                                                                                                                                                                                                                                                                                                                                                                                                                                                                                                                                                                                                                                                             |
| Secondary Subject Heading:      | Qualitative research, Rehabilitation medicine                                                                                                                                                                                                                                                                                                                                                                                                                                                                                                                                                                                                                         |
| Keywords:                       | Stroke < NEUROLOGY, Adult neurology < NEUROLOGY, QUALITATIVE RESEARCH                                                                                                                                                                                                                                                                                                                                                                                                                                                                                                                                                                                                 |
|                                 |                                                                                                                                                                                                                                                                                                                                                                                                                                                                                                                                                                                                                                                                       |

SCHOLARONE™  
Manuscripts



I, the Submitting Author has the right to grant and does grant on behalf of all authors of the Work (as defined in the below author licence), an exclusive licence and/or a non-exclusive licence for contributions from authors who are: i) UK Crown employees; ii) where BMJ has agreed a CC-BY licence shall apply, and/or iii) in accordance with the terms applicable for US Federal Government officers or employees acting as part of their official duties; on a worldwide, perpetual, irrevocable, royalty-free basis to BMJ Publishing Group Ltd ("BMJ") its licensees and where the relevant Journal is co-owned by BMJ to the co-owners of the Journal, to publish the Work in this journal and any other BMJ products and to exploit all rights, as set out in our [licence](#).

The Submitting Author accepts and understands that any supply made under these terms is made by BMJ to the Submitting Author unless you are acting as an employee on behalf of your employer or a postgraduate student of an affiliated institution which is paying any applicable article publishing charge ("APC") for Open Access articles. Where the Submitting Author wishes to make the Work available on an Open Access basis (and intends to pay the relevant APC), the terms of reuse of such Open Access shall be governed by a Creative Commons licence – details of these licences and which [Creative Commons](#) licence will apply to this Work are set out in our licence referred to above.

Other than as permitted in any relevant BMJ Author's Self Archiving Policies, I confirm this Work has not been accepted for publication elsewhere, is not being considered for publication elsewhere and does not duplicate material already published. I confirm all authors consent to publication of this Work and authorise the granting of this licence.

## Title page

### Title

Hospital staff's, volunteers', and patients' perceptions of barriers and facilitators to communication following stroke in an acute and rehabilitation private hospital ward: A qualitative description study.

### Authors

Sarah D'Souza<sup>1,2</sup>, Erin Godecke<sup>1,2</sup>, Natalie Ciccone<sup>1</sup>, Deborah Hersh<sup>1</sup>, Heidi Janssen<sup>3</sup>, Elizabeth Armstrong<sup>1</sup>

### Affiliations

1. Edith Cowan University, Perth, Western Australia, Australia
2. La Trobe University, Centre for Aphasia Recovery and Rehabilitation Research  
Melbourne, Victoria, Australia
3. Hunter New England Local Health District, NSW Health, New South Wales, Australia

### Addresses of all authors

Sarah D'Souza

School of Medical and Health Sciences, Edith Cowan University  
270 Joondalup Drive, Joondalup 6027, Australia  
s.dsouza@ecu.edu.au

Associate Professor Erin Godecke

School of Medical and Health Sciences, Edith Cowan University  
270 Joondalup Drive, Joondalup, WA 6027, Australia.  
e.godecke@ecu.edu.au

Associate Professor Natalie Ciccone

School of Medical and Health Sciences, Edith Cowan University

1  
2  
3 270 Joondalup Drive, Joondalup 6027, Australia

4  
5  
6 n.ciccione@ecu.edu.au

7  
8 Associate Professor Deborah Hersh

9  
10 School of Medical and Health Sciences, Edith Cowan University

11  
12  
13 270 Joondalup Drive, Joondalup, WA 6027, Australia

14  
15  
16 d.hersh@ecu.edu.au

17  
18 Dr Heidi Janssen

19  
20 Hunter Medical Research Institute

21  
22  
23 Lot 1, Kookaburra Circuit, New Lambton Heights NSW 2305

24  
25  
26 Heidi.Janssen@health.nsw.gov.au

27  
28 Professor Elizabeth Armstrong

29  
30 School of Medical and Health Sciences, Edith Cowan University

31  
32  
33 270 Joondalup Drive, Joondalup, WA 6027, Australia

34  
35  
36 b.armstrong@ecu.edu.au

37  
38  
39  
40 **Key words:** stroke, adult neurology, qualitative research

41  
42  
43 **Reporting guidelines checklist:** The consolidated criteria for reporting qualitative studies  
44 (COREQ)<sup>9</sup> was used to guide reporting this study.

45  
46  
47 **Corresponding author:** Sarah D'Souza is the corresponding author, s.dsouza@ecu.edu.au

48  
49  
50  
51 The Corresponding Author has the right to grant on behalf of all authors and does grant on  
52 behalf of all authors, an exclusive licence (or non-exclusive for government employees) on a  
53 worldwide basis to the BMJ Publishing Group Ltd to permit this article (if accepted) to be  
54 published in BMJ editions and any other BMJ PGL products and sublicences such use and  
55 exploit all subsidiary rights, as set out in our licence.  
56  
57  
58  
59  
60

1  
2  
3  
4  
5  
6 All authors have completed the [Unified Competing Interest form](#)) and declare: This research  
7 was funded by The Hollywood Private Hospital Research Grant (RF087). SD received an  
8 Australian Post Graduate Award Scholarship for the first year of this study and received an  
9 ECU Research Travel Grant. No other support from any organisation for the submitted work;  
10  
11 no financial relationships with any organisations that might have an interest in the  
12 submitted work in the previous three years, no other relationships or activities that could  
13 appear to have influenced the submitted work.  
14  
15  
16  
17  
18  
19  
20

21 The lead author (the manuscript's guarantor) affirms that the manuscript is an honest,  
22 accurate, and transparent account of the study being reported; that no important aspects of  
23 the study have been omitted; and that any discrepancies from the study as planned have  
24 been explained.  
25  
26  
27  
28  
29  
30

31 This study has Ethics approval from the Edith Cowan University Human Research Ethics  
32 Committee (ECU HREC 12149) and The Hollywood Private Hospital Research Ethics  
33 Committee (HPH431).  
34  
35  
36  
37  
38  
39  
40  
41  
42  
43  
44  
45  
46  
47  
48  
49  
50  
51  
52  
53  
54  
55  
56  
57  
58  
59  
60

## Abstract

**Objectives:** To explore barriers and facilitators to patient communication in an acute and rehabilitation ward setting from the perspectives of hospital staff, volunteers and patients following stroke.

**Design:** A qualitative descriptive study as part of a larger study which aimed to develop and test a Communication Enhanced Environment in an acute and a rehabilitation ward.

**Setting:** A metropolitan Australian private hospital.

**Participants:** Focus groups with acute and rehabilitation doctors, nurses, allied health staff and volunteers (n=51) and interviews with patients following stroke (n=7), including three with aphasia, were conducted.

**Results:** The key themes related to barriers and facilitators to communication, contained sub-categories related to hospital, staff and patient factors. Hospital related barriers to communication were private rooms, mixed wards, the physical hospital environment, hospital policies, the power imbalance between staff and patients, and task specific communication. Staff related barriers to communication were staff's perception of time pressures, underutilisation of available resources, staff individual factors such as personality, role perception and lack of knowledge and skills regarding communication strategies. The patient related barrier to communication involved patients' functional and medical status. Hospital related facilitators to communication were shared rooms/co-location of patients, visitors and volunteers. Staff related facilitators to communication were utilisation of resources, speech pathology support, staff knowledge and utilisation of communication strategies and individual staff factors such as personality. No patient related facilitators to communication were reported by staff, volunteers or patients.

**Conclusions:** Barriers and facilitators to communication appeared to be interconnected and likely to influence one another suggests communication access may vary between patients within the same setting. Practical changes may promote communication opportunities for patients in hospital early after stroke such as access to areas for patient co-location as well as areas for privacy, encouraging visitors, enhancing patient autonomy, and providing communication trained health staff and volunteers.

### Study strengths

- This study involved a large number of staff in comparison to previous studies and included volunteers as well patients after stroke with and without aphasia.
- Data saturation was reached within the staff focus groups.

### Study limitations

- The results in this study reflect the perceptions of a small number of medical (n=2) and nursing staff (n= 11) compared to allied health staff (N= 32).
- This study involved exploring the perceptions a small number of patients; a broader range of perspectives may have been expressed with a larger number of participants.
- This study was conducted at a private hospital involving a mixed acute and a mixed rehabilitation ward therefore these results reflect this context.

## Background

Aphasia research supports the theory that commencing aphasia rehabilitation in the early phase post-stroke (<1-month post-stroke) results in better outcomes than therapy commenced in the chronic phase (>6-months post stroke).<sup>1,2</sup> However, patients in hospital following stroke spend on average 50-94% of their day inactive.<sup>3,4</sup> Despite improvements in functional independence during their hospital admission following stroke, patients' engagement in cognitive and social activity remains largely unchanged.<sup>5</sup> Patients with aphasia spend two thirds less time engaged in social interactions with family and friends compared to those without aphasia.<sup>6</sup> A lack of social and cognitive activity early after stroke for patients with aphasia has the potential to contribute to: i) the development of maladaptive compensatory communication behaviours, and ii) the learned non-use of language, which may ultimately impact on their quality of life and overall language recovery.<sup>6</sup>

Patients following stroke with and without aphasia have described time outside therapy as "dead" and "wasted", reporting a lack of stimulation and inactivity in hospital impacting their ability to self-direct their rehabilitation outside of therapy.<sup>7</sup> They report the experience of boredom is worse in the evenings and weekends when there are less structured activities.<sup>8</sup> They also perceive that boredom negatively influences their mood, motivation, and contributes to their experience of post-stroke fatigue.<sup>8</sup> Boredom is associated with a loss of autonomy and sense of control and contributes to patients becoming passive recipients of care, which may have negative implications for stroke recovery.<sup>8</sup>

This study aimed to explore hospital staff and volunteer, and patient perceptions of barriers and facilitators to patient communication in an acute and a rehabilitation hospital ward. Identifying barriers and facilitators to patients' communication will inform the development of a Communication Enhanced Environment (CEE) for the purposes of increasing their engagement in language activity within a hospital ward to maximise post-stroke aphasia language recovery.

## Methods

### Design

This was a sub-study of a larger study which aimed to develop and test a CEE model within an acute and a rehabilitation ward (see supplementary file for study protocol and



1  
2  
3 procedure). This sub-study contributed to the baseline phase of the larger study outlined  
4 below:  
5

- 6  
7 *i) Baseline phase:* observe and quantify levels of engagement in language activity in the  
8 acute and rehabilitation ward environment for patients following stroke, and explore  
9 hospital staff, volunteers, and patients' perceptions of barriers and facilitators to  
10 communication in hospital;  
11  
12 *ii) Implementation phase:* develop and implement the CEE model on the acute and  
13 rehabilitation wards;  
14  
15 *iii) Post-implementation phase:* assess the impact of the CEE model on patient  
16 engagement in language activity, and hospital staff, volunteers and patients'  
17 perceptions of barriers to communication in hospital.  
18  
19  
20  
21  
22  
23

24 This study has Ethics approval from the Edith Cowan University Human Research  
25 Ethics Committee (ECU HREC 12149) and The Hollywood Private Hospital Research Ethics  
26 Committee (HPH431).  
27  
28

### 29 **Reporting guidelines**

30  
31 The consolidated criteria for reporting qualitative studies (COREQ)<sup>9</sup> was used to  
32 guide reporting this study (Appendix A.).  
33  
34

### 35 **Research authors' relationship with participants**

36  
37 The first author who was external to the hospital conducted focus groups and  
38 interviews. The first author engaged key hospital team members for the duration of the  
39 study to inform the study design to ensure it aligned with the hospital policies and priorities.  
40  
41  
42

### 43 **Patient and public involvement**

44  
45 Patients and the public were not involved in the design of this study however this  
46 data informed the development of the CEE model in the larger study. A working group  
47 consisting of key members of the stroke multidisciplinary team provided feedback on this  
48 study's findings and were involved in the development of the CEE model and embedding  
49 approach, which was based on the outcomes of this sub-study.  
50  
51  
52

### 53 **Setting**

54  
55 This study was conducted on an acute and a rehabilitation ward at a private hospital  
56 in Perth, Western Australia. The acute ward was a 26- bed unit with patients following acute  
57 stroke as well as other medical conditions. The acute ward had four individual rooms and  
58  
59  
60

nine shared rooms, two rooms with four beds per room, and seven rooms with two beds per room. Patients ate meals in their rooms and had access to an outdoor balcony area. The rehabilitation ward was a 44-bed mixed rehabilitation unit for patients following stroke and other medical, orthopaedic and post-surgical conditions. There were thirty-six individual rooms, and four shared rooms with two beds in each room. Patients had breakfast in their rooms but were encouraged to eat lunch and dinner in one of two communal dining areas.

### Participants

*Hospital staff participants:* Purposeful sampling of acute and rehabilitation hospital staff was conducted to include at least one representative from each acute and rehabilitation staff group including medical, nursing, volunteers, and allied health staff members who were over 18 years of age. Formal consent to participate in the study was completed by the first author (see supplementary file for consent forms and procedures). A total of 51 staff and volunteers were recruited (Table 1.) by contacting staff department managers who identified staff currently working or had previously worked with patients following stroke on the acute or rehabilitation wards.

Table 1. Staff participants

| Staff/volunteer groups       |   |                                       |   |                |   |
|------------------------------|---|---------------------------------------|---|----------------|---|
| Medical & Nursing            | N | Allied Health                         | N | Volunteer      | N |
| Acute nurses (AN)            | 2 | Dietitian (DT)                        | 1 | Volunteers (V) | 6 |
| Clinical nurse manager (CNM) | 1 | Occupational therapy manager (OTM)    | 1 |                |   |
| Medical consultants (MC)     | 2 | Occupational therapists (OT)          | 5 |                |   |
| Rehabilitation nurses (RN)   | 8 | Occupational therapy assistants (OTA) | 3 |                |   |
|                              |   | Physiotherapists (PT)                 | 8 |                |   |

|    |                     |   |
|----|---------------------|---|
| 1  |                     |   |
| 2  |                     |   |
| 3  |                     |   |
| 4  | Physiotherapy       | 2 |
| 5  | assistants (PTA)    |   |
| 6  |                     |   |
| 7  |                     |   |
| 8  | Social workers (SW) | 5 |
| 9  |                     |   |
| 10 |                     |   |
| 11 | Speech pathology    | 1 |
| 12 | manager (SPM)       |   |
| 13 |                     |   |
| 14 |                     |   |
| 15 |                     |   |
| 16 | Speech pathologists | 4 |
| 17 | (SP)                |   |
| 18 |                     |   |
| 19 |                     |   |
| 20 | Speech pathology    | 1 |
| 21 | assistant (SPA)     |   |
| 22 |                     |   |
| 23 |                     |   |
| 24 |                     |   |
| 25 | Volunteer manager   | 1 |
| 26 | (VM)                |   |
| 27 |                     |   |
| 28 |                     |   |
| 29 |                     |   |
| 30 |                     |   |
| 31 |                     |   |
| 32 |                     |   |
| 33 |                     |   |
| 34 |                     |   |
| 35 |                     |   |
| 36 |                     |   |
| 37 |                     |   |
| 38 |                     |   |
| 39 |                     |   |
| 40 |                     |   |
| 41 |                     |   |
| 42 |                     |   |
| 43 |                     |   |
| 44 |                     |   |
| 45 |                     |   |
| 46 |                     |   |
| 47 |                     |   |
| 48 |                     |   |
| 49 |                     |   |
| 50 |                     |   |
| 51 |                     |   |
| 52 |                     |   |
| 53 |                     |   |
| 54 |                     |   |
| 55 |                     |   |
| 56 |                     |   |
| 57 |                     |   |
| 58 |                     |   |
| 59 |                     |   |
| 60 |                     |   |

---

1  
2  
3  
4  
5  
6  
7  
8  
9  
10  
11  
12  
13  
14  
15  
16  
17  
18  
19  
20  
21  
22  
23  
24  
25  
26  
27  
28  
29  
30  
31  
32  
33  
34  
35  
36  
37  
38  
39  
40  
41  
42  
43  
44  
45  
46  
47  
48  
49  
50  
51  
52  
53  
54  
55  
56  
57  
58  
59  
60

*Patient participants:* All patients consecutively admitted following stroke from January to February 2016, and June 2016 to July 2017 were screened for eligibility by the hospital site champions to participate in the study. Inclusion criteria: i) admitted to the acute or rehabilitation ward with an acute stroke, ii) less than 21 days post-stroke during data collection, iii) able to provide informed consent based on the judgement of the medical team responsible for the medical management of the patient, iv) Glasgow Coma Scale<sup>10</sup> greater than 10, v) estimated total length of hospital stay greater than 14 days, vi) adequate English proficiency to participate in interviews as determined by managing speech pathologist or medical team. Exclusion criteria: i) uncorrected hearing or vision (for example hearing impairment without the use of hearing aids or vision impairment without the use of glasses), ii) medically unstable, iii) documented diagnosis of current untreated depression, documented diagnosis of dementia, previous aphasia or traumatic brain injury. The diagnosis of aphasia was confirmed for those who achieved a Western Aphasia Battery-Revised<sup>11</sup> Aphasia Quotient score less than 93.7. Eligible patients were approached by the site investigators for consent to be approached by the research team. The first author completed formal consent with all patient participants (see supplementary file for consent forms and procedures). A total of 9 patients were recruited, however 2 patients were withdrawn as they became medically unwell. Data collection was completed for 4 patients without aphasia and 3 patients with aphasia. See Figure 1. for the summary of patient screening and recruitment. Patient details and demographics are detailed in Table 2.

No staff or patients withdrew from participating in this study.

### **Data collection**

The first author, a female speech pathologist (Bachelor of Speech Pathology, Honours) and PhD student with seven years clinical experience working in the hospital setting and five years research experience, including conducting interviews and focus groups, completed all semi-structured interviews and focus groups. Staff were informed that the researchers wanted to investigate their perceptions of the hospital ward environment in regards to communication opportunities to inform the development of a Communication Enhanced Environment (see supplementary file for staff and volunteer information and consent forms). Patients were informed that the researchers wanted to explore how the hospital environment influenced patient activity (see supplementary file for patient information and consent forms).

1  
2  
3 All interviews and focus groups were conducted using interview and focus group  
4 guides (staff focus groups and interview guide Appendix B., patient interview guide  
5 Appendix C.) and were audio recorded. Field notes were completed by the first author  
6 during data collection. Seven staff focus groups were conducted with two to eight  
7 participants in each focus group. One-on-one interviews were conducted with two staff  
8 members. All staff focus groups were completed on the hospital site in various locations  
9 that were private and quiet. Six out of seven patient interviews were conducted in person  
10 during their inpatient admission in their hospital room, and one was completed over the  
11 phone (patient without aphasia) one day following discharge from hospital. All patient  
12 interviews were conducted within fifteen days post-stroke. Interview and focus groups were  
13 20-60 minutes long, often varying based on the number of participants. Supported  
14 conversation strategies<sup>12</sup> were used during interviews with patients with aphasia to  
15 facilitate their participation in the interview. One patient with aphasia had two family  
16 members present during the interview. During the interviews and focus groups, clarifying  
17 questions and paraphrasing participant comments were used to confirm and clarify their  
18 perspectives and insights.  
19  
20  
21  
22  
23  
24  
25  
26  
27  
28  
29  
30  
31  
32  
33  
34  
35  
36  
37  
38  
39  
40  
41  
42  
43  
44  
45  
46  
47  
48  
49  
50  
51  
52  
53  
54  
55  
56  
57  
58  
59  
60

1  
2  
3  
4  
5  
6  
7  
8  
9  
10  
11  
12  
13  
14  
15  
16  
17  
18  
19  
20  
21  
22  
23  
24  
25  
26  
27  
28  
29  
30  
31  
32  
33  
34  
35  
36  
37  
38  
39  
40  
41  
42  
43  
44  
45  
46  
47  
48  
49  
50  
51  
52  
53  
54  
55  
56  
57  
58  
59  
60

[Figure 1. inserted here]

For peer review only

Table 2. Patient characteristics

|                                                           | Group<br>(n=7) | PWA<br>(n = 3) | PWOA<br>(n = 4) |
|-----------------------------------------------------------|----------------|----------------|-----------------|
| Participants                                              |                |                |                 |
| Age (yr), mean (SD)                                       | 83 (7)         | 81 (5)         | 84 (8.10)       |
| Sex, n females                                            | 4              | 1              | 3               |
| Pre-morbid mobility, n needing aids                       | 1              | 1              | 0               |
| Pre-morbid living arrangement, n alone                    | 3              | 1              | 2               |
| Time since stroke (d), mean (SD)                          | 14 (5)         | 13 (7)         | 15 (5)          |
| Stroke severity (NIHSS <sup>13</sup> 0-42), mean (SD)     | 4 (3)          | 5 (4)          | 5 (3)           |
| Mild, n score < 8                                         | 5              | 2              | 3               |
| Moderate, n score 8-15                                    | 2              | 1              | 1               |
| Severe, n score > 15                                      | 0              | 0              | 0               |
| Mobility status at time of data collection                |                |                |                 |
| Independent +/- walking aid                               | 1              | 0              | 1               |
| Stand-by assistance                                       | 3              | 1              | 2               |
| 1-2 person assistance                                     | 2              | 1              | 1               |
| Hoist/wheelchair                                          | 1              | 1              | 0               |
| Cognition (MOCA <sup>14</sup> ), median (range)           | 18 (9-22)      | 16 (9-18)      | 20 (17-22)      |
| Aphasia severity, WAB-R <sup>11</sup> AQ mean, (SD)       |                | 77 (6.50)      |                 |
| Ward (d)                                                  |                |                |                 |
| Acute (%)                                                 | 4 (17)         | 4 (40)         | 0 (0)           |
| Rehabilitation (%)                                        | 19 (83)        | 6 (60)         | 13 (100)        |
| Average number of days in single room per participant (%) | 3.1 (96)       | 3 (90)         | 3.3 (100)       |

Notes: PWA= patient with aphasia; PWOA= patient without aphasia; NIHSS=National Institute of Health Stroke Scale<sup>13</sup>; MoCA= Montreal Cognitive Assessment<sup>14</sup>; WABAQ=Western Aphasia Battery-Revised<sup>11</sup> Aphasia Quotient score.

## Data analysis

Focus groups and interviews were transcribed verbatim. Responses to any leading questions were removed from the data set.<sup>15</sup>

The theoretical framework for this research was a qualitative description approach.<sup>16</sup> This approach involves describing patient experiences, with minimal interpretation of the data to minimise potential bias of the researchers.<sup>16</sup> Participant experiences were analysed using NVivo<sup>17</sup> computer software to manage the data. Data were grouped into themes according to content.<sup>16</sup> The first level of coding identified the broad content of the data then sub-categories were identified.<sup>16</sup> Single lines of data were not removed from their 'story' during data analysis to maintain the context and help ensure meaning was not lost or misinterpreted.<sup>16</sup> Ongoing critical review of the categories were conducted and themes were reviewed by a second researcher.<sup>16</sup> Staff were provided feedback on the findings.

## Results

The key themes from the focus group and interviews related to barriers and facilitators to communication, with sub-categories identified which related to hospital, staff and patient factors (Figure 2.).



1  
2  
3  
4  
5  
6  
7  
8  
9  
10  
11  
12  
13  
14  
15  
16  
17  
18  
19  
20  
21  
22  
23  
24  
25  
26  
27  
28  
29  
30  
31  
32  
33  
34  
35  
36  
37  
38  
39  
40  
41  
42  
43  
44  
45  
46  
47  
48  
49  
50  
51  
52  
53  
54  
55  
56  
57  
58  
59  
60

[Figure 2. inserted here]

For peer review only

## Barriers to Communication

### Hospital related factors

#### Private rooms reduce opportunities for social interaction

Staff and patients described the impact of single rooms which limited incidental socialisation with other patients and their visitors.

We used to co-locate our stroke patients [sic] and often using our shared rooms.

That's when people had more opportunities for interacting with one another.

(MedC1)

#### Mixed wards affect staff acquisition of specialist skills

Staff described their perception of the negative effect a mixed hospital ward had on the acquisition of stroke specific specialist skills.

Having a stroke specific ward... everybody on the ward would be trained...and that's the only thing they'd have to focus on rather than having lots of other patients with lots of medical conditions. (OT4)

#### Hospital environment does not encourage socialising

Staff talked about the physical hospital ward environment affecting social interaction as it contributed to a sterile atmosphere rather than one that promoted social activity. Staff also talked about the consequence of background noise and environmental distractors in large shared rooms on the acute ward which reduced their ability to communicate with patients with communication impairments.

My general feeling of rehab [rehabilitation] is that they come to their sessions and then they go back to their lonely dark room... I don't really see the rooms as a particularly happy, busy place where they are getting a lot out of being in there... the dining rooms... they're not a particularly pleasant place to be either. (PT2)

They [patients] can hear other people talking... there is [sic] a lot of voices going on which is going to impact on their understanding as well. (PT3)

#### Hospital policies restrict the development of communication-promoting ideas and initiatives

Hospital policies were perceived by staff as a barrier to communication, negatively influencing their ability to develop ideas and initiatives to increase patients' opportunities for social interaction. This included policies regarding leaving patients unattended in dining

1  
2  
3 areas without patient care assistants supervising them and requiring nurses to supervise  
4 patients if they are eating; and reported limitations around food related activities as a result  
5 of food hygiene policies and occupational health and safety.  
6  
7

8 It's just every time you try and do something you hit a barrier... you do try and think  
9 outside the box what more can you do for this patient and you get another hospital  
10 rule. (PT2)  
11  
12  
13

#### 14 **Power imbalance of staff and patients in hospital controls patients' ability to access** 15 **communication opportunities**

16 Staff and patients discussed the influence of the power imbalance for patients in  
17 hospital, and patient perceptions that they have to do what is expected in the hospital  
18 environment. This appeared to limit the patients' ability to freely engage and explore the  
19 environment resulting in patients retreating to their rooms and limiting their opportunities  
20 to engage in activities.  
21  
22  
23  
24  
25  
26

27 I think most males like to account for their time um and I felt like I haven't been able  
28 to do that and that's, that's the bit that I'm really, really lacking. (PWA2)

29 I was in the hospital so I think I had to stick into the room, to the rules. (PWOA2)

30 Very often when you're in a hospital you do what you think you're expected to do.  
31  
32  
33  
34 (SP4)  
35

#### 36 **Task specific communication reduces patients' communication opportunities**

37 Staff talked about the nature of interactions with patients as often being driven by  
38 the patient's care, restricting opportunities for communication beyond this context.  
39

40 I know we aim to be very holistic... but very often care is very[sic] directed from a  
41 medical health care perspective (SP4)  
42  
43  
44  
45

#### 46 **Staff related factors**

#### 47 **Staff's perception of time pressures limiting opportunities for communication**

48 Both patients and staff perceived staff time pressures as a barrier negatively  
49 effecting communication on the wards. This may be the reflection of actual time pressures,  
50 or staff perceptions of their available time. Some staff reported that they felt interactions  
51 with patients with communication impairments required extra time which was challenging  
52 in a time pressured hospital environment. Time pressures were also perceived to restrict the  
53 staff's ability to facilitate opportunities for patients to socialise with other patients. For  
54  
55  
56  
57  
58  
59  
60

1  
2  
3 example, nurses appeared to deprioritise transferring patients to the communal area for  
4 lunch in busier times.  
5

6  
7 If they're hoist patients it might not be as easy for staff to get them to the dining  
8 room, that wouldn't totally prevent someone from going, it would just depend on  
9 the time that people had on the day. (SW3)  
10  
11

### 12 **Staff and patient's underutilisation of available resources**

13  
14 Staff described the lack of accessible resources as a factor negatively affecting staff-  
15 patient communication. They described the need for resources when communicating with  
16 patients with aphasia and other communication impairments but felt unsure about what  
17 these were or how to access them. They also described a number of resources that they felt  
18 patients were not aware of and therefore did not utilise such as volunteer services that  
19 promote communication opportunities and facilitate patient access to outdoor areas.  
20  
21  
22  
23  
24

25  
26 I feel like I don't know where else to go. I don't know if other things that [sic] could  
27 help us, maybe there's things out there that I don't know about that would help us  
28 communicate with these patients. (PT2)  
29  
30

31  
32 There are all of these opportunities but I don't think a lot of the patients access them  
33 so it sounds like great communicative opportunities for them but the reality is that a  
34 lot of them are sitting in their rooms most of the times by themselves watching  
35 television and most of the interactions they have is with the nurses or just whoever  
36 comes in to see them. (SP4)  
37  
38  
39  
40

### 41 **Individual staff factors leading to restricted opportunities for communication**

42  
43 Staff described individual staff factors such as personality, values and attitudes  
44 influencing communication opportunities for patients, such as staff providing patients with  
45 opportunities for incidental social interaction during routine tasks.  
46  
47

48  
49 Often if people need to go in and see the patient let's just say to take obs  
50 [observations] or to do a wash... they don't always use that opportunity as an  
51 opportunity to chat... there could be more opportunity to chat at those times whilst  
52 they are doing what they need to get done and you know that varies from person to  
53 person, personality as well and how busy people are, what else is going on. (SP3)  
54  
55  
56

### 57 **Staff's perception their role does not include communication tasks**

1  
2  
3 Some staff perceived communication as a task separate from the responsibility of  
4 their role therefore limiting their facilitation of communication opportunities for patients.  
5

6 They [speech pathologists] do their bit and we do ours... we don't have time to  
7 practice speech with them because we really do have to get all of our jobs filled in  
8 the time and it's specifically rostered for us to do our work, not to help with  
9 someone else's. (RehabN1)  
10  
11  
12  
13

#### 14 **Lack of staff knowledge and skills resulting in unsuccessful communication interactions or** 15 **avoiding communication interactions** 16

17 Staff described a lack of knowledge and skills in communicating with patients with  
18 communication impairments. Some staff reported feeling anxious about encouraging  
19 patients to communicate as communication breakdowns may cause stress and anxiety for  
20 the patient, and the staff member. Staff reported a lack of confidence in their ability to  
21 repair communication breakdowns which resulted in increased time pressures in their  
22 sessions, often leading them to avoid encouraging communication interactions within their  
23 treatment sessions.  
24  
25  
26  
27  
28  
29

30 I find it challenging... knowing how the best way to communicate with that person  
31 [with aphasia]... then [they] become very frustrated and not have the tools  
32 themselves to communicate back to me and you would never want to leave  
33 someone in that space. So that's something that I struggle with. (SW2)  
34  
35  
36  
37

#### 38 **Patient related factors** 39

40 Patient related factors reflected their functional and medical status, personality,  
41 mood and motivation, which were perceived by staff and patients to often act as a barrier to  
42 engaging in communication interactions during their hospital admission early after stroke.  
43  
44

#### 45 **Patients' functional and medical status limiting their ability to seek out and engage in** 46 **activities** 47

48 Staff and patients perceived patients' medical status as a barrier to communication  
49 by limiting their ability to engage with their environment including independently seeking  
50 out activities and being able to utilise communal areas.  
51  
52  
53

54 If someone is bed bound, you know the interaction is very minimal... you often walk  
55 past and you see them alone in their room... you wonder what happens during those  
56 periods of time where they're just in their room and they don't have family. (OT2)  
57 Well, I can't do anything cos I can't go off by myself and do anything. (PWOA2)  
58  
59  
60

### **Individual patient factors limiting opportunities for communication**

Staff described individual patient factors such as personality, mood and motivation communication opportunities for patients such as independent practice of communication therapy tasks, and social opportunities with patients and hospital staff.

We have to recognise some patients who have had strokes... they're fed up with having people poking and prodding them then have a volunteer and go "do you want to do your exercises for speech?" (VM)

They need a break after OT [the occupational therapist] has done a shower. If they don't get that break then the physio isn't going to be as good for them because they're so tired, so we also have to look at break times in between each sessions... (OTA1)

### **Facilitators to Communication**

#### **Hospital related factors**

#### **Shared rooms/co-location encourages incidental social interactions**

Staff talked about use of communal areas at other hospitals which facilitated socialisation and communication during non-therapy times and during group therapy. Staff described the importance of the use of communal areas given the large number of private rooms on the ward. Patients also described the need to be co-located to promote social interaction.

I think that, put the [sic] whole lot of people together and ah and they [sic] something collective, that's what human beings are put together for ... sitting around talking... over the proverbial cuppa. (PWA2)

#### **Visitors provide patients opportunities for socialisation**

Staff identified visitors as a facilitator to communication interaction for patients outside of therapy times during their inpatient admission.

Interaction with the family... it's not therapy based but it's their [patients'] opportunity to practice. (PT1)

#### **Volunteers facilitate opportunities for patients to engage in social activities**

Staff discussed the benefit of volunteers in facilitating opportunities for patients to engage in social interactions including programs involving therapy dogs, book loaning, hand massages, and taking patients off the ward.

1  
2  
3 If we see people that are lonely, are not getting visitors, there's many volunteers... to  
4 go and visit them and if they're well enough they can take them out... the volunteers,  
5 we do rely on them. (OTA1)  
6  
7  
8  
9

## 10 **Staff related factors**

### 11 **Staff utilisation of resources promote communication exchange**

12 Staff identified access to resources such as chat books and alternative and  
13 augmentative communication boards often facilitated communication interactions with  
14 patients with communication impairments on the ward.  
15  
16  
17  
18

19 Sometimes with the ... signs... "do you want to drink? some water?" or something, so  
20 they can just point because ... they want to say something and maybe the right  
21 words are not coming out... that also helps. (RehabN3)  
22  
23  
24

### 25 **Speech pathology support and education facilitates staff's use of communication** 26 **promoting strategies**

27 Staff reported support and education from speech pathology staff facilitated their  
28 ability to interact successfully with patients with aphasia.  
29  
30  
31

32 I had a patient who had word finding difficulties... I just was observing the speechie  
33 [speech pathologist], she would just be like "no, what do you mean?" and he'll be  
34 like [pointing] and she'll be like "tell me what's the word"... it's something I could  
35 have just added to my session. (PT4)  
36  
37  
38  
39

### 40 **Staff knowledge and utilisation of communication strategies promotes communication** 41 **activities**

42 Staff and volunteers discussed the use of communication strategies and resources to  
43 facilitate communication on the ward for patients with a variety of communication  
44 impairments.  
45  
46  
47

48 We use communication boards, pictures, writing things down, talking slowly.  
49

50 (MedC2)

51 If they are having trouble, I will say to them "it's okay you don't need to hurry, that's  
52 fine". (V1)  
53  
54  
55

### 56 **Individual staff factors promote communication opportunities for patients**

1  
2  
3 Staff and patients talked about how individual characteristics of staff, including  
4 rapport building and being friendly, facilitated communication for patients with  
5 communication difficulties.  
6  
7

8 Sometimes they [patients] look for that specific person... the more they get  
9 confident, the more they get relaxed, the more their speech enhances as well.  
10  
11  
12 (RehabN3)  
13  
14  
15

## 16 Discussion

17 This study aimed to explore hospital staff, volunteers and patients' perceptions of  
18 barriers and facilitators to communication on an acute and a rehabilitation ward. A wide  
19 range of factors were perceived to act as potential barriers or facilitators to communication.  
20 Additionally, a number of factors influencing patient access to communication opportunities  
21 appeared to influence one another.  
22  
23  
24  
25  
26

27 The co-location of patients in therapy spaces, dining areas or in shared rooms were  
28 perceived as facilitators to communication for patients, providing opportunities for  
29 incidental social interactions with other patients and their visitors. However, background  
30 noise in these shared spaces was also perceived to act as a barrier to their ability to engage  
31 in communication. Patient access to communal spaces was influenced by a number of  
32 factors including patients' sense of autonomy to freely explore the hospital ward  
33 environment, and their medical and mobility status, and staff's perception of their available  
34 time, which influenced staff's perception of whether they transferred patients to these  
35 spaces. Rosbergen et al<sup>18</sup> reported that in an acute stroke ward enriched environment  
36 communal mealtimes and group activities were perceived to facilitate social activity. The  
37 study by Rosbergen et al<sup>18</sup> found that staff reported perceptions that shared rooms limited  
38 staff and patients' ability to engage in private conversations, consistent with O'Halloran et  
39 al's<sup>19</sup> findings. It may be that access to both private and communal spaces available within  
40 the hospital environment play critical roles in regards to providing opportunities for social  
41 interactions with other patients and their visitors and opportunities for privacy when  
42 required.  
43  
44  
45  
46  
47  
48  
49  
50  
51  
52  
53  
54  
55

56 The acute and rehabilitation wards had a large proportion of single rooms, which  
57 could have been considered the result of this study being conducted at a private hospital.  
58 However, there has been a perceived trend towards increased proportions of single rooms  
59  
60



1  
2  
3 in newly built public hospitals to promote infection control and patient privacy which may  
4 have a detrimental effect on communication.<sup>20,21</sup> The predominance of single rooms and  
5 limited opportunities to access shared spaces may have increased the effect of other  
6 barriers on communication opportunities for patients. For example, a patient with poor  
7 autonomy may be more likely to remain alone in their single room when they are not  
8 attending therapy, as they perceive they are not 'allowed' to freely explore the hospital  
9 environment. This may reduce the likelihood of the individual independently seeking out  
10 social interactions beyond their room. If they also have reduced mobility, they may be more  
11 reliant on staff to facilitate transfers to communal spaces which may be impacted by staff  
12 time constraints. The patient's functional status and levels of fatigue may also limit their  
13 ability to initiate and engage in activities while they are in their room. Therefore, the  
14 combined effect of these barriers may significantly limit this patient's communication  
15 opportunities.

16  
17  
18  
19  
20  
21  
22  
23  
24  
25  
26  
27  
28  
29  
30  
31  
32  
33  
34  
35  
36  
37  
38  
39  
40  
41  
42  
43  
44  
45  
46  
47  
48  
49  
50  
51  
52  
53  
54  
55  
56  
57  
58  
59  
60  
These communication barriers may be mitigated by having scheduled rest periods,  
and periods allocated to encouraging visitors to provide opportunities for communication  
and socialisation within their room, and facilitate patient access to shared spaces, such as  
helping mobilise wheelchair users into communal dining areas or education to patients that  
they are allowed to explore the hospital ward environment. Rosbergen et al<sup>18</sup> identified  
patient and family autonomy to initiate and direct activity as a factor enriching the acute  
ward environment. Therefore, increasing patient autonomy within this setting may facilitate  
their ability to seek out interactions within the environment and increase engagement in  
communication activity, which may then reduce the effect of being in a single room with  
reduced mobility and time poor staff.

A potential lack of opportunities to access social interactions with other patients  
means staff, including volunteers, and visitors may become the main communication  
partner for patients. Godecke et al's<sup>6</sup> observation study found that nurses are the most  
frequent communication partner for patients following stroke with aphasia, after their  
family members, therefore patient-staff interactions may play a significant role for those  
patients with minimal or no visitors. It is interesting to note that this study recruited a  
limited number of acute nurses in comparison to rehabilitation nurses. This could be  
interpreted as a reflection of differences in nurses' capacity for additional activities within  
the demands and time restrictions of the acute ward context in comparison to the

1  
2  
3 rehabilitation ward context. Within the current study, communication between staff and  
4 patients appeared to be dependent on a number of factors including staff perception of  
5 their role, their knowledge and skills in facilitating communication, their values and  
6 attitudes towards communication and whether supporting language and communication for  
7 patients with aphasia is part of their 'role', their willingness to be flexible with their time,  
8 and their knowledge of and access to resources which may be used to facilitate  
9 communication. This also highlights the potential impact of the perceived power imbalance  
10 between staff and patients and the significance of interactions that are task directed. Hersh  
11 et al<sup>21</sup> reported patients with aphasia felt disempowered in communicative interactions  
12 with nurses. Nurses often talked to the task and controlled interactions with  
13 patients.<sup>22,23</sup> This highlights the need for communication partner training which may provide  
14 staff with the knowledge and skills required to support effective communication with  
15 patients with aphasia.<sup>24</sup> Implementation strategies will need to be considered to promote  
16 behaviour change as well as the uptake and maintenance of training including involvement  
17 of management and ward champions, and ensuring trained communication strategies are  
18 easy to learn, apply and audit in order to be applicable in this busy context.<sup>25</sup>

19  
20  
21  
22  
23  
24  
25  
26  
27  
28  
29  
30  
31  
32  
33  
34  
35  
36  
37  
38  
39  
40  
41  
42  
43  
44  
45  
46  
47  
48  
49  
50  
51  
52  
53  
54  
55  
56  
57  
58  
59  
60

Time pressure was perceived as a major barrier to communication impacting on staff's ability to support successful communication within their interactions with patients and facilitate patients' opportunities to engage in interactions in social or communal areas. Time constraints have been reported to limit communicative opportunities between patients following stroke and nurses.<sup>26</sup> Ball et al<sup>26</sup> found that 86% of surveyed nurses reported one or more activities had been "left undone" in their last shift as a result of lack of time. The study found that activities most likely to be missed by nurses as a result of time constraints were comforting and talking to patients (66%) and patient education (52%).<sup>26</sup> This has also been identified by patients who "did not like to bother the busy nurse".<sup>27</sup> Time limitations and pressures on the wards may be facilitated by developing staff knowledge of and skills in using communication promoting strategies. Effective and efficient nurse patient communication as a result of nurse training has been found to save time, reduce frustration and reduce the burden associated with caring for patients following stroke with aphasia.<sup>28</sup> Additionally, time limitations reported by staff may lend to an argument for additional nursing allocation for patients with communication impairments.

1  
2  
3 This study included a small number of medical and nursing staff in comparison to  
4 compared to allied health staff which may be reflected in the reported results. This study  
5 also involved a small number of patients and a broader range of perspectives may have  
6 been expressed with a larger number of participants. This study was conducted at a private  
7 hospital involving a mixed acute and a mixed rehabilitation ward, and a relatively  
8 homogenous groups of participants linguistically and ethnically, therefore these results  
9 reflect this context and may not be directly generalisable to hospitals in the public sector,  
10 nor did they explore cultural factors contributing to communication.  
11  
12  
13  
14  
15  
16  
17

### 18 **Conclusions**

19 The barriers and facilitators to communication appear to be interconnected and  
20 likely to influence one another, suggesting that the level of communication access may vary  
21 from patient to patient within the same setting. Results of this study highlight a number of  
22 practical changes that could be implemented to promote communication opportunities for  
23 patients admitted to hospital early after stroke. However, implementation of behaviour and  
24 cultural change strategies may be pertinent to promote meaningful and sustainable change  
25 within the hospital setting. Consideration of areas for co-location for patients such as  
26 therapy spaces, dining areas or shared rooms as well as access to private spaces may  
27 potentially address the need for social opportunities with other patients as well as access to  
28 privacy when required. The promotion of visitors attending the wards may facilitate  
29 communication opportunities for patients between therapy times by providing socialisation  
30 in patients' rooms as well as facilitating and advocating for patient access to communal  
31 areas. This has the potential to mitigate the effect of social isolation in single rooms, staff  
32 time restraints and limitations as a result of patients' medical status. Strategies to promote  
33 patient autonomy in hospital may promote their ability to freely explore the environment  
34 beyond their room may help address the power imbalance that can occur between patients  
35 and hospital staff. Additionally, health staff and volunteer education in using  
36 communication promoting strategies may increase opportunities for interactions between  
37 patients, and staff or volunteers and promote communication exchange within those  
38 interactions. These factors will be explored in a Communication Enhanced Environment,  
39 which aims to increase patients' opportunities to engage in language activities during early  
40 stroke recovery in hospital.  
41  
42  
43  
44  
45  
46  
47  
48  
49  
50  
51  
52  
53  
54  
55  
56  
57  
58  
59

### 60 **Acknowledgements**

1  
2  
3 The authors would like to thank the hospital and staff for supporting this study and  
4 assisting in participant recruitment. We would also like to thank all the participants in this  
5 study for sharing their experiences and insights.  
6  
7

### 8 9 **Author contributions**

10  
11 SD, EG, NC, DH, HJ and EA designed the study and the protocol. EG reviewed the final  
12 copies of the protocol documents. SD conducted the semi-structured interviews and focus  
13 groups. SD performed data analysis. DH conducted the critical review of the categories and  
14 review of themes. SD, EG, NC, DH, HJ and EA contributed to the manuscript and approved  
15 the manuscript.  
16  
17

### 18 19 **Competing interests statement**

20  
21 This research was funded by The Hollywood Private Hospital Research Grant (RF087).  
22 SD received an Australian Post Graduate Award Scholarship for the first year of this study  
23 and received an ECU Research Travel Grant. The authors have no other competing interests  
24 to declare.  
25  
26

### 27 28 **Funding statement**

29  
30 This work was supported by the Hollywood Private Hospital Research Foundation  
31 grant number RF087. SD received an Australian Post Graduate Award Scholarship for the  
32 first year of this study and received an ECU Research Travel Grant.  
33  
34

### 35 36 **Data sharing statement**

37  
38 Patient interview and staff focus group data are stored in the Edith Cowan University data storage  
39 repository. This data will be available in a de-identified format by request through the first author  
40 ORCID <https://orcid.org/0000-0001-6221-3229>. The availability and use of the data are governed by  
41 Edith Cowan University Research Ethics.  
42  
43

### 44 45 **Figures**

46  
47 Figure 1. Summary of patient screening and recruitment.

48  
49 Figure 2. Summary of themes and subthemes of staff and patient perceptions to barriers  
50 and facilitators to patient following stroke.  
51  
52  
53  
54  
55  
56  
57  
58  
59  
60

## References

1. Ali M, Brady M, Ali M, et al. Predictors of post-stroke aphasia recovery: a systematic review-informed individual participant data (IPD) meta-analysis. *Stroke*; 2021 (*In Press*).
2. Robey, RR. A meta-analysis of clinical outcomes in the treatment of aphasia. *J Speech Lang Hear Res.* 1998;41(1): 172-187.
3. Fazio S, Stocking J, Kuhn B, et al. How much do hospitalized adults move? A systematic review and meta-analysis. *Appl Nurs Res.* 2019; <https://doi.org/10.1016/j.apnr.2019.151189>
4. Kevdzija M & Marquardt G. Stroke patients' nonscheduled activity during inpatient rehabilitation and its relationship with architectural layout: A multicenter shadowing study; *Top Stroke Rehabil.* 2021; <https://doi.org/10.1080/10749357.2020.1871281>
5. Janssen H, Ada L, Bernhardt J, et al. Physical, cognitive and social activity levels of stroke patients undergoing rehabilitation within a mixed rehabilitation unit. *Clin Rehabil.* 2014;28: 91–101.
6. Godecke E, Armstrong E, Hersh D, et al. Missed Opportunities: Communicative interactions in early stroke recovery. Conference presentation at Stroke Society of Australasia Annual Scientific Meeting; 2014; Hamilton Island, Queensland.
7. Eng X, Brauer SG, Kuys SS, et al. Factors affecting the ability of the stroke survivor to drive their own recovery outside of therapy during inpatient stroke rehabilitation. *Stroke Research and Treatment.* 2014: 1-8.
8. Kenah K, Bernhardt J, Cumming T, et al. Boredom in patients with acquired brain injuries during rehabilitation: A scoping review, *Disabil & Rehab.* 2018;40(22): 2713-22.
9. Tong A, Sainsbury, Craig J. Consolidated criteria for reporting qualitative research (COREQ): A 32-item checklist for interviews and focus groups. *International Journal for Quality in Health Care.* 2007;19(6): 349-357.
10. Teasdale G, Jennett B. Assessment of coma and impaired consciousness. A practical scale. *Lancet.* 1974;2(7872): 81–4.
11. Kertesz A. *Western Aphasia Battery- Revised.* San Antonio, TX, Harcourt Assessment; 2006.
12. Kagan, A. Supported conversation for adults with aphasia: methods and resources for training conversation partners. *Aphasiology.* 1998;12(9): 816-830.

- 1  
2  
3 13. NIH stroke scale [Internet]. Bethesda, Md, National Institute of Neurological Disorders  
4 and Stroke (U.S.). 2011 [cited 2016 Feb 10]. Available from  
5  
6 [https://www.ninds.nih.gov/sites/default/files/NIH\\_Stroke\\_Scale.pdf](https://www.ninds.nih.gov/sites/default/files/NIH_Stroke_Scale.pdf)  
7
- 8 14. Nasreddine ZS, Phillips NA, Bédirian V, et al. The Montreal Cognitive Assessment, MoCA:  
9 a brief screening tool for mild cognitive impairment. *J Am Geriatr Soc.* 2005;53(4): 695-9.  
10
- 11 15. Milne J, Oberle K. Enhancing rigour in qualitative description: A case study. *J Wound*  
12 *Ostomy Continence Nurs.* 2005;32(6): 413-420.  
13
- 14 16. Neergaard MA, Olesen F, Anderson RS, et al. Qualitative description- the poor cousin of  
15 health research. *BMC Med Res Methodol.* 2009;9(1): 52-7.  
16
- 17 17. NVivo qualitative data analysis software; QSR International Pty Ltd. Version 12, 2018.  
18
- 19 18. Rosbergen IC, Brauer SG, Fitzhenry S, et al. Qualitative investigation if the perceptions  
20 and experiences of nursing and allied health professionals involved in the implementation of  
21 an enriched environment in and Australian acute stroke unit. *BMJ Open.* 2017 Dec 21; 7(12):  
22 e018226.  
23
- 24 19. O'Halloran R, Grohn B, Worrall L. Environmental factors that influence communication  
25 for patients with a communication disability in acute hospital stroke units: A qualitative  
26 metasynthesis. *Arch Phys Med Rehabil.* 2012;93(1): S77-S85.  
27
- 28 20. Ana°ker A, von Koch L, Heylighen A, et al. "It's lonely: Patients' experiences of the  
29 physical environment at a newly built stroke unit. *Health Environments Research & Design*  
30 *Journal.* 2017;12(3): 141-52.  
31
- 32 21. Shannon MM, Lipson-Smith R, Elf M, et al. Bringing the single versus multi-patient room  
33 debate to vulnerable patient populations: A systematic review of the impact of room types  
34 on hospitalized older people and people with neurological disorders. *Intelligent Buildings*  
35 *International.* 2018; <https://doi.org/10.1080/17508975.2018.154833>  
36
- 37 22. Hersh D, Godecke E, Armstrong E, et al. "Ward talk": Nurses' interaction with people  
38 with and without aphasia in the very early period poststroke. *Aphasiology.* 2016;30(5): 609-  
39 628.  
40
- 41 23. Costa A. Doing nothing? An ethnography of patients' (In)activity on an acute stroke unit.  
42 2021. *Health*; doi: 10.1177/1363459320969784  
43
- 44 24. Simmons-Mackie N, Raymer A, Armstrong E, et al. Communication partner training in  
45 aphasia: A systematic review. *Arch Phys Med Rehabil.* 2010;91: 1814-1837.  
46  
47  
48  
49  
50  
51  
52  
53  
54  
55  
56  
57  
58  
59  
60

- 1  
2  
3 25. Shrubsole K, Worrall L, Power E. Closing the evidence-practice gaps in aphasia  
4 management; Are we there yet? Where has a decade of implementation research taken us?  
5 A review and guide for clinicians. *Aphasiology*. 2019;33(8): 970-95.  
6  
7  
8 26. Ball JE, Murrells T, Rafferty AM, et al. 'Care left undone' during nursing shifts:  
9 Associations with workload and perceived quality of care. *BMJ Qual Saf*, 2014;23(2): 116–  
10 125.  
11  
12 27. McCabe C. Nurse–patient communication: An exploration of patients' experiences. *J Clin*  
13 *Nurs*. 2004;13: 41–49.  
14  
15 28. McGilton K, Sorin-Peters R, Sidani S, et al. Focus on communication: Increasing the  
16 opportunity for successful staff–patient interactions. *Int J Older People Nurs*. 2009;6: 13–24.  
17  
18  
19  
20  
21  
22  
23  
24  
25  
26  
27  
28  
29  
30  
31  
32  
33  
34  
35  
36  
37  
38  
39  
40  
41  
42  
43  
44  
45  
46  
47  
48  
49  
50  
51  
52  
53  
54  
55  
56  
57  
58  
59  
60

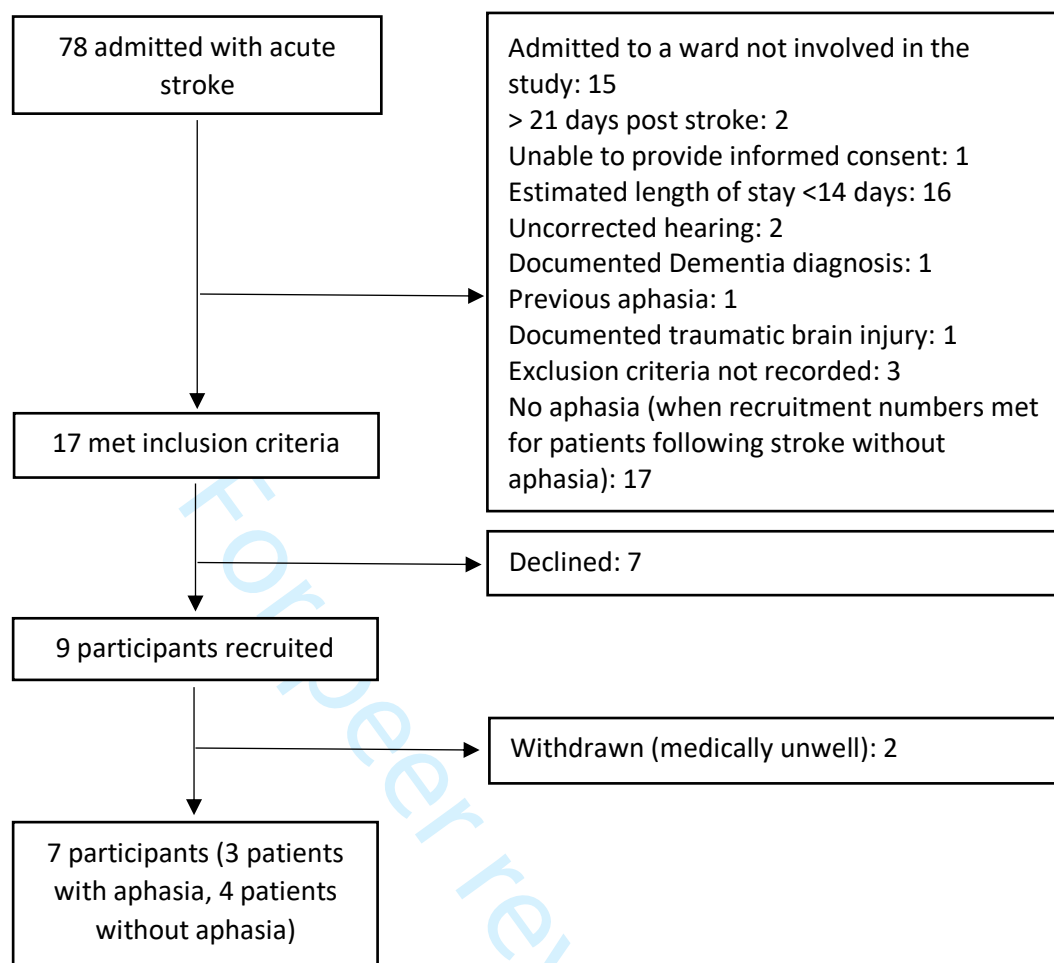

Figure 1. Summary of patient screening and recruitment



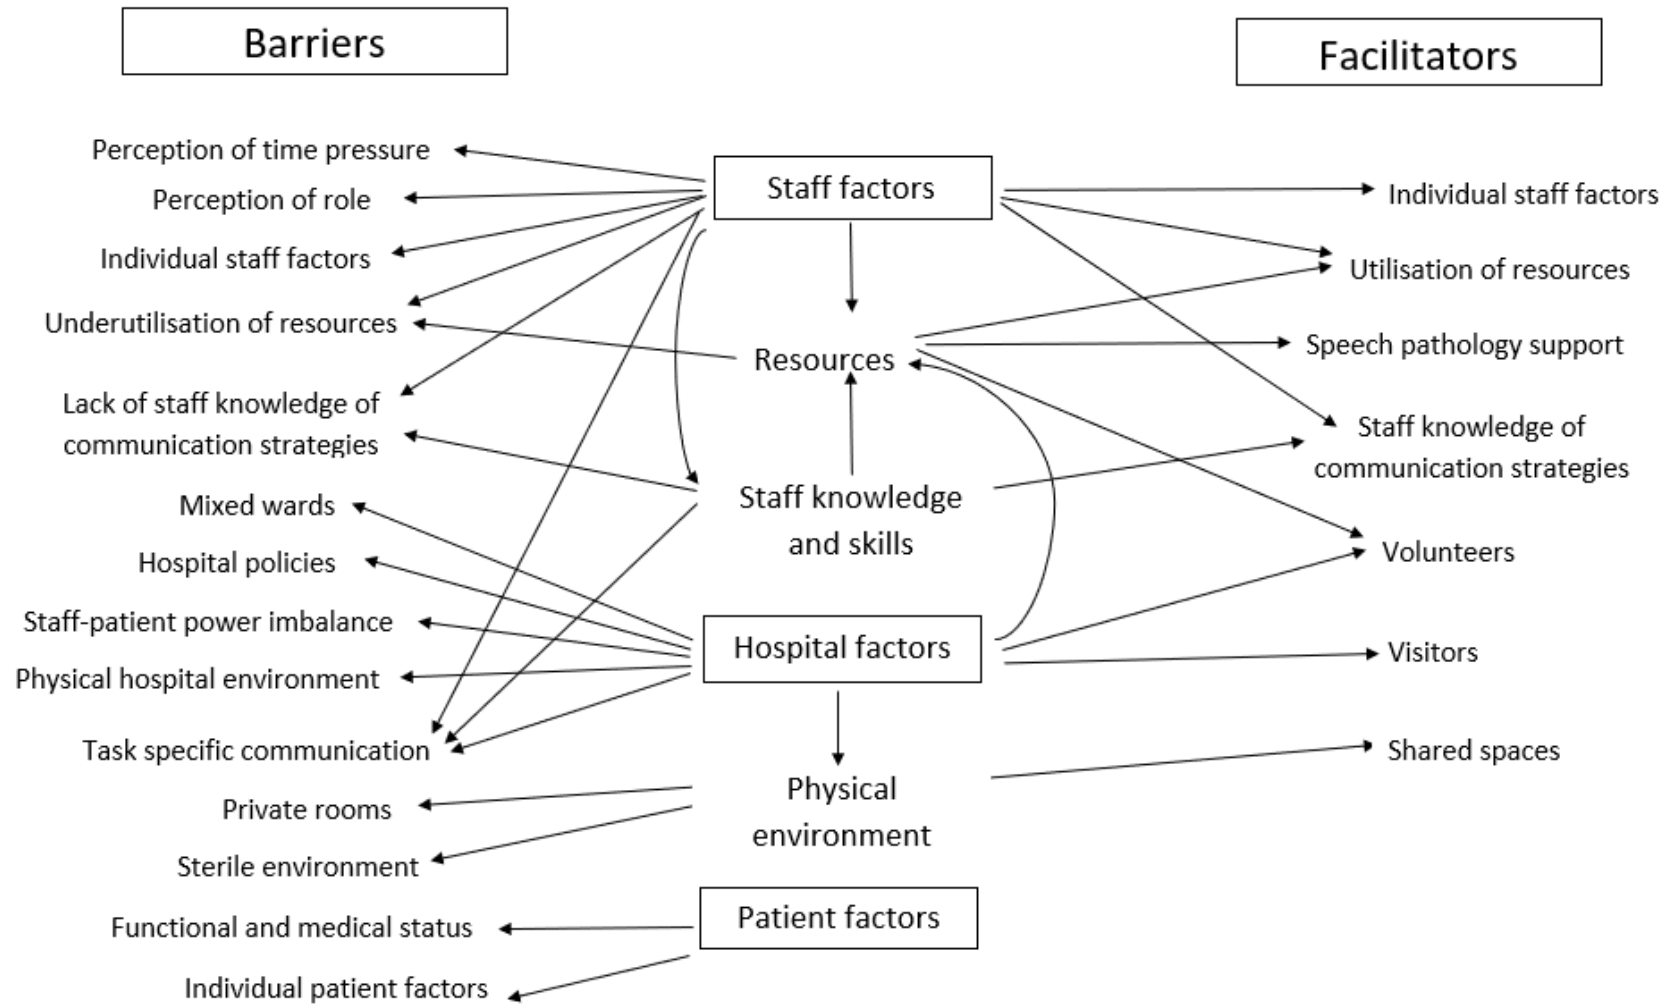

Figure 2. Summary of themes and subthemes of staff and patient perceptions to barriers and facilitators to patient communication in hospital.

## Appendix A.

Consolidated criteria for reporting qualitative studies (COREQ)<sup>9</sup>: 32-item checklist

| No Item                                     | Guide questions/description                                                                                                               | Location within paper                                                   |
|---------------------------------------------|-------------------------------------------------------------------------------------------------------------------------------------------|-------------------------------------------------------------------------|
| Domain 1: Research team and reflexivity     |                                                                                                                                           |                                                                         |
| Personal Characteristics                    |                                                                                                                                           |                                                                         |
| 1. Interviewer/facilitator                  | Which author/s conducted the interview or focus group?                                                                                    | Page 10                                                                 |
| 2. Credentials                              | What were the researcher's credentials? E.g. PhD, MD                                                                                      | Page 10                                                                 |
| 3. Occupation                               | What was their occupation at the time of the study?                                                                                       | Page 10                                                                 |
| 4. Gender                                   | Was the researcher male or female?                                                                                                        | Page 10                                                                 |
| 5. Experience and training                  | What experience or training did the researcher have?                                                                                      | Page 10                                                                 |
| Relationship with participants              |                                                                                                                                           |                                                                         |
| 6. Relationship established                 | Was a relationship established prior to study commencement?                                                                               | Page 7                                                                  |
| 7. Participant knowledge of the interviewer | What did the participants know about the researcher? e.g. personal goals, reasons for doing the research                                  | Supplementary files, participant information and consent forms, page 10 |
| 8. Interviewer characteristics              | What characteristics were reported about the interviewer/facilitator? e.g. Bias, assumptions, reasons and interests in the research topic | Page 10                                                                 |
| Domain 2: study design                      |                                                                                                                                           |                                                                         |
| Theoretical framework                       |                                                                                                                                           |                                                                         |

|                                          |                                                                                                                                                          |                        |
|------------------------------------------|----------------------------------------------------------------------------------------------------------------------------------------------------------|------------------------|
| 9. Methodological orientation and Theory | What methodological orientation was stated to underpin the study? e.g. grounded theory, discourse analysis, ethnography, phenomenology, content analysis | Page 13                |
| Participant selection                    |                                                                                                                                                          |                        |
| 10. Sampling                             | How were participants selected? e.g. purposive, convenience, consecutive, snowball                                                                       | Page 8, 10             |
| 11. Method of approach                   | How were participants approached? e.g. face-to-face, telephone, mail, email                                                                              | Page 8, 10             |
| 12. Sample size                          | How many participants were in the study?                                                                                                                 | Page 8, 10             |
| 13. Non-participation                    | How many people refused to participate or dropped out? Reasons?                                                                                          | Figure 1, page 8       |
| 14. Setting                              | Setting of data collection Where was the data collected? e.g. home, clinic, workplace                                                                    | Page 7-8               |
| 15. Presence of non-participants         | Was anyone else present besides the participants and researchers?                                                                                        | Page 11                |
| 16. Description of sample                | What are the important characteristics of the sample? e.g. demographic data, date                                                                        | Table 2, page 12       |
| Data collection                          |                                                                                                                                                          |                        |
| 17. Interview guide                      | Were questions, prompts, guides provided by the authors? Was it pilot tested?                                                                            | Appendix B, Appendix C |
| 18. Repeat interviews                    | Were repeat interviews carried out? If yes, how many?                                                                                                    | NA                     |
| 19. Audio/visual recording               | Did the research use audio or visual recording to collect the data?                                                                                      | Page 10                |
| 20. Field notes                          | Were field notes made during and/or after the interview or focus group?                                                                                  | Page 10                |
| 21. Duration                             | What was the duration of the interviews or focus group?                                                                                                  | Page 11                |

|                                    |                                                                                                                                   |            |
|------------------------------------|-----------------------------------------------------------------------------------------------------------------------------------|------------|
| 22. Data saturation                | Was data saturation discussed?                                                                                                    | Page 5     |
| 23. Transcripts returned           | Were transcripts returned to participants for comment and/or correction?                                                          | No         |
| Domain 3: analysis and findings    |                                                                                                                                   |            |
| Data analysis                      |                                                                                                                                   |            |
| 24. Number of data coders          | How many data coders coded the data?                                                                                              | Page 13    |
| 25. Description of the coding tree | Did authors provide a description of the coding tree?                                                                             | Figure 2   |
| 26. Derivation of themes           | Were themes identified in advance or derived from the data?                                                                       | Page 13    |
| 27. Software                       | What software, if applicable, was used to manage the data?                                                                        | Page 13    |
| 28. Participant checking           | Did participants provide feedback on the findings?                                                                                | Page 13    |
| Reporting                          |                                                                                                                                   |            |
| 29. Quotations presented           | Were participant quotations presented to illustrate the themes / findings? Was each quotation identified? e.g. participant number | Page 14-20 |
| 30. Data and findings consistent   | Was there consistency between the data presented and the findings?                                                                | Page 14-20 |
| 31. Clarity of major themes        | Were major themes clearly presented in the findings?                                                                              | Figure 2   |
| 32. Clarity of minor themes        | Is there a description of diverse cases or discussion of minor themes?                                                            | Page 14-20 |

## Appendix B.

### Investigating Communication Enhanced Environments after stroke: Staff focus group guide

What kind of language activities or language tasks do patients following stroke currently participate in on the ward?

What kind of language activities or language tasks would you like see patients following stroke have access to on the wards?

Describe your experience of communicating with patients following stroke at the moment.

Can you tell me about anything that facilitates your ability to communicate with patients following stroke on the ward?

Can you tell me about any barriers you experience that impact your ability to communicate with patients following stroke on the ward?

What changes would you like to see to enhance communication between staff and patients following stroke on the ward?

What changes would you like to see to enhance communication between visitors and patients following stroke on the ward?

How could we enhance or optimise communication and language tasks and activities for patients following stroke on the ward?

What do you think a communication and language enhanced stroke ward environment might look like?

**Appendix C.****Investigating Communication Enhanced Environments after stroke: Patient interview guide**

Tell me about what kind of activities you do while you are here (in hospital).

Describe your experience of communicating with people on the ward.

What makes it easier to communicate with people on the ward?

What makes it hard to communicate with people on the ward?

What can we do to make communicating with people easier?

1 **Investigating a Communication Enhanced Environment (CEE) model early after stroke: A before-after non-**  
2 **randomised controlled pilot study.**

3  
4 **Study protocol version 1 19.05.20**

5  
6  
7 **Edith Cowan University**

8  
9  
10  
11 **Chief Investigator**

12 Sarah D'Souza

13 PhD student

14 School of Psychology and Social Sciences

15 Edith Cowan University

16 270 Joondalup Drive,

17 JOONDALUP WA 6027

18 s.dsouza@ecu.edu.au

19  
20  
21  
22  
23  
24  
25  
26  
27  
28  
29  
30  
31 **Co-Investigators**

32 Associate Professor Erin Godecke, Edith Cowan University

33 Associate Professor Natalie Ciccone, Edith Cowan University

34 Dr Heidi Janssen, Hunter New England Local Health District, NSW Health

35 Associate Professor Deborah Hersh, Edith Cowan University

36 Professor Elizabeth Armstrong, Edith Cowan University

37  
38  
39  
40  
41  
42  
43  
44  
45  
46  
47 **Site Investigators**

48 Claire Tucak, Hollywood Private Hospital

49 Sarah Wynn, Hollywood Private Hospital

50 Millie Gallan-Dwyer, Hollywood Private Hospital

## Table of Contents

|    |                                                           |           |
|----|-----------------------------------------------------------|-----------|
| 1  |                                                           |           |
| 2  |                                                           |           |
| 3  | <b>1. Abbreviations and Definitions of Terms.....</b>     | <b>3</b>  |
| 4  |                                                           |           |
| 5  | <b>2. Protocol Synopsis.....</b>                          | <b>4</b>  |
| 6  |                                                           |           |
| 7  | <b>3. Introduction.....</b>                               | <b>7</b>  |
| 8  |                                                           |           |
| 9  | <b>4. Objectives.....</b>                                 | <b>7</b>  |
| 10 |                                                           |           |
| 11 | <b>5. Study Design.....</b>                               | <b>7</b>  |
| 12 |                                                           |           |
| 13 | <b>6. Study Population.....</b>                           | <b>7</b>  |
| 14 |                                                           |           |
| 15 | <b>7. Study Assessment and Procedures.....</b>            | <b>8</b>  |
| 16 |                                                           |           |
| 17 | <b>8. Study Treatment.....</b>                            | <b>8</b>  |
| 18 |                                                           |           |
| 19 | <b>9. Participant Completion and Discontinuation.....</b> | <b>9</b>  |
| 20 |                                                           |           |
| 21 | <b>10. Data Analysis.....</b>                             | <b>9</b>  |
| 22 |                                                           |           |
| 23 | <b>11. Data Management.....</b>                           | <b>9</b>  |
| 24 |                                                           |           |
| 25 | <b>12. Study Report.....</b>                              | <b>10</b> |
| 26 |                                                           |           |
| 27 | <b>13. Administration Procedures.....</b>                 | <b>10</b> |
| 28 |                                                           |           |
| 29 | <b>14. References.....</b>                                | <b>11</b> |
| 30 |                                                           |           |
| 31 | <b>Appendix A. Behavioural mapping tool.....</b>          | <b>12</b> |
| 32 |                                                           |           |
| 33 | <b>Appendix B. Patient interview guide.....</b>           | <b>13</b> |
| 34 |                                                           |           |
| 35 | <b>Appendix C. Staff focus group guide.....</b>           | <b>14</b> |
| 36 |                                                           |           |
| 37 |                                                           |           |
| 38 |                                                           |           |
| 39 |                                                           |           |
| 40 |                                                           |           |
| 41 |                                                           |           |
| 42 |                                                           |           |
| 43 |                                                           |           |
| 44 |                                                           |           |
| 45 |                                                           |           |
| 46 |                                                           |           |
| 47 |                                                           |           |
| 48 |                                                           |           |
| 49 |                                                           |           |
| 50 |                                                           |           |
| 51 |                                                           |           |
| 52 |                                                           |           |
| 53 |                                                           |           |
| 54 |                                                           |           |
| 55 |                                                           |           |
| 56 |                                                           |           |
| 57 |                                                           |           |
| 58 |                                                           |           |
| 59 |                                                           |           |
| 60 |                                                           |           |



## 1 Abbreviations and Definitions of Terms

**CEE model:** Communication Enhanced Environment model, an adapted model of an Enriched Environment, an environment that provides stroke patients opportunities to engage in language activities during inpatient rehabilitation.

**PWA:** Patients following stroke with aphasia.

**PWOA:** Patients following stroke without aphasia.

**Language activities:** Language tasks that consist of solitary or interactive language activities.

**Solitary language activities:** Activities that may promote aphasia recovery such as reading, writing, listening to the radio, and the use of iPad applications.

**Interactive language activities:** activities which are based in communicative interactions that involve an exchange of information with a communication partner involving talking, gesture and/or facial expression, reading, writing or drawing to communicate.

**EE:** Enriched Environment, an environment that promotes physical, cognitive and social activity.

## 2. Protocol Synopsis

|                                   |                                                                                                                                                                                                                                                                                                                                                                                                                                                                                                                                                                                                                                                                                                                                                                                                                                                                                                                                                                                                                                                                                                                                                                                                                                                                                                                                                                                                                                                                                                                                                                                                                                                                                                                                                                                                                                                                                                                                                                                                                                                                                                                                                                                                                                                                                                                                                                                                                                                                                                                                                                                                                                                                                                                                                                                                                                                                                                                                                                                                                                                                                            |
|-----------------------------------|--------------------------------------------------------------------------------------------------------------------------------------------------------------------------------------------------------------------------------------------------------------------------------------------------------------------------------------------------------------------------------------------------------------------------------------------------------------------------------------------------------------------------------------------------------------------------------------------------------------------------------------------------------------------------------------------------------------------------------------------------------------------------------------------------------------------------------------------------------------------------------------------------------------------------------------------------------------------------------------------------------------------------------------------------------------------------------------------------------------------------------------------------------------------------------------------------------------------------------------------------------------------------------------------------------------------------------------------------------------------------------------------------------------------------------------------------------------------------------------------------------------------------------------------------------------------------------------------------------------------------------------------------------------------------------------------------------------------------------------------------------------------------------------------------------------------------------------------------------------------------------------------------------------------------------------------------------------------------------------------------------------------------------------------------------------------------------------------------------------------------------------------------------------------------------------------------------------------------------------------------------------------------------------------------------------------------------------------------------------------------------------------------------------------------------------------------------------------------------------------------------------------------------------------------------------------------------------------------------------------------------------------------------------------------------------------------------------------------------------------------------------------------------------------------------------------------------------------------------------------------------------------------------------------------------------------------------------------------------------------------------------------------------------------------------------------------------------------|
| <p><b>Study Title:</b></p>        | <p>Investigating a Communication Enhanced Environment model on acute and rehabilitation wards early after stroke: A before-after non-randomised controlled pilot study</p>                                                                                                                                                                                                                                                                                                                                                                                                                                                                                                                                                                                                                                                                                                                                                                                                                                                                                                                                                                                                                                                                                                                                                                                                                                                                                                                                                                                                                                                                                                                                                                                                                                                                                                                                                                                                                                                                                                                                                                                                                                                                                                                                                                                                                                                                                                                                                                                                                                                                                                                                                                                                                                                                                                                                                                                                                                                                                                                 |
| <p><b>Study type:</b></p>         | <p>Interventional</p>                                                                                                                                                                                                                                                                                                                                                                                                                                                                                                                                                                                                                                                                                                                                                                                                                                                                                                                                                                                                                                                                                                                                                                                                                                                                                                                                                                                                                                                                                                                                                                                                                                                                                                                                                                                                                                                                                                                                                                                                                                                                                                                                                                                                                                                                                                                                                                                                                                                                                                                                                                                                                                                                                                                                                                                                                                                                                                                                                                                                                                                                      |
| <p><b>Study Intervention:</b></p> | <p>A Communication Enhanced Environment (CEE) model will be developed from pre-intervention observations of inpatient language activities and investigations of barriers and facilitators to communication together through focus groups with hospital staff and interviews with patients on the acute and rehabilitation wards.</p> <p>Sixteen patients following stroke will be recruited in this prospective before-after non-randomised controlled pilot study set in an acute and a rehabilitation ward of a metropolitan private hospital. The study includes: i) The baseline phase which involves observation of patients following stroke (n=8, 4 patients with aphasia (PWA) and 4 patients without aphasia (PWOA)); the collection of qualitative data through focus groups and semi-structured interviews to determine patient and staff perceived barriers and facilitators to communication; ii) the implementation phase where a CEE model will be developed and embedded in usual care; iii) the post-implementation phase which will involve repeated baseline data collection on a different cohort of patients (n=8, 4 PWA and 4 PWOA) to determine i) how solitary and interactive language activity levels changed following implementation of the CEE model, ii) the differences post CEE implementation in hospital staff's use of communication promoting strategies when interacting with patients, iii) the differences post CEE implementation in staff and patient perceptions of the barriers and facilitators to inpatient language activities.</p> <p>The CEE model will include the provision of:</p> <p>i) CEE model equipment, for example reading materials such as books and magazines, and access and encouragement to reside in a communal dining area;</p> <p>ii) CEE model education, support and training for staff with the aim to develop the ability to facilitate language activities for patients after stroke. The training program will be guided by research evidence, expert opinion and baseline data. Staff will complete a questionnaire pre and post training to determine changes in their knowledge, skills and attitudes regarding communication and aphasia.</p> <p><b>Control treatment:</b> Patients following stroke with and without aphasia will be observed and video recorded over two week days and one weekend day pre (n=8) and post (n=8) implementation of a CEE model. Behavioural mapping will record patient interactive and solitary language activity observed within the first minute of 5-minute intervals in 4-hour time periods between 7am and 7pm. <i>Solitary language activities</i> are activities that may promote aphasia recovery such as reading, writing, listening to the radio, and the use of iPad applications. <i>Interactive language activities</i> are activities which are based in communicative interactions that involve an exchange of information with a communication partner involving talking, gesture and/or facial expression, reading, writing or drawing to communicate.</p> |

|                                        |                                                                                                                                                                                                                                                                                                                                                                                                                                                                                                                                                                                                                                                                                                                                                                                                                                                                                                                                                                                                       |
|----------------------------------------|-------------------------------------------------------------------------------------------------------------------------------------------------------------------------------------------------------------------------------------------------------------------------------------------------------------------------------------------------------------------------------------------------------------------------------------------------------------------------------------------------------------------------------------------------------------------------------------------------------------------------------------------------------------------------------------------------------------------------------------------------------------------------------------------------------------------------------------------------------------------------------------------------------------------------------------------------------------------------------------------------------|
| <p><b>Objectives of the Study:</b></p> | <p>This study aims to investigate a CEE model on an acute and rehabilitation ward and if stakeholders perceive a CEE model as valuable by addressing the following research questions:</p> <ul style="list-style-type: none"> <li>- Does a CEE model increase the amount of time PWA and PWOA spend in participating in solitary and interactive language activities on acute and rehabilitation wards during the early post-stroke period?</li> <li>- What are the differences in patients' experience of communication in a CEE model compared to patients' experience of communication in a standard environment on in-patient acute and rehabilitation wards?</li> <li>- What is the experience of implementing a CEE model for staff working with PWA and PWOA within in-patient acute and rehabilitation wards?</li> <li>- Do staffs' perceptions of their knowledge of, skills with, and attitude towards communication and aphasia change following implementation of a CEE model?</li> </ul> |
| <p><b>Number of Centres:</b></p>       | <p>1</p>                                                                                                                                                                                                                                                                                                                                                                                                                                                                                                                                                                                                                                                                                                                                                                                                                                                                                                                                                                                              |
| <p><b>Study duration:</b></p>          | <p>5 years</p>                                                                                                                                                                                                                                                                                                                                                                                                                                                                                                                                                                                                                                                                                                                                                                                                                                                                                                                                                                                        |
| <p><b>Study Hypothesis:</b></p>        | <p>A CEE model will increase patient engagement in solitary and interactive language activities and improve staff and patient experiences of communication compared to a standard ward environment.</p>                                                                                                                                                                                                                                                                                                                                                                                                                                                                                                                                                                                                                                                                                                                                                                                               |
| <p><b>Primary outcomes:</b></p>        | <p>The primary outcome is the change in the proportion of solitary and interactive language activities as a percentage of total observed activity after the implementation of the CEE model.</p> <p>Timepoint: Patient observations completed within 21 days post stroke.</p>                                                                                                                                                                                                                                                                                                                                                                                                                                                                                                                                                                                                                                                                                                                         |
| <p><b>Secondary outcomes:</b></p>      | <p>The differences post CEE model implementation in staff and patient perceptions of the barriers and facilitators to inpatient language activities.</p> <p>Timepoint: Within 18 months of embedding the CEE model.</p>                                                                                                                                                                                                                                                                                                                                                                                                                                                                                                                                                                                                                                                                                                                                                                               |
| <p><b>Study design:</b></p>            | <p>Before-after non-randomised pilot study</p>                                                                                                                                                                                                                                                                                                                                                                                                                                                                                                                                                                                                                                                                                                                                                                                                                                                                                                                                                        |
| <p><b>Key inclusion criteria:</b></p>  | <p>Patients will be eligible for inclusion if they have/are: admitted to the acute or rehabilitation ward for a stroke, less than 21 days post stroke during baseline phase or post-implementation phase, the ability to provide informed consent as determined by the medical team, a Glasgow Coma Scale<sup>1</sup> score greater than 10 at the time of screening, an estimated length of hospital stay greater than 14 days, adequate English proficiency to participate in semi-structured interviews and are above 18 years of age. Patients with aphasia will also have an Aphasia Quotient below 93.7 on the Western Aphasia Battery-Revised.<sup>2</sup></p> <p>Staff participants: One representative from each acute and rehabilitation staff group including medical, nursing, volunteers, and allied health staff members (n=17), who are over 18 years old.</p>                                                                                                                         |
| <p><b>Key exclusion criteria:</b></p>  | <p>Patients will be excluded if they have/are: uncorrected hearing or vision, not medically stable, a documented diagnosis of dementia, traumatic brain injury or previous aphasia, a documented current untreated depression at the time of acute admission or are a participant in another research trial which may affect this study's outcome measures.</p>                                                                                                                                                                                                                                                                                                                                                                                                                                                                                                                                                                                                                                       |
| <p><b>Study Procedures:</b></p>        | <p><b>Baseline phase:</b> Eligible patients during the baseline phase will be observed and video recorded for 4 hours on 3 consecutive days (one weekend and two weekdays) and will complete a semi-structured interview to explore their experiences of communication, and their perceptions of barriers and facilitators to inpatient language activities during their inpatient admission.</p>                                                                                                                                                                                                                                                                                                                                                                                                                                                                                                                                                                                                     |

|                                      |                                                                                                                                                                                                                                                                                                                                                                                                                                                                                                                                                                                                                                                                                                                                                                                                                   |
|--------------------------------------|-------------------------------------------------------------------------------------------------------------------------------------------------------------------------------------------------------------------------------------------------------------------------------------------------------------------------------------------------------------------------------------------------------------------------------------------------------------------------------------------------------------------------------------------------------------------------------------------------------------------------------------------------------------------------------------------------------------------------------------------------------------------------------------------------------------------|
|                                      | <p>Staff will participate in a one-hour focus group to explore their perceptions of barriers and facilitators to inpatient language activities. A focus group interview schedule will be used across all focus groups.</p> <p><b>Implementation phase:</b> The CEE model will be implemented within the acute and rehabilitation wards.</p> <p><b>Post-implementation phase:</b> Intervention group patient observations and interviews, and staff focus groups will replicate baseline data collection.</p>                                                                                                                                                                                                                                                                                                      |
| <b>Safety parameters</b>             | <p>Patients and/or their significant others may experience increased levels of distress during recruitment and/or data collection. This may be the result of adjustment following stroke and/or diagnosis of aphasia and increased awareness of impairment. No other risks known regarding participation in this project. The baseline assessments and interview will be conducted by the Chief Investigator who has experience in supporting patients during this early stage of stroke recovery. If a patient or any significant others becomes upset or distressed, the assessment or interview will be paused with the option to discontinue and counselling strategies will be provided.</p>                                                                                                                 |
| <b>Statistical methods /analysis</b> | <p>Patient demographic and stroke characteristics will be presented using descriptive statistics. One-way ANOVA or the Kruskal-Wallis and chi-square tests will examine differences in characteristics between groups. Time spent observed in interactive and solitary language activities will be expressed as a percentage of total observations. A mixed design ANOVA will be used to calculate the within-subjects variable of presence of aphasia and the between-subjects variable of a CEE on language activity levels of patients by comparing baseline to intervention phase observations. A qualitative description research approach will be used for the qualitative component of this research. The mixed methods design will enable the triangulation of the qualitative and quantitative data.</p> |
| <b>Sample size determination:</b>    | <p>The patient sample size was selected for this pilot study to collect data across each observation period for each patient group in the baseline and intervention phases (see document: Observation_protocol_SD_version 3_23-02-16). The sample size for staff participants was selected to capture a sufficient breadth of professional perspectives.</p>                                                                                                                                                                                                                                                                                                                                                                                                                                                      |

### 3. Introduction

Aphasia is an acquired communication disorder that affects approximately 30% of first ever ischaemic stroke survivors<sup>3</sup> and persists in up to 61% of survivors one-year post stroke.<sup>4</sup> Aphasia impacts all communication modalities with significant negative consequences for social participation, interpersonal relationships, autonomy, capacity to work and quality of life.<sup>5</sup>

Patients following stroke with aphasia (PWA) have been observed to spend less than 28% of their day communicating and 44% of their day alone during their first weeks of inpatient rehabilitation.<sup>6</sup> Inadequate opportunities for communication places PWA at risk of developing maladaptive behaviours such as learned non-use of language.<sup>7</sup>

Environmental Enrichment (EE) refers to conditions which promote physical, cognitive and social activity and has been shown in animal models of stroke to enhance neuroplasticity<sup>8</sup>, promote better learning and memory and contribute to significant improvements in motor function.<sup>9</sup> The human equivalent model<sup>10</sup> in a rehabilitation unit results in patients spending more time engaged in activity and less time sleeping and alone.<sup>11</sup>

### 4. Objectives

Aphasia is a complex language impairment and PWA may need additional support within an Enriched Environment. This pilot study seeks to develop and test an adapted model of an Enriched Environment, a Communication Enhanced Environment (CEE), as a strategy to provide PWA and patients following stroke without aphasia (PWOA) more opportunities to engage in language activities during inpatient rehabilitation. Within this study language activities include both *solitary activities* that may promote aphasia recovery such as reading, writing, listening to the radio, and the use of iPad applications, and *interactive activities* which are based in communicative interactions that involve an exchange of information with a communication partner involving talking, gesture and/or facial expression, reading, writing or drawing to communicate.

#### 4.1 Hypotheses

A CEE will increase patient solitary and interactive language activities and improve staff and patient experiences of communication compared to a standard ward environment.

### 5. Study design

This mixed methods pilot study is a prospective before-after non-randomised controlled design in an acute and a rehabilitation ward of a metropolitan private hospital. The study involves three phases:

- i) *Baseline*: observe and quantify the current ward environment;
- ii) *Implementation* of the CEE model;
- iii) *Post-implementation*: assess the impact of the CEE model.

### 6. Study Population

- i) *Patients*: The baseline group (n=8, 4 PWA, 4 PWOA) recruited within the baseline phase, and the intervention group (n=8, 4 PWA, 4 PWOA) recruited during the post-implementation phase.

- 1 ii) *Staff participants*: One representative from each acute and rehabilitation staff group including medical,  
2 nursing, volunteers, and allied health staff members (n=17), who are over 18 years old.

### 3 **6.1 inclusion and exclusion criteria**

4 Patients will be eligible for inclusion if they have/are: admitted to the acute or rehabilitation ward for a  
5 stroke, less than 21 days post stroke during baseline phase or intervention phase, the ability to provide informed  
6 consent as determined by the medical team, a Glasgow Coma Scale<sup>1</sup> score greater than 10 at the time of screening,  
7 an estimated length of hospital stay greater than 14 days, adequate English proficiency to participate in semi-  
8 structured interviews and are above 18 years of age. Patients with aphasia will also have an Aphasia Quotient below  
9 93.7 on the Western Aphasia Battery-Revised.<sup>2</sup>

10 Patients will be excluded if they have/are: uncorrected hearing or vision, not medically stable, a documented  
11 diagnosis of dementia, traumatic brain injury or previous aphasia, a documented current untreated depression at  
12 the time of acute admission or are a participant in another research trial which may affect any of this study's  
13 outcome measures.

14 Staff and volunteers who are over 18 years old will be eligible to participate in this study.

## 15 **7. Study Assessments and Procedures**

### 16 **Baseline**

17 All recruited patients will complete the Montreal Cognitive Assessment,<sup>11</sup> and The NIH Stroke Scale.<sup>12</sup> PWA  
18 will also complete the Western Aphasia Battery-Revised.<sup>2</sup> Patients' behaviour will be observed and video recorded  
19 for four hours per day on a Sunday, Monday and Tuesday between 7am to 7pm. A behaviour mapping tool  
20 (Appendix A) developed for this study will record patient engagement in language activities in the first minute of  
21 each five-minute interval across each four-hour observation period. Semi-structured interviews will explore patients'  
22 perceptions of barriers and facilitators to inpatient language activities. An interview schedule will be used across all  
23 interviews (Appendix B.). Supportive communication strategies will be used to facilitate PWA participation in  
24 interviews with transcriptions annotated to capture any non-verbal responses.

25 Staff will participate in a one-hour focus group to explore their perceptions of barriers and facilitators to  
26 inpatient language activities. A focus group/interview schedule (Appendix C.) will be used across all focus groups.

### 27 **Implementation**

28 The CEE model will be implemented within the acute and rehabilitation wards.

### 29 **Post implementation**

30 Intervention group patient observations and interviews, and staff focus groups will replicate baseline data  
31 collection.

## 32 **8. Study Treatment**

33 The CEE model incorporates the following strategies to encourage engagement in language activities:

- 34 i) Staff training to facilitate patients' communication and provide opportunities to engage in language  
35 activities;
- 36 ii) Patient access to:

- a) Communication enhancement resources such as iPads and audiobooks;
- b) Communal areas to facilitate engagement amongst patients.

## 9. Participant Completion and Discontinuation

### 9.1 Participant Completion

Participants will have completed the study when they have completed the semi-structured interview.

### 9.2 Participant withdrawal

Participation in this study is voluntary. The participant can withdraw from taking part in the study at any time without giving a reason for withdrawing.

## 10. Data analysis

### 10.1 Primary Analysis

The proportion of observed episodes where PWA and PWOA are engaged in language activities at baseline and post implementation will be analysed using a mixed design ANOVA.

### 10.2 Secondary Analysis

The differences in staff and patient perceptions of the barriers and facilitators to inpatient language activities and communication post CEE implementation will be analysed through a qualitative description approach. Triangulation of the qualitative and quantitative data will be conducted.

## 11. Data management

The data collected will be confidential. No identifying information will be attached to the data and any information that may reveal participant's identity will be removed. The master list of participant names and codes will be kept in a locked filing cabinet at the hospital site which will only be accessible by the research team. All data will be accessed, used and stored in accordance with Commonwealth Privacy Laws. The de-identified data will be stored on a password-controlled computer and/or in a locked cabinet at Edith Cowan University. Electronic data will be backed up on a password controlled hard drive only accessible by the Chief Investigator.

The data collected from this study will have a significant contribution to the aphasia research area and therefore will be stored for 15 years following the completion of this study. Data may be accessed for future studies by the study investigators or higher degrees by research (HDR). In the case of HDR use of the data, the use of the data will be bound by a two-way confidentiality agreement. The data may be used for teaching purposes only with the additional written permission from participants. The data may be made accessible to consumer groups (for example the Australian Aphasia Association) and information may be made available through the National Stroke Foundation and scientific journals. Confidentiality will be maintained in all circumstances. Non-identifiable data will be accessible by researchers through data sharing archives. This data will be governed by an overarching body to ensure data are only used for approved purposes. Researchers who access this data from the data bank will not have access to the participant keys that attach participants to codes therefore data will only be re-identifiable by the Chief Investigator. Data will be deleted from electronic storage and hard copy data will be shredded by the chief



investigator after 15 years completion of the research study (with Ethics Committee approval, Ethics approval numbers: HPH431 and ECU HREC 12149). Non-identifiable data will be added to data archives for data sharing. Researchers who access data archives will not have access to information attaching participants to coded data.

## 12. Study Report

This study will be published in a PhD thesis as part of the Chief Investigator's Higher Research Degree. Outcomes from this study will be published in peer review journals and at conferences.

## 13. Administration Procedures

### 13.1 Ethical Considerations

This research is likely to have a significant impact on aphasia recovery following stroke and will form the basis for future study designs. This study will develop a teaching and learning package that can be used in the future to facilitate and promote increased levels of communication activity during early stroke recovery. The implementation of a CEE may address missed opportunities for language stimulation, harness increased levels of neuroplasticity and optimise aphasia language recovery after stroke. The benefit of a CEE may extend beyond patients with aphasia and may improve health care experience and communication access for all patients following stroke. Additionally, these benefits may extend beyond patients involved in the study as trained staff may use skills and knowledge obtained in the training program to enhance the communication environment of all patients they care for.

### 13.2 Ethical Review Committee

All processes and documentation used within this study will be reviewed and approved by the Edith Cowan University Research Ethics Committee and the site Ethics Committee. The Chief Investigator will complete the annual ethics reports and will be responsible for reporting any adverse events to the Ethics Committees.

### 13.3 Informed Consent

Participants will be excluded if they do not have adequate English proficiency to participate in semi-structured interviews and focus groups. Any participants that require an interpreter will be excluded from inclusion in this study as determined by the medical team.

Patients with aphasia will be provided with aphasia friendly information sheets and consent forms with simple language, bold key words and pictorial support. This will be read and explained by the researcher. Supported conversation strategies will be used to support and facilitate patients with aphasia's involvement and understanding of the research process, informed consent and their rights to withdraw at any time. This will be provided by the Chief Investigator who is a qualified speech pathologist with experience in communicating with patients with aphasia using supported conversation techniques to facilitate and support communication. A detailed information will also be provided to the 'person responsible' for all patients.

### 13.4 Protocol Amendments

All protocol amendments will be reviewed and accepted by the Edith Cowan University Research Ethics Committee and the site research Ethics Committee.



## 14. References

1. Teasdale G, Jennett B. Assessment of coma and impaired consciousness. A practical scale. *Lancet*. 1974;2(7872): 81–4.
2. Kertesz A. *Western Aphasia Battery- Revised*. San Antonio, TX, Harcourt Assessment; 2006.
3. Engelter AT, Gostynski M, Papa S, et al. Epidemiology of aphasia attributable to first ischemic stroke. *Stroke*. 2006 Mar 9;37: 1379-84.
4. Pederson PM, Jørgensen HS, Nakayama H, Raaschou HO, Olsen TS. Aphasia in acute stroke: Incidence, determinants, and recovery. *Annals of Neurology*. 1995 Oct;38(4): 659-66.
5. Kruithof WJ, van Mierlo ML, Visser-Meily JM, van Heugten CM, Post MW. Associations between social support and stroke survivors' health-related quality of life – a systematic review. *Patient Educ Couns*. 2013;93(2): 169–76.
6. Godecke E, Armstrong E, Hersh D, Bernhardt J. Missed Opportunities: Communicative interactions in early stroke recovery. *Stroke Society of Australasia Annual Scientific Meeting*. Hamilton Island, Queensland. 2014.
7. Nithianantharajah J, Hannan AJ. Enriched environments, experience dependent plasticity and disorders of the nervous system. *Nat Rev Neuroscience*. 2006;7(9): 697-709.
8. Janssen H, Bernhardt J, Collier JM, et al. An enriched environment improves sensorimotor function post-ischemic stroke. *Neurorehab Neural Re*, 2010;24(9), 802–813.
9. Janssen H, Ada L, Karayanidis F, et al. Translating the use of an enriched environment poststroke from bench to bedside: study design and protocol used to test the feasibility of environmental enrichment on stroke patients in rehabilitation. *Int J Stroke*. 2012;7: 521–526.
10. Janssen H, Ada L, Bernhardt J, et al. An enriched environment increases activity in stroke patients undergoing rehabilitation in a mixed rehabilitation unit: A pilot non-randomized controlled trial. *Disabil Rehabil*. 2014;36(3), 255–262.
11. Nasreddine ZS, Phillips NA, Bédirian, V, et al. The Montreal Cognitive Assessment, MoCA: A brief screening tool for mild cognitive impairment. *J Am Geriatr Soc*. 2005;53(4); 695-9.
12. NIH stroke scale [Internet]. Bethesda, Md, National Institute of Neurological Disorders and Stroke (U.S.). 2011 [cited 2016 Feb 10]. Available from [https://www.ninds.nih.gov/sites/default/files/NIH\\_Stroke\\_Scale.pdf](https://www.ninds.nih.gov/sites/default/files/NIH_Stroke_Scale.pdf)

Appendix A. Behavioural mapping tool

| Time (5 min): _____                                                                                                                                                                                                                                                            | NO LANGUAGE ACTIVITIES OBSERVED ( <i>describe</i> )                                                                                                             |                                                                                                                                                                                                                                                                                                                                                                                                                                                                                                                                                  |                                                                                                                                                                                                                                                                                                                                                                                                                                                                                                                           | COMMENTS |
|--------------------------------------------------------------------------------------------------------------------------------------------------------------------------------------------------------------------------------------------------------------------------------|-----------------------------------------------------------------------------------------------------------------------------------------------------------------|--------------------------------------------------------------------------------------------------------------------------------------------------------------------------------------------------------------------------------------------------------------------------------------------------------------------------------------------------------------------------------------------------------------------------------------------------------------------------------------------------------------------------------------------------|---------------------------------------------------------------------------------------------------------------------------------------------------------------------------------------------------------------------------------------------------------------------------------------------------------------------------------------------------------------------------------------------------------------------------------------------------------------------------------------------------------------------------|----------|
| Location (select one)                                                                                                                                                                                                                                                          | People present                                                                                                                                                  | INTERACTIVE LANGUAGE ACTIVITIES                                                                                                                                                                                                                                                                                                                                                                                                                                                                                                                  | 'OTHER' FUNCTIONAL LANGUAGE ACTIVITIES                                                                                                                                                                                                                                                                                                                                                                                                                                                                                    |          |
| Amenities<br>Bedroom<br>Hall<br>Therapy area<br>Family Mtg Room<br>Activity room<br><br><b>ON WARD</b><br>Doctor's room<br>Dining room<br>Communal area ( <i>describe</i> )<br><br><b>OFF WARD</b><br>Outside<br>Off-unit ( <i>describe</i> )<br><br>Other ( <i>describe</i> ) | Nurse<br>Personal care assistant<br>Doctor<br>Physio<br>OT<br>SP<br>DT<br>Social worker<br>Family/Friend<br>Other patient<br>Alone<br>Other ( <i>describe</i> ) | In person<br>Telephone<br>Therapy session/ward round<br>Other ( <i>describe</i> )<br><br><b>Patient</b><br>Verbal communication<br>Non-verbal gesture/facial expression ( <i>describe</i> )<br><br>Written aids (writing or reading (circle))<br>Pictorial aids ( <i>describe</i> )<br>Other communication aid ( <i>describe</i> )<br><br><b>Communication partner/s</b><br>Verbal communication<br>Non-verbal gesture/facial expression( <i>describe</i> )<br><br>Written aids<br>Pictorial aids<br>Other communication aid ( <i>describe</i> ) | Typing/writing<br>Reading ( <i>describe</i> )<br><br>Texting (mobile phone)<br>Listening to radio/music<br>Watching TV<br>Internet use ( <i>describe</i> )<br><br>Word games with a partner<br>Other ( <i>describe</i> )<br><br><b>NON-FUNCTIONAL/ NON-PROPOSITIONAL LANGUAGE ACTIVITIES</b><br>Singing<br>Word games (alone)<br>Language apps (alone)<br>Copying written letters, words, sentences (alone).<br><br><b>OTHER</b><br>Talking to observer<br>Talking to self: appropriate/inappropriate ( <i>describe</i> ) |          |
| Time (5 min): _____                                                                                                                                                                                                                                                            | NO LANGUAGE ACTIVITIES OBSERVED ( <i>describe</i> )                                                                                                             |                                                                                                                                                                                                                                                                                                                                                                                                                                                                                                                                                  |                                                                                                                                                                                                                                                                                                                                                                                                                                                                                                                           | COMMENTS |
| Location (select one)                                                                                                                                                                                                                                                          | People present                                                                                                                                                  | INTERACTIVE LANGUAGE ACTIVITIES                                                                                                                                                                                                                                                                                                                                                                                                                                                                                                                  | 'OTHER' FUNCTIONAL LANGUAGE ACTIVITIES                                                                                                                                                                                                                                                                                                                                                                                                                                                                                    |          |
| Amenities<br>Bedroom<br>Hall<br>Therapy area<br>Family Mtg Room<br>Activity room<br><br><b>ON WARD</b><br>Doctor's room<br>Dining room<br>Communal area ( <i>describe</i> )<br><br><b>OFF WARD</b><br>Outside<br>Off-unit ( <i>describe</i> )<br><br>Other ( <i>describe</i> ) | Nurse<br>Personal care assistant<br>Doctor<br>Physio<br>OT<br>SP<br>DT<br>Social worker<br>Family/Friend<br>Other patient<br>Alone<br>Other ( <i>describe</i> ) | In person<br>Telephone<br>Therapy session/ward round<br>Other ( <i>describe</i> )<br><br><b>Patient</b><br>Verbal communication<br>Non-verbal gesture/facial expression ( <i>describe</i> )<br><br>Written aids (writing or reading (circle))<br>Pictorial aids ( <i>describe</i> )<br>Other communication aid ( <i>describe</i> )<br><br><b>Communication partner/s</b><br>Verbal communication<br>Non-verbal gesture/facial expression( <i>describe</i> )<br><br>Written aids<br>Pictorial aids<br>Other communication aid ( <i>describe</i> ) | Typing/writing<br>Reading ( <i>describe</i> )<br><br>Texting (mobile phone)<br>Listening to radio/music<br>Watching TV<br>Internet use ( <i>describe</i> )<br><br>Word games with a partner<br>Other ( <i>describe</i> )<br><br><b>NON-FUNCTIONAL/ NON-PROPOSITIONAL LANGUAGE ACTIVITIES</b><br>Singing<br>Word games (alone)<br>Language apps (alone)<br>Copying written letters, words, sentences (alone).<br><br><b>OTHER</b><br>Talking to observer<br>Talking to self: appropriate/inappropriate ( <i>describe</i> ) |          |

## Appendix B. Patient interview guide

**Investigating Communication Enhanced Environments after stroke****Patient Interview guide, version 1\_11-8-15**

Tell me about what kind of activities you do while you are here (in hospital).

Describe your experience of communicating with people on the ward.

What makes it easier to communicate with people on the ward?

What makes it hard to communicate with people on the ward?

What can we do to make communicating with people easier?

For peer review only

Appendix C. Staff focus group guide.

**Investigating Communication Enhanced Environments after stroke**  
**Staff focus group guide, version 1\_27-7-15**

STAFF FOCUS GROUP GUIDE BASELINE PHASE

What kind of language activities or language tasks do stroke patients currently participate in on the ward?

What kind of language activities or language tasks would you like see stroke patients have access to on the wards?

Describe your experience of communicating with stroke patients at the moment.

Can you tell me about anything that facilitates your ability to communicate with stroke patients on the ward?

Can you tell me about any barriers you experience that impact your ability to communicate with stroke patients on the ward?

What changes would you like to see to enhance communication between staff and stroke patients on the ward?

What changes would you like to see to enhance communication between visitors and stroke patients on the ward?

How could we enhance or optimise communication and language tasks and activities for stroke patients on the ward?

What do you think a communication and language enhanced stroke ward environment might look like?

STAFF FOCUS GROUP GUIDE POST-IMPLEMENTATION PHASE

Describe your experience of communicating with stroke patients at the moment.

Can you tell me about any barriers you experience that impact your ability to communicate with stroke patients on the ward?

Describe the differences in the communication environment since implementing the model.

What changes did you see to enhance communication between staff and stroke patients on the ward?

What changes did you see to enhance communication between visitors and stroke patients on the ward?

What was it like to use the model?

How do you feel about the model?

Can you tell me about anything that helped you use the model with stroke patients on the ward?

Can you tell me about any barriers you experienced while implementing the model?

How can we improve the model?

## Communication Enhanced Environments after Stroke

### Study procedure version 2\_23-02-16

#### BASELINE:

*Staff recruitment:* The Chief Investigator will recruit staff participants through a verbal explanation of the study and the provision of the information sheets and written consent forms. Staff will be provided 48 hours to discuss the study and ask questions before consenting to participate. Staff interviews and focus groups will commence as staff participants are recruited. Staff will participate in a one-hour focus group or a one-hour semi-structured interview (in person or via telephone) to explore staff perceptions of environmental barriers and facilitators to language activity and communication on in-patient acute and rehabilitation wards.

*Patient recruitment:* All consecutively admitted patients following stroke during the baseline period will be screened for eligibility to participate in the study. The hospital site investigators will identify potential stroke participants that meet the inclusion and exclusion criteria. Stroke participants with aphasia will be identified by the hospital speech pathology or medical team as having a diagnosis of aphasia (aphasia diagnosis will be confirmed via Western Aphasia Battery-Revised (WAB-R)<sup>1</sup> Aphasia Quotient score <93.7 during data collection). The site investigators will approach potential participants and gain verbal consent from the patient to be approached by a member of the research team and have their 3-point identification released to the research team. This will be documented in the patient's integrated medical progress notes. Once verbal consent has been gained and documented, the site investigators will email the Chief Investigator the patient alert proforma identifying the patient as meeting the inclusion/exclusion criteria. The research team will liaise with the medical team to confirm the potential stroke participant meets the inclusion criteria: (i) admitted to the in-patient rehabilitation stroke unit for recent stroke, (ii) are less than 21 days post stroke and during baseline phase or intervention phase, (iii) have the ability to provide informed consent as determined by the medical team iv) Glasgow Coma Scale<sup>2</sup> greater than 10 at the time of screening, (v) have an estimated length of stay greater than 14 days and (vi) have adequate English proficiency to participate in semi-structured interviews. Patients will be excluded if they (i) have uncorrected hearing or vision (for example hearing impairment without hearing aids, vision impairment without glasses), (ii) are not medically stable, (iii) have a documented diagnosis of major depression or (iv) have a documented history of dementia or significant cognitive decline, traumatic brain injury or previous aphasia at the time of admission for the acute event, (v) or are a participant in a research study that will influence this study's outcomes. Stroke participant recruitment will follow the stroke participant consent procedure (see document: SD\_Communication Enhanced Environments after Stroke consent procedure version 1\_3-2-15). A record of identifying participant details attached to patient codes will be kept at the hospital site in a locked filing cabinet. An email summary of the baseline assessment results will be sent to the hospital speech pathology generic email address. The patient will be identified by patient code and ward/room number. The hospital speech pathology team will write a summary of the assessment results in the patient's integrated medical progress notes.

**Patient data collection:** All recruited stroke participants will complete the NIH Stroke Scale<sup>3</sup> (by someone trained in using this tool) and the Montreal Cognitive Assessment (MoCA).<sup>4</sup> Participants with aphasia will also complete an assessment of aphasia, the WAB-R<sup>1</sup> and provide a personal narrative language sample on their reason for admission to confirm a diagnosis of aphasia. After patient recruitment has been completed, the Chief Investigator and/or trained medical team members will recruit the patient's family, friends and significant others to consent to video recording and observations of their interactions with stroke participants.

Observations of stroke participants will commence 1-3 days after obtaining written consent. Patients' behaviour will be observed by the Chief Investigator or a Research Assistant, and video recorded for a total of 12 hours to enable behaviour mapping of video data (see document: Observation\_protocol\_SD\_version 3\_23-02-16). Patients will be observed and video recorded for 4 hours per day on weekend day and two consecutive weekdays between 7am to 7pm. The observation periods will be grouped into 4-hour observation intervals (e.g. 7am-11am, 11am-3pm and 3pm-7pm). Each day the patient will be observed and video recorded for one observation interval. The participant will be observed and video recorded during a different observation interval each day to gain a general insight into the patients' activities (see Figure 1. below). Patients who do not consent to video recording will be provided with the option of audio recording and manual observation conducted by the researcher to enable the collection of case notes regarding patient behaviour. An observational protocol developed for this study will be used to measure the frequency stroke participants engage in language activities. These will be categorised into *solitary language activities* for example reading, writing, listening to the radio, use of iPad applications, and *interactive language activities* defined as i) an interaction involving an exchange of information, ii) with a communication partner including gesture and/or facial expression, reading, writing or drawing for the purpose of communication and use of technology including talking on the telephone. The observational protocol will be based on the behavioural mapping techniques of Janssen et al.<sup>5</sup> Patients' solitary and interactive language activities will be recorded in 5-minute intervals and activity observed within the first minute of the observation interval will be recorded on a checklist of the predetermined behaviours. Semi-structured supported conversation interviews for stroke participants will be conducted within 5 days of the last observation. The interviews will explore patients' perceptions of environmental barriers and facilitators to language activities and communication and their experience of communication on the acute and rehabilitation wards.

#### IMPLEMENTATION:

A model of a CEE will be implemented within the acute and rehabilitation wards. The model will be developed as part of the research project. We hypothesise that our model of CEE will include the provision of:

- i) CEE equipment, for example reading materials such as books and magazines, access to a computer with internet and access to a communal dining area,
- ii) CEE education, support and training for staff, patients and their family, friends and significant others with the aim to develop the ability to support and facilitate 'language activity' and 'communication activity' for patients after stroke. This will be accessible via multiple modalities including one-on-one training and group training sessions, as

well as through the provision of video and written resources. A questionnaire will be administered pre and post training in order to determine staffs’ perceptions of changes in their knowledge, skills and attitude towards communication and aphasia. Additionally, feedback regarding the content and format of the training program will be obtained through questionnaires administered after the completion of the training program. Training and support provided in the implementation phase will be continued until the end of the intervention phase.

**POST-IMPLEMENTATION:**

Staff participant semi-structured interviews and focus groups will be conducted. Staff will participate in a one-hour semi-structured interview or a one-hour focus group to explore staff perceptions of environmental barriers and facilitators to language activities and communication.

The procedures for participant recruitment and data collection during the post-implementation phase will replicate those used in the baseline phase.

There is no travel commitment for all participants as all data collection and training will be conducted at the hospital.

| Observation interval | Observation time | Day 1: Sunday | Day 2: Monday | Day 3: Tuesday |
|----------------------|------------------|---------------|---------------|----------------|
| 1                    | 7am-8am          | PWA1<br>PWOA1 | PWA3<br>PWOA3 | PWA2<br>PWOA2  |
|                      | 8am-9am          |               |               |                |
|                      | 9am-10am         |               |               |                |
|                      | 10am-11am        |               |               |                |
| 2                    | 11am-12pm        | PWA2<br>PWOA2 | PWA1<br>PWOA1 | PWOA<br>PWOA3  |
|                      | 12pm-1pm         |               |               |                |
|                      | 1pm-2pm          |               |               |                |
|                      | 2pm-3pm          |               |               |                |
| 3                    | 3pm-4pm          | PWA3<br>PWOA3 | PWA2<br>PWOA2 | PWA1<br>PWOA1  |
|                      | 4pm-5pm          |               |               |                |
|                      | 5pm-6pm          |               |               |                |
|                      | 6pm-7pm          |               |               |                |

Figure 1. CEE Observation schedule



Figure 2. Study flow diagram



## References

1. Kertesz A. Western Aphasia Battery- Revised. San Antonio, TX, Harcourt Assessment; 2006.
2. Teasdale G, Jennett B. Assessment of coma and impaired consciousness. A practical scale. *Lancet*. 1974;2(7872): 81–4.
3. NIH stroke scale [Internet]. Bethesda, Md, National Institute of Neurological Disorders and Stroke (U.S.). 2011 [cited 2016 Feb 10]. Available from [https://www.ninds.nih.gov/sites/default/files/NIH\\_Stroke\\_Scale.pdf](https://www.ninds.nih.gov/sites/default/files/NIH_Stroke_Scale.pdf)
4. Nasreddine ZS, Phillips NA, Bédirian V, et al. The Montreal Cognitive Assessment, MoCA: A brief screening tool for mild cognitive impairment. *J Am Geriatr Soc*. 2005;53(4); 695-9.
5. Janssen H, Ada L, Bernhardt J, et al. An enriched environment increases activity in stroke patients undergoing rehabilitation in a mixed rehabilitation unit: A pilot non-randomized controlled trial. *Disabil Rehab*, 2014; 36(3), 255–262. doi: 10.3109/09638288.2013.788218

## Communication Enhanced Environments after Stroke consent procedure

### Version 1\_3-2-15

#### Stroke participants

The following consenting procedure will be used for all participants who are identified as potential research participants. Recruitment will only be completed by the Chief Investigator.

1. Check the stroke participant meets the inclusion criteria and exclusion criteria.
2. Read the participant information sheet to the participant. Use the pictures on the participant consent form to support the patient's comprehension of verbal information. Use gesture, written and pictorial support to facilitate verbal communication as required.
3. Provide the person responsible with the person responsible information sheet and consent form.
4. Provide time for the patient and the person responsible to discuss the study and ask questions to their satisfaction.
5. Ask the stroke participant if they consent to the study using simple closed questions (e.g. "Do you understand what the study is about?", "Do you have any questions about the study?", "Do you want to be in the study?", "Will you sign the form?"). Use multi-modal communication strategies and repeat information/questions as required. Use the pictures on the participant consent form to support patient comprehension of verbal information.
6. If the stroke patient agrees to participate in the study, ensure they sign the consent form witnessed by someone independent of the study.
7. Provide the stroke participant with a copy of the information sheet and consent form for their own records.
8. Add the participant study number to the consent form
9. Store the signed consent forms in a locked cabinet at the hospital site. This cabinet will only be accessible by the research investigators.

## Investigating Communication Enhanced Environments after stroke

### Observation Protocol version 3\_ 23-2-16

During the baseline and intervention period, patients' behaviour will be observed and video recorded for a total of 12 hours. Patients who do not consent to video recording will be provided with the option of audio recording and manual observation. This will enable the collection of relevant notes about factors that might influence the interactions that may not be captured in the video or behavioural mapping, for example the context of the interactions or details about the environment.

Patients will be manually observed and video recorded for four hours per day on two weekdays and one weekend day between 7am to 7pm. The observations will be grouped into three x 4-hour observation intervals (e.g. 7am-11am, 11am-3pm, 3pm-7pm). Each day the patient will be observed and video recorded for one of the 4-hour observation intervals. The 4-hour observation period will be split into 5-minute intervals. All language and communication activity observed within the first minute of the 5-minute interval will be recorded on the behavioural mapping sheet with predetermined behaviours (Appendix 1). The free smart phone app 'Impetus' can be used to time 1-minute observations. You can set the timer to vibrate briefly when the 1-minute observation interval begins and ends.

Observation times (see Figure 1.) will be randomly selected by drawing out of an envelope. This will be conducted by the primary investigator prior to commencing patient observations. It may not be possible to observe the patient during the planned observation time, for example as a result of scheduled testing or home visits. If this occurs, patients can be observed during the next available observation interval. Changing or modifying the observation schedule should be avoided where possible.

| Observation interval | Observation time | Day 1: Sunday | Day 2: Monday | Day 3: Tuesday |
|----------------------|------------------|---------------|---------------|----------------|
| 1                    | 7am-8am          | *PWA1         | PWA3          | PWA2           |
|                      | 8am-9am          | **PWOA1       | PWOA3         | PWOA2          |
|                      | 9am-10am         |               |               |                |
|                      | 10am-11am        |               |               |                |
| 2                    | 11am-12pm        | PWA2          | PWA1          | PWA3           |
|                      | 12pm-1pm         | PWOA2         | PWOA1         | PWOA3          |
|                      | 1pm-2pm          |               |               |                |
|                      | 2pm-3pm          |               |               |                |
| 3                    | 3pm-4pm          | PWA3          | PWA2          | PWA1           |
|                      | 4pm-5pm          | PWOA3         | PWOA2         | PWOA1          |
|                      | 5pm-6pm          |               |               |                |
|                      | 6pm-7pm          |               |               |                |

Figure 1. Observation schedule

\*PWA: patient with aphasia

\*\*PWOA: patient without aphasia

## DISCOURSE SAMPLE

You must collect a personal narrative discourse sample for each participant at the beginning of the first observation. Once you have set up the video camera and have started recording, ask the patient “what has brought you into hospital?”. Once the patient has finished telling you their personal narrative, tell the patient you will now start the observations.

## VIDEO RECORDING SET-UP

Place the video camera facing the patient approximately 1-2 metres away from them. Ensure the camera is placed in an area where it is unlikely to be moved for the duration of the observation time (for example at the end of the patient’s bed). Ensure the camera frame is capturing the patient as well as their surroundings (e.g. potential communication partners, visitors, etc). If the patient relocates, reposition the camera to ensure the patient and their surroundings remain in frame. Observe and manually record the patient’s behaviour and their environment according to the procedure for behavioural mapping.

Do not record the patient in the bathroom or shower or during any other inappropriate circumstances (this may include sensitive conversations, culturally sensitive situations or if the patient requests). If the patient indicates that they don’t want to be recorded or becomes agitated, upset or distressed, use the ‘withdrawal from observations visual resource’ (if appropriate) and ask the patient:

1. Do they want you to stop video recording?
2. Do they want to be manually observed and audio recorded instead?  
If the patient responds ‘no’, ask the patient-
3. Can you come back another time to observe them?

If the patient asks you to stop recording you must cease recording immediately. The patient may allow you to continue with manual observations or come back another time to complete the observations. If the patient allows you to complete manual observations and audio recording, follow the audio-recording set-up and protocol below.

## AUDIO RECORDING SET-UP AND PROTOCOL

This protocol is to be followed if the patient or their family indicate they do not want to be video recorded however agree to audio recording and manual observations. Place the cap on the video camera and continue recording in order to capture audio. If using a battery-operated audio recorder, place it on a table close to the patient (within 1 metre). Ensure the audio recorder is placed in a location where it will not be touched or moved throughout the

1 observation time. Observe and manually record the patient's behaviour and their environment according to the  
2 procedure for behavioural mapping. Ensure spare batteries for the audio recorder are available if required.  
3  
4  
5

## 6 **COMMUNICATION PARTNERS AND VISITORS**

7  
8 Take note of all communication partners and visitors who have provided consent to video recording and/or  
9 observations of their patient interactions. If someone enters the room during recording politely interrupt the  
10 interaction, introduce yourself and inform the person that the patient is being video recorder recorded as a part of  
11 the study the patient has agreed to participate in. Ask the visitor if they would like to go out of the room with the  
12 researcher to find out about the study and the video recording. Provide a verbal explanation of the study and  
13 provide the 'Visitors/communication partners' information and consent form'. Offer the visitor the option of no  
14 video or manual recoding during their interaction with the patient. If the person chooses not to participate in  
15 manual or video observations inform the person that any incidental recordings of them will be deleted and will not  
16 be included in the study. The researcher will step out of the room for the duration of their visit.  
17  
18  
19  
20  
21  
22  
23  
24  
25

## 26 **PROCEDURE FOR BEHAVIOURAL MAPPING**

- 27 • Position self where the patient can be clearly observed
- 28 • Remain inconspicuous as possible
- 29 • Circle ALL appropriate components on the observation schedule in regards to location, activity, people  
30 present and details of language and communication observed within the first minute of each five-minute  
31 interval.
- 32 • You can circle more than one key per section if required (except for location).
- 33 • If you require a toilet break, leave the camera recording while you take a break. If you miss a 1-minute  
34 observation, place a line through the observation interval on the behavioural mapping sheet and write  
35 'unobserved-toilet break'.  
36  
37  
38  
39  
40  
41  
42  
43  
44  
45

## 46 **TIME**

- 47 • Write the time at the beginning of the 1-minute observation interval

## 48 **LOCATION**

- 49 • Circle only one location
- 50 • If the patient is moving between two locations, circle the location the patient is moving towards

51 AMENITIES: Toilet, shower.

52 BEDROOM: Around the patient's room or bed. If the patient is outside of their doorway this is considered 'hall'.  
53  
54  
55  
56  
57  
58  
59  
60

1 HALL: Any hallway within the hospital ward.

2 THERAPY AREA: In an allied health therapy session, including occupational therapy, physiotherapy, speech  
3 pathology, nursing.

4 FAMILY MEETING ROOM: Family meeting room.

5 DOCTOR'S ROOM: Doctor's office.

6 DINING ROOM: Dining room during meal times or any other time.

7 COMMUNAL AREA: Communal dining area.

8 OUTSIDE: Outside areas including the garden, car park.

9 OFF UNIT: Off-site locations, home visits, testing off site.

10 OTHER: Anything that doesn't fit into the above categories-provide description of location.

## 11 PEOPLE PRESENT

12 People present include any person that is near the patient and is able to have an interaction with the patient. If you  
13 do not know how to classify the person make a note to check with staff at a later time and complete the observation  
14 schedule.

15 **Exceptions:** People who are near the patient but are unable to interact with the patient, e.g. cognitive or behavioural  
16 issues, barriers between person and the patient preventing them from interacting- e.g. curtain drawn, people in the  
17 way. If an interaction is occurring despite objects in the way, the communication partner is considered as a 'person  
18 present'.

19 PEOPLE PRESENT: Nurse, nurse assistant, doctor, physio (physiotherapist), OT (occupational therapist), SP (speech  
20 pathologist), DT (dietician), SW (social worker), family/friend, other patient, alone (no-one present that is conducive  
21 to interactions), other (describe).

## 22 ACTIVITIES

23 UNOBSERVED: If you are unable to observe the patient. Place a line through the observation  
24 interval and write unobserved.

25 NO LANGUAGE ACTIVITY: If the patient is observed not engaged in any communication activity.

- 26 • Circle 'no activity' on the checklist
- 27 • Write what the patient is doing, e.g. 'sleeping'

28 INTERACTIVE LANGUAGE ACTIVITIES: Defined as an interaction involving an immediate communicative exchange  
29 with a communication partner. Interactive language activities may include talking, gesture and/or facial expression,  
30 reading, writing or drawing for the purpose of communication, use of communication aids or AAC devices and use of  
31 technology including talking on the telephone. Non-verbal gesture or facial expression includes eye contact to

1 initiate interactions, hand gestures (e.g. waving, thumbs up), body movements for the purpose of conveying a  
2 communicative message (e.g. shrugging) and/or facial expressions for the purpose of communication.

3 Communication aids or AAC devices includes any use of alternative and augmentative devices for the purpose of  
4 communication, e.g. high-tech or low-tech AAC devices such as letter boards, pictures/photos, whiteboard, writing  
5 or drawing, smart phones, iPad. Please describe communication aids observed.  
6  
7

8  
9 OTHER FUNCTIONAL COMMUNICATION ACTIVITIES: All other communication activities that do not involve a direct  
10 immediate communicative exchange with a communication partner. Functional communication activity may include  
11 reading, typing/writing, emailing, internet use, watching TV, listening to talking on the radio. Note the patient must  
12 be looking directly at the TV to be considered 'watching TV'. If the TV is on in the background, do not include this as  
13 'watching TV'.  
14  
15

16  
17 NON-FUNCTIONAL/NON-PROPOSITIONAL LANGUAGE ACTIVITIES: Singing, word games (carried out alone), language  
18 apps (used alone), copying written letters, words or sentences (carried out alone).  
19  
20

21 OTHER: Communication or language activities that do not fit the criteria of interactive language activity, 'other'  
22 functional communication activities, non-functional/non-propositional language activities or may be a confounding  
23 variable (for example, talking to self and talking to the observer). If a patient is talking to themselves, note if this is  
24 appropriate (for example, saying 'excuse me' after burping) or inappropriate (for example, an extensive monologue)  
25 and describe the context. If the patient's verbal output is inaudible, write this in the space underneath 'talking to  
26 self'.  
27  
28  
29  
30  
31

32 **Note:** If the patient is using a computer, phone, smart device, or iPad where the activity they are engaged in (e.g.  
33 texting, emailing, playing a game, etc) cannot be accurately determined, note this in the comments section. After the  
34 1-minute observation interval has been completed ask the patient if they mind sharing if what activity they were  
35 completing on their device and record this in the relevant section. If the patient does not wish to share this  
36 information with you, record this in the 'other' section.  
37  
38  
39  
40

#### 41 COMMENTS

42 Describe the context of the interactions or details about the environment in the comments section. This will provide  
43 information regarding factors that may influence the interactions, for example 'background noise'. Additionally,  
44 write down any information that may be missed in the video data, for example, people out of the camera frame,  
45 interactions that may be overheard in the room that might impact on the current interactions.  
46  
47  
48  
49

50 Draw a line under the final comment after the one-minute observation had been completed. Write any additional  
51 observations within the final 4 minutes below this line (see example).  
52  
53  
54  
55

56 If you have any queries or questions regarding this observation protocol or the observation protocol please contact  
57 chief investigator Sarah D'Souza.  
58  
59  
60

# Stroke participant information and consent form

## Communication activity in hospital

This research project is being undertaken as **part of the requirements** of a **PhD at Edith Cowan University**.

### Researchers' contact details

| <b>Edith Cowan University</b>                                                                   |                                        |                  |
|-------------------------------------------------------------------------------------------------|----------------------------------------|------------------|
| <b>Chief Investigator/</b><br>PhD student                                                       | <b>Sarah D'Souza</b>                   | Ph: 0439 982 451 |
| Principal Supervisor                                                                            | Professor Beth<br>Armstrong            | Ph: 08 6304 2769 |
| Co-Supervisor                                                                                   | Associate Professor<br>Natalie Ciccone | Ph: 08 6304 2047 |
| Co-Supervisor                                                                                   | Associate Professor<br>Erin Godecke    | Ph: 08 6304 5901 |
| Co-Supervisor                                                                                   | Associate Professor<br>Deborah Hersh   | Ph: 08 6304 2563 |
| <b>Hunter Stroke Service, University of Newcastle and Hunter<br/>Medical Research Institute</b> |                                        |                  |
| Adjunct Supervisor                                                                              | Dr Heidi Janssen                       | Ph: 02 40420417  |



1 You are **invited** to participate in a research project. Sarah D'Souza, a  
2 speech pathologist and PhD student is leading the study as Chief  
3 Investigator. This study has received ethical **approval** from **ECU** Human  
4 Research **Ethics Committee** and the Hollywood Private Hospital  
5 Research Ethics Committee.  
6  
7  
8  
9

10  
11  
12  
13  
14 This project is investigating the **hospital environment** to see how this  
15 **influences** patient **communication activity**. Communication activity  
16 involves communication, such as **talking** with other patients,  
17 **socialising**, **reading** the paper, using the **telephone**, talking to staff, or  
18 engaging in group activities including **therapy**.  
19  
20  
21  
22  
23  
24

25  
26  
27 **You** have been **selected** to participate as you have had a **stroke** and  
28 are receiving **treatment at Hollywood Private Hospital**. We are  
29 **interested** in seeing **how** the hospital **surroundings affect what you**  
30 **do** throughout the day.  
31  
32  
33  
34  
35  
36  
37

### 38 **What would you have to do?**

39  
40 You will be **asked** to provide **consent** to **agree to participate** in the  
41 study.  
42  
43  
44

45 You will be **asked to consent** to:  
46  
47  
48  
49  
50

- 51 • Complete **three tests** to see how your stroke has affected **you**  
52 including your **language, concentration** and **memory**. These tests  
53 will be conducted at the **beginning of the project**. The tests will take  
54 approximately **1 hour** to complete with an option to complete the tests  
55  
56  
57  
58  
59  
60

1 over **two separate 30 minute sessions** and with as many **breaks** as  
2 you may need.  
3  
4  
5  
6

- 7
- 8 • A **researcher** spending approximately **1 hour discussing with you**  
9 your **opinion** regarding **how** your rehabilitation **surroundings affect**  
10 **your stay in hospital** and **your communication activity** levels.  
11  
12
  - 13 • A researcher **video recording, observing** and **writing down** what is  
14 happening in your **environment** including **your activities**. You will be  
15 observed and recorded for a total of **12 hours** over **3 days**.  
16  
17

18  
19  
20  
21  
22  
23  
24  
25  
26 You may **not want** to be **video recorded**. If you **request**, you will  
27 **not** be **video recorded**. You can ask not to be video recorded at **any**  
28 **time**. In this case the researcher will **only observe, audio record**  
29 and **write down** what is **happening in your** environment **including**  
30 your activities.  
31  
32  
33  
34  
35  
36  
37  
38  
39

- 40
- 41 • A researcher **looking at your hospital medical file** to collect  
42 **information** regarding:  
43
    - 44 • Your **details** (such as your age, your living arrangements, your  
45 occupation and your level of functioning before your stroke)
    - 46 • Any **conditions** or **diseases** you may have
    - 47 • Information about your **stroke** (for example when it happened, the  
48 **area** of the **brain** affected, how it has **affected your functioning**  
49 and **abilities**)
    - 50 • Details about **how long** you have **been in hospital** since your  
51 stroke  
52  
53  
54  
55  
56  
57  
58  
59  
60

1  
2  
3 If you decide to participate in this study, you **will not miss out** on any  
4 **treatment**. Participation will **not cost** you **anything** and **after**  
5  
6  
7 completing the **tests** and the **interview** you will be asked to continue  
8  
9 participating in your **normal activities**.  
10

11  
12  
13  
14  
15 We will **not record** if you are **behind closed curtains** or completing  
16  
17 sensitive tasks such as when you are in the **toilet** or **shower**.  
18  
19

20  
21  
22  
23 We may use the **recordings** of **you** to make a **training package**  
24  
25 (including a video). You can have **your face blurred out** if you want. If  
26  
27 you **do not want** to be in the training package we will **not include you**  
28  
29 in the training package or video.  
30

31  
32  
33  
34  
35 Your hospital **discharge** will **not be affected** because you are in this  
36  
37 study. **You** will be **discharged** from hospital when the hospital **medical**  
38  
39 **team decides** that you are **ready**.  
40

41  
42  
43  
44 There are **no known risks** of participating in this study. If you feel  
45  
46 uncomfortable at any time, you are free to **tell the researcher** and  
47  
48 **observations** within your room will **stop immediately**. You may  
49  
50 become **upset** during the **tests** or the **interview**. If this happens you  
51  
52 can **ask** to take a **break or stop** the interview.  
53  
54

55  
56  
57 There will be **no immediate benefit** to you from participating in this  
58  
59 research; however your participation will allow the collection of  
60

1 information that may **help improve** stroke **hospital wards** which may  
2 **benefit** future stroke survivors.  
3  
4  
5

6 **Participating** in this study is completely **voluntary**. You **do not have**  
7 **to** participate if you don't want to. If you decide to participate you may  
8 **withdraw** at **any time** without giving a reason and withdrawing **will not**  
9 **disadvantage** you in any way and will **not affect** your hospital  
10 **treatment**. If you **decide** that you do **not want to participate** in the  
11 study, you **can ask to remove** all of your **information** from the study.  
12  
13  
14  
15  
16  
17  
18  
19  
20  
21

22 All the **information** you give will be **confidential**. You will **not be**  
23 **identified** by name. You will be **assigned** a unique **code** and any  
24 information that may reveal your **identity** will be **removed**.  
25  
26  
27  
28

29 All personal health information will be accessed, used and stored in  
30 accordance with Commonwealth Privacy Laws. **Information** from all the  
31 people in the study is **combined** and **summarised**.  
32  
33  
34  
35  
36  
37  
38

39 We will **store** all your electronic **information** on a **password locked**  
40 **computer** and **password locked hard drive only accessible by the**  
41 **Chief Investigator**. Your hard copy information will be **kept** in a **locked**  
42 **cabinet** at Edith Cowan University. Your information will **only** be  
43 **accessible to researchers** named on **this study**.  
44  
45  
46  
47  
48  
49  
50  
51  
52

53 The **results** of this study may be **published** in research **journals** or  
54 presented at **conferences**. Your **name** will **not** be **used**.  
55  
56  
57  
58  
59  
60

1 **Data** may be **used** in higher degree by **research studies** in the **future**.  
2 **Confidentiality** will be **maintained** and no identifying information will  
3 be used.  
4  
5  
6  
7  
8  
9

10 **Data** will be **accessible by researchers** through data sharing archives.  
11 This data will be governed by an overarching body to ensure data is **only**  
12 **used for approved research** purposes. Researchers who access this  
13 data from the data bank will not have access to participant information  
14 and therefore **will not know your identity**.  
15  
16  
17  
18  
19  
20  
21  
22  
23

24 **Read** this information and be sure you **understand** its content **before**  
25 you **agree** to participate in this study.  
26  
27  
28  
29  
30  
31

32 If **you** would **like** to **participate** in this study, please **sign the form**  
33 below and **return** it to a **staff** member or a member of the **research**  
34 **team**.  
35  
36  
37  
38  
39  
40

### 41 **Questions or further information?**

42 You **may wish** to **discuss** this information with your **doctor, a relative**  
43 **or friend before agreeing** to take part in this study.  
44  
45  
46  
47  
48  
49

50 If you are interested in participating, please tell the researchers. If you  
51 have any questions or require any further information about the research  
52 project, please contact: Sarah D'Souza [Ph: 0439 982 451].  
53  
54  
55  
56  
57  
58  
59  
60

1 Thank you for considering the invitation to take part in this research  
2 project.  
3  
4  
5  
6

7 Yours sincerely,  
8  
9

10  
11  
12 Sarah D'Souza  
13  
14  
15  
16  
17

18 If you have any **concerns or complaints** about the research project and wish to **talk to an**  
19 **independent person**, you may contact:  
20  
21

22 **Kim Gifkins**  
23

24 **Senior Research Ethics Advisor**  
25

26 Edith Cowan University  
27

28 270 Joondalup Drive  
29

30 JOONDALUP WA 6027  
31

32 Phone: **(08) 6304 2170**  
33

34 Email: research.ethics@ecu.edu.au  
35  
36  
37  
38  
39  
40

41 This project has been approved by the ECU Human Research Ethics Committee and the  
42 Hollywood Private Hospital Research Ethics Committee.  
43  
44  
45  
46  
47  
48  
49  
50  
51  
52  
53  
54  
55  
56  
57  
58  
59  
60

1 **You** have been **asked to participate** in a **research** study.  
2  
3  
4  
5



30 A researcher will **record you** with a **tape recorder** or a video **camera**,  
31 **watch** and **write down** what is happening in your **environment**  
32 including **your activities**.  
33  
34  
35  
36  
37  
38  
39  
40  
41  
42  
43  
44  
45  
46  
47  
48  
49  
50  
51  
52  
53  
54  
55  
56  
57  
58  
59  
60

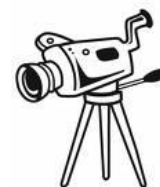

1 A **researcher** will **discuss** with you **your opinion** regarding **how** your  
2 hospital **surroundings** affect **your stay in hospital** and **your**  
3 **communication activity levels**.  
4  
5  
6  
7  
8  
9



10  
11  
12  
13  
14  
15  
16  
17  
18  
19  
20  
21  
22  
23  
24  
25  
26  
27  
28  
29  
30  
31  
32  
33  
34  
35  
36  
37  
38  
39  
40 Your **name** and **personal details** will be kept **private**.  
41  
42  
43  
44  
45  
46  
47  
48  
49  
50  
51  
52  
53  
54  
55  
56  
57  
58  
59  
60





1  
2  
3 You can **say no at any time.**  
4  
5  
6  
7



33 We may use the **recordings** of **you** to make a **training package**  
34 (including a video).  
35  
36  
37  
38  
39  
40  
41  
42  
43  
44  
45  
46  
47  
48  
49  
50  
51  
52  
53  
54  
55  
56  
57  
58  
59  
60



1 You can have **your face blurred out** if you want.  
2  
3  
4  
5

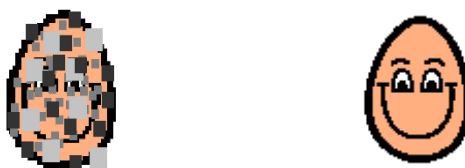

18 If you **do not want** to be in the training package we will **not include**  
19 **you** in the training package or video.  
20  
21



40 I **agree to take part** in the above research project and give my **consent**  
41 **freely**.  
42  
43  
44  
45  
46  
47  
48  
49  
50  
51  
52  
53  
54  
55  
56  
57  
58  
59  
60



I have been **given a copy** of the **Information Statement** and I understand that the **project** will be **carried out** as **explained**.



I understand and agree to:

- Complete **three tests** to assess how the stroke has affected **me**, my **language, concentration** and **memory**, at the **beginning of the project**.



- A **researcher** spending approximately **1 hour discussing** with me my opinion regarding how my hospital **environment affects** my stay in hospital and **what I do**.

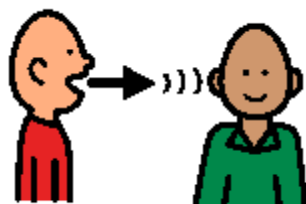

- 1  
2  
3  
4  
5  
6 • A researcher **video recording, observing** and **writing down** what is  
7 happening in my **environment** including **my activities**.  
8  
9  
10  
11  
12

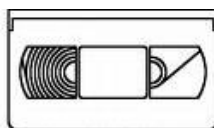

- 13  
14  
15  
16  
17  
18  
19  
20  
21  
22  
23  
24  
25  
26 • A researcher **looking at my hospital medical file** to collect  
27 **information** for the study.  
28  
29  
30

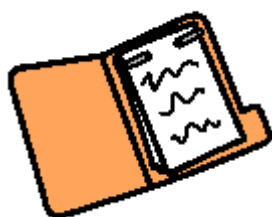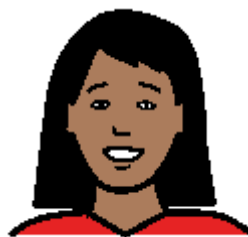

31  
32  
33  
34  
35  
36  
37  
38  
39  
40  
41  
42  
43 I **understand** that **my identity, personal information** and **data** will  
44 remain **confidential**.  
45  
46  
47  
48  
49  
50

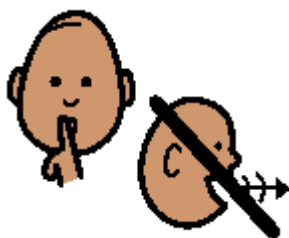

1  
2  
3 I have had the **opportunity** to **ask questions** about the study and am  
4  
5 **satisfied** with the **responses** that have been provided.  
6  
7  
8  
9  
10  
11



12  
13  
14  
15  
16  
17  
18  
19  
20  
21  
22  
23  
24  
25  
26  
27  
28  
29  
30  
31  
32  
33  
34  
35  
36  
37  
38  
39  
40  
41  
42  
43  
44  
45  
46  
47  
48  
49  
50  
51  
52  
53  
54  
55  
56  
57  
58  
59  
60

or peer review only

**Would you like to be involved?**

**Yes**

**No**

**I agree to the recordings of me to make a training package (including a video).**

**Yes**

**No**

**I would like my face blurred out.**

**Yes**

**No**



**Your Signature**

**Signature:** \_\_\_\_\_

**Print name:** \_\_\_\_\_

**Date:** \_\_\_\_\_

**Witness**

**Signature:** \_\_\_\_\_

**Print name:** \_\_\_\_\_

**Date:** \_\_\_\_\_

For peer review only

**Person responsible information sheet**  
**Stroke patients' communication activity in hospital**

This research project is being undertaken as part of the requirements of a PhD at Edith Cowan University.

Researchers' contact details

| Edith Cowan University                                                               |                                         |                  |
|--------------------------------------------------------------------------------------|-----------------------------------------|------------------|
| Chief Investigator/<br>PhD student                                                   | Sarah D'Souza                           | Ph: 0439 982 451 |
| Principal Supervisor                                                                 | Professor Beth Armstrong                | Ph: 08 6304 2769 |
| Co-Supervisor                                                                        | Associate Professor Natalie<br>Ciccione | Ph: 08 6304 2047 |
| Co-Supervisor                                                                        | Associate Professor Erin<br>Godecke     | Ph: 08 6304 5901 |
| Co-Supervisor                                                                        | Associate Professor Deborah<br>Hersh    | Ph: 08 6304 2563 |
| Hunter Stroke Service, University of Newcastle and Hunter Medical Research Institute |                                         |                  |
| Adjunct Supervisor                                                                   | Dr Heidi Janssen                        | Ph: 02 40420417  |

The participant is invited to take part in a research project. Sarah D'Souza, a Speech Pathologist and PhD student, is leading the study as Chief Investigator. This study has received ethical approval from ECU Human Research Ethics Committee and Hollywood Private Hospital Research Ethics Committee.

This project is investigating the hospital environment to see how this influences patient activity.

The participant has been selected to take part in this study as they have had a stroke and are receiving treatment at Hollywood Private Hospital. We are interested in

1 seeing how the hospital surroundings affect their communication activity throughout  
2 the day. Communication activity involves communication, such as talking with other  
3 patients, socialising, reading the paper, using the telephone, talking to staff, or  
4 engaging group activities including therapy.  
5  
6  
7  
8

9 This information sheet will explain the research project and will detail what is involved in the  
10 study. You will be given a copy of this information to keep for your reference.  
11  
12  
13  
14

15 Please read through all of the information carefully. You can ask the researcher questions  
16 about the study at any time.  
17  
18  
19  
20  
21

## 22 **Purpose of the research**

23  
24 Little is known about the impact of the hospital rehabilitation environment on patient  
25 communication activity levels during stroke recovery. This study will investigate how the  
26 hospital stroke ward environment influences patient communication activity levels. The  
27 information gathered from this study will assist in improving the Hollywood Private Hospital  
28 stroke ward environment to help the recovery of stroke survivors in the future.  
29  
30  
31  
32  
33  
34

## 35 **What does the stroke patient have to do?**

- 36  
37  
38  
39  
40
- 41 • Complete three tests and a recording of them talking to see how their stroke has  
42 affected their functioning including their language, concentration and memory. These  
43 tests will be conducted at the beginning of the project. The tests will take  
44 approximately 1 hour to complete with an option to complete the tests over two  
45 separate 30 minute sessions and with as many breaks as the participant needs.  
46  
47  
48  
49
  - 50 • Spend approximately 1 hour discussing with the researcher their opinion regarding how  
51 their rehabilitation surroundings affect their stay in hospital and activity levels.  
52  
53  
54  
55
  - 56 • Allow the researcher to video record, observe and write down what is happening in the  
57 participant's environment including their activities for a total of 12 hours over a 3 day  
58 period. Video recording is a useful way of capturing the details of everyday activities on  
59  
60



1 the ward. Often, people forget that the camera is there. Obviously, personal or private  
2 activity such as toileting would not be filmed. The participant may not want to be video  
3 recorded. If they request, they will not be video recorded. In this case the researcher  
4 will only observe, audio record and write down what is happening in their environment  
5 including their activities.  
6  
7  
8  
9

- 10
- 11 • A researcher will look at the participant's hospital medical file to collect information  
12 regarding:  
13
    - 14 • The participant's details (such as their age, living arrangements, occupation and  
15 level of functioning before stroke)
    - 16 • Any relevant conditions or diseases the participant may have
    - 17 • Information about the participant's stroke (for example when it happened, the  
18 area of the brain affected, how it has affected their functioning and abilities)
    - 19 • Details about how long the participant has been in hospital since their stroke
- 20  
21  
22  
23  
24  
25

26 The participant will not miss out on any treatment. Participation will not cost anything. After  
27 completing the tests and the interview the participant will be asked to continue their normal  
28 activities.  
29  
30  
31  
32  
33

34 The participant's hospital discharge will not be affected because they are in this study. The  
35 participant will be discharged from hospital when the hospital medical team decides that they  
36 are ready.  
37  
38  
39  
40  
41

42 There are no known risks of participating in this study. If the participant feels uncomfortable  
43 at any time, you or the participant are free to tell the researcher and observations within  
44 their room will stop immediately. The participant may become upset during the tests or the  
45 interview. If this happens you or the participant can ask to take a break or stop the interview.  
46  
47  
48  
49  
50

51 There will be no immediate benefit to you or the participant from taking part in this research;  
52 however **their participation will allow the collection of information that may help**  
53 **improve stroke hospital wards which may benefit future stroke survivors.**  
54  
55  
56  
57  
58  
59  
60

1 Participating in this study is completely voluntary. The participant can withdraw from taking  
2 part in the study at any time without giving a reason for withdrawing.  
3  
4  
5

6 The participant can request access to their research data at any time. They can request any  
7 of the information collected to be amended or removed if it is incorrect or they disagree with  
8 it. Please contact Sarah D'Souza (phone: 0439 982 451) if you would like to discuss  
9 accessing the participant's information.  
10  
11  
12  
13  
14  
15

16 The video, audio and written data will be identified by code. The information you provide will  
17 remain completely confidential. There will be no identifying information attached to the data  
18 and any information that may reveal the participant's identity will be removed. A list of  
19 participant names and codes will be kept in a locked filing cabinet at Hollywood Private  
20 Hospital and will only be accessible by the research team. All personal health information will  
21 be accessed, used and stored in accordance with Commonwealth Privacy Laws. The data will  
22 be stored on a password controlled computer or in a locked cabinet at Edith Cowan  
23 University. Electronic data will be backed-up on a password controlled hard drive only  
24 accessible by the Chief Investigator. Data will be stored for a maximum of 15 years after  
25 completion of the study. Video and audio recordings will then be permanently deleted and  
26 hard copy data will be shredded.  
27  
28  
29  
30  
31  
32  
33  
34  
35  
36  
37

38 Non-identifiable data will be accessible by researchers through data sharing archives. This  
39 data will be governed by an overarching body to ensure data is only used for approved  
40 research purposes. Researchers who access this data from the data bank will not have access  
41 to participant information therefore data will not be re-identifiable.  
42  
43  
44  
45  
46

47 The results of this study may be published in research journals or presented at conferences.  
48 The results will not include any information that may identify participants. Data may be used  
49 in higher degree by research studies in the future. In this circumstance, confidentiality will be  
50 maintained and no identifying information will be used.  
51  
52  
53  
54  
55  
56

57 Data collected from this study (including videos) may be used to develop training packages to  
58 improve future stroke survivors' communication activity levels in the future. We can blur out  
59  
60

1 the participant's face if they want. If they do not want to be in the training package we will  
2 not include them in the training package.  
3  
4  
5

6 At the end of the research project a summary of the results will be provided to you and the  
7 participant.  
8  
9

10  
11  
12  
13  
14  
15  
16  
17 If you have any questions or require any further information about the research project,  
18 please contact: Sarah D'Souza [Ph: 0439 982 451].  
19  
20  
21  
22  
23  
24  
25

26 Yours sincerely,  
27  
28  
29  
30  
31  
32

33 Sarah D'Souza  
34

35 If you have any concerns or complaints about the research project and wish to talk to an  
36 independent person, you may contact:  
37  
38

39 Kim Gifkins  
40

41 Senior Research Ethics Advisor  
42

43 Edith Cowan University  
44

45 270 Joondalup Drive  
46  
47

48 JOONDALUP WA 6027  
49

50 Phone: (08) 6304 2170  
51  
52

53 Email: [research.ethics@ecu.edu.au](mailto:research.ethics@ecu.edu.au)  
54  
55  
56  
57

58 This project has been approved by the ECU Human Research Ethics Committee and the  
59 Hollywood Private Hospital Research Ethics Committee.  
60

## Visitors and communication partners information and consent form

### Investigating Enhanced Environments after stroke

This research project is being undertaken as part of the requirements of a PhD at Edith Cowan University.

#### Researchers' contact details

| <b>Edith Cowan University</b>                                                               |                                     |                  |
|---------------------------------------------------------------------------------------------|-------------------------------------|------------------|
| Chief Investigator/<br>PhD student                                                          | Sarah D'Souza                       | Ph: 0439 982 451 |
| Principal Supervisor                                                                        | Professor Beth Armstrong            | Ph: 08 6304 2769 |
| Co-Supervisor                                                                               | Associate Professor Natalie Ciccone | Ph: 08 6304 2047 |
| Co-Supervisor                                                                               | Associate Professor Erin Godecke    | Ph: 08 6304 5901 |
| Co-Supervisor                                                                               | Associate Professor Deborah Hersh   | Ph: 08 6304 2563 |
| <b>Hunter Stroke Service, University of Newcastle and Hunter Medical Research Institute</b> |                                     |                  |
| Adjunct Supervisor                                                                          | Dr Heidi Janssen                    | Ph: 02 40420417  |

#### Description of the research project

This study is exploring stroke patient's experiences in regards to the environment of an in-patient stroke rehabilitation unit. We want to explore stroke patient communication activity, which includes activities such as talking with other patients and visitors, socialising, reading the paper, using the telephone, talking to staff, or engaging group activities including therapy.

The participant has agreed to take part in this study. They have agreed to be video recorded for a total of 12 hours over a three day period.

Your interactions with the patient will be video recorded and manually recorded by the chief investigator to explore patient communication activity levels. You can choose to be observed by the researcher only if you do not want to be video recorded. You do not need to do anything other than complete your usual tasks and activities. We will not record if you are having sensitive conversations with the participant, if they are behind closed curtains or completing sensitive tasks such as toileting or showering.

1 We may use the recordings of you to make a training package (including a video). You can have your face  
2 blurred if you want. If you do not want to be in the training package we will not include you in the training  
3 package.  
4

5  
6  
7  
8 There will be no cost to you associated with the investigation. Participation is completely voluntary. You do  
9 not have to participate if you don't want to. If you decide to participate you may withdraw at any time  
10 without giving a reason and withdrawing will not disadvantage you or the participant in any way.  
11  
12  
13

14  
15 You may also benefit from the knowledge that you are helping future stroke survivors. It is possible that you  
16 may not benefit from participating in this study. There are no known risks associated with participating in  
17 this study.  
18  
19  
20  
21  
22

### 23 **Confidentiality of information**

24  
25 The video, audio and written data will be identified by code. There will be no identifying information  
26 attached to the data and any information that may reveal your identity will be removed. A list of participant  
27 names and codes will be kept in a locked filing cabinet at Hollywood Private Hospital and will only be  
28 accessible by the research team. All data will be accessed, used and stored in accordance with  
29 Commonwealth Privacy Laws. The data will be stored on a password controlled computer or in a locked  
30 cabinet at Edith Cowan University. Electronic data will be backed-up on password controlled hard drive only  
31 accessible by the Chief Investigator. Data will be stored for a maximum of 15 years after completion of the  
32 study. Video and audio recordings will then be permanently deleted and hard copy data will be shredded.  
33  
34  
35  
36  
37  
38  
39  
40

41 Non-identifiable data will be accessible by researchers through data sharing archives. This data will be  
42 governed by an overarching body to ensure data is only used for approved research purposes.

43 Researchers who access this data from the data bank will not have access to participant information  
44 therefore data will not be re-identifiable.  
45  
46  
47  
48  
49

50 The results of this study may be published in research journals or presented at conferences. The results  
51 will not include any information that may identify participants. Data may be used in higher degree by  
52 research studies in the future. In this circumstance, confidentiality will be maintained and no identifying  
53 information will be used.  
54  
55  
56  
57  
58

59 Please read this Information Statement and be sure you understand its content before you consent to take  
60 part.

1  
2 If you would like to take part, please complete the consent form and return it to Sarah D'Souza or a  
3 member of the research team.  
4  
5  
6  
7

8 **Questions or further information?**

9 If you have any questions or require any further information about the research project, please contact:  
10 Sarah D'Souza [Ph: 0439 982 451]  
11  
12  
13  
14

15 Thank you for considering the invitation to take part in this research project.  
16  
17

18  
19 Yours sincerely,  
20  
21  
22

23  
24 Sarah D'Souza  
25  
26  
27

28 If you have any concerns or complaints about the research project and wish to talk to an independent  
29 person, you may contact: Kim Gifkins  
30  
31

32 Research Ethics Officer  
33  
34

35 Edith Cowan University  
36  
37

38 270 Joondalup Drive  
39  
40

41 JOONDALUP WA 6027  
42  
43

44 Phone: (08) 6304 2170  
45  
46

47 Email: [research.ethics@ecu.edu.au](mailto:research.ethics@ecu.edu.au)  
48  
49

50 This project has been approved by the ECU Human Research Ethics Committee and the Hollywood Private  
51 Hospital Research Ethics Committee.  
52  
53  
54  
55  
56  
57  
58  
59  
60

1 I \_\_\_\_\_ (print name), give my consent freely and  
2 agree to participate in observations of my interactions with the participant.

3 **Yes**      **No**      (please circle)  
4  
5

6 I agree to the researcher video recording my interactions with the participant

7  
8 **Yes**      **No**      (please circle)  
9

10  
11 I agree to be included in a training package (including a video).

12  
13 **Yes**      **No**      (please circle)  
14  
15

16 If I am included in the video training package I would like my face blurred out.

17  
18 **Yes**      **No**      (please circle)  
19

20  
21 I understand the project will be conducted as stated in the information letter, a copy of which I have  
22 retained.  
23

24  
25 I understand I can withdraw from the project at any time and do not have to give a reason for withdrawing.  
26  
27

28 I understand personal information will remain confidential to the researchers.  
29

30  
31 I have been given the opportunity to raise any questions or concerns I have and am satisfied with the  
32 responses I was given.  
33  
34  
35

36 **Participant**

37  
38 **Print name:** \_\_\_\_\_  
39

40 **Signature:** \_\_\_\_\_  
41

42 **Phone number:** \_\_\_\_\_  
43

44 **Email address:** \_\_\_\_\_  
45

46 **Date:** \_\_\_\_\_

47 **Witness**

48 **Print name:** \_\_\_\_\_  
49

50 **Signature:** \_\_\_\_\_  
51

52 **Date:** \_\_\_\_\_  
53  
54  
55  
56  
57  
58  
59  
60

## Staff information and consent form

### Investigating Enriched Environments after stroke

This research project is being undertaken as part of the requirements of a PhD at Edith Cowan University.

#### Researchers' contact details

| Edith Cowan University                                                               |                                     |                  |
|--------------------------------------------------------------------------------------|-------------------------------------|------------------|
| Chief Investigator/<br>PhD student                                                   | Sarah D'Souza                       | Ph: 0439 982 451 |
| Principal Supervisor                                                                 | Professor Beth Armstrong            | Ph: 08 6304 2769 |
| Co-Supervisor                                                                        | Associate Professor Natalie Ciccone | Ph: 08 6304 2047 |
| Co-Supervisor                                                                        | Associate Professor Erin Godecke    | Ph: 08 6304 5901 |
| Co-Supervisor                                                                        | Associate Professor Deborah Hersh   | Ph: 08 6304 2563 |
| Hunter Stroke Service, University of Newcastle and Hunter Medical Research Institute |                                     |                  |
| Adjunct Supervisor                                                                   | Dr Heidi Janssen                    | Ph: 02 40420417  |

#### Description of the research project

This study is exploring staff and stroke patient's experiences in regards to the environment of the Edwards and Woods wards at Hollywood Private Hospital. We want to explore stroke patient communication activity, which includes activities such as talking with other patients, socialising, reading the paper, using the telephone, talking to staff, or engaging group activities including therapy. We would like to explore staffs' perceptions of barriers and facilitators to communication activity on the wards and address these in order to enhance the ward environment.

Staff have been selected to participate in order to gain a range of perspectives in regards to the day to day operations, procedures, policies and interactions that influence the environment of the Edwards and Woods wards. A training program for staff will be designed to address barriers and facilitators identified on the wards.

There are two components of this research study that involve staff. You may wish to consent to participate in one or both parts of this study.



1  
2  
3 **Part 1:** Stroke in-patients will be video recorded for a total of 12 hours over a three day period. Your  
4 interactions with the patient will be video recorded and manually recorded by a member of the research  
5 team to explore patient communication activity levels. You can choose to be observed by the researcher  
6 only if you do not want to be video recorded. You do not need to do anything other than complete your  
7 usual daily tasks and activities. We will not record if you are behind closed curtains or completing sensitive  
8 tasks such as toileting or showering the patient.  
9  
10  
11  
12  
13  
14

15 We may want use the recordings of you to make a training package (including a video). We will show you  
16 the video we want to use and explain exactly how this will be used before we do anything. You can have  
17 your face blurred out if you want. If you don't want to be included in the training package we will not include  
18 any videos of you in the training package.  
19  
20  
21  
22  
23

24 **Part 2:** You will be asked to take part in the following:  
25

- 26 • A focus group with the researcher and your co-workers for approximately 1 hour to explore your  
27 perceptions of environmental barriers and facilitators to activity.
- 28 • Attend a training program for approximately 1.5 hours. This will focus on training staff to promote  
29 patient communication on the ward. This session will be located at Hollywood Private Hospital and  
30 will be offered over several dates to facilitate your ability to attend. If you are unable to attend the  
31 training program we may provide training and video resources to facilitate your participation in  
32 training.
- 33 • Complete an anonymous short questionnaire before and after attending the training program to gain  
34 feedback on training and explore your perception of changes in your knowledge, skills and attitudes  
35 towards communication and aphasia.
- 36 • A final focus group with the researcher for approximately 1 hour to again explore your perceptions  
37 of environmental barriers and facilitators to activity.

38 The focus groups will be tape recorded however at any stage you may ask for the tape to stopped,  
39 edited or have your comments erased.  
40  
41  
42  
43  
44  
45  
46  
47  
48  
49  
50

51 There will be no cost to you associated with the investigation. Participation is completely voluntary. You do  
52 not have to participate if you don't want to. If you decide to participate you may withdraw at any time  
53 without giving a reason and withdrawing will not disadvantage you in any way.  
54  
55  
56  
57  
58

59 You may benefit from gaining knowledge and skills regarding communication from attending the training  
60 program. Additionally, you may also benefit from the knowledge that you are helping future stroke

1 survivors. It is possible that you may not benefit from participating in this study. There are no known risks  
2 associated with participating in this study.  
3  
4  
5

## 6 **Confidentiality of information** 7

8 The information you provide during the interviews will be audio recorded by the Chief Investigator. Your  
9 perspectives and opinions will be analysed and grouped into common 'themes' and 'stories'. This will be  
10 used to inform the development and review of the training program.  
11  
12  
13

14  
15  
16 The video, audio and written data will be identified by code. The information you provide will remain  
17 completely confidential. There will be no identifying information attached to the data and any information  
18 that may reveal your identity will be removed. A list of participant names and codes will be kept in a locked  
19 filing cabinet at Hollywood Private Hospital and will only be accessible by the research team. All data will be  
20 accessed, used and stored in accordance with Commonwealth Privacy Laws. The data will be stored on a  
21 password controlled computer or in a locked cabinet at Edith Cowan University. Electronic data will be  
22 backed-up on a password controlled hard drive only accessible by the Chief Investigator. Data will be  
23 stored for a maximum of 15 years after completion of the study. Video and audio recordings will then be  
24 permanently deleted and hard copy data will be shredded.  
25  
26  
27  
28  
29  
30  
31  
32

33 Non-identifiable data will be accessible by researchers through data sharing archives. This data will be  
34 governed by an overarching body to ensure data is only used for approved research purposes.  
35 Researchers who access this data from the data bank will not have access to participant information  
36 therefore data will not be re-identifiable.  
37  
38  
39  
40  
41  
42

43 The results of this study may be published in research journals or presented at conferences. The results  
44 will not include any information that may identify participants. Data may be used in higher degree by  
45 research studies in the future. In this circumstance, confidentiality will be maintained and no identifying  
46 information will be used.  
47  
48  
49  
50

51 A summary of the results will be provided through Hollywood Private Hospital 18 months after the  
52 completion of the study.  
53  
54  
55  
56

57 Please read this Information Statement and be sure you understand its content before you consent to take  
58 part.  
59  
60

1  
2 If you would like to take part, please complete the consent form and return it to Sarah D'Souza, Claire  
3 Tucak or a member of the research team.  
4  
5  
6  
7

8 ***Questions or further information?***

9 You may wish to consult with your manager before agreeing to take part in this study.  
10  
11  
12  
13

14 If you have any questions or require any further information about the research project, please contact:  
15 Sarah D'Souza [Ph: 0439 982 451]  
16  
17  
18  
19

20 Thank you for considering the invitation to take part in this research project.  
21  
22  
23

24 Yours sincerely,  
25  
26  
27  
28  
29  
30

31 Sarah D'Souza  
32  
33  
34

35 If you have any concerns or complaints about the research project and wish to talk to an independent  
36 person, you may contact: Kim Gifkins  
37  
38

39 Research Ethics Officer  
40

41 Edith Cowan University  
42

43 270 Joondalup Drive  
44

45 JOONDALUP WA 6027  
46  
47

48 Phone: (08) 6304 2170  
49

50 Email: [research.ethics@ecu.edu.au](mailto:research.ethics@ecu.edu.au)  
51  
52  
53  
54

55 This project has been approved by the ECU Human Research Ethics Committee and the Hollywood Private  
56 Hospital Research Ethics Committee.  
57  
58  
59  
60

I \_\_\_\_\_ (print name), give my consent freely and agree to participate in (please circle):

**Part 1:**

Yes                      No                      **Observations** of your interactions with stroke patients.

Yes                      No                      **Video recording** of your interactions with stroke patients.

**Part 2:**

Yes                      No                      Complete two focus groups with the researcher, complete two short questionnaires and attend a training program.

I understand the project will be conducted as stated in the information letter, a copy of which I have retained.

I understand I can withdraw from the project at any time and do not have to give a reason for withdrawing.

I understand personal information will remain confidential to the researchers.

I have been given the opportunity to raise any questions or concerns I have and am satisfied with the responses I was given.

**Participant**

**Print name:** \_\_\_\_\_

**Signature:** \_\_\_\_\_

**Phone number:** \_\_\_\_\_

**Email address:** \_\_\_\_\_

**Date:** \_\_\_\_\_

**Witness**

**Print name:** \_\_\_\_\_

**Signature:** \_\_\_\_\_

**Date:** \_\_\_\_\_

**Volunteer information and consent form**  
**Investigating Enriched Environments after stroke**

This research project is being undertaken as part of the requirements of a PhD at Edith Cowan University.

**Researchers' contact details**

| <b>Edith Cowan University</b>                                                               |                                     |                  |
|---------------------------------------------------------------------------------------------|-------------------------------------|------------------|
| Chief Investigator/<br>PhD student                                                          | Sarah D'Souza                       | Ph: 0439 982 451 |
| Principal Supervisor                                                                        | Professor Beth Armstrong            | Ph: 08 6304 2769 |
| Co-Supervisor                                                                               | Associate Professor Natalie Ciccone | Ph: 08 6304 2047 |
| Co-Supervisor                                                                               | Associate Professor Erin Godecke    | Ph: 08 6304 5901 |
| Co-Supervisor                                                                               | Associate Professor Deborah Hersh   | Ph: 08 6304 2563 |
| <b>Hunter Stroke Service, University of Newcastle and Hunter Medical Research Institute</b> |                                     |                  |
| Adjunct Supervisor                                                                          | Dr Heidi Janssen                    | Ph: 02 40420417  |

**Description of the research project**

This study is a Communication Enhanced Environment (CEE) at Hollywood Private Hospital. A CEE involves several initiatives that aim to provide more opportunities for communication for stroke survivors on the ward. One of these initiatives involves the participation of volunteers.

**As a volunteer participant, you will be asked to take part in the following:**

- Attend a training program for approximately 1.5 hours. This will focus on training volunteers in communicating with stroke patients with communication difficulties. This session will be located at Hollywood Private Hospital and will be offered over several dates to facilitate your ability to attend. If you are unable to attend the training program we may provide training and video resources to facilitate your participation in training.
- Complete an anonymous short questionnaire before and after attending the training program to obtain your feedback on the training session.

- A focus group with the researcher and other volunteers for approximately 1 hour to explore your perceptions of communicating with stroke patients. The focus group will be tape recorded however at any stage you may ask for the tape to stopped, edited or have your comments erased.
- Host a communal dining and lounge area once a week to offer tea and coffee and provide social companionship for stroke patients.
- Your interactions with the patient may be video recorded and manually recorded by a member of the research team to explore patient communication activity levels. You can choose to be observed by the researcher only if you do not want to be video recorded. We will not record if you are having sensitive conversations with the stroke patient/s.

There will be no cost to you associated with participating in this study. Participation is completely voluntary. You do not have to participate if you don't want to. If you decide to participate you may withdraw at any time without giving a reason and withdrawing will not disadvantage you in any way.

You may benefit from gaining knowledge and skills regarding communication from attending the training program. Additionally, you may also benefit from the knowledge that you are helping future stroke survivors. It is possible that you may not benefit from participating in this study. There are no known risks associated with participating in this study.

### **Confidentiality of information**

The information you provide during the interviews will be audio recorded by the Chief Investigator. Your perspectives and opinions will be analysed and grouped into common 'themes' and 'stories'.

The video, audio and written data will be identified by code. The information you provide will remain completely confidential. There will be no identifying information attached to the data and any information that may reveal your identity will be removed. A list of participant names and codes will be kept in a locked filing cabinet at Hollywood Private Hospital and will only be accessible by the research team. All data will be accessed, used and stored in accordance with Commonwealth Privacy Laws. The data will be stored on a password controlled computer or in a locked cabinet at Edith Cowan University. Electronic data will be backed-up on a password controlled hard drive only accessible by the Chief Investigator. Data will be stored for a maximum of 15 years after completion of the study. Video and audio recordings will then be permanently deleted and hard copy data will be shredded.

Non-identifiable data will be accessible by researchers through data sharing archives. This data will be governed by an overarching body to ensure data is only used for approved research purposes.

1 Researchers who access this data from the data bank will not have access to participant information  
2 therefore data will not be re-identifiable.  
3  
4  
5

6 The results of this study may be published in research journals or presented at conferences. The results  
7 will not include any information that may identify participants. Data may be used in higher degree by  
8 research studies in the future. In this circumstance, confidentiality will be maintained and no identifying  
9 information will be used.  
10  
11  
12  
13  
14

15 A summary of the results will be provided through Hollywood Private Hospital 18 months after the  
16 completion of the study.  
17  
18  
19  
20

21 Please read this Information Statement and be sure you understand its content before you consent to take  
22 part.  
23  
24  
25  
26

27 If you would like to take part, please complete the consent form and return it to Sarah D'Souza, Claire  
28 Tucak or a member of the research team.  
29  
30  
31  
32

### 33 **Questions or further information?** 34 35 36

37 If you have any questions or require any further information about the research project, please contact:  
38 Sarah D'Souza [Ph: 0439 982 451]  
39  
40  
41  
42

43 Thank you for considering the invitation to take part in this research project.  
44  
45  
46

47 Yours sincerely,  
48  
49  
50  
51  
52  
53

54 Sarah D'Souza  
55  
56  
57

58 If you have any concerns or complaints about the research project and wish to talk to an independent  
59 person, you may contact: Kim Gifkins  
60

1 Research Ethics Officer

2 Edith Cowan University

3  
4 270 Joondalup Drive

5  
6 JOONDALUP WA 6027

7  
8  
9 Phone: (08) 6304 2170

10  
11 Email: [research.ethics@ecu.edu.au](mailto:research.ethics@ecu.edu.au)

12  
13  
14  
15  
16 This project has been approved by the ECU Human Research Ethics Committee and the Hollywood Private  
17 Hospital Research Ethics Committee.  
18  
19  
20  
21  
22  
23  
24  
25  
26  
27  
28  
29  
30  
31  
32  
33  
34  
35  
36  
37  
38  
39  
40  
41  
42  
43  
44  
45  
46  
47  
48  
49  
50  
51  
52  
53  
54  
55  
56  
57  
58  
59  
60

For peer review only



1 I \_\_\_\_\_ (print name), give my consent freely and  
2 agree to participate in (please circle) this study as described in this information and consent form.  
3  
4

5 I understand the project will be conducted as stated in the information letter, a copy of which I have  
6 retained.  
7  
8

9 I understand I can withdraw from the project at any time and do not have to give a reason for withdrawing.  
10  
11

12 I understand personal information will remain confidential to the researchers.  
13  
14

15 I have been given the opportunity to raise any questions or concerns I have and am satisfied with the  
16 responses I was given.  
17  
18  
19

20  
21 **Participant**

22 **Print name:** \_\_\_\_\_  
23

24 **Signature:** \_\_\_\_\_  
25

26 **Phone number:** \_\_\_\_\_  
27

28 **Email address:** \_\_\_\_\_  
29

30 **Date:** \_\_\_\_\_  
31

32 **Witness**

33 **Print name:** \_\_\_\_\_  
34

35 **Signature:** \_\_\_\_\_  
36

37 **Date:** \_\_\_\_\_  
38  
39  
40  
41  
42  
43  
44  
45  
46  
47  
48  
49  
50  
51  
52  
53  
54  
55  
56  
57  
58  
59  
60

# BMJ Open

**Hospital staff's, volunteers', and patients' perceptions of barriers and facilitators to communication following stroke in an acute and rehabilitation private hospital ward: A qualitative description study.**

|                                 |                                                                                                                                                                                                                                                                                                                                                                                                                                                                                                                                                                                                                                                                        |
|---------------------------------|------------------------------------------------------------------------------------------------------------------------------------------------------------------------------------------------------------------------------------------------------------------------------------------------------------------------------------------------------------------------------------------------------------------------------------------------------------------------------------------------------------------------------------------------------------------------------------------------------------------------------------------------------------------------|
| Journal:                        | <i>BMJ Open</i>                                                                                                                                                                                                                                                                                                                                                                                                                                                                                                                                                                                                                                                        |
| Manuscript ID                   | bmjopen-2020-043897.R3                                                                                                                                                                                                                                                                                                                                                                                                                                                                                                                                                                                                                                                 |
| Article Type:                   | Original research                                                                                                                                                                                                                                                                                                                                                                                                                                                                                                                                                                                                                                                      |
| Date Submitted by the Author:   | 16-Mar-2021                                                                                                                                                                                                                                                                                                                                                                                                                                                                                                                                                                                                                                                            |
| Complete List of Authors:       | D'Souza, Sarah; Edith Cowan University, School of Medical and Health Sciences; La Trobe University, Centre for Aphasia Recovery and Rehabilitation Research<br>Godecke, Erin; Edith Cowan University, School of Medical and Health Sciences; La Trobe University, Centre for Aphasia Recovery and Rehabilitation Research<br>Ciccione, Natalie; Edith Cowan University, School of Medical and Health Sciences<br>Hersh, Deborah; Edith Cowan University, School of Medical and Health Sciences<br>Janssen, Heidi; The University of Newcastle Hunter Medical Research Institute<br>Armstrong, Elizabeth; Edith Cowan University, School of Medical and Health Sciences |
| <b>Primary Subject Heading</b>: | Neurology                                                                                                                                                                                                                                                                                                                                                                                                                                                                                                                                                                                                                                                              |
| Secondary Subject Heading:      | Qualitative research, Rehabilitation medicine                                                                                                                                                                                                                                                                                                                                                                                                                                                                                                                                                                                                                          |
| Keywords:                       | Stroke < NEUROLOGY, Adult neurology < NEUROLOGY, QUALITATIVE RESEARCH                                                                                                                                                                                                                                                                                                                                                                                                                                                                                                                                                                                                  |
|                                 |                                                                                                                                                                                                                                                                                                                                                                                                                                                                                                                                                                                                                                                                        |

SCHOLARONE™  
Manuscripts



I, the Submitting Author has the right to grant and does grant on behalf of all authors of the Work (as defined in the below author licence), an exclusive licence and/or a non-exclusive licence for contributions from authors who are: i) UK Crown employees; ii) where BMJ has agreed a CC-BY licence shall apply, and/or iii) in accordance with the terms applicable for US Federal Government officers or employees acting as part of their official duties; on a worldwide, perpetual, irrevocable, royalty-free basis to BMJ Publishing Group Ltd ("BMJ") its licensees and where the relevant Journal is co-owned by BMJ to the co-owners of the Journal, to publish the Work in this journal and any other BMJ products and to exploit all rights, as set out in our [licence](#).

The Submitting Author accepts and understands that any supply made under these terms is made by BMJ to the Submitting Author unless you are acting as an employee on behalf of your employer or a postgraduate student of an affiliated institution which is paying any applicable article publishing charge ("APC") for Open Access articles. Where the Submitting Author wishes to make the Work available on an Open Access basis (and intends to pay the relevant APC), the terms of reuse of such Open Access shall be governed by a Creative Commons licence – details of these licences and which [Creative Commons](#) licence will apply to this Work are set out in our licence referred to above.

Other than as permitted in any relevant BMJ Author's Self Archiving Policies, I confirm this Work has not been accepted for publication elsewhere, is not being considered for publication elsewhere and does not duplicate material already published. I confirm all authors consent to publication of this Work and authorise the granting of this licence.

## Title page

### Title

Hospital staff's, volunteers', and patients' perceptions of barriers and facilitators to communication following stroke in an acute and rehabilitation private hospital ward: A qualitative description study.

### Authors

Sarah D'Souza<sup>1,2</sup>, Erin Godecke<sup>1,2</sup>, Natalie Ciccone<sup>1</sup>, Deborah Hersh<sup>1</sup>, Heidi Janssen<sup>3</sup>, Elizabeth Armstrong<sup>1</sup>

### Affiliations

1. Edith Cowan University, Perth, Western Australia, Australia
2. La Trobe University, Centre for Aphasia Recovery and Rehabilitation Research  
Melbourne, Victoria, Australia
3. Hunter New England Local Health District, NSW Health, New South Wales, Australia

### Addresses of all authors

Sarah D'Souza

School of Medical and Health Sciences, Edith Cowan University  
270 Joondalup Drive, Joondalup 6027, Australia  
s.dsouza@ecu.edu.au

Associate Professor Erin Godecke

School of Medical and Health Sciences, Edith Cowan University  
270 Joondalup Drive, Joondalup, WA 6027, Australia.  
e.godecke@ecu.edu.au

Associate Professor Natalie Ciccone

School of Medical and Health Sciences, Edith Cowan University

1  
2  
3 270 Joondalup Drive, Joondalup 6027, Australia

4  
5  
6 n.cicccone@ecu.edu.au

7  
8 Associate Professor Deborah Hersh

9  
10 School of Medical and Health Sciences, Edith Cowan University

11  
12  
13 270 Joondalup Drive, Joondalup, WA 6027, Australia

14  
15  
16 d.hersh@ecu.edu.au

17  
18 Dr Heidi Janssen

19  
20 Hunter Medical Research Institute

21  
22  
23 Lot 1, Kookaburra Circuit, New Lambton Heights NSW 2305

24  
25  
26 Heidi.Janssen@health.nsw.gov.au

27  
28 Professor Elizabeth Armstrong

29  
30 School of Medical and Health Sciences, Edith Cowan University

31  
32  
33 270 Joondalup Drive, Joondalup, WA 6027, Australia

34  
35  
36 b.armstrong@ecu.edu.au

37  
38  
39  
40 **Key words:** stroke, adult neurology, qualitative research

41  
42  
43 **Corresponding author:** Sarah D'Souza is the corresponding author, s.dsouza@ecu.edu.au

44  
45  
46  
47 The Corresponding Author has the right to grant on behalf of all authors and does grant on  
48 behalf of all authors, an exclusive licence (or non-exclusive for government employees) on a  
49 worldwide basis to the BMJ Publishing Group Ltd to permit this article (if accepted) to be  
50 published in BMJ editions and any other BMJ PGL products and sublicences such use and  
51 exploit all subsidiary rights, as set out in our licence.  
52  
53  
54  
55  
56  
57  
58  
59  
60

1  
2  
3 All authors have completed the [Unified Competing Interest form](#)) and declare: This research  
4 was funded by The Hollywood Private Hospital Research Grant (RF087). SD received an  
5 Australian Post Graduate Award Scholarship for the first year of this study and received an  
6 ECU Research Travel Grant. No other support from any organisation for the submitted work;  
7 no financial relationships with any organisations that might have an interest in the  
8 submitted work in the previous three years, no other relationships or activities that could  
9 appear to have influenced the submitted work.  
10  
11  
12  
13  
14  
15  
16  
17  
18

19 The lead author (the manuscript's guarantor) affirms that the manuscript is an honest,  
20 accurate, and transparent account of the study being reported; that no important aspects of  
21 the study have been omitted; and that any discrepancies from the study as planned have  
22 been explained.  
23  
24  
25  
26  
27  
28  
29  
30  
31  
32  
33  
34  
35  
36  
37  
38  
39  
40  
41  
42  
43  
44  
45  
46  
47  
48  
49  
50  
51  
52  
53  
54  
55  
56  
57  
58  
59  
60

## Abstract

**Objectives:** To explore barriers and facilitators to patient communication in an acute and rehabilitation ward setting from the perspectives of hospital staff, volunteers and patients following stroke.

**Design:** A qualitative descriptive study as part of a larger study which aimed to develop and test a Communication Enhanced Environment in an acute and a rehabilitation ward.

**Setting:** A metropolitan Australian private hospital.

**Participants:** Focus groups with acute and rehabilitation doctors, nurses, allied health staff and volunteers (n=51) and interviews with patients following stroke (n=7), including three with aphasia, were conducted.

**Results:** The key themes related to barriers and facilitators to communication, contained sub-categories related to hospital, staff and patient factors. Hospital related barriers to communication were private rooms, mixed wards, the physical hospital environment, hospital policies, the power imbalance between staff and patients, and task specific communication. Staff related barriers to communication were staff's perception of time pressures, underutilisation of available resources, staff individual factors such as personality, role perception and lack of knowledge and skills regarding communication strategies. The patient related barrier to communication involved patients' functional and medical status. Hospital related facilitators to communication were shared rooms/co-location of patients, visitors and volunteers. Staff related facilitators to communication were utilisation of resources, speech pathology support, staff knowledge and utilisation of communication strategies and individual staff factors such as personality. No patient related facilitators to communication were reported by staff, volunteers or patients.

**Conclusions:** Barriers and facilitators to communication appeared to be interconnected and likely to influence one another suggests communication access may vary between patients within the same setting. Practical changes may promote communication opportunities for patients in hospital early after stroke such as access to areas for patient co-location as well as areas for privacy, encouraging visitors, enhancing patient autonomy, and providing communication trained health staff and volunteers.

### Study strengths

- This study involved a large number of staff in comparison to previous studies and included volunteers as well patients after stroke with and without aphasia.
- Data saturation was reached within the staff focus groups.

### Study limitations

- The results in this study reflect the perceptions of a small number of medical (n=2) and nursing staff (n= 11) compared to allied health staff (N= 32).
- This study involved exploring the perceptions a small number of patients; a broader range of perspectives may have been expressed with a larger number of participants.
- This study was conducted at a private hospital involving a mixed acute and a mixed rehabilitation ward therefore these results reflect this context.



## Background

Aphasia research supports the theory that commencing aphasia rehabilitation in the early phase post-stroke (<1-month post-stroke) results in better outcomes than therapy commenced in the chronic phase (>6-months post stroke).<sup>1,2</sup> However, patients in hospital following stroke spend on average 50-94% of their day inactive.<sup>3,4</sup> Despite improvements in functional independence during their hospital admission following stroke, patients' engagement in cognitive and social activity remains largely unchanged.<sup>5</sup> Patients with aphasia spend two thirds less time engaged in social interactions with family and friends compared to those without aphasia.<sup>6</sup> A lack of social and cognitive activity early after stroke for patients with aphasia has the potential to contribute to: i) the development of maladaptive compensatory communication behaviours, and ii) the learned non-use of language, which may ultimately impact on their quality of life and overall language recovery.<sup>6</sup>

Patients following stroke with and without aphasia have described time outside therapy as "dead" and "wasted", reporting a lack of stimulation and inactivity in hospital impacting their ability to self-direct their rehabilitation outside of therapy.<sup>7</sup> They report the experience of boredom is worse in the evenings and weekends when there are less structured activities.<sup>8</sup> They also perceive that boredom negatively influences their mood, motivation, and contributes to their experience of post-stroke fatigue.<sup>8</sup> Boredom is associated with a loss of autonomy and sense of control and contributes to patients becoming passive recipients of care, which may have negative implications for stroke recovery.<sup>8</sup>

This study aimed to explore hospital staff and volunteer, and patient perceptions of barriers and facilitators to patient communication in an acute and a rehabilitation hospital ward. Identifying barriers and facilitators to patients' communication will inform the development of a Communication Enhanced Environment (CEE) model for the purposes of increasing their engagement in language activity within a hospital ward to maximise post-stroke aphasia language recovery.

## Methods

### Design

1  
2  
3 This study was part of a larger study which aimed to develop and test a CEE model  
4 within an acute and a rehabilitation ward (see supplementary file for study protocol and  
5 procedure). This study contributed to the baseline phase of the larger study outlined below:  
6  
7

- 8  
9 *i) Baseline phase:* observe and quantify levels of engagement in language activity in the  
10 acute and rehabilitation ward environment for patients following stroke, and explore  
11 hospital staff, volunteers, and patients' perceptions of barriers and facilitators to  
12 communication in hospital;  
13  
14  
15  
16 *ii) Implementation phase:* develop and implement the CEE model on the acute and  
17 rehabilitation wards;  
18  
19  
20 *iii) Post-implementation phase:* assess the impact of the CEE model on patient  
21 engagement in language activity, and hospital staff, volunteers and patients'  
22 perceptions of barriers to communication in hospital.  
23  
24

### 25 26 **Ethical approval**

27  
28 This study has Ethics approval from the Edith Cowan University Human Research  
29 Ethics Committee (ECU HREC 12149) and The Hollywood Private Hospital Research Ethics  
30 Committee (HPH431).  
31  
32

### 33 34 **Reporting guidelines**

35  
36 The consolidated criteria for reporting qualitative studies (COREQ)<sup>9</sup> was used to  
37 guide reporting this study (Appendix A.).  
38  
39

### 40 41 **Research authors' relationship with participants**

42 The first author who was external to the hospital conducted focus groups and  
43 interviews. The first author engaged key hospital team members for the duration of the  
44 study to inform the study design to ensure it aligned with the hospital policies and priorities.  
45  
46  
47

### 48 49 **Patient and public involvement**

50 Patients and the public were not involved in the design of this study however this  
51 data informed the development of the CEE model in the larger study. A working group  
52 consisting of key members of the stroke multidisciplinary team provided feedback on this  
53 study's findings and were involved in the development of the CEE model and embedding  
54 approach, which was based on the outcomes of this study.  
55  
56  
57

### 58 59 **Setting**

60

This study was conducted on an acute and a rehabilitation ward at a private hospital in Perth, Western Australia. The acute ward was a 26-bed unit with patients following acute stroke as well as other medical conditions. The acute ward had four individual rooms and nine shared rooms, two rooms with four beds per room, and seven rooms with two beds per room. Patients ate meals in their rooms and had access to an outdoor balcony area. The rehabilitation ward was a 44-bed mixed rehabilitation unit for patients following stroke and other medical, orthopaedic and post-surgical conditions. There were thirty-six individual rooms, and four shared rooms with two beds in each room. Patients had breakfast in their rooms but were encouraged to eat lunch and dinner in one of two communal dining areas.

### Participants

*Hospital staff participants:* Purposeful sampling of acute and rehabilitation hospital staff was conducted to include at least one representative from each acute and rehabilitation staff group including medical, nursing, volunteers, and allied health staff members who were over 18 years of age. The first author obtained formal consent from all participants in the study (see supplementary file for consent forms and procedures). A total of 51 staff and volunteers were recruited (Table 1.) by contacting staff department managers who identified staff currently working or had previously worked with patients following stroke on the acute or rehabilitation wards.

Table 1. Staff participants

| Staff/volunteer groups       |   |                                    |   |                |   |
|------------------------------|---|------------------------------------|---|----------------|---|
| Medical & Nursing            | N | Allied Health                      | N | Volunteer      | N |
| Acute nurses (AN)            | 2 | Dietitian (DT)                     | 1 | Volunteers (V) | 6 |
| Clinical nurse manager (CNM) | 1 | Occupational therapy manager (OTM) | 1 |                |   |
| Medical consultants (MC)     | 2 | Occupational therapists (OT)       | 5 |                |   |

1  
2  
3  
4  
5  
6  
7  
8  
9  
10  
11  
12  
13  
14  
15  
16  
17  
18  
19  
20  
21  
22  
23  
24  
25  
26  
27  
28  
29  
30  
31  
32  
33  
34  
35  
36  
37  
38  
39  
40  
41  
42  
43  
44  
45  
46  
47  
48  
49  
50  
51  
52  
53  
54  
55  
56  
57  
58  
59  
60

|                               |   |                                          |   |
|-------------------------------|---|------------------------------------------|---|
| Rehabilitation nurses<br>(RN) | 8 | Occupational therapy<br>assistants (OTA) | 3 |
|                               |   | Physiotherapists (PT)                    | 8 |
|                               |   | Physiotherapy<br>assistants (PTA)        | 2 |
|                               |   | Social workers (SW)                      | 5 |
|                               |   | Speech pathology<br>manager (SPM)        | 1 |
|                               |   | Speech pathologists<br>(SP)              | 4 |
|                               |   | Speech pathology<br>assistant (SPA)      | 1 |
|                               |   | Volunteer manager<br>(VM)                | 1 |

---

1  
2  
3  
4  
5  
6  
7  
8  
9  
10  
11  
12  
13  
14  
15  
16  
17  
18  
19  
20  
21  
22  
23  
24  
25  
26  
27  
28  
29  
30  
31  
32  
33  
34  
35  
36  
37  
38  
39  
40  
41  
42  
43  
44  
45  
46  
47  
48  
49  
50  
51  
52  
53  
54  
55  
56  
57  
58  
59  
60

*Patient participants:* All patients consecutively admitted following stroke from January to February 2016, and June 2016 to July 2017 were screened for eligibility by the hospital site champions to participate in the study. Inclusion criteria: i) admitted to the acute or rehabilitation ward with an acute stroke, ii) less than 21 days post-stroke during data collection, iii) able to provide informed consent based on the judgement of the medical team responsible for the medical management of the patient, iv) Glasgow Coma Scale<sup>10</sup> greater than 10, v) estimated total length of hospital stay greater than 14 days, vi) adequate English proficiency to participate in interviews as determined by managing speech pathologist or medical team. Exclusion criteria: i) uncorrected hearing or vision (for example hearing impairment without the use of hearing aids or vision impairment without the use of glasses), ii) medically unstable, iii) documented diagnosis of current untreated depression, documented diagnosis of dementia, previous aphasia or traumatic brain injury. The diagnosis of aphasia was confirmed for those who achieved a Western Aphasia Battery-Revised<sup>11</sup> Aphasia Quotient score less than 93.7. Eligible patients were approached by the site investigators for consent to be approached by the research team. The first author completed formal consent with all patient participants (see supplementary file for consent forms and procedures). A total of 9 patients were recruited, however 2 patients were withdrawn as they became medically unwell. Data collection was completed for 4 patients without aphasia and 3 patients with aphasia. See Figure 1. for the summary of patient screening and recruitment. Patient details and demographics are detailed in Table 2.

No staff or patients withdrew from participating in this study.

### **Data collection**

The first author, a female speech pathologist (Bachelor of Speech Pathology, Honours) and PhD student with seven years clinical experience working in the hospital setting and five years research experience, including conducting interviews and focus groups, completed all semi-structured interviews and focus groups. Staff were informed that the researchers wanted to investigate their perceptions of the hospital ward environment in regards to communication opportunities to inform the development of a Communication Enhanced Environment (see supplementary file for staff and volunteer information and consent forms). Patients were informed that the researchers wanted to explore how the hospital environment influenced patient activity (see supplementary file for patient information and consent forms).

1  
2  
3 All interviews and focus groups were conducted using interview and focus group  
4 guides (staff focus groups and interview guide Appendix B., patient interview guide  
5 Appendix C.) and were audio recorded. Field notes were completed by the first author  
6 during data collection. Seven staff focus groups were conducted with two to eight  
7 participants in each focus group. One-on-one interviews were conducted with two staff  
8 members. All staff focus groups were completed on the hospital site in various locations  
9 that were private and quiet. Six out of seven patient interviews were conducted in person  
10 during their inpatient admission in their hospital room, and one was completed over the  
11 phone (patient without aphasia) one day following discharge from hospital. All patient  
12 interviews were conducted within fifteen days post-stroke. Interview and focus groups were  
13 20-60 minutes long, often varying based on the number of participants. Supported  
14 conversation strategies<sup>12</sup> were used during interviews with patients with aphasia to  
15 facilitate their participation in the interview. One patient with aphasia had two family  
16 members present during the interview. During the interviews and focus groups, clarifying  
17 questions and paraphrasing participant comments were used to confirm and clarify their  
18 perspectives and insights.  
19  
20  
21  
22  
23  
24  
25  
26  
27  
28  
29  
30  
31  
32  
33  
34  
35  
36  
37  
38  
39  
40  
41  
42  
43  
44  
45  
46  
47  
48  
49  
50  
51  
52  
53  
54  
55  
56  
57  
58  
59  
60

1  
2  
3  
4  
5  
6  
7  
8  
9  
10  
11  
12  
13  
14  
15  
16  
17  
18  
19  
20  
21  
22  
23  
24  
25  
26  
27  
28  
29  
30  
31  
32  
33  
34  
35  
36  
37  
38  
39  
40  
41  
42  
43  
44  
45  
46  
47  
48  
49  
50  
51  
52  
53  
54  
55  
56  
57  
58  
59  
60

[Figure 1. inserted here]

For peer review only

Table 2. Patient characteristics

|                                                           | Group<br>(n=7) | PWA<br>(n = 3) | PWOA<br>(n = 4) |
|-----------------------------------------------------------|----------------|----------------|-----------------|
| Participants                                              |                |                |                 |
| Age (yr), mean (SD)                                       | 83 (7)         | 81 (5)         | 84 (8.10)       |
| Sex, n females                                            | 4              | 1              | 3               |
| Pre-morbid mobility, n needing aids                       | 1              | 1              | 0               |
| Pre-morbid living arrangement, n alone                    | 3              | 1              | 2               |
| Time since stroke (d), mean (SD)                          | 14 (5)         | 13 (7)         | 15 (5)          |
| Stroke severity (NIHSS <sup>13</sup> 0-42), mean (SD)     | 4 (3)          | 5 (4)          | 5 (3)           |
| Mild, n score < 8                                         | 5              | 2              | 3               |
| Moderate, n score 8-15                                    | 2              | 1              | 1               |
| Severe, n score > 15                                      | 0              | 0              | 0               |
| Mobility status at time of data collection                |                |                |                 |
| Independent +/- walking aid                               | 1              | 0              | 1               |
| Stand-by assistance                                       | 3              | 1              | 2               |
| 1-2 person assistance                                     | 2              | 1              | 1               |
| Hoist/wheelchair                                          | 1              | 1              | 0               |
| Cognition (MOCA <sup>14</sup> ), median (range)           | 18 (9-22)      | 16 (9-18)      | 20 (17-22)      |
| Aphasia severity, WAB-R <sup>11</sup> AQ mean, (SD)       |                | 77 (6.50)      |                 |
| Ward (d)                                                  |                |                |                 |
| Acute (%)                                                 | 4 (17)         | 4 (40)         | 0 (0)           |
| Rehabilitation (%)                                        | 19 (83)        | 6 (60)         | 13 (100)        |
| Average number of days in single room per participant (%) | 3.1 (96)       | 3 (90)         | 3.3 (100)       |

Notes: PWA= patient with aphasia; PWOA= patient without aphasia; NIHSS=National Institute of Health Stroke Scale<sup>13</sup>; MoCA= Montreal Cognitive Assessment<sup>14</sup>; WABAQ=Western Aphasia Battery-Revised<sup>11</sup> Aphasia Quotient score.



## Data analysis

Focus groups and interviews were transcribed verbatim. Responses to any leading questions were removed from the data set.<sup>15</sup>

The theoretical framework for this research was a qualitative description approach.<sup>16</sup> This approach involves describing patient experiences, with minimal interpretation of the data to minimise potential bias of the researchers.<sup>16</sup> Participant experiences were analysed using NVivo<sup>17</sup> computer software to manage the data. Data were grouped into themes according to content.<sup>16</sup> The first level of coding identified the broad content of the data then sub-categories were identified.<sup>16</sup> Single lines of data were not removed from their 'story' during data analysis to maintain the context and help ensure meaning was not lost or misinterpreted.<sup>16</sup> Ongoing critical review of the categories were conducted and themes were reviewed by a second researcher.<sup>16</sup> Staff were provided feedback on the findings.

## Results

The key themes from the focus group and interviews related to barriers and facilitators to communication, with sub-categories identified which related to hospital, staff and patient factors (Figure 2.).

1  
2  
3  
4  
5  
6  
7  
8  
9  
10  
11  
12  
13  
14  
15  
16  
17  
18  
19  
20  
21  
22  
23  
24  
25  
26  
27  
28  
29  
30  
31  
32  
33  
34  
35  
36  
37  
38  
39  
40  
41  
42  
43  
44  
45  
46  
47  
48  
49  
50  
51  
52  
53  
54  
55  
56  
57  
58  
59  
60

[Figure 2. inserted here]

For peer review only

## Barriers to Communication

### Hospital related factors

#### Private rooms reduce opportunities for social interaction

Staff and patients described the impact of single rooms which limited incidental socialisation with other patients and their visitors.

We used to co-locate our stroke patients [sic] and often using our shared rooms.

That's when people had more opportunities for interacting with one another.

(MedC1)

#### Mixed wards affect staff acquisition of specialist skills

Staff described their perception of the negative effect a mixed hospital ward had on the acquisition of stroke specific specialist skills.

Having a stroke specific ward... everybody on the ward would be trained...and that's the only thing they'd have to focus on rather than having lots of other patients with lots of medical conditions. (OT4)

#### Hospital environment does not encourage socialising

Staff talked about the physical hospital ward environment affecting social interaction as it contributed to a sterile atmosphere rather than one that promoted social activity. Staff also talked about the consequence of background noise and environmental distractors in large shared rooms on the acute ward which reduced their ability to communicate with patients with communication impairments.

My general feeling of rehab [rehabilitation] is that they come to their sessions and then they go back to their lonely dark room... I don't really see the rooms as a particularly happy, busy place where they are getting a lot out of being in there... the dining rooms... they're not a particularly pleasant place to be either. (PT2)

They [patients] can hear other people talking... there is [sic] a lot of voices going on which is going to impact on their understanding as well. (PT3)

#### Hospital policies restrict the development of communication-promoting ideas and initiatives

Hospital policies were perceived by staff as a barrier to communication, negatively influencing their ability to develop ideas and initiatives to increase patients' opportunities for social interaction. This included policies regarding leaving patients unattended in dining

1  
2  
3 areas without patient care assistants supervising them and requiring nurses to supervise  
4 patients if they are eating; and reported limitations around food related activities as a result  
5 of food hygiene policies and occupational health and safety.  
6  
7

8 It's just every time you try and do something you hit a barrier... you do try and think  
9 outside the box what more can you do for this patient and you get another hospital  
10 rule. (PT2)  
11  
12  
13

#### 14 **Power imbalance of staff and patients in hospital controls patients' ability to access** 15 **communication opportunities** 16

17 Staff and patients discussed the influence of the power imbalance for patients in  
18 hospital, and patient perceptions that they have to do what is expected in the hospital  
19 environment. This appeared to limit the patients' ability to freely engage and explore the  
20 environment resulting in patients retreating to their rooms and limiting their opportunities  
21 to engage in activities.  
22  
23  
24  
25

26 I think most males like to account for their time um and I felt like I haven't been able  
27 to do that and that's, that's the bit that I'm really, really lacking. (PWA2)  
28  
29

30 I was in the hospital so I think I had to stick into the room, to the rules. (PWOA2)

31 Very often when you're in a hospital you do what you think you're expected to do.  
32  
33  
34 (SP4)  
35

#### 36 **Task specific communication reduces patients' communication opportunities** 37

38 Staff talked about the nature of interactions with patients as often being driven by  
39 the patient's care, restricting opportunities for communication beyond this context.  
40

41 I know we aim to be very holistic... but very often care is very[sic] directed from a  
42 medical health care perspective (SP4)  
43  
44

#### 45 **Staff related factors** 46

#### 47 **Staff's perception of time pressures limiting opportunities for communication** 48

49 Both patients and staff perceived staff time pressures as a barrier negatively  
50 effecting communication on the wards. This may be the reflection of actual time pressures,  
51 or staff perceptions of their available time. Some staff reported that they felt interactions  
52 with patients with communication impairments required extra time which was challenging  
53 in a time pressured hospital environment. Time pressures were also perceived to restrict the  
54 staff's ability to facilitate opportunities for patients to socialise with other patients. For  
55  
56  
57  
58  
59  
60

1  
2  
3 example, nurses appeared to deprioritise transferring patients to the communal area for  
4 lunch in busier times.  
5

6  
7 If they're hoist patients it might not be as easy for staff to get them to the dining  
8 room, that wouldn't totally prevent someone from going, it would just depend on  
9 the time that people had on the day. (SW3)  
10  
11

### 12 **Staff and patient's underutilisation of available resources**

13  
14 Staff described the lack of accessible resources as a factor negatively affecting staff-  
15 patient communication. They described the need for resources when communicating with  
16 patients with aphasia and other communication impairments but felt unsure about what  
17 these were or how to access them. They also described a number of resources that they felt  
18 patients were not aware of and therefore did not utilise such as volunteer services that  
19 promote communication opportunities and facilitate patient access to outdoor areas.  
20  
21  
22  
23  
24

25  
26 I feel like I don't know where else to go. I don't know if other things that [sic] could  
27 help us, maybe there's things out there that I don't know about that would help us  
28 communicate with these patients. (PT2)  
29  
30

31  
32 There are all of these opportunities but I don't think a lot of the patients access them  
33 so it sounds like great communicative opportunities for them but the reality is that a  
34 lot of them are sitting in their rooms most of the times by themselves watching  
35 television and most of the interactions they have is with the nurses or just whoever  
36 comes in to see them. (SP4)  
37  
38  
39  
40

### 41 **Individual staff factors leading to restricted opportunities for communication**

42  
43 Staff described individual staff factors such as personality, values and attitudes  
44 influencing communication opportunities for patients, such as staff providing patients with  
45 opportunities for incidental social interaction during routine tasks.  
46  
47

48 Often if people need to go in and see the patient let's just say to take obs  
49 [observations] or to do a wash... they don't always use that opportunity as an  
50 opportunity to chat... there could be more opportunity to chat at those times whilst  
51 they are doing what they need to get done and you know that varies from person to  
52 person, personality as well and how busy people are, what else is going on. (SP3)  
53  
54  
55  
56

### 57 **Staff's perception their role does not include communication tasks**

1  
2  
3 Some staff perceived communication as a task separate from the responsibility of  
4 their role therefore limiting their facilitation of communication opportunities for patients.

5  
6 They [speech pathologists] do their bit and we do ours... we don't have time to  
7 practice speech with them because we really do have to get all of our jobs filled in  
8 the time and it's specifically rostered for us to do our work, not to help with  
9 someone else's. (RehabN1)

#### 14 **Lack of staff knowledge and skills resulting in unsuccessful communication interactions or** 15 **avoiding communication interactions**

16  
17 Staff described a lack of knowledge and skills in communicating with patients with  
18 communication impairments. Some staff reported feeling anxious about encouraging  
19 patients to communicate as communication breakdowns may cause stress and anxiety for  
20 the patient, and the staff member. Staff reported a lack of confidence in their ability to  
21 repair communication breakdowns which resulted in increased time pressures in their  
22 sessions, often leading them to avoid encouraging communication interactions within their  
23 treatment sessions.

24  
25 I find it challenging... knowing how the best way to communicate with that person  
26 [with aphasia]... then [they] become very frustrated and not have the tools  
27 themselves to communicate back to me and you would never want to leave  
28 someone in that space. So that's something that I struggle with. (SW2)

#### 30 **Patient related factors**

31  
32 Patient related factors reflected their functional and medical status, personality,  
33 mood and motivation, which were perceived by staff and patients to often act as a barrier to  
34 engaging in communication interactions during their hospital admission early after stroke.

#### 35 **Patients' functional and medical status limiting their ability to seek out and engage in** 36 **activities**

37  
38 Staff and patients perceived patients' medical status as a barrier to communication  
39 by limiting their ability to engage with their environment including independently seeking  
40 out activities and being able to utilise communal areas.

41  
42 If someone is bed bound, you know the interaction is very minimal... you often walk  
43 past and you see them alone in their room... you wonder what happens during those  
44 periods of time where they're just in their room and they don't have family. (OT2)  
45 Well, I can't do anything cos I can't go off by myself and do anything. (PWOA2)

### **Individual patient factors limiting opportunities for communication**

Staff described individual patient factors such as personality, mood and motivation communication opportunities for patients such as independent practice of communication therapy tasks, and social opportunities with patients and hospital staff.

We have to recognise some patients who have had strokes... they're fed up with having people poking and prodding them then have a volunteer and go "do you want to do your exercises for speech?" (VM)

They need a break after OT [the occupational therapist] has done a shower. If they don't get that break then the physio isn't going to be as good for them because they're so tired, so we also have to look at break times in between each sessions... (OTA1)

### **Facilitators to Communication**

#### **Hospital related factors**

#### **Shared rooms/co-location encourages incidental social interactions**

Staff talked about use of communal areas at other hospitals which facilitated socialisation and communication during non-therapy times and during group therapy. Staff described the importance of the use of communal areas given the large number of private rooms on the ward. Patients also described the need to be co-located to promote social interaction.

I think that, put the [sic] whole lot of people together and ah and they [sic] something collective, that's what human beings are put together for ... sitting around talking... over the proverbial cuppa. (PWA2)

#### **Visitors provide patients opportunities for socialisation**

Staff identified visitors as a facilitator to communication interaction for patients outside of therapy times during their inpatient admission.

Interaction with the family... it's not therapy based but it's their [patients'] opportunity to practice. (PT1)

#### **Volunteers facilitate opportunities for patients to engage in social activities**

Staff discussed the benefit of volunteers in facilitating opportunities for patients to engage in social interactions including programs involving therapy dogs, book loaning, hand massages, and taking patients off the ward.

1  
2  
3 If we see people that are lonely, are not getting visitors, there's many volunteers... to  
4 go and visit them and if they're well enough they can take them out... the volunteers,  
5 we do rely on them. (OTA1)  
6  
7  
8  
9

### 10 **Staff related factors**

#### 11 **Staff utilisation of resources promote communication exchange**

12 Staff identified access to resources such as chat books and alternative and  
13 augmentative communication boards often facilitated communication interactions with  
14 patients with communication impairments on the ward.  
15  
16  
17

18 Sometimes with the ... signs... "do you want to drink? some water?" or something, so  
19 they can just point because ... they want to say something and maybe the right  
20 words are not coming out... that also helps. (RehabN3)  
21  
22  
23  
24

#### 25 **Speech pathology support and education facilitates staff's use of communication** 26 **promoting strategies**

27 Staff reported support and education from speech pathology staff facilitated their  
28 ability to interact successfully with patients with aphasia.  
29  
30

31 I had a patient who had word finding difficulties... I just was observing the speechie  
32 [speech pathologist], she would just be like "no, what do you mean?" and he'll be  
33 like [pointing] and she'll be like "tell me what's the word"... it's something I could  
34 have just added to my session. (PT4)  
35  
36  
37  
38  
39

#### 40 **Staff knowledge and utilisation of communication strategies promotes communication** 41 **activities**

42 Staff and volunteers discussed the use of communication strategies and resources to  
43 facilitate communication on the ward for patients with a variety of communication  
44 impairments.  
45  
46  
47

48 We use communication boards, pictures, writing things down, talking slowly.  
49

50 (MedC2)

51 If they are having trouble, I will say to them "it's okay you don't need to hurry, that's  
52 fine". (V1)  
53  
54  
55

#### 56 **Individual staff factors promote communication opportunities for patients**



1  
2  
3 Staff and patients talked about how individual characteristics of staff, including  
4 rapport building and being friendly, facilitated communication for patients with  
5 communication difficulties.  
6  
7

8 Sometimes they [patients] look for that specific person... the more they get  
9 confident, the more they get relaxed, the more their speech enhances as well.  
10  
11

12 (RehabN3)  
13  
14  
15

## 16 Discussion

17 This study aimed to explore hospital staff, volunteers and patients' perceptions of  
18 barriers and facilitators to communication on an acute and a rehabilitation ward. A wide  
19 range of factors were perceived to act as potential barriers or facilitators to communication.  
20 Additionally, a number of factors influencing patient access to communication opportunities  
21 appeared to influence one another.  
22  
23

24 The co-location of patients in therapy spaces, dining areas or in shared rooms were  
25 perceived as facilitators to communication for patients, providing opportunities for  
26 incidental social interactions with other patients and their visitors. However, background  
27 noise in these shared spaces was also perceived to act as a barrier to their ability to engage  
28 in communication. Patient access to communal spaces was influenced by a number of  
29 factors including patients' sense of autonomy to freely explore the hospital ward  
30 environment, and their medical and mobility status, and staff's perception of their available  
31 time, which influenced staff's perception of whether they transferred patients to these  
32 spaces. Rosbergen et al<sup>18</sup> reported that in an acute stroke ward enriched environment  
33 communal mealtimes and group activities were perceived to facilitate social activity. The  
34 study by Rosbergen et al<sup>18</sup> found that staff reported perceptions that shared rooms limited  
35 staff and patients' ability to engage in private conversations, consistent with O'Halloran et  
36 al's<sup>19</sup> findings. It may be that access to both private and communal spaces available within  
37 the hospital environment play critical roles in regards to providing opportunities for social  
38 interactions with other patients and their visitors and opportunities for privacy when  
39 required.  
40  
41  
42  
43  
44  
45  
46  
47  
48  
49  
50  
51  
52  
53  
54  
55

56 The acute and rehabilitation wards had a large proportion of single rooms, which  
57 could have been considered the result of this study being conducted at a private hospital.  
58 However, there has been a perceived trend towards increased proportions of single rooms  
59  
60

1  
2  
3 in newly built public hospitals to promote infection control and patient privacy which may  
4 have a detrimental effect on communication.<sup>20,21</sup> The predominance of single rooms and  
5 limited opportunities to access shared spaces may have increased the effect of other  
6 barriers on communication opportunities for patients. For example, a patient with poor  
7 autonomy may be more likely to remain alone in their single room when they are not  
8 attending therapy, as they perceive they are not 'allowed' to freely explore the hospital  
9 environment. This may reduce the likelihood of the individual independently seeking out  
10 social interactions beyond their room. If they also have reduced mobility, they may be more  
11 reliant on staff to facilitate transfers to communal spaces which may be impacted by staff  
12 time constraints. The patient's functional status and levels of fatigue may also limit their  
13 ability to initiate and engage in activities while they are in their room. Therefore, the  
14 combined effect of these barriers may significantly limit this patient's communication  
15 opportunities.

16  
17  
18  
19  
20  
21  
22  
23  
24  
25  
26  
27 These communication barriers may be mitigated by having scheduled rest periods,  
28 and periods allocated to encouraging visitors to provide opportunities for communication  
29 and socialisation within their room, and facilitate patient access to shared spaces, such as  
30 helping mobilise wheelchair users into communal dining areas or education to patients that  
31 they are allowed to explore the hospital ward environment. Rosbergen et al<sup>18</sup> identified  
32 patient and family autonomy to initiate and direct activity as a factor enriching the acute  
33 ward environment. Therefore, increasing patient autonomy within this setting may facilitate  
34 their ability to seek out interactions within the environment and increase engagement in  
35 communication activity, which may then reduce the effect of being in a single room with  
36 reduced mobility and time poor staff.

37  
38  
39  
40  
41  
42  
43  
44  
45 A potential lack of opportunities to access social interactions with other patients  
46 means staff, including volunteers, and visitors may become the main communication  
47 partner for patients. Godecke et al's<sup>6</sup> observation study found that nurses are the most  
48 frequent communication partner for patients following stroke with aphasia, after their  
49 family members, therefore patient-staff interactions may play a significant role for those  
50 patients with minimal or no visitors. It is interesting to note that this study recruited a  
51 limited number of acute nurses in comparison to rehabilitation nurses. This could be  
52 interpreted as a reflection of differences in nurses' capacity for additional activities within  
53 the demands and time restrictions of the acute ward context in comparison to the  
54  
55  
56  
57  
58  
59  
60

1  
2  
3 rehabilitation ward context. Within the current study, communication between staff and  
4 patients appeared to be dependent on a number of factors including staff perception of  
5 their role, their knowledge and skills in facilitating communication, their values and  
6 attitudes towards communication and whether supporting language and communication for  
7 patients with aphasia is part of their 'role', their willingness to be flexible with their time,  
8 and their knowledge of and access to resources which may be used to facilitate  
9 communication. This also highlights the potential impact of the perceived power imbalance  
10 between staff and patients and the significance of interactions that are task directed. Hersh  
11 et al<sup>21</sup> reported patients with aphasia felt disempowered in communicative interactions  
12 with nurses. Nurses often talked to the task and controlled interactions with  
13 patients.<sup>22,23</sup> This highlights the need for communication partner training which may provide  
14 staff with the knowledge and skills required to support effective communication with  
15 patients with aphasia.<sup>24</sup> Implementation strategies will need to be considered to promote  
16 behaviour change as well as the uptake and maintenance of training including involvement  
17 of management and ward champions, and ensuring trained communication strategies are  
18 easy to learn, apply and audit in order to be applicable in this busy context.<sup>25</sup>

19  
20  
21  
22  
23  
24  
25  
26  
27  
28  
29  
30  
31  
32  
33  
34  
35  
36  
37  
38  
39  
40  
41  
42  
43  
44  
45  
46  
47  
48  
49  
50  
51  
52  
53  
54  
55  
56  
57  
58  
59  
60

Time pressure was perceived as a major barrier to communication impacting on staff's ability to support successful communication within their interactions with patients and facilitate patients' opportunities to engage in interactions in social or communal areas. Time constraints have been reported to limit communicative opportunities between patients following stroke and nurses.<sup>26</sup> Ball et al<sup>26</sup> found that 86% of surveyed nurses reported one or more activities had been "left undone" in their last shift as a result of lack of time. The study found that activities most likely to be missed by nurses as a result of time constraints were comforting and talking to patients (66%) and patient education (52%).<sup>26</sup> This has also been identified by patients who "did not like to bother the busy nurse".<sup>27</sup> Time limitations and pressures on the wards may be facilitated by developing staff knowledge of and skills in using communication promoting strategies. Effective and efficient nurse patient communication as a result of nurse training has been found to save time, reduce frustration and reduce the burden associated with caring for patients following stroke with aphasia.<sup>28</sup> Additionally, time limitations reported by staff may lend to an argument for additional nursing allocation for patients with communication impairments.

1  
2  
3 This study included a small number of medical and nursing staff in comparison to  
4 compared to allied health staff which may be reflected in the reported results. This study  
5 also involved a small number of patients and a broader range of perspectives may have  
6 been expressed with a larger number of participants. This study was conducted at a private  
7 hospital involving a mixed acute and a mixed rehabilitation ward, and a relatively  
8 homogenous groups of participants linguistically and ethnically, therefore these results  
9 reflect this context and may not be directly generalisable to hospitals in the public sector,  
10 nor did they explore cultural factors contributing to communication.  
11  
12  
13  
14  
15  
16  
17

### 18 **Conclusions**

19 The barriers and facilitators to communication appear to be interconnected and  
20 likely to influence one another, suggesting that the level of communication access may vary  
21 from patient to patient within the same setting. Results of this study highlight a number of  
22 practical changes that could be implemented to promote communication opportunities for  
23 patients admitted to hospital early after stroke. However, implementation of behaviour and  
24 cultural change strategies may be pertinent to promote meaningful and sustainable change  
25 within the hospital setting. Consideration of areas for co-location for patients such as  
26 therapy spaces, dining areas or shared rooms as well as access to private spaces may  
27 potentially address the need for social opportunities with other patients as well as access to  
28 privacy when required. The promotion of visitors attending the wards may facilitate  
29 communication opportunities for patients between therapy times by providing socialisation  
30 in patients' rooms as well as facilitating and advocating for patient access to communal  
31 areas. This has the potential to mitigate the effect of social isolation in single rooms, staff  
32 time restraints and limitations as a result of patients' medical status. Strategies to promote  
33 patient autonomy in hospital may promote their ability to freely explore the environment  
34 beyond their room may help address the power imbalance that can occur between patients  
35 and hospital staff. Additionally, health staff and volunteer education in using  
36 communication promoting strategies may increase opportunities for interactions between  
37 patients, and staff or volunteers and promote communication exchange within those  
38 interactions. These factors will be explored in a Communication Enhanced Environment,  
39 which aims to increase patients' opportunities to engage in language activities during early  
40 stroke recovery in hospital.  
41  
42  
43  
44  
45  
46  
47  
48  
49  
50  
51  
52  
53  
54  
55  
56  
57  
58  
59

### 60 **Acknowledgements**

1  
2  
3 The authors would like to thank the hospital and staff for supporting this study and  
4 assisting in participant recruitment. We would also like to thank all the participants in this  
5 study for sharing their experiences and insights.  
6  
7

### 8 9 **Author contributions**

10  
11 SD, EG, NC, DH, HJ and EA designed the study and the protocol. EG reviewed the final  
12 copies of the protocol documents. SD conducted the semi-structured interviews and focus  
13 groups. SD performed data analysis. DH conducted the critical review of the categories and  
14 review of themes. SD, EG, NC, DH, HJ and EA contributed to the manuscript and approved  
15 the manuscript.  
16  
17

### 18 19 **Competing interests statement**

20  
21 This research was funded by The Hollywood Private Hospital Research Grant (RF087).  
22 SD received an Australian Post Graduate Award Scholarship for the first year of this study  
23 and received an ECU Research Travel Grant. The authors have no other competing interests  
24 to declare.  
25  
26

### 27 28 **Funding statement**

29  
30 This work was supported by the Hollywood Private Hospital Research Foundation  
31 grant number RF087. SD received an Australian Post Graduate Award Scholarship for the  
32 first year of this study and received an ECU Research Travel Grant.  
33  
34

### 35 36 **Data sharing statement**

37  
38 Patient interview and staff focus group data are stored in the Edith Cowan University data  
39 storage repository. This data will be available in a de-identified format by request through  
40 the first author ORCID <https://orcid.org/0000-0001-6221-3229>. The availability and use of  
41 the data are governed by Edith Cowan University Research Ethics.  
42  
43

### 44 45 **Figures**

46  
47 Figure 1. Summary of patient screening and recruitment.  
48

49  
50 Figure 2. Summary of themes and subthemes of staff and patient perceptions to barriers  
51 and facilitators to patient communication in hospital.  
52  
53  
54  
55  
56  
57  
58  
59  
60

## References

1. Ali M, Brady M, Ali M, et al. Predictors of post-stroke aphasia recovery: a systematic review-informed individual participant data (IPD) meta-analysis. *Stroke*; 2021 (*In Press*).
2. Robey, RR. A meta-analysis of clinical outcomes in the treatment of aphasia. *J Speech Lang Hear Res.* 1998;41(1): 172-187.
3. Fazio S, Stocking J, Kuhn B, et al. How much do hospitalized adults move? A systematic review and meta-analysis. *Appl Nurs Res.* 2019; <https://doi.org/10.1016/j.apnr.2019.151189>
4. Kevdzija M & Marquardt G. Stroke patients' nonscheduled activity during inpatient rehabilitation and its relationship with architectural layout: A multicenter shadowing study; *Top Stroke Rehabil.* 2021; <https://doi.org/10.1080/10749357.2020.1871281>
5. Janssen H, Ada L, Bernhardt J, et al. Physical, cognitive and social activity levels of stroke patients undergoing rehabilitation within a mixed rehabilitation unit. *Clin Rehabil.* 2014;28: 91–101.
6. Godecke E, Armstrong E, Hersh D, et al. Missed Opportunities: Communicative interactions in early stroke recovery. Conference presentation at Stroke Society of Australasia Annual Scientific Meeting; 2014; Hamilton Island, Queensland.
7. Eng X, Brauer SG, Kuys SS, et al. Factors affecting the ability of the stroke survivor to drive their own recovery outside of therapy during inpatient stroke rehabilitation. *Stroke Research and Treatment.* 2014: 1-8.
8. Kenah K, Bernhardt J, Cumming T, et al. Boredom in patients with acquired brain injuries during rehabilitation: A scoping review, *Disabil & Rehab.* 2018;40(22): 2713-22.
9. Tong A, Sainsbury, Craig J. Consolidated criteria for reporting qualitative research (COREQ): A 32-item checklist for interviews and focus groups. *International Journal for Quality in Health Care.* 2007;19(6): 349-357.
10. Teasdale G, Jennett B. Assessment of coma and impaired consciousness. A practical scale. *Lancet.* 1974;2(7872): 81–4.
11. Kertesz A. *Western Aphasia Battery- Revised.* San Antonio, TX, Harcourt Assessment; 2006.
12. Kagan, A. Supported conversation for adults with aphasia: methods and resources for training conversation partners. *Aphasiology.* 1998;12(9): 816-830.

- 1  
2  
3 13. NIH stroke scale [Internet]. Bethesda, Md, National Institute of Neurological Disorders  
4 and Stroke (U.S.). 2011 [cited 2016 Feb 10]. Available from  
5  
6 [https://www.ninds.nih.gov/sites/default/files/NIH\\_Stroke\\_Scale.pdf](https://www.ninds.nih.gov/sites/default/files/NIH_Stroke_Scale.pdf)  
7
- 8 14. Nasreddine ZS, Phillips NA, Bédirian V, et al. The Montreal Cognitive Assessment, MoCA:  
9 a brief screening tool for mild cognitive impairment. *J Am Geriatr Soc*. 2005;53(4): 695-9.  
10
- 11 15. Milne J, Oberle K. Enhancing rigour in qualitative description: A case study. *J Wound*  
12 *Ostomy Continence Nurs*. 2005;32(6): 413-420.  
13
- 14 16. Neergaard MA, Olesen F, Anderson RS, et al. Qualitative description- the poor cousin of  
15 health research. *BMC Med Res Methodol*. 2009;9(1): 52-7.  
16
- 17 17. NVivo qualitative data analysis software; QSR International Pty Ltd. Version 12, 2018.  
18
- 19 18. Rosbergen IC, Brauer SG, Fitzhenry S, et al. Qualitative investigation if the perceptions  
20 and experiences of nursing and allied health professionals involved in the implementation of  
21 an enriched environment in and Australian acute stroke unit. *BMJ Open*. 2017 Dec 21; 7(12):  
22 e018226.  
23
- 24 19. O'Halloran R, Grohn B, Worrall L. Environmental factors that influence communication  
25 for patients with a communication disability in acute hospital stroke units: A qualitative  
26 metasynthesis. *Arch Phys Med Rehabil*. 2012;93(1): S77-S85.  
27
- 28 20. Ana°ker A, von Koch L, Heylighen A, et al. "It's lonely: Patients' experiences of the  
29 physical environment at a newly built stroke unit. *Health Environments Research & Design*  
30 *Journal*. 2017;12(3): 141-52.  
31
- 32 21. Shannon MM, Lipson-Smith R, Elf M, et al. Bringing the single versus multi-patient room  
33 debate to vulnerable patient populations: A systematic review of the impact of room types  
34 on hospitalized older people and people with neurological disorders. *Intelligent Buildings*  
35 *International*. 2018; <https://doi.org/10.1080/17508975.2018.154833>  
36
- 37 22. Hersh D, Godecke E, Armstrong E, et al. "Ward talk": Nurses' interaction with people  
38 with and without aphasia in the very early period poststroke. *Aphasiology*. 2016;30(5): 609-  
39 628.  
40
- 41 23. Costa A. Doing nothing? An ethnography of patients' (In)activity on an acute stroke unit.  
42 2021. *Health*; doi: 10.1177/1363459320969784  
43
- 44 24. Simmons-Mackie N, Raymer A, Armstrong E, et al. Communication partner training in  
45 aphasia: A systematic review. *Arch Phys Med Rehabil*. 2010;91: 1814-1837.  
46  
47  
48  
49  
50  
51  
52  
53  
54  
55  
56  
57  
58  
59  
60

- 1  
2  
3 25. Shrubsole K, Worrall L, Power E. Closing the evidence-practice gaps in aphasia  
4 management; Are we there yet? Where has a decade of implementation research taken us?  
5 A review and guide for clinicians. *Aphasiology*. 2019;33(8): 970-95.  
6  
7  
8 26. Ball JE, Murrells T, Rafferty AM, et al. 'Care left undone' during nursing shifts:  
9 Associations with workload and perceived quality of care. *BMJ Qual Saf*, 2014;23(2): 116–  
10 125.  
11  
12 27. McCabe C. Nurse–patient communication: An exploration of patients' experiences. *J Clin*  
13 *Nurs*. 2004;13: 41–49.  
14  
15 28. McGilton K, Sorin-Peters R, Sidani S, et al. Focus on communication: Increasing the  
16 opportunity for successful staff–patient interactions. *Int J Older People Nurs*. 2009;6: 13–24.  
17  
18  
19  
20  
21  
22  
23  
24  
25  
26  
27  
28  
29  
30  
31  
32  
33  
34  
35  
36  
37  
38  
39  
40  
41  
42  
43  
44  
45  
46  
47  
48  
49  
50  
51  
52  
53  
54  
55  
56  
57  
58  
59  
60





Figure 1. Summary of patient screening and recruitment



Figure 2. Summary of themes and subthemes of staff and patient perceptions to barriers and facilitators to patient communication in hospital.

## Appendix A.

Consolidated criteria for reporting qualitative studies (COREQ)<sup>9</sup>: 32-item checklist

| No Item                                     | Guide questions/description                                                                                                               | Location within paper                                                   |
|---------------------------------------------|-------------------------------------------------------------------------------------------------------------------------------------------|-------------------------------------------------------------------------|
| Domain 1: Research team and reflexivity     |                                                                                                                                           |                                                                         |
| Personal Characteristics                    |                                                                                                                                           |                                                                         |
| 1. Interviewer/facilitator                  | Which author/s conducted the interview or focus group?                                                                                    | Page 10                                                                 |
| 2. Credentials                              | What were the researcher's credentials? E.g. PhD, MD                                                                                      | Page 10                                                                 |
| 3. Occupation                               | What was their occupation at the time of the study?                                                                                       | Page 10                                                                 |
| 4. Gender                                   | Was the researcher male or female?                                                                                                        | Page 10                                                                 |
| 5. Experience and training                  | What experience or training did the researcher have?                                                                                      | Page 10                                                                 |
| Relationship with participants              |                                                                                                                                           |                                                                         |
| 6. Relationship established                 | Was a relationship established prior to study commencement?                                                                               | Page 7                                                                  |
| 7. Participant knowledge of the interviewer | What did the participants know about the researcher? e.g. personal goals, reasons for doing the research                                  | Supplementary files, participant information and consent forms, page 10 |
| 8. Interviewer characteristics              | What characteristics were reported about the interviewer/facilitator? e.g. Bias, assumptions, reasons and interests in the research topic | Page 10                                                                 |
| Domain 2: study design                      |                                                                                                                                           |                                                                         |
| Theoretical framework                       |                                                                                                                                           |                                                                         |

|                                          |                                                                                                                                                          |                        |
|------------------------------------------|----------------------------------------------------------------------------------------------------------------------------------------------------------|------------------------|
| 9. Methodological orientation and Theory | What methodological orientation was stated to underpin the study? e.g. grounded theory, discourse analysis, ethnography, phenomenology, content analysis | Page 13                |
| Participant selection                    |                                                                                                                                                          |                        |
| 10. Sampling                             | How were participants selected? e.g. purposive, convenience, consecutive, snowball                                                                       | Page 8, 10             |
| 11. Method of approach                   | How were participants approached? e.g. face-to-face, telephone, mail, email                                                                              | Page 8, 10             |
| 12. Sample size                          | How many participants were in the study?                                                                                                                 | Page 8, 10             |
| 13. Non-participation                    | How many people refused to participate or dropped out? Reasons?                                                                                          | Figure 1, page 8       |
| 14. Setting                              | Setting of data collection Where was the data collected? e.g. home, clinic, workplace                                                                    | Page 7-8               |
| 15. Presence of non-participants         | Was anyone else present besides the participants and researchers?                                                                                        | Page 11                |
| 16. Description of sample                | What are the important characteristics of the sample? e.g. demographic data, date                                                                        | Table 2, page 12       |
| Data collection                          |                                                                                                                                                          |                        |
| 17. Interview guide                      | Were questions, prompts, guides provided by the authors? Was it pilot tested?                                                                            | Appendix B, Appendix C |
| 18. Repeat interviews                    | Were repeat interviews carried out? If yes, how many?                                                                                                    | NA                     |
| 19. Audio/visual recording               | Did the research use audio or visual recording to collect the data?                                                                                      | Page 10                |
| 20. Field notes                          | Were field notes made during and/or after the interview or focus group?                                                                                  | Page 10                |
| 21. Duration                             | What was the duration of the interviews or focus group?                                                                                                  | Page 11                |

|                                    |                                                                                                                                   |            |
|------------------------------------|-----------------------------------------------------------------------------------------------------------------------------------|------------|
| 22. Data saturation                | Was data saturation discussed?                                                                                                    | Page 5     |
| 23. Transcripts returned           | Were transcripts returned to participants for comment and/or correction?                                                          | No         |
| Domain 3: analysis and findings    |                                                                                                                                   |            |
| Data analysis                      |                                                                                                                                   |            |
| 24. Number of data coders          | How many data coders coded the data?                                                                                              | Page 13    |
| 25. Description of the coding tree | Did authors provide a description of the coding tree?                                                                             | Figure 2   |
| 26. Derivation of themes           | Were themes identified in advance or derived from the data?                                                                       | Page 13    |
| 27. Software                       | What software, if applicable, was used to manage the data?                                                                        | Page 13    |
| 28. Participant checking           | Did participants provide feedback on the findings?                                                                                | Page 13    |
| Reporting                          |                                                                                                                                   |            |
| 29. Quotations presented           | Were participant quotations presented to illustrate the themes / findings? Was each quotation identified? e.g. participant number | Page 14-20 |
| 30. Data and findings consistent   | Was there consistency between the data presented and the findings?                                                                | Page 14-20 |
| 31. Clarity of major themes        | Were major themes clearly presented in the findings?                                                                              | Figure 2   |
| 32. Clarity of minor themes        | Is there a description of diverse cases or discussion of minor themes?                                                            | Page 14-20 |

## Appendix B.

### Investigating Communication Enhanced Environments after stroke: Staff focus group guide

What kind of language activities or language tasks do patients following stroke currently participate in on the ward?

What kind of language activities or language tasks would you like see patients following stroke have access to on the wards?

Describe your experience of communicating with patients following stroke at the moment.

Can you tell me about anything that facilitates your ability to communicate with patients following stroke on the ward?

Can you tell me about any barriers you experience that impact your ability to communicate with patients following stroke on the ward?

What changes would you like to see to enhance communication between staff and patients following stroke on the ward?

What changes would you like to see to enhance communication between visitors and patients following stroke on the ward?

How could we enhance or optimise communication and language tasks and activities for patients following stroke on the ward?

What do you think a communication and language enhanced stroke ward environment might look like?

**Appendix C.****Investigating Communication Enhanced Environments after stroke: Patient interview guide**

Tell me about what kind of activities you do while you are here (in hospital).

Describe your experience of communicating with people on the ward.

What makes it easier to communicate with people on the ward?

What makes it hard to communicate with people on the ward?

What can we do to make communicating with people easier?

1 **Investigating a Communication Enhanced Environment (CEE) model early after stroke: A before-after non-**  
2 **randomised controlled pilot study.**

3  
4 **Study protocol version 1 19.05.20**

5  
6  
7 **Edith Cowan University**

8  
9  
10  
11 **Chief Investigator**

12 Sarah D'Souza

13 PhD student

14 School of Psychology and Social Sciences

15 Edith Cowan University

16 270 Joondalup Drive,

17 JOONDALUP WA 6027

18 s.dsouza@ecu.edu.au

19  
20  
21  
22  
23  
24  
25  
26  
27  
28  
29  
30  
31 **Co-Investigators**

32 Associate Professor Erin Godecke, Edith Cowan University

33 Associate Professor Natalie Ciccone, Edith Cowan University

34 Dr Heidi Janssen, Hunter New England Local Health District, NSW Health

35 Associate Professor Deborah Hersh, Edith Cowan University

36 Professor Elizabeth Armstrong, Edith Cowan University

37  
38  
39  
40  
41  
42  
43  
44  
45  
46  
47 **Site Investigators**

48 Claire Tucak, Hollywood Private Hospital

49 Sarah Wynn, Hollywood Private Hospital

50 Millie Gallan-Dwyer, Hollywood Private Hospital



## Table of Contents

|    |                                                           |           |
|----|-----------------------------------------------------------|-----------|
| 1  |                                                           |           |
| 2  |                                                           |           |
| 3  | <b>1. Abbreviations and Definitions of Terms.....</b>     | <b>3</b>  |
| 4  |                                                           |           |
| 5  | <b>2. Protocol Synopsis.....</b>                          | <b>4</b>  |
| 6  |                                                           |           |
| 7  | <b>3. Introduction.....</b>                               | <b>7</b>  |
| 8  |                                                           |           |
| 9  | <b>4. Objectives.....</b>                                 | <b>7</b>  |
| 10 |                                                           |           |
| 11 | <b>5. Study Design.....</b>                               | <b>7</b>  |
| 12 |                                                           |           |
| 13 | <b>6. Study Population.....</b>                           | <b>7</b>  |
| 14 |                                                           |           |
| 15 | <b>7. Study Assessment and Procedures.....</b>            | <b>8</b>  |
| 16 |                                                           |           |
| 17 | <b>8. Study Treatment.....</b>                            | <b>8</b>  |
| 18 |                                                           |           |
| 19 | <b>9. Participant Completion and Discontinuation.....</b> | <b>9</b>  |
| 20 |                                                           |           |
| 21 | <b>10. Data Analysis.....</b>                             | <b>9</b>  |
| 22 |                                                           |           |
| 23 | <b>11. Data Management.....</b>                           | <b>9</b>  |
| 24 |                                                           |           |
| 25 | <b>12. Study Report.....</b>                              | <b>10</b> |
| 26 |                                                           |           |
| 27 | <b>13. Administration Procedures.....</b>                 | <b>10</b> |
| 28 |                                                           |           |
| 29 | <b>14. References.....</b>                                | <b>11</b> |
| 30 |                                                           |           |
| 31 | <b>Appendix A. Behavioural mapping tool.....</b>          | <b>12</b> |
| 32 |                                                           |           |
| 33 | <b>Appendix B. Patient interview guide.....</b>           | <b>13</b> |
| 34 |                                                           |           |
| 35 | <b>Appendix C. Staff focus group guide.....</b>           | <b>14</b> |
| 36 |                                                           |           |
| 37 |                                                           |           |
| 38 |                                                           |           |
| 39 |                                                           |           |
| 40 |                                                           |           |
| 41 |                                                           |           |
| 42 |                                                           |           |
| 43 |                                                           |           |
| 44 |                                                           |           |
| 45 |                                                           |           |
| 46 |                                                           |           |
| 47 |                                                           |           |
| 48 |                                                           |           |
| 49 |                                                           |           |
| 50 |                                                           |           |
| 51 |                                                           |           |
| 52 |                                                           |           |
| 53 |                                                           |           |
| 54 |                                                           |           |
| 55 |                                                           |           |
| 56 |                                                           |           |
| 57 |                                                           |           |
| 58 |                                                           |           |
| 59 |                                                           |           |
| 60 |                                                           |           |

# 1 Abbreviations and Definitions of Terms

**CEE model:** Communication Enhanced Environment model, an adapted model of an Enriched Environment, an environment that provides patients following stroke opportunities to engage in language activities during inpatient rehabilitation.

**PWA:** Patients following stroke with aphasia.

**PWOA:** Patients following stroke without aphasia.

**Language activities:** Language tasks that consist of solitary or interactive language activities.

**Solitary language activities:** Activities that may promote aphasia recovery such as reading, writing, listening to the radio, and the use of iPad applications.

**Interactive language activities:** activities which are based in communicative interactions that involve an exchange of information with a communication partner involving talking, gesture and/or facial expression, reading, writing or drawing to communicate.

**EE:** Enriched Environment, an environment that promotes physical, cognitive and social activity.

## 2. Protocol Synopsis

|                            |                                                                                                                                                                                                                                                                                                                                                                                                                                                                                                                                                                                                                                                                                                                                                                                                                                                                                                                                                                                                                                                                                                                                                                                                                                                                                                                                                                                                                                                                                                                                                                                                                                                                                                                                                                                                                                                                                                                                                                                                                                                                                                                                                                                                                                                                                                                                                                                                                                                                                                                                                                                                                                                                                                                                                                                                                                                                                                                                                                                                                                                                                                                                        |
|----------------------------|----------------------------------------------------------------------------------------------------------------------------------------------------------------------------------------------------------------------------------------------------------------------------------------------------------------------------------------------------------------------------------------------------------------------------------------------------------------------------------------------------------------------------------------------------------------------------------------------------------------------------------------------------------------------------------------------------------------------------------------------------------------------------------------------------------------------------------------------------------------------------------------------------------------------------------------------------------------------------------------------------------------------------------------------------------------------------------------------------------------------------------------------------------------------------------------------------------------------------------------------------------------------------------------------------------------------------------------------------------------------------------------------------------------------------------------------------------------------------------------------------------------------------------------------------------------------------------------------------------------------------------------------------------------------------------------------------------------------------------------------------------------------------------------------------------------------------------------------------------------------------------------------------------------------------------------------------------------------------------------------------------------------------------------------------------------------------------------------------------------------------------------------------------------------------------------------------------------------------------------------------------------------------------------------------------------------------------------------------------------------------------------------------------------------------------------------------------------------------------------------------------------------------------------------------------------------------------------------------------------------------------------------------------------------------------------------------------------------------------------------------------------------------------------------------------------------------------------------------------------------------------------------------------------------------------------------------------------------------------------------------------------------------------------------------------------------------------------------------------------------------------------|
| <b>Study Title:</b>        | Investigating a Communication Enhanced Environment model on acute and rehabilitation wards early after stroke: A before-after non-randomised controlled pilot study                                                                                                                                                                                                                                                                                                                                                                                                                                                                                                                                                                                                                                                                                                                                                                                                                                                                                                                                                                                                                                                                                                                                                                                                                                                                                                                                                                                                                                                                                                                                                                                                                                                                                                                                                                                                                                                                                                                                                                                                                                                                                                                                                                                                                                                                                                                                                                                                                                                                                                                                                                                                                                                                                                                                                                                                                                                                                                                                                                    |
| <b>Study type:</b>         | Interventional                                                                                                                                                                                                                                                                                                                                                                                                                                                                                                                                                                                                                                                                                                                                                                                                                                                                                                                                                                                                                                                                                                                                                                                                                                                                                                                                                                                                                                                                                                                                                                                                                                                                                                                                                                                                                                                                                                                                                                                                                                                                                                                                                                                                                                                                                                                                                                                                                                                                                                                                                                                                                                                                                                                                                                                                                                                                                                                                                                                                                                                                                                                         |
| <b>Study Intervention:</b> | <p>A Communication Enhanced Environment (CEE) model will be developed from pre-intervention observations of inpatient language activities and investigations of barriers and facilitators to communication together through focus groups with hospital staff and interviews with patients on the acute and rehabilitation wards.</p> <p>Sixteen patients following stroke will be recruited in this prospective before-after non-randomised controlled pilot study set in an acute and a rehabilitation ward of a metropolitan private hospital. The study includes: i) The baseline phase which involves observation of patients following stroke (n=8, 4 patients with aphasia (PWA) and 4 patients without aphasia (PWOA)); the collection of qualitative data through focus groups and semi-structured interviews to determine patient and staff perceived barriers and facilitators to communication; ii) the implementation phase where a CEE model will be developed and embedded in usual care; iii) the post-implementation phase which will involve repeated baseline data collection on a different cohort of patients (n=8, 4 PWA and 4 PWOA) to determine i) how solitary and interactive language activity levels changed following implementation of the CEE model, ii) the differences post CEE implementation in hospital staff's use of communication promoting strategies when interacting with patients, iii) the differences post CEE implementation in staff and patient perceptions of the barriers and facilitators to inpatient language activities.</p> <p>The CEE model will include the provision of:</p> <ul style="list-style-type: none"> <li>i) CEE model equipment, for example reading materials such as books and magazines, and access and encouragement to reside in a communal dining area;</li> <li>ii) CEE model education, support and training for staff with the aim to develop the ability to facilitate language activities for patients after stroke. The training program will be guided by research evidence, expert opinion and baseline data. Staff will complete a questionnaire pre and post training to determine changes in their knowledge, skills and attitudes regarding communication and aphasia.</li> </ul> <p><b>Control treatment:</b> Patients following stroke with and without aphasia will be observed and video recorded over two weekdays and one weekend day pre (n=8) and post (n=8) implementation of a CEE model. Behavioural mapping will record patient interactive and solitary language activity observed within the first minute of 5-minute intervals in 4-hour time periods between 7am and 7pm. <i>Solitary language activities</i> are activities that may promote aphasia recovery such as reading, writing, listening to the radio, and the use of iPad applications. <i>Interactive language activities</i> are activities which are based in communicative interactions that involve an exchange of information with a communication partner involving talking, gesture and/or facial expression, reading, writing or drawing to communicate.</p> |

|                                        |                                                                                                                                                                                                                                                                                                                                                                                                                                                                                                                                                                                                                                                                                                                                                                                                                                                                                                                                                                                                       |
|----------------------------------------|-------------------------------------------------------------------------------------------------------------------------------------------------------------------------------------------------------------------------------------------------------------------------------------------------------------------------------------------------------------------------------------------------------------------------------------------------------------------------------------------------------------------------------------------------------------------------------------------------------------------------------------------------------------------------------------------------------------------------------------------------------------------------------------------------------------------------------------------------------------------------------------------------------------------------------------------------------------------------------------------------------|
| <p><b>Objectives of the Study:</b></p> | <p>This study aims to investigate a CEE model on an acute and rehabilitation ward and if stakeholders perceive a CEE model as valuable by addressing the following research questions:</p> <ul style="list-style-type: none"> <li>- Does a CEE model increase the amount of time PWA and PWOA spend in participating in solitary and interactive language activities on acute and rehabilitation wards during the early post-stroke period?</li> <li>- What are the differences in patients' experience of communication in a CEE model compared to patients' experience of communication in a standard environment on in-patient acute and rehabilitation wards?</li> <li>- What is the experience of implementing a CEE model for staff working with PWA and PWOA within in-patient acute and rehabilitation wards?</li> <li>- Do staffs' perceptions of their knowledge of, skills with, and attitude towards communication and aphasia change following implementation of a CEE model?</li> </ul> |
| <p><b>Number of Centres:</b></p>       | <p>1</p>                                                                                                                                                                                                                                                                                                                                                                                                                                                                                                                                                                                                                                                                                                                                                                                                                                                                                                                                                                                              |
| <p><b>Study duration:</b></p>          | <p>5 years</p>                                                                                                                                                                                                                                                                                                                                                                                                                                                                                                                                                                                                                                                                                                                                                                                                                                                                                                                                                                                        |
| <p><b>Study Hypothesis:</b></p>        | <p>A CEE model will increase patient engagement in solitary and interactive language activities and improve staff and patient experiences of communication compared to a standard ward environment.</p>                                                                                                                                                                                                                                                                                                                                                                                                                                                                                                                                                                                                                                                                                                                                                                                               |
| <p><b>Primary outcomes:</b></p>        | <p>The primary outcome is the change in the proportion of solitary and interactive language activities as a percentage of total observed activity after the implementation of the CEE model.</p> <p>Timepoint: Patient observations completed within 21 days post stroke.</p>                                                                                                                                                                                                                                                                                                                                                                                                                                                                                                                                                                                                                                                                                                                         |
| <p><b>Secondary outcomes:</b></p>      | <p>The differences post CEE model implementation in staff and patient perceptions of the barriers and facilitators to inpatient language activities.</p> <p>Timepoint: Within 18 months of embedding the CEE model.</p>                                                                                                                                                                                                                                                                                                                                                                                                                                                                                                                                                                                                                                                                                                                                                                               |
| <p><b>Study design:</b></p>            | <p>Before-after non-randomised pilot study</p>                                                                                                                                                                                                                                                                                                                                                                                                                                                                                                                                                                                                                                                                                                                                                                                                                                                                                                                                                        |
| <p><b>Key inclusion criteria:</b></p>  | <p>Patients will be eligible for inclusion if they have/are: admitted to the acute or rehabilitation ward for a stroke, less than 21 days post stroke during baseline phase or post-implementation phase, the ability to provide informed consent as determined by the medical team, a Glasgow Coma Scale<sup>1</sup> score greater than 10 at the time of screening, an estimated length of hospital stay greater than 14 days, adequate English proficiency to participate in semi-structured interviews and are above 18 years of age. Patients with aphasia will also have an Aphasia Quotient below 93.7 on the Western Aphasia Battery-Revised.<sup>2</sup></p> <p>Staff participants: One representative from each acute and rehabilitation staff group including medical, nursing, volunteers, and allied health staff members (n=17), who are over 18 years old.</p>                                                                                                                         |
| <p><b>Key exclusion criteria:</b></p>  | <p>Patients will be excluded if they have/are: uncorrected hearing or vision, not medically stable, a documented diagnosis of dementia, traumatic brain injury or previous aphasia, a documented current untreated depression at the time of acute admission or are a participant in another research trial which may affect this study's outcome measures.</p>                                                                                                                                                                                                                                                                                                                                                                                                                                                                                                                                                                                                                                       |
| <p><b>Study Procedures:</b></p>        | <p><b>Baseline phase:</b> Eligible patients during the baseline phase will be observed and video recorded for 4 hours on 3 consecutive days (one weekend and two weekdays) and will complete a semi-structured interview to explore their experiences of communication, and their perceptions of barriers and facilitators to inpatient language activities during their inpatient admission.</p>                                                                                                                                                                                                                                                                                                                                                                                                                                                                                                                                                                                                     |

|                                      |                                                                                                                                                                                                                                                                                                                                                                                                                                                                                                                                                                                                                                                                                                                                                                                                                   |
|--------------------------------------|-------------------------------------------------------------------------------------------------------------------------------------------------------------------------------------------------------------------------------------------------------------------------------------------------------------------------------------------------------------------------------------------------------------------------------------------------------------------------------------------------------------------------------------------------------------------------------------------------------------------------------------------------------------------------------------------------------------------------------------------------------------------------------------------------------------------|
|                                      | <p>Staff will participate in a one-hour focus group to explore their perceptions of barriers and facilitators to inpatient language activities. A focus group interview schedule will be used across all focus groups.</p> <p><b>Implementation phase:</b> The CEE model will be implemented within the acute and rehabilitation wards.</p> <p><b>Post-implementation phase:</b> Intervention group patient observations and interviews, and staff focus groups will replicate baseline data collection.</p>                                                                                                                                                                                                                                                                                                      |
| <b>Safety parameters</b>             | <p>Patients and/or their significant others may experience increased levels of distress during recruitment and/or data collection. This may be the result of adjustment following stroke and/or diagnosis of aphasia and increased awareness of impairment. No other risks known regarding participation in this project. The baseline assessments and interview will be conducted by the Chief Investigator who has experience in supporting patients during this early stage of stroke recovery. If a patient or any significant others becomes upset or distressed, the assessment or interview will be paused with the option to discontinue and counselling strategies will be provided.</p>                                                                                                                 |
| <b>Statistical methods /analysis</b> | <p>Patient demographic and stroke characteristics will be presented using descriptive statistics. One-way ANOVA or the Kruskal-Wallis and chi-square tests will examine differences in characteristics between groups. Time spent observed in interactive and solitary language activities will be expressed as a percentage of total observations. A mixed design ANOVA will be used to calculate the within-subjects variable of presence of aphasia and the between-subjects variable of a CEE on language activity levels of patients by comparing baseline to intervention phase observations. A qualitative description research approach will be used for the qualitative component of this research. The mixed methods design will enable the triangulation of the qualitative and quantitative data.</p> |
| <b>Sample size determination:</b>    | <p>The patient sample size was selected for this pilot study to collect data across each observation period for each patient group in the baseline and intervention phases (see document: Observation_protocol_SD_version 3_23-02-16). The sample size for staff participants was selected to capture a sufficient breadth of professional perspectives.</p>                                                                                                                                                                                                                                                                                                                                                                                                                                                      |

### 3. Introduction

Aphasia is an acquired communication disorder that affects approximately 30% of first ever ischaemic stroke survivors<sup>3</sup> and persists in up to 61% of survivors one-year post stroke.<sup>4</sup> Aphasia impacts all communication modalities with significant negative consequences for social participation, interpersonal relationships, autonomy, capacity to work and quality of life.<sup>5</sup>

Patients following stroke with aphasia (PWA) have been observed to spend less than 28% of their day communicating and 44% of their day alone during their first weeks of inpatient rehabilitation.<sup>6</sup> Inadequate opportunities for communication places PWA at risk of developing maladaptive behaviours such as learned non-use of language.<sup>7</sup>

Environmental Enrichment (EE) refers to conditions which promote physical, cognitive and social activity and has been shown in animal models of stroke to enhance neuroplasticity<sup>8</sup>, promote better learning and memory and contribute to significant improvements in motor function.<sup>9</sup> The human equivalent model<sup>10</sup> in a rehabilitation unit results in patients spending more time engaged in activity and less time sleeping and alone.<sup>11</sup>

### 4. Objectives

Aphasia is a complex language impairment and PWA may need additional support within an Enriched Environment. This pilot study seeks to develop and test an adapted model of an Enriched Environment, a Communication Enhanced Environment (CEE), as a strategy to provide PWA and patients following stroke without aphasia (PWOA) more opportunities to engage in language activities during inpatient rehabilitation. Within this study language activities include both *solitary activities* that may promote aphasia recovery such as reading, writing, listening to the radio, and the use of iPad applications, and *interactive activities* which are based in communicative interactions that involve an exchange of information with a communication partner involving talking, gesture and/or facial expression, reading, writing or drawing to communicate.

#### 4.1 Hypotheses

A CEE will increase patient solitary and interactive language activities and improve staff and patient experiences of communication compared to a standard ward environment.

### 5. Study design

This mixed methods pilot study is a prospective before-after non-randomised controlled design in an acute and a rehabilitation ward of a metropolitan private hospital. The study involves three phases:

- i) *Baseline*: observe and quantify the current ward environment;
- ii) *Implementation* of the CEE model;
- iii) *Post-implementation*: assess the impact of the CEE model.

### 6. Study Population

- i) *Patients*: The baseline group (n=8, 4 PWA, 4 PWOA) recruited within the baseline phase, and the intervention group (n=8, 4 PWA, 4 PWOA) recruited during the post-implementation phase.

- 1 ii) *Staff participants*: One representative from each acute and rehabilitation staff group including medical,  
2 nursing, volunteers, and allied health staff members (n=17), who are over 18 years old.

### 3 **6.1 inclusion and exclusion criteria**

4 Patients will be eligible for inclusion if they have/are: admitted to the acute or rehabilitation ward for a  
5 stroke, less than 21 days post stroke during baseline phase or intervention phase, the ability to provide informed  
6 consent as determined by the medical team, a Glasgow Coma Scale<sup>1</sup> score greater than 10 at the time of screening,  
7 an estimated length of hospital stay greater than 14 days, adequate English proficiency to participate in semi-  
8 structured interviews and are above 18 years of age. Patients with aphasia will also have an Aphasia Quotient below  
9 93.7 on the Western Aphasia Battery-Revised.<sup>2</sup>

10 Patients will be excluded if they have/are: uncorrected hearing or vision, not medically stable, a documented  
11 diagnosis of dementia, traumatic brain injury or previous aphasia, a documented current untreated depression at  
12 the time of acute admission or are a participant in another research trial which may affect any of this study's  
13 outcome measures.

14 Staff and volunteers who are over 18 years old will be eligible to participate in this study.

## 15 **7. Study Assessments and Procedures**

### 16 **Baseline**

17 All recruited patients will complete the Montreal Cognitive Assessment,<sup>11</sup> and The NIH Stroke Scale.<sup>12</sup> PWA  
18 will also complete the Western Aphasia Battery-Revised.<sup>2</sup> Patients' behaviour will be observed and video recorded  
19 for four hours per day on a Sunday, Monday and Tuesday between 7am to 7pm. A behaviour mapping tool  
20 (Appendix A) developed for this study will record patient engagement in language activities in the first minute of  
21 each five-minute interval across each four-hour observation period. Semi-structured interviews will explore patients'  
22 perceptions of barriers and facilitators to inpatient language activities. An interview schedule will be used across all  
23 interviews (Appendix B.). Supportive communication strategies will be used to facilitate PWA participation in  
24 interviews with transcriptions annotated to capture any non-verbal responses.

25 Staff will participate in a one-hour focus group to explore their perceptions of barriers and facilitators to  
26 inpatient language activities. A focus group/interview schedule (Appendix C.) will be used across all focus groups.

### 27 **Implementation**

28 The CEE model will be implemented within the acute and rehabilitation wards.

### 29 **Post implementation**

30 Intervention group patient observations and interviews, and staff focus groups will replicate baseline data  
31 collection.

## 32 **8. Study Treatment**

33 The CEE model incorporates the following strategies to encourage engagement in language activities:

- 34 i) Staff training to facilitate patients' communication and provide opportunities to engage in language  
35 activities;
- 36 ii) Patient access to:



- a) Communication enhancement resources such as iPads and audiobooks;
- b) Communal areas to facilitate engagement amongst patients.

## 9. Participant Completion and Discontinuation

### 9.1 Participant Completion

Participants will have completed the study when they have completed the semi-structured interview.

### 9.2 Participant withdrawal

Participation in this study is voluntary. The participant can withdraw from taking part in the study at any time without giving a reason for withdrawing.

## 10. Data analysis

### 10.1 Primary Analysis

The proportion of observed episodes where PWA and PWOA are engaged in language activities at baseline and post implementation will be analysed using a mixed design ANOVA.

### 10.2 Secondary Analysis

The differences in staff and patient perceptions of the barriers and facilitators to inpatient language activities and communication post CEE implementation will be analysed through a qualitative description approach. Triangulation of the qualitative and quantitative data will be conducted.

## 11. Data management

The data collected will be confidential. No identifying information will be attached to the data and any information that may reveal participant's identity will be removed. The master list of participant names and codes will be kept in a locked filing cabinet at the hospital site which will only be accessible by the research team. All data will be accessed, used and stored in accordance with Commonwealth Privacy Laws. The de-identified data will be stored on a password-controlled computer and/or in a locked cabinet at Edith Cowan University. Electronic data will be backed up on a password controlled hard drive only accessible by the Chief Investigator.

The data collected from this study will have a significant contribution to the aphasia research area and therefore will be stored for 15 years following the completion of this study. Data may be accessed for future studies by the study investigators or higher degrees by research (HDR). In the case of HDR use of the data, the use of the data will be bound by a two-way confidentiality agreement. The data may be used for teaching purposes only with the additional written permission from participants. The data may be made accessible to consumer groups (for example the Australian Aphasia Association) and information may be made available through the National Stroke Foundation and scientific journals. Confidentiality will be maintained in all circumstances. Non-identifiable data will be accessible by researchers through data sharing archives. This data will be governed by an overarching body to ensure data are only used for approved purposes. Researchers who access this data from the data bank will not have access to the participant keys that attach participants to codes therefore data will only be re-identifiable by the Chief Investigator. Data will be deleted from electronic storage and hard copy data will be shredded by the chief



investigator after 15 years completion of the research study (with Ethics Committee approval, Ethics approval numbers: HPH431 and ECU HREC 12149). Non-identifiable data will be added to data archives for data sharing. Researchers who access data archives will not have access to information attaching participants to coded data.

## 12. Study Report

This study will be published in a PhD thesis as part of the Chief Investigator's Higher Research Degree. Outcomes from this study will be published in peer review journals and at conferences.

## 13. Administration Procedures

### 13.1 Ethical Considerations

This research is likely to have a significant impact on aphasia recovery following stroke and will form the basis for future study designs. This study will develop a teaching and learning package that can be used in the future to facilitate and promote increased levels of communication activity during early stroke recovery. The implementation of a CEE may address missed opportunities for language stimulation, harness increased levels of neuroplasticity and optimise aphasia language recovery after stroke. The benefit of a CEE may extend beyond patients with aphasia and may improve health care experience and communication access for all patients following stroke. Additionally, these benefits may extend beyond patients involved in the study as trained staff may use skills and knowledge obtained in the training program to enhance the communication environment of all patients they care for.

### 13.2 Ethical Review Committee

All processes and documentation used within this study will be reviewed and approved by the Edith Cowan University Research Ethics Committee and the site Ethics Committee. The Chief Investigator will complete the annual ethics reports and will be responsible for reporting any adverse events to the Ethics Committees.

### 13.3 Informed Consent

Participants will be excluded if they do not have adequate English proficiency to participate in semi-structured interviews and focus groups. Any participants that require an interpreter will be excluded from inclusion in this study as determined by the medical team.

Patients with aphasia will be provided with aphasia friendly information sheets and consent forms with simple language, bold key words and pictorial support. This will be read and explained by the researcher. Supported conversation strategies will be used to support and facilitate patients with aphasia's involvement and understanding of the research process, informed consent and their rights to withdraw at any time. This will be provided by the Chief Investigator who is a qualified speech pathologist with experience in communicating with patients with aphasia using supported conversation techniques to facilitate and support communication. A detailed information will also be provided to the 'person responsible' for all patients.

### 13.4 Protocol Amendments

All protocol amendments will be reviewed and accepted by the Edith Cowan University Research Ethics Committee and the site research Ethics Committee.

## 14. References

1. Teasdale G, Jennett B. Assessment of coma and impaired consciousness. A practical scale. *Lancet*. 1974;2(7872): 81–4.
2. Kertesz A. *Western Aphasia Battery- Revised*. San Antonio, TX, Harcourt Assessment; 2006.
3. Engelter AT, Gostynski M, Papa S, et al. Epidemiology of aphasia attributable to first ischemic stroke. *Stroke*. 2006 Mar 9;37: 1379-84.
4. Pederson PM, Jørgensen HS, Nakayama H, Raaschou HO, Olsen TS. Aphasia in acute stroke: Incidence, determinants, and recovery. *Annals of Neurology*. 1995 Oct;38(4): 659-66.
5. Kruithof WJ, van Mierlo ML, Visser-Meily JM, van Heugten CM, Post MW. Associations between social support and stroke survivors' health-related quality of life – a systematic review. *Patient Educ Couns*. 2013;93(2): 169–76.
6. Godecke E, Armstrong E, Hersh D, Bernhardt J. Missed Opportunities: Communicative interactions in early stroke recovery. *Stroke Society of Australasia Annual Scientific Meeting*. Hamilton Island, Queensland. 2014.
7. Nithianantharajah J, Hannan AJ. Enriched environments, experience dependent plasticity and disorders of the nervous system. *Nat Rev Neuroscience*. 2006;7(9): 697-709.
8. Janssen H, Bernhardt J, Collier JM, et al. An enriched environment improves sensorimotor function post-ischemic stroke. *Neurorehab Neural Re*, 2010;24(9), 802–813.
9. Janssen H, Ada L, Karayanidis F, et al. Translating the use of an enriched environment poststroke from bench to bedside: study design and protocol used to test the feasibility of environmental enrichment on stroke patients in rehabilitation. *Int J Stroke*. 2012;7: 521–526.
10. Janssen H, Ada L, Bernhardt J, et al. An enriched environment increases activity in stroke patients undergoing rehabilitation in a mixed rehabilitation unit: A pilot non-randomized controlled trial. *Disabil Rehabil*. 2014;36(3), 255–262.
11. Nasreddine ZS, Phillips NA, Bédirian, V, et al. The Montreal Cognitive Assessment, MoCA: A brief screening tool for mild cognitive impairment. *J Am Geriatr Soc*. 2005;53(4): 695-9.
12. NIH stroke scale [Internet]. Bethesda, Md, National Institute of Neurological Disorders and Stroke (U.S.). 2011 [cited 2016 Feb 10]. Available from [https://www.ninds.nih.gov/sites/default/files/NIH\\_Stroke\\_Scale.pdf](https://www.ninds.nih.gov/sites/default/files/NIH_Stroke_Scale.pdf)

## Appendix A. Behavioural mapping tool

| Time (5 min): _____                                                                         | NO LANGUAGE ACTIVITIES OBSERVED ( <i>describe</i> )                                                                                                             |                                                                                                                                                                                                                                                                                                                                             |                                                                                                                                                                                                                          | COMMENTS |
|---------------------------------------------------------------------------------------------|-----------------------------------------------------------------------------------------------------------------------------------------------------------------|---------------------------------------------------------------------------------------------------------------------------------------------------------------------------------------------------------------------------------------------------------------------------------------------------------------------------------------------|--------------------------------------------------------------------------------------------------------------------------------------------------------------------------------------------------------------------------|----------|
| Location (select one)                                                                       | People present                                                                                                                                                  | INTERACTIVE LANGUAGE ACTIVITIES                                                                                                                                                                                                                                                                                                             | 'OTHER' FUNCTIONAL LANGUAGE ACTIVITIES                                                                                                                                                                                   |          |
| Amenities<br>Bedroom<br>Hall<br>Therapy area<br>Family Mtg Room<br>Activity room            | Nurse<br>Personal care assistant<br>Doctor<br>Physio<br>OT<br>SP<br>DT<br>Social worker<br>Family/Friend<br>Other patient<br>Alone<br>Other ( <i>describe</i> ) | In person<br>Telephone<br>Therapy session/ward round<br>Other ( <i>describe</i> )<br><br><b>Patient</b><br>Verbal communication<br>Non-verbal gesture/facial expression ( <i>describe</i> )<br><br>Written aids ( <i>writing or reading (circle)</i> )<br>Pictorial aids ( <i>describe</i> )<br>Other communication aid ( <i>describe</i> ) | Typing/writing<br>Reading ( <i>describe</i> )<br><br>Texting (mobile phone)<br>Listening to radio/music<br>Watching TV<br>Internet use ( <i>describe</i> )<br><br>Word games with a partner<br>Other ( <i>describe</i> ) |          |
| <b>ON WARD</b><br>Doctor's room<br>Dining room<br>Communal area ( <i>describe</i> )         |                                                                                                                                                                 |                                                                                                                                                                                                                                                                                                                                             | <b>NON-FUNCTIONAL/ NON-PROPOSITIONAL LANGUAGE ACTIVITIES</b>                                                                                                                                                             |          |
| <b>OFF WARD</b><br>Outside<br>Off-unit ( <i>describe</i> )<br><br>Other ( <i>describe</i> ) |                                                                                                                                                                 | <b>Communication partner/s</b><br>Verbal communication<br>Non-verbal gesture/facial expression ( <i>describe</i> )<br><br>Written aids<br>Pictorial aids<br>Other communication aid ( <i>describe</i> )                                                                                                                                     | Singing<br>Word games (alone)<br>Language apps (alone)<br>Copying written letters, words, sentences (alone).                                                                                                             |          |
|                                                                                             |                                                                                                                                                                 |                                                                                                                                                                                                                                                                                                                                             | <b>OTHER</b>                                                                                                                                                                                                             |          |
|                                                                                             |                                                                                                                                                                 |                                                                                                                                                                                                                                                                                                                                             | Talking to observer<br>Talking to self: appropriate/inappropriate ( <i>describe</i> )                                                                                                                                    |          |
| Time (5 min): _____                                                                         | NO LANGUAGE ACTIVITIES OBSERVED ( <i>describe</i> )                                                                                                             |                                                                                                                                                                                                                                                                                                                                             |                                                                                                                                                                                                                          | COMMENTS |
| Location (select one)                                                                       | People present                                                                                                                                                  | INTERACTIVE LANGUAGE ACTIVITIES                                                                                                                                                                                                                                                                                                             | 'OTHER' FUNCTIONAL LANGUAGE ACTIVITIES                                                                                                                                                                                   |          |
| Amenities<br>Bedroom<br>Hall<br>Therapy area<br>Family Mtg Room<br>Activity room            | Nurse<br>Personal care assistant<br>Doctor<br>Physio<br>OT<br>SP<br>DT<br>Social worker<br>Family/Friend<br>Other patient<br>Alone<br>Other ( <i>describe</i> ) | In person<br>Telephone<br>Therapy session/ward round<br>Other ( <i>describe</i> )<br><br><b>Patient</b><br>Verbal communication<br>Non-verbal gesture/facial expression ( <i>describe</i> )<br><br>Written aids ( <i>writing or reading (circle)</i> )<br>Pictorial aids ( <i>describe</i> )<br>Other communication aid ( <i>describe</i> ) | Typing/writing<br>Reading ( <i>describe</i> )<br><br>Texting (mobile phone)<br>Listening to radio/music<br>Watching TV<br>Internet use ( <i>describe</i> )<br><br>Word games with a partner<br>Other ( <i>describe</i> ) |          |
| <b>ON WARD</b><br>Doctor's room<br>Dining room<br>Communal area ( <i>describe</i> )         |                                                                                                                                                                 |                                                                                                                                                                                                                                                                                                                                             | <b>NON-FUNCTIONAL/ NON-PROPOSITIONAL LANGUAGE ACTIVITIES</b>                                                                                                                                                             |          |
| <b>OFF WARD</b><br>Outside<br>Off-unit ( <i>describe</i> )<br><br>Other ( <i>describe</i> ) |                                                                                                                                                                 | <b>Communication partner/s</b><br>Verbal communication<br>Non-verbal gesture/facial expression ( <i>describe</i> )<br><br>Written aids<br>Pictorial aids<br>Other communication aid ( <i>describe</i> )                                                                                                                                     | Singing<br>Word games (alone)<br>Language apps (alone)<br>Copying written letters, words, sentences (alone).                                                                                                             |          |
|                                                                                             |                                                                                                                                                                 |                                                                                                                                                                                                                                                                                                                                             | <b>OTHER</b>                                                                                                                                                                                                             |          |
|                                                                                             |                                                                                                                                                                 |                                                                                                                                                                                                                                                                                                                                             | Talking to observer<br>Talking to self: appropriate/inappropriate ( <i>describe</i> )                                                                                                                                    |          |

## Appendix B. Patient interview guide

**Investigating Communication Enhanced Environments after stroke****Patient Interview guide, version 1\_11-8-15**

Tell me about what kind of activities you do while you are here (in hospital).

Describe your experience of communicating with people on the ward.

What makes it easier to communicate with people on the ward?

What makes it hard to communicate with people on the ward?

What can we do to make communicating with people easier?

For peer review only

Appendix C. Staff focus group guide.

**Investigating Communication Enhanced Environments after stroke**  
**Staff focus group guide, version 1\_27-7-15**

STAFF FOCUS GROUP GUIDE BASELINE PHASE

What kind of language activities or language tasks do patients following stroke currently participate in on the ward?

What kind of language activities or language tasks would you like see patients following stroke have access to on the wards?

Describe your experience of communicating with patients following stroke at the moment.

Can you tell me about anything that facilitates your ability to communicate with patients following stroke on the ward?

Can you tell me about any barriers you experience that impact your ability to communicate with patients following stroke on the ward?

What changes would you like to see to enhance communication between staff and patients following stroke on the ward?

What changes would you like to see to enhance communication between visitors and patients following stroke on the ward?

How could we enhance or optimise communication and language tasks and activities for patients following stroke on the ward?

What do you think a communication and language enhanced stroke ward environment might look like?

STAFF FOCUS GROUP GUIDE POST-IMPLEMENTATION PHASE

Describe your experience of communicating with patients following stroke at the moment.

Can you tell me about any barriers you experience that impact your ability to communicate with patients following stroke on the ward?

Describe the differences in the communication environment since implementing the model.

What changes did you see to enhance communication between staff and patients following stroke on the ward?

What changes did you see to enhance communication between visitors and patients following stroke on the ward?

What was it like to use the model?

How do you feel about the model?

Can you tell me about anything that helped you use the model with patients following stroke on the ward?

Can you tell me about any barriers you experienced while implementing the model?

How can we improve the model?

## Communication Enhanced Environments after Stroke

### Study procedure version 2\_23-02-16

#### BASELINE:

*Staff recruitment:* The Chief Investigator will recruit staff participants through a verbal explanation of the study and the provision of the information sheets and written consent forms. Staff will be provided 48 hours to discuss the study and ask questions before consenting to participate. Staff interviews and focus groups will commence as staff participants are recruited. Staff will participate in a one-hour focus group or a one-hour semi-structured interview (in person or via telephone) to explore staff perceptions of environmental barriers and facilitators to language activity and communication on in-patient acute and rehabilitation wards.

*Patient recruitment:* All consecutively admitted patients following stroke during the baseline period will be screened for eligibility to participate in the study. The hospital site investigators will identify potential patient participants that meet the inclusion and exclusion criteria. Patients following stroke with aphasia will be identified by the hospital speech pathology or medical team as having a diagnosis of aphasia (aphasia diagnosis will be confirmed via Western Aphasia Battery-Revised (WAB-R)<sup>1</sup> Aphasia Quotient score <93.7 during data collection). The site investigators will approach potential participants and gain verbal consent from the patient to be approached by a member of the research team and have their 3-point identification released to the research team. This will be documented in the patient's integrated medical progress notes. Once verbal consent has been gained and documented, the site investigators will email the Chief Investigator the patient alert proforma identifying the patient as meeting the inclusion/exclusion criteria. The research team will liaise with the medical team to confirm the potential participant meets the inclusion criteria: (i) admitted to the in-patient unit for recent stroke, (ii) are less than 21 days post stroke and during baseline phase or intervention phase, (iii) have the ability to provide informed consent as determined by the medical team iv) Glasgow Coma Scale<sup>2</sup> greater than 10 at the time of screening, (v) have an estimated length of stay greater than 14 days and (vi) have adequate English proficiency to participate in semi-structured interviews. Patients will be excluded if they (i) have uncorrected hearing or vision (for example hearing impairment without hearing aids, vision impairment without glasses), (ii) are not medically stable, (iii) have a documented diagnosis of major depression or (iv) have a documented history of dementia or significant cognitive decline, traumatic brain injury or previous aphasia at the time of admission for the acute event, (v) or are a participant in a research study that will influence this study's outcomes. Patient participant recruitment will follow the patient participant consent procedure (see document: SD\_Communication Enhanced Environments after Stroke consent procedure version 1\_3-2-15). A record of identifying participant details attached to patient codes will be kept at the hospital site in a locked filing cabinet. An email summary of the baseline assessment results will be sent to the hospital speech pathology generic email address. The patient will be identified by patient code and ward/room number. The hospital speech pathology team will write a summary of the assessment results in the patient's integrated medical progress notes.

**Patient data collection:** All recruited patient participants will complete the NIH Stroke Scale<sup>3</sup> (by someone trained in using this tool) and the Montreal Cognitive Assessment (MoCA).<sup>4</sup> Participants with aphasia will also complete an

1 assessment of aphasia, the WAB-R<sup>1</sup> and provide a personal narrative language sample on their reason for admission  
2 to confirm a diagnosis of aphasia. After patient recruitment has been completed, the Chief Investigator and/or  
3 trained medical team members will recruit the patient's family, friends and significant others to consent to video  
4 recording and observations of their interactions with patient participants.  
5  
6  
7

8 Observations of patient participants will commence 1-3 days after obtaining written consent. Patients' behaviour will  
9 be observed by the Chief Investigator or a Research Assistant, and video recorded for a total of 12 hours to enable  
10 behaviour mapping of video data (see document: Observation\_protocol\_SD\_version 3\_23-02-16). Patients will be  
11 observed and video recorded for 4 hours per day on weekend day and two consecutive weekdays between 7am to  
12 7pm. The observation periods will be grouped into 4-hour observation intervals (e.g. 7am-11am, 11am-3pm and  
13 3pm-7pm). Each day the patient will be observed and video recorded for one observation interval. The participant  
14 will be observed and video recorded during a different observation interval each day to gain a general insight into  
15 the patients' activities (see Figure 1. below). Patients who do not consent to video recording will be provided with  
16 the option of audio recording and manual observation conducted by the researcher to enable the collection of case  
17 notes regarding patient behaviour. An observational protocol developed for this study will be used to measure the  
18 frequency patient participants engage in language activities. These will be categorised into *solitary language*  
19 *activities* for example reading, writing, listening to the radio, use of iPad applications, and *interactive language*  
20 *activities* defined as i) an interaction involving an exchange of information, ii) with a communication partner  
21 including gesture and/or facial expression, reading, writing or drawing for the purpose of communication and use of  
22 technology including talking on the telephone. The observational protocol will be based on the behavioural mapping  
23 techniques of Janssen et al.<sup>5</sup> Patients' solitary and interactive language activities will be recorded in 5-minute  
24 intervals and activity observed within the first minute of the observation interval will be recorded on a checklist of  
25 the predetermined behaviours. Semi-structured supported conversation interviews for patient participants will be  
26 conducted within 5 days of the last observation. The interviews will explore patients' perceptions of environmental  
27 barriers and facilitators to language activities and communication and their experience of communication on the  
28 acute and rehabilitation wards.  
29  
30  
31  
32  
33  
34  
35  
36  
37  
38  
39  
40  
41  
42  
43  
44

#### 45 IMPLEMENTATION:

46 A model of a CEE will be implemented within the acute and rehabilitation wards. The model will be developed as  
47 part of the research project. We hypothesise that our model of CEE will include the provision of:  
48

- 49 i) CEE equipment, for example reading materials such as books and magazines, access to a computer with internet  
50 and access to a communal dining area,  
51
- 52 ii) CEE education, support and training for staff, patients and their family, friends and significant others with the aim  
53 to develop the ability to support and facilitate 'language activity' and 'communication activity' for patients after  
54 stroke. This will be accessible via multiple modalities including one-on-one training and group training sessions, as  
55 well as through the provision of video and written resources. A questionnaire will be administered pre and post  
56 training in order to determine staffs' perceptions of changes in their knowledge, skills and attitude towards  
57  
58  
59  
60

communication and aphasia. Additionally, feedback regarding the content and format of the training program will be obtained through questionnaires administered after the completion of the training program. Training and support provided in the implementation phase will be continued until the end of the intervention phase.

#### POST-IMPLEMENTATION:

Staff participant semi-structured interviews and focus groups will be conducted. Staff will participate in a one-hour semi-structured interview or a one-hour focus group to explore staff perceptions of environmental barriers and facilitators to language activities and communication.

The procedures for participant recruitment and data collection during the post-implementation phase will replicate those used in the baseline phase.

There is no travel commitment for all participants as all data collection and training will be conducted at the hospital.

| Observation interval | Observation time | Day 1: Sunday | Day 2: Monday | Day 3: Tuesday |
|----------------------|------------------|---------------|---------------|----------------|
| 1                    | 7am-8am          | PWA1          | PWA3          | PWA2           |
|                      | 8am-9am          | PWOA1         | PWOA3         | PWOA2          |
|                      | 9am-10am         |               |               |                |
|                      | 10am-11am        |               |               |                |
| 2                    | 11am-12pm        | PWA2          | PWA1          | PWOA           |
|                      | 12pm-1pm         | PWOA2         | PWOA1         | PWOA3          |
|                      | 1pm-2pm          |               |               |                |
|                      | 2pm-3pm          |               |               |                |
| 3                    | 3pm-4pm          | PWA3          | PWA2          | PWA1           |
|                      | 4pm-5pm          | PWOA3         | PWOA2         | PWOA1          |
|                      | 5pm-6pm          |               |               |                |
|                      | 6pm-7pm          |               |               |                |

Figure 1. CEE Observation schedule



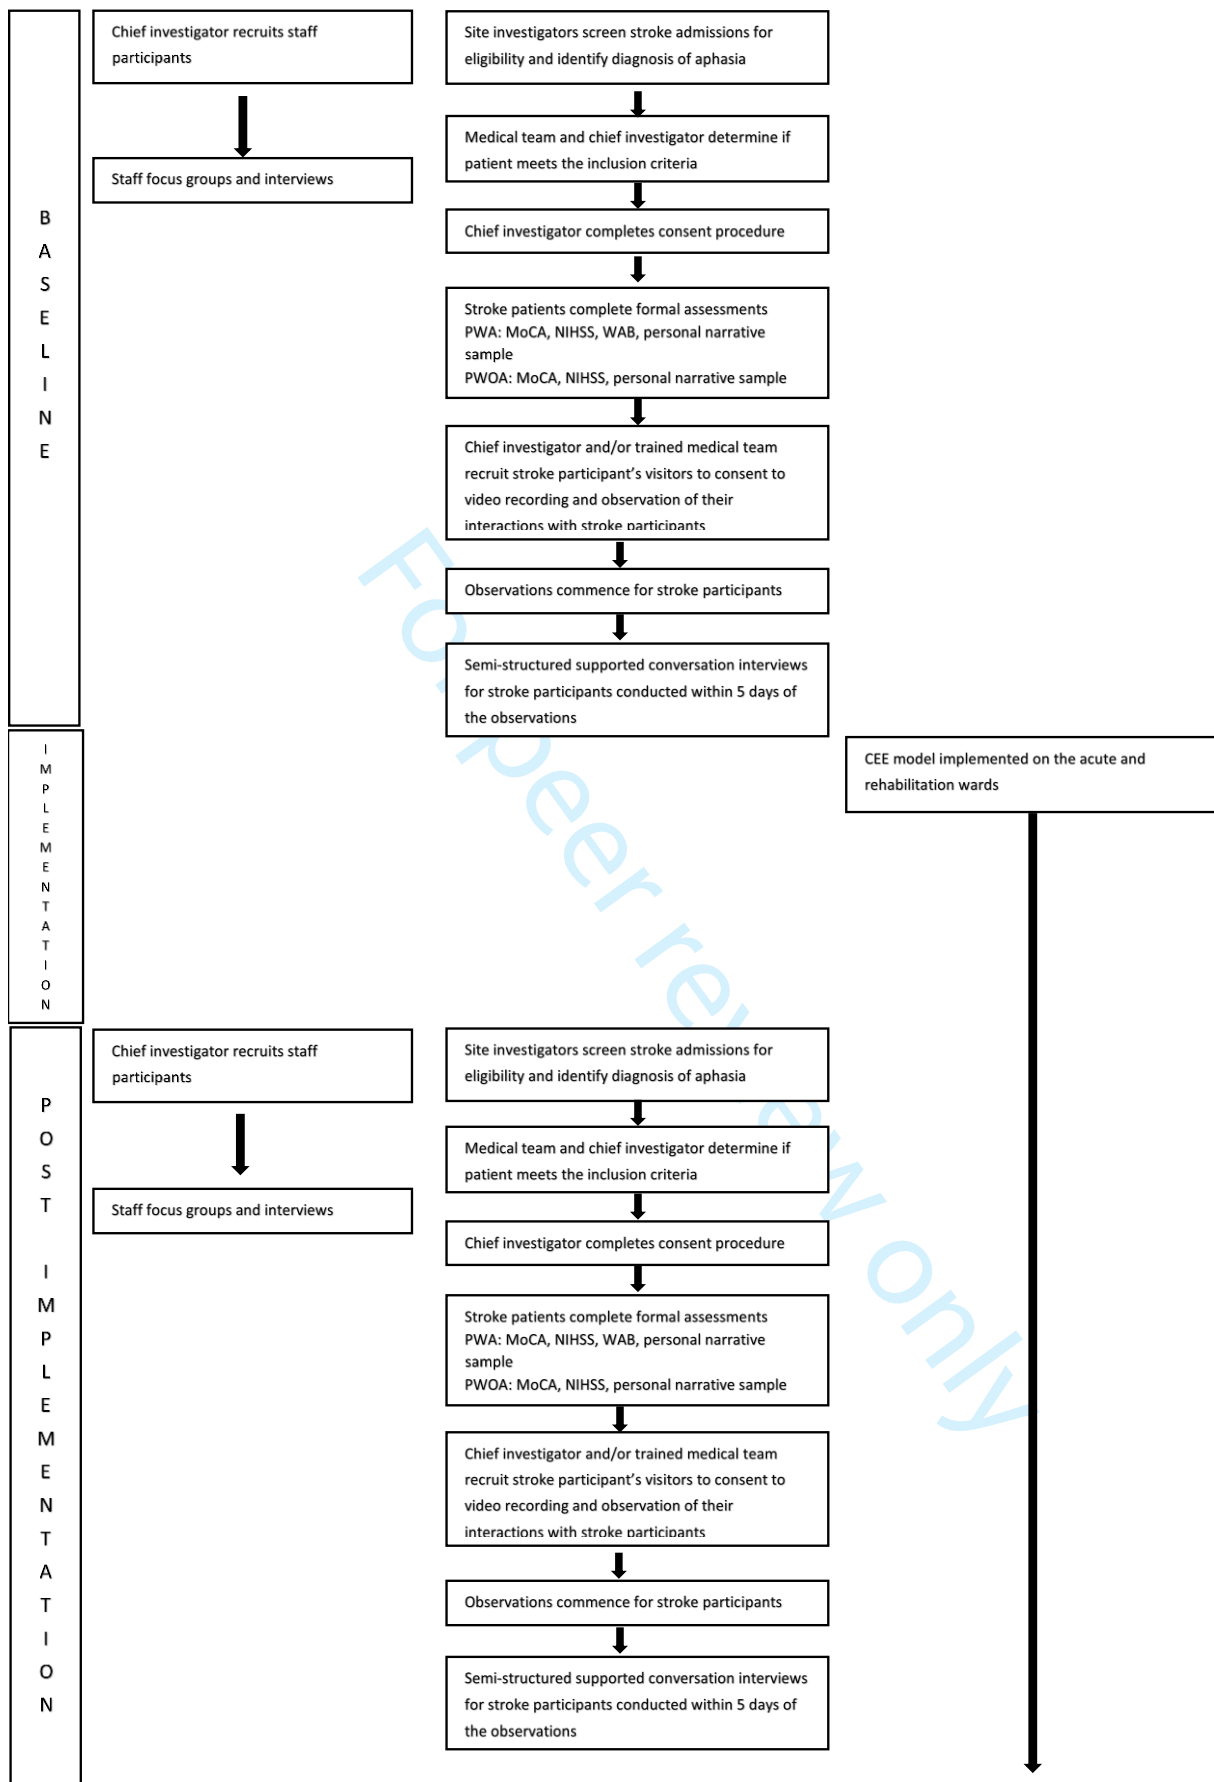

Figure 2. Study flow diagram

**References**

1. Kertesz A. Western Aphasia Battery- Revised. San Antonio, TX, Harcourt Assessment; 2006.
2. Teasdale G, Jennett B. Assessment of coma and impaired consciousness. A practical scale. *Lancet*. 1974;2(7872): 81–4.
3. NIH stroke scale [Internet]. Bethesda, Md, National Institute of Neurological Disorders and Stroke (U.S.). 2011 [cited 2016 Feb 10]. Available from [https://www.ninds.nih.gov/sites/default/files/NIH\\_Stroke\\_Scale.pdf](https://www.ninds.nih.gov/sites/default/files/NIH_Stroke_Scale.pdf)
4. Nasreddine ZS, Phillips NA, Bédirian, V, et al. The Montreal Cognitive Assessment, MoCA: A brief screening tool for mild cognitive impairment. *J Am Geriatr Soc*. 2005;53(4); 695-9.
5. Janssen H, Ada L, Bernhardt J, et al. An enriched environment increases activity in stroke patients undergoing rehabilitation in a mixed rehabilitation unit: A pilot non-randomized controlled trial. *Disabil Rehab*, 2014; 36(3), 255–262. doi: 10.3109/09638288.2013.788218

**Communication Enhanced Environments after Stroke consent procedure****Version 1\_3-2-15****Patient participants**

The following consenting procedure will be used for all participants who are identified as potential research participants. Recruitment will only be completed by the Chief Investigator.

1. Check the patient meets the inclusion criteria and exclusion criteria.
2. Read the participant information sheet to the patient. Use the pictures on the participant consent form to support their comprehension of verbal information. Use gesture, written and pictorial support to facilitate verbal communication as required.
3. Provide the person responsible with the person responsible information sheet and consent form.
4. Provide time for the patient and the person responsible to discuss the study and ask questions to their satisfaction.
5. Ask the patient if they consent to the study using simple closed questions (e.g. "Do you understand what the study is about?", "Do you have any questions about the study?", "Do you want to be in the study?", "Will you sign the form?"). Use multi-modal communication strategies and repeat information/questions as required. Use the pictures on the participant consent form to support patient comprehension of verbal information.
6. If the patient agrees to participate in the study, ensure they sign the consent form witnessed by someone independent of the study.
7. Provide the patient with a copy of the information sheet and consent form for their own records.
8. Add the participant study number to the consent form
9. Store the signed consent forms in a locked cabinet at the hospital site. This cabinet will only be accessible by the research investigators.

**Investigating Communication Enhanced Environments after stroke**

**Observation Protocol version 3\_ 23-2-16**

During the baseline and intervention period, patients’ behaviour will be observed and video recorded for a total of 12 hours. Patients who do not consent to video recording will be provided with the option of audio recording and manual observation. This will enable the collection of relevant notes about factors that might influence the interactions that may not be captured in the video or behavioural mapping, for example the context of the interactions or details about the environment.

Patients will be manually observed and video recorded for four hours per day on two weekdays and one weekend day between 7am to 7pm. The observations will be grouped into three x 4-hour observation intervals (e.g. 7am-11am, 11am-3pm, 3pm-7pm). Each day the patient will be observed and video recorded for one of the 4-hour observation intervals. The 4- hour observation period will be split into 5-minute intervals. All language and communication activity observed within the first minute of the 5-minute interval will be recorded on the behavioural mapping sheet with predetermined behaviours (Appendix 1). The free smart phone app ‘Impetus’ can be used to time 1-minute observations. You can set the timer to vibrate briefly when the 1-minute observation interval begins and ends.

Observation times (see Figure 1.) will be randomly selected by drawing out of an envelope. This will be conducted by the primary investigator prior to commencing patient observations. It may not be possible to observe the patient during the planned observation time, for example as a result of scheduled testing or home visits. If this occurs, patients can be observed during the next available observation interval. Changing or modifying the observation schedule should be avoided where possible.

| Observation interval | Observation time | Day 1: Sunday | Day 2: Monday | Day 3: Tuesday |
|----------------------|------------------|---------------|---------------|----------------|
| 1                    | 7am-8am          | *PWA1         | PWA3          | PWA2           |
|                      | 8am-9am          | **PWOA1       | PWOA3         | PWOA2          |
|                      | 9am-10am         |               |               |                |
|                      | 10am-11am        |               |               |                |
| 2                    | 11am-12pm        | PWA2          | PWA1          | PWA3           |
|                      | 12pm-1pm         | PWOA2         | PWOA1         | PWOA3          |
|                      | 1pm-2pm          |               |               |                |
|                      | 2pm-3pm          |               |               |                |
| 3                    | 3pm-4pm          | PWA3          | PWA2          | PWA1           |
|                      | 4pm-5pm          | PWOA3         | PWOA2         | PWOA1          |
|                      | 5pm-6pm          |               |               |                |
|                      | 6pm-7pm          |               |               |                |

Figure 1. Observation schedule

\*PWA: patient with aphasia

\*\*PWOA: patient without aphasia

## DISCOURSE SAMPLE

1  
2 You must collect a personal narrative discourse sample for each participant at the beginning of the first observation.  
3  
4 Once you have set up the video camera and have started recording, ask the patient “what has brought you into  
5 hospital?”. Once the patient has finished telling you their personal narrative, tell the patient you will now start the  
6 observations.  
7  
8  
9

## VIDEO RECORDING SET-UP

10  
11  
12  
13  
14 Place the video camera facing the patient approximately 1-2 metres away from them. Ensure the camera is placed in  
15 an area where it is unlikely to be moved for the duration of the observation time (for example at the end of the  
16 patient’s bed). Ensure the camera frame is capturing the patient as well as their surroundings (e.g. potential  
17 communication partners, visitors, etc). If the patient relocates, reposition the camera to ensure the patient and their  
18 surroundings remain in frame. Observe and manually record the patient’s behaviour and their environment  
19 according to the procedure for behavioural mapping.  
20  
21  
22

23  
24 Do not record the patient in the bathroom or shower or during any other inappropriate circumstances (this may  
25 include sensitive conversations, culturally sensitive situations or if the patient requests). If the patient indicates that  
26 they don’t want to be recorded or becomes agitated, upset or distressed, use the ‘withdrawal from observations  
27 visual resource’ (if appropriate) and ask the patient:  
28  
29  
30

- 31 1. Do they want you to stop video recording?
- 32  
33 2. Do they want to be manually observed and audio recorded instead?
- 34  
35 If the patient responds ‘no’, ask the patient-
- 36  
37 3. Can you come back another time to observe them?
- 38  
39  
40  
41  
42  
43  
44

45 If the patient asks you to stop recording you must cease recording immediately. The patient may allow you to  
46 continue with manual observations or come back another time to complete the observations. If the patient allows  
47 you to complete manual observations and audio recording, follow the audio-recording set-up and protocol below.  
48  
49  
50  
51

## AUDIO RECORDING SET-UP AND PROTOCOL

52  
53  
54 This protocol is to be followed if the patient or their family indicate they do not want to be video recorded however  
55 agree to audio recording and manual observations. Place the cap on the video camera and continue recording in  
56 order to capture audio. If using a battery-operated audio recorder, place it on a table close to the patient (within 1  
57 metre). Ensure the audio recorder is placed in a location where it will not be touched or moved throughout the  
58  
59  
60

1 observation time. Observe and manually record the patient's behaviour and their environment according to the  
2 procedure for behavioural mapping. Ensure spare batteries for the audio recorder are available if required.  
3  
4  
5

## 6 **COMMUNICATION PARTNERS AND VISITORS**

7  
8 Take note of all communication partners and visitors who have provided consent to video recording and/or  
9 observations of their patient interactions. If someone enters the room during recording politely interrupt the  
10 interaction, introduce yourself and inform the person that the patient is being video recorder recorded as a part of  
11 the study the patient has agreed to participate in. Ask the visitor if they would like to go out of the room with the  
12 researcher to find out about the study and the video recording. Provide a verbal explanation of the study and  
13 provide the 'Visitors/communication partners' information and consent form'. Offer the visitor the option of no  
14 video or manual recoding during their interaction with the patient. If the person chooses not to participate in  
15 manual or video observations inform the person that any incidental recordings of them will be deleted and will not  
16 be included in the study. The researcher will step out of the room for the duration of their visit.  
17  
18  
19  
20  
21  
22  
23  
24  
25

## 26 **PROCEDURE FOR BEHAVIOURAL MAPPING**

- 27 • Position self where the patient can be clearly observed
- 28 • Remain inconspicuous as possible
- 29 • Circle ALL appropriate components on the observation schedule in regards to location, activity, people  
30 present and details of language and communication observed within the first minute of each five-minute  
31 interval.
- 32 • You can circle more than one key per section if required (except for location).
- 33 • If you require a toilet break, leave the camera recording while you take a break. If you miss a 1-minute  
34 observation, place a line through the observation interval on the behavioural mapping sheet and write  
35 'unobserved-toilet break'.  
36  
37  
38  
39  
40  
41  
42  
43  
44  
45

## 46 **TIME**

- 47 • Write the time at the beginning of the 1-minute observation interval

## 48 **LOCATION**

- 49 • Circle only one location
- 50 • If the patient is moving between two locations, circle the location the patient is moving towards

51 AMENITIES: Toilet, shower.

52  
53  
54  
55  
56  
57  
58  
59 BEDROOM: Around the patient's room or bed. If the patient is outside of their doorway this is considered 'hall'.  
60

1 HALL: Any hallway within the hospital ward.

2 THERAPY AREA: In an allied health therapy session, including occupational therapy, physiotherapy, speech  
3 pathology, nursing.

4 FAMILY MEETING ROOM: Family meeting room.

5 DOCTOR'S ROOM: Doctor's office.

6 DINING ROOM: Dining room during meal times or any other time.

7 COMMUNAL AREA: Communal dining area.

8 OUTSIDE: Outside areas including the garden, car park.

9 OFF UNIT: Off-site locations, home visits, testing off site.

10 OTHER: Anything that doesn't fit into the above categories-provide description of location.

## 11 PEOPLE PRESENT

12 People present include any person that is near the patient and is able to have an interaction with the patient. If you  
13 do not know how to classify the person make a note to check with staff at a later time and complete the observation  
14 schedule.

15 **Exceptions:** People who are near the patient but are unable to interact with the patient, e.g. cognitive or behavioural  
16 issues, barriers between person and the patient preventing them from interacting- e.g. curtain drawn, people in the  
17 way. If an interaction is occurring despite objects in the way, the communication partner is considered as a 'person  
18 present'.

19 PEOPLE PRESENT: Nurse, nurse assistant, doctor, physio (physiotherapist), OT (occupational therapist), SP (speech  
20 pathologist), DT (dietician), SW (social worker), family/friend, other patient, alone (no-one present that is conducive  
21 to interactions), other (describe).

## 22 ACTIVITIES

23 UNOBSERVED: If you are unable to observe the patient. Place a line through the observation  
24 interval and write unobserved.

25 NO LANGUAGE ACTIVITY: If the patient is observed not engaged in any communication activity.

- 26 • Circle 'no activity' on the checklist
- 27 • Write what the patient is doing, e.g. 'sleeping'

28 INTERACTIVE LANGUAGE ACTIVITIES: Defined as an interaction involving an immediate communicative exchange  
29 with a communication partner. Interactive language activities may include talking, gesture and/or facial expression,  
30 reading, writing or drawing for the purpose of communication, use of communication aids or AAC devices and use of  
31 technology including talking on the telephone. Non-verbal gesture or facial expression includes eye contact to

1 initiate interactions, hand gestures (e.g. waving, thumbs up), body movements for the purpose of conveying a  
2 communicative message (e.g. shrugging) and/or facial expressions for the purpose of communication.

3 Communication aids or AAC devices includes any use of alternative and augmentative devices for the purpose of  
4 communication, e.g. high-tech or low-tech AAC devices such as letter boards, pictures/photos, whiteboard, writing  
5 or drawing, smart phones, iPad. Please describe communication aids observed.  
6  
7

8  
9 OTHER FUNCTIONAL COMMUNICATION ACTIVITIES: All other communication activities that do not involve a direct  
10 immediate communicative exchange with a communication partner. Functional communication activity may include  
11 reading, typing/writing, emailing, internet use, watching TV, listening to talking on the radio. Note the patient must  
12 be looking directly at the TV to be considered 'watching TV'. If the TV is on in the background, do not include this as  
13 'watching TV'.  
14  
15

16  
17 NON-FUNCTIONAL/NON-PROPOSITIONAL LANGUAGE ACTIVITIES: Singing, word games (carried out alone), language  
18 apps (used alone), copying written letters, words or sentences (carried out alone).  
19  
20

21  
22 OTHER: Communication or language activities that do not fit the criteria of interactive language activity, 'other'  
23 functional communication activities, non-functional/non-propositional language activities or may be a confounding  
24 variable (for example, talking to self and talking to the observer). If a patient is talking to themselves, note if this is  
25 appropriate (for example, saying 'excuse me' after burping) or inappropriate (for example, an extensive monologue)  
26 and describe the context. If the patient's verbal output is inaudible, write this in the space underneath 'talking to  
27 self'.  
28  
29  
30  
31

32  
33 **Note:** If the patient is using a computer, phone, smart device, or iPad where the activity they are engaged in (e.g.  
34 texting, emailing, playing a game, etc) cannot be accurately determined, note this in the comments section. After the  
35 1-minute observation interval has been completed ask the patient if they mind sharing if what activity they were  
36 completing on their device and record this in the relevant section. If the patient does not wish to share this  
37 information with you, record this in the 'other' section.  
38  
39  
40

#### 41 **COMMENTS**

42  
43 Describe the context of the interactions or details about the environment in the comments section. This will provide  
44 information regarding factors that may influence the interactions, for example 'background noise'. Additionally,  
45 write down any information that may be missed in the video data, for example, people out of the camera frame,  
46 interactions that may be overheard in the room that might impact on the current interactions.  
47  
48  
49

50  
51 Draw a line under the final comment after the one-minute observation had been completed. Write any additional  
52 observations within the final 4 minutes below this line (see example).  
53  
54  
55

56  
57 If you have any queries or questions regarding this observation protocol or the observation protocol please contact  
58 chief investigator Sarah D'Souza.  
59  
60



# Patient participant information and consent form

## Communication activity in hospital

This research project is being undertaken as **part of the requirements** of a **PhD at Edith Cowan University**.

### Researchers' contact details

| <b>Edith Cowan University</b>                                                                   |                                        |                  |
|-------------------------------------------------------------------------------------------------|----------------------------------------|------------------|
| <b>Chief Investigator/</b><br>PhD student                                                       | <b>Sarah D'Souza</b>                   | Ph: 0439 982 451 |
| Principal Supervisor                                                                            | Professor Beth<br>Armstrong            | Ph: 08 6304 2769 |
| Co-Supervisor                                                                                   | Associate Professor<br>Natalie Ciccone | Ph: 08 6304 2047 |
| Co-Supervisor                                                                                   | Associate Professor<br>Erin Godecke    | Ph: 08 6304 5901 |
| Co-Supervisor                                                                                   | Associate Professor<br>Deborah Hersh   | Ph: 08 6304 2563 |
| <b>Hunter Stroke Service, University of Newcastle and Hunter<br/>Medical Research Institute</b> |                                        |                  |
| Adjunct Supervisor                                                                              | Dr Heidi Janssen                       | Ph: 02 40420417  |

1 You are **invited** to participate in a research project. Sarah D'Souza, a  
2 speech pathologist and PhD student is leading the study as Chief  
3 Investigator. This study has received ethical **approval** from **ECU** Human  
4 Research **Ethics Committee** and the Hollywood Private Hospital  
5 Research Ethics Committee.  
6  
7  
8  
9

10  
11  
12  
13  
14 This project is investigating the **hospital environment** to see how this  
15 **influences** patient **communication activity**. Communication activity  
16 involves communication, such as **talking** with other patients,  
17 **socialising**, **reading** the paper, using the **telephone**, talking to staff, or  
18 engaging in group activities including **therapy**.  
19  
20  
21  
22  
23  
24

25  
26  
27 **You** have been **selected** to participate as you have had a **stroke** and  
28 are receiving **treatment at Hollywood Private Hospital**. We are  
29 **interested** in seeing **how** the hospital **surroundings affect what you**  
30 **do** throughout the day.  
31  
32  
33  
34  
35

### 36 37 **What would you have to do?**

38  
39  
40 You will be **asked** to provide **consent** to **agree to participate** in the  
41 study.  
42  
43  
44

45 You will be **asked to consent** to:  
46  
47  
48  
49

- 50  
51 • Complete **three tests** to see how your stroke has affected **you**  
52 including your **language, concentration** and **memory**. These tests  
53 will be conducted at the **beginning of the project**. The tests will take  
54 approximately **1 hour** to complete with an option to complete the tests  
55  
56  
57  
58  
59  
60

1 over **two separate 30 minute sessions** and with as many **breaks** as  
2 you may need.  
3  
4  
5  
6

- 7  
8 • A **researcher** spending approximately **1 hour discussing with you**  
9 your **opinion** regarding **how** your rehabilitation **surroundings affect**  
10 **your stay in hospital** and **your communication activity** levels.  
11  
12  
13  
14  
15  
16 • A researcher **video recording, observing** and **writing down** what is  
17 happening in your **environment** including **your activities**. You will be  
18 observed and recorded for a total of **12 hours** over **3 days**.  
19  
20  
21  
22  
23  
24  
25

26 You may **not want** to be **video recorded**. If you **request**, you will  
27 **not be video recorded**. You can ask not to be video recorded at **any**  
28 **time**. In this case the researcher will **only observe, audio record**  
29 and **write down** what is **happening in your** environment **including**  
30 your activities.  
31  
32  
33  
34  
35  
36  
37  
38  
39

- 40 • A researcher **looking at your hospital medical file** to collect  
41 **information** regarding:  
42  
43 • Your **details** (such as your age, your living arrangements, your  
44 occupation and your level of functioning before your stroke)  
45  
46 • Any **conditions** or **diseases** you may have  
47  
48 • Information about your **stroke** (for example when it happened, the  
49 **area** of the **brain** affected, how it has **affected your functioning**  
50 and **abilities**)  
51  
52 • Details about **how long** you have **been in hospital** since your  
53 stroke  
54  
55  
56  
57  
58  
59  
60

1  
2  
3 If you decide to participate in this study, you **will not miss out** on any  
4 **treatment**. Participation will **not cost** you **anything** and **after**  
5  
6  
7 completing the **tests** and the **interview** you will be asked to continue  
8  
9 participating in your **normal activities**.  
10

11  
12  
13  
14  
15 We will **not record** if you are **behind closed curtains** or completing  
16  
17 sensitive tasks such as when you are in the **toilet** or **shower**.  
18  
19

20  
21  
22  
23 We may use the **recordings** of **you** to make a **training package**  
24  
25 (including a video). You can have **your face blurred out** if you want. If  
26  
27 you **do not want** to be in the training package we will **not include you**  
28  
29 in the training package or video.  
30

31  
32  
33  
34  
35 Your hospital **discharge** will **not be affected** because you are in this  
36  
37 study. **You** will be **discharged** from hospital when the hospital **medical**  
38  
39 **team decides** that you are **ready**.  
40

41  
42  
43  
44 There are **no known risks** of participating in this study. If you feel  
45  
46 uncomfortable at any time, you are free to **tell the researcher** and  
47  
48 **observations** within your room will **stop immediately**. You may  
49  
50 become **upset** during the **tests** or the **interview**. If this happens you  
51  
52 can **ask** to take a **break or stop** the interview.  
53  
54

55  
56  
57 There will be **no immediate benefit** to you from participating in this  
58  
59 research; however your participation will allow the collection of  
60

1 information that may **help improve** stroke **hospital wards** which may  
2 **benefit** future stroke survivors.  
3  
4  
5

6 **Participating** in this study is completely **voluntary**. You **do not have**  
7 **to** participate if you don't want to. If you decide to participate you may  
8 **withdraw** at **any time** without giving a reason and withdrawing **will not**  
9 **disadvantage** you in any way and will **not affect** your hospital  
10 **treatment**. If you **decide** that you do **not want to participate** in the  
11 study, you **can ask to remove** all of your **information** from the study.  
12  
13  
14  
15  
16  
17  
18  
19  
20  
21

22 All the **information** you give will be **confidential**. You will **not be**  
23 **identified** by name. You will be **assigned** a unique **code** and any  
24 information that may reveal your **identity** will be **removed**.  
25  
26  
27  
28

29 All personal health information will be accessed, used and stored in  
30 accordance with Commonwealth Privacy Laws. **Information** from all the  
31 people in the study is **combined** and **summarised**.  
32  
33  
34  
35  
36  
37  
38

39 We will **store** all your electronic **information** on a **password locked**  
40 **computer** and **password locked hard drive only accessible by the**  
41 **Chief Investigator**. Your hard copy information will be **kept** in a **locked**  
42 **cabinet** at Edith Cowan University. Your information will **only** be  
43 **accessible to researchers** named on **this study**.  
44  
45  
46  
47  
48  
49  
50  
51  
52

53 The **results** of this study may be **published** in research **journals** or  
54 presented at **conferences**. Your **name** will **not** be **used**.  
55  
56  
57  
58  
59  
60

1 **Data** may be **used** in higher degree by **research studies** in the **future**.  
2 **Confidentiality** will be **maintained** and no identifying information will  
3 be used.  
4  
5  
6  
7  
8  
9

10 **Data** will be **accessible by researchers** through data sharing archives.  
11 This data will be governed by an overarching body to ensure data is **only**  
12 **used for approved research** purposes. Researchers who access this  
13 data from the data bank will not have access to participant information  
14 and therefore **will not know your identity**.  
15  
16  
17  
18  
19  
20  
21  
22  
23

24 **Read** this information and be sure you **understand** its content **before**  
25 you **agree** to participate in this study.  
26  
27  
28  
29  
30  
31

32 If **you** would **like** to **participate** in this study, please **sign the form**  
33 below and **return** it to a **staff** member or a member of the **research**  
34 **team**.  
35  
36  
37  
38  
39  
40

### 41 **Questions or further information?**

42 You **may wish** to **discuss** this information with your **doctor, a relative**  
43 **or friend before agreeing** to take part in this study.  
44  
45  
46  
47  
48  
49

50 If you are interested in participating, please tell the researchers. If you  
51 have any questions or require any further information about the research  
52 project, please contact: Sarah D'Souza [Ph: 0439 982 451].  
53  
54  
55  
56  
57  
58  
59  
60

1 Thank you for considering the invitation to take part in this research  
2 project.  
3  
4  
5  
6

7 Yours sincerely,  
8  
9

10  
11  
12  
13 Sarah D'Souza  
14  
15  
16  
17

18 If you have any **concerns or complaints** about the research project and wish to **talk to an**  
19 **independent person**, you may contact:  
20  
21

22 **Kim Gifkins**  
23

24 **Senior Research Ethics Advisor**  
25

26 Edith Cowan University  
27

28 270 Joondalup Drive  
29

30 JOONDALUP WA 6027  
31

32 Phone: **(08) 6304 2170**  
33

34 Email: [research.ethics@ecu.edu.au](mailto:research.ethics@ecu.edu.au)  
35  
36  
37  
38  
39  
40

41 This project has been approved by the ECU Human Research Ethics Committee and the  
42 Hollywood Private Hospital Research Ethics Committee.  
43  
44  
45  
46  
47  
48  
49  
50  
51  
52  
53  
54  
55  
56  
57  
58  
59  
60

1 **You** have been **asked to participate** in a **research** study.  
2  
3  
4  
5



30 A researcher will **record you** with a **tape recorder** or a video **camera**,  
31 **watch** and **write down** what is happening in your **environment**  
32 including **your activities**.  
33  
34  
35  
36  
37  
38  
39  
40  
41  
42  
43  
44  
45  
46  
47





1 A **researcher** will **discuss** with you **your opinion** regarding **how** your  
2 hospital **surroundings** affect **your stay in hospital** and **your**  
3 **communication activity levels**.  
4  
5  
6  
7  
8  
9



10  
11  
12  
13  
14  
15  
16  
17  
18  
19  
20  
21  
22  
23  
24  
25  
26  
27  
28  
29  
30  
31  
32  
33  
34  
35  
36  
37  
38  
39  
40 Your **name** and **personal details** will be kept **private**.  
41  
42  
43  
44  
45  
46  
47  
48  
49  
50  
51  
52  
53  
54  
55  
56  
57  
58  
59  
60



1  
2  
3 You can **say no at any time.**  
4  
5  
6  
7



33 We may use the **recordings** of **you** to make a **training package**  
34 (including a video).  
35  
36  
37  
38  
39  
40  
41  
42  
43  
44  
45  
46  
47  
48  
49  
50  
51  
52  
53  
54  
55  
56  
57  
58  
59  
60



1 You can have **your face blurred out** if you want.  
2  
3  
4  
5



18 If you **do not want** to be in the training package we will **not include**  
19 **you** in the training package or video.  
20  
21  
22



40 I **agree to take part** in the above research project and give my **consent**  
41 **freely**.  
42  
43  
44  
45  
46  
47  
48  
49  
50  
51  
52  
53  
54  
55  
56  
57  
58  
59  
60



I have been **given a copy** of the **Information Statement** and I understand that the **project** will be **carried out** as **explained**.



I understand and agree to:

- Complete **three tests** to assess how the stroke has affected **me**, my **language, concentration** and **memory**, at the **beginning of the project**.



- A **researcher** spending approximately **1 hour discussing** with me my opinion regarding how my hospital **environment affects** my stay in hospital and **what I do**.

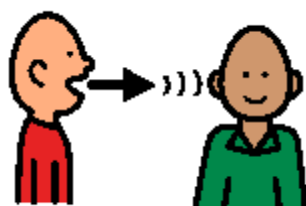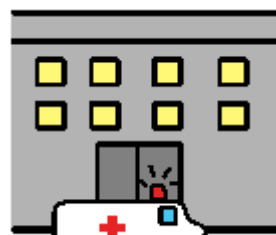

- 1  
2  
3  
4  
5  
6 • A researcher **video recording, observing** and **writing down** what is  
7 happening in my **environment** including **my activities**.  
8  
9  
10  
11  
12



- 13  
14  
15  
16  
17  
18  
19  
20  
21  
22  
23  
24  
25  
26 • A researcher **looking at my hospital medical file** to collect  
27 **information** for the study.  
28  
29  
30



31  
32  
33  
34  
35  
36  
37  
38  
39  
40  
41  
42  
43 I **understand** that **my identity, personal information** and **data** will  
44 remain **confidential**.  
45  
46  
47  
48  
49  
50



1  
2  
3 I have had the **opportunity** to **ask questions** about the study and am  
4  
5 **satisfied** with the **responses** that have been provided.  
6  
7  
8  
9  
10  
11

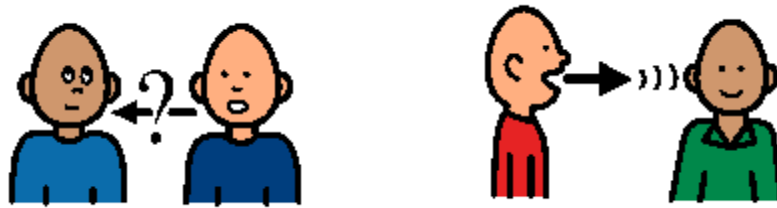

12  
13  
14  
15  
16  
17  
18  
19  
20  
21  
22  
23  
24  
25  
26  
27  
28  
29  
30  
31  
32  
33  
34  
35  
36  
37  
38  
39  
40  
41  
42  
43  
44  
45  
46  
47  
48  
49  
50  
51  
52  
53  
54  
55  
56  
57  
58  
59  
60

or peer review only

**Would you like to be involved?**

**Yes**

**No**

**I agree to the recordings of me to make a training package (including a video).**

**Yes**

**No**

**I would like my face blurred out.**

**Yes**

**No**

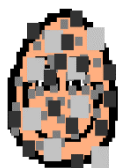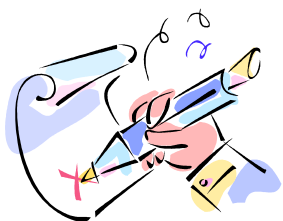

**Your Signature**

**Signature:** \_\_\_\_\_

**Print name:** \_\_\_\_\_

**Date:** \_\_\_\_\_

**Witness**

**Signature:** \_\_\_\_\_

**Print name:** \_\_\_\_\_

**Date:** \_\_\_\_\_

For peer review only

**Person responsible information sheet**  
**Patient communication activity in hospital after stroke**

This research project is being undertaken as part of the requirements of a PhD at Edith Cowan University.

Researchers' contact details

| Edith Cowan University                                                               |                                         |                  |
|--------------------------------------------------------------------------------------|-----------------------------------------|------------------|
| Chief Investigator/<br>PhD student                                                   | Sarah D'Souza                           | Ph: 0439 982 451 |
| Principal Supervisor                                                                 | Professor Beth Armstrong                | Ph: 08 6304 2769 |
| Co-Supervisor                                                                        | Associate Professor Natalie<br>Ciccione | Ph: 08 6304 2047 |
| Co-Supervisor                                                                        | Associate Professor Erin<br>Godecke     | Ph: 08 6304 5901 |
| Co-Supervisor                                                                        | Associate Professor Deborah<br>Hersh    | Ph: 08 6304 2563 |
| Hunter Stroke Service, University of Newcastle and Hunter Medical Research Institute |                                         |                  |
| Adjunct Supervisor                                                                   | Dr Heidi Janssen                        | Ph: 02 40420417  |

The participant is invited to take part in a research project. Sarah D'Souza, a Speech Pathologist and PhD student, is leading the study as Chief Investigator. This study has received ethical approval from ECU Human Research Ethics Committee and Hollywood Private Hospital Research Ethics Committee.

This project is investigating the hospital environment to see how this influences patient activity.

The participant has been selected to take part in this study as they have had a stroke and are receiving treatment at Hollywood Private Hospital. We are interested in



1 seeing how the hospital surroundings affect their communication activity throughout  
2 the day. Communication activity involves communication, such as talking with other  
3 patients, socialising, reading the paper, using the telephone, talking to staff, or  
4 engaging group activities including therapy.  
5  
6  
7  
8

9 This information sheet will explain the research project and will detail what is involved in the  
10 study. You will be given a copy of this information to keep for your reference.  
11  
12  
13  
14

15 Please read through all of the information carefully. You can ask the researcher questions  
16 about the study at any time.  
17  
18  
19  
20  
21

## 22 **Purpose of the research**

23  
24 Little is known about the impact of the hospital rehabilitation environment on patient  
25 communication activity levels during stroke recovery. This study will investigate how the  
26 hospital stroke ward environment influences patient communication activity levels. The  
27 information gathered from this study will assist in improving the Hollywood Private Hospital  
28 stroke ward environment to help the recovery of stroke survivors in the future.  
29  
30  
31  
32  
33  
34  
35

## 36 **What does the patient have to do?**

- 37  
38  
39  
40 • Complete three tests and a recording of them talking to see how their stroke has  
41 affected their functioning including their language, concentration and memory. These  
42 tests will be conducted at the beginning of the project. The tests will take  
43 approximately 1 hour to complete with an option to complete the tests over two  
44 separate 30 minute sessions and with as many breaks as the participant needs.  
45  
46  
47  
48  
49
- 50  
51 • Spend approximately 1 hour discussing with the researcher their opinion regarding how  
52 their rehabilitation surroundings affect their stay in hospital and activity levels.  
53  
54  
55
- 56  
57 • Allow the researcher to video record, observe and write down what is happening in the  
58 participant's environment including their activities for a total of 12 hours over a 3 day  
59 period. Video recording is a useful way of capturing the details of everyday activities on  
60

1 the ward. Often, people forget that the camera is there. Obviously, personal or private  
2 activity such as toileting would not be filmed. The participant may not want to be video  
3 recorded. If they request, they will not be video recorded. In this case the researcher  
4 will only observe, audio record and write down what is happening in their environment  
5 including their activities.  
6  
7  
8  
9

- 10
- 11 • A researcher will look at the participant's hospital medical file to collect information  
12 regarding:  
13
    - 14 • The participant's details (such as their age, living arrangements, occupation and  
15 level of functioning before stroke)
    - 16 • Any relevant conditions or diseases the participant may have
    - 17 • Information about the participant's stroke (for example when it happened, the  
18 area of the brain affected, how it has affected their functioning and abilities)
    - 19 • Details about how long the participant has been in hospital since their stroke
- 20  
21  
22  
23  
24  
25

26 The participant will not miss out on any treatment. Participation will not cost anything. After  
27 completing the tests and the interview the participant will be asked to continue their normal  
28 activities.  
29  
30  
31  
32

33 The participant's hospital discharge will not be affected because they are in this study. The  
34 participant will be discharged from hospital when the hospital medical team decides that they  
35 are ready.  
36  
37  
38  
39  
40  
41

42 There are no known risks of participating in this study. If the participant feels uncomfortable  
43 at any time, you or the participant are free to tell the researcher and observations within  
44 their room will stop immediately. The participant may become upset during the tests or the  
45 interview. If this happens you or the participant can ask to take a break or stop the interview.  
46  
47  
48  
49  
50  
51

52 There will be no immediate benefit to you or the participant from taking part in this research;  
53 however **their participation will allow the collection of information that may help**  
54 **improve stroke hospital wards which may benefit future stroke survivors.**  
55  
56  
57  
58  
59  
60

1 Participating in this study is completely voluntary. The participant can withdraw from taking  
2 part in the study at any time without giving a reason for withdrawing.  
3  
4  
5

6 The participant can request access to their research data at any time. They can request any  
7 of the information collected to be amended or removed if it is incorrect or they disagree with  
8 it. Please contact Sarah D'Souza (phone: 0439 982 451) if you would like to discuss  
9 accessing the participant's information.  
10  
11  
12  
13  
14  
15

16 The video, audio and written data will be identified by code. The information you provide will  
17 remain completely confidential. There will be no identifying information attached to the data  
18 and any information that may reveal the participant's identity will be removed. A list of  
19 participant names and codes will be kept in a locked filing cabinet at Hollywood Private  
20 Hospital and will only be accessible by the research team. All personal health information will  
21 be accessed, used and stored in accordance with Commonwealth Privacy Laws. The data will  
22 be stored on a password controlled computer or in a locked cabinet at Edith Cowan  
23 University. Electronic data will be backed-up on a password controlled hard drive only  
24 accessible by the Chief Investigator. Data will be stored for a maximum of 15 years after  
25 completion of the study. Video and audio recordings will then be permanently deleted and  
26 hard copy data will be shredded.  
27  
28  
29  
30  
31  
32  
33  
34  
35  
36  
37

38 Non-identifiable data will be accessible by researchers through data sharing archives. This  
39 data will be governed by an overarching body to ensure data is only used for approved  
40 research purposes. Researchers who access this data from the data bank will not have access  
41 to participant information therefore data will not be re-identifiable.  
42  
43  
44  
45  
46

47 The results of this study may be published in research journals or presented at conferences.  
48 The results will not include any information that may identify participants. Data may be used  
49 in higher degree by research studies in the future. In this circumstance, confidentiality will be  
50 maintained and no identifying information will be used.  
51  
52  
53  
54  
55  
56

57 Data collected from this study (including videos) may be used to develop training packages to  
58 improve future stroke survivors' communication activity levels in the future. We can blur out  
59  
60

1 the participant's face if they want. If they do not want to be in the training package we will  
2 not include them in the training package.  
3  
4  
5

6 At the end of the research project a summary of the results will be provided to you and the  
7 participant.  
8  
9

10  
11  
12  
13  
14  
15  
16  
17 If you have any questions or require any further information about the research project,  
18 please contact: Sarah D'Souza [Ph: 0439 982 451].  
19  
20  
21  
22  
23  
24  
25

26 Yours sincerely,  
27  
28  
29  
30  
31  
32

33 Sarah D'Souza  
34

35 If you have any concerns or complaints about the research project and wish to talk to an  
36 independent person, you may contact:  
37  
38

39 Kim Gifkins  
40

41 Senior Research Ethics Advisor  
42

43 Edith Cowan University  
44

45 270 Joondalup Drive  
46

47 JOONDALUP WA 6027  
48

49 Phone: (08) 6304 2170  
50

51 Email: [research.ethics@ecu.edu.au](mailto:research.ethics@ecu.edu.au)  
52  
53  
54  
55  
56  
57

58 This project has been approved by the ECU Human Research Ethics Committee and the  
59 Hollywood Private Hospital Research Ethics Committee.  
60

## Visitors and communication partners information and consent form

### Investigating Enhanced Environments after stroke

This research project is being undertaken as part of the requirements of a PhD at Edith Cowan University.

#### Researchers' contact details

| <b>Edith Cowan University</b>                                                               |                                     |                  |
|---------------------------------------------------------------------------------------------|-------------------------------------|------------------|
| Chief Investigator/<br>PhD student                                                          | Sarah D'Souza                       | Ph: 0439 982 451 |
| Principal Supervisor                                                                        | Professor Beth Armstrong            | Ph: 08 6304 2769 |
| Co-Supervisor                                                                               | Associate Professor Natalie Ciccone | Ph: 08 6304 2047 |
| Co-Supervisor                                                                               | Associate Professor Erin Godecke    | Ph: 08 6304 5901 |
| Co-Supervisor                                                                               | Associate Professor Deborah Hersh   | Ph: 08 6304 2563 |
| <b>Hunter Stroke Service, University of Newcastle and Hunter Medical Research Institute</b> |                                     |                  |
| Adjunct Supervisor                                                                          | Dr Heidi Janssen                    | Ph: 02 40420417  |

#### Description of the research project

This study is exploring patient's experiences following stroke in regards to the environment of an in-patient stroke rehabilitation unit. We want to explore patients' communication activity, which includes activities such as talking with other patients and visitors, socialising, reading the paper, using the telephone, talking to staff, or engaging group activities including therapy.

The participant has agreed to take part in this study. They have agreed to be video recorded for a total of 12 hours over a three day period.

Your interactions with the patient will be video recorded and manually recorded by the chief investigator to explore patient communication activity levels. You can choose to be observed by the researcher only if you do not want to be video recorded. You do not need to do anything other than complete your usual tasks and activities. We will not record if you are having sensitive conversations with the participant, if they are behind closed curtains or completing sensitive tasks such as toileting or showering.

1 We may use the recordings of you to make a training package (including a video). You can have your face  
2 blurred if you want. If you do not want to be in the training package we will not include you in the training  
3 package.  
4

5  
6  
7  
8 There will be no cost to you associated with the investigation. Participation is completely voluntary. You do  
9 not have to participate if you don't want to. If you decide to participate you may withdraw at any time  
10 without giving a reason and withdrawing will not disadvantage you or the participant in any way.  
11  
12  
13

14  
15 You may also benefit from the knowledge that you are helping future stroke survivors. It is possible that you  
16 may not benefit from participating in this study. There are no known risks associated with participating in  
17 this study.  
18  
19  
20  
21  
22

### 23 **Confidentiality of information**

24  
25 The video, audio and written data will be identified by code. There will be no identifying information  
26 attached to the data and any information that may reveal your identity will be removed. A list of participant  
27 names and codes will be kept in a locked filing cabinet at Hollywood Private Hospital and will only be  
28 accessible by the research team. All data will be accessed, used and stored in accordance with  
29 Commonwealth Privacy Laws. The data will be stored on a password controlled computer or in a locked  
30 cabinet at Edith Cowan University. Electronic data will be backed-up on password controlled hard drive only  
31 accessible by the Chief Investigator. Data will be stored for a maximum of 15 years after completion of the  
32 study. Video and audio recordings will then be permanently deleted and hard copy data will be shredded.  
33  
34  
35  
36  
37  
38  
39  
40

41 Non-identifiable data will be accessible by researchers through data sharing archives. This data will be  
42 governed by an overarching body to ensure data is only used for approved research purposes.

43 Researchers who access this data from the data bank will not have access to participant information  
44 therefore data will not be re-identifiable.  
45  
46  
47  
48  
49

50 The results of this study may be published in research journals or presented at conferences. The results  
51 will not include any information that may identify participants. Data may be used in higher degree by  
52 research studies in the future. In this circumstance, confidentiality will be maintained and no identifying  
53 information will be used.  
54  
55  
56  
57  
58

59 Please read this Information Statement and be sure you understand its content before you consent to take  
60 part.

1  
2 If you would like to take part, please complete the consent form and return it to Sarah D'Souza or a  
3 member of the research team.  
4  
5  
6  
7

8 ***Questions or further information?***

9 If you have any questions or require any further information about the research project, please contact:  
10 Sarah D'Souza [Ph: 0439 982 451]  
11  
12  
13  
14

15 Thank you for considering the invitation to take part in this research project.  
16  
17

18  
19 Yours sincerely,  
20  
21  
22

23  
24 Sarah D'Souza  
25  
26  
27

28 If you have any concerns or complaints about the research project and wish to talk to an independent  
29 person, you may contact: Kim Gifkins  
30  
31

32 Research Ethics Officer  
33  
34

35 Edith Cowan University  
36  
37

38 270 Joondalup Drive  
39

40 JOONDALUP WA 6027  
41

42 Phone: (08) 6304 2170  
43

44 Email: [research.ethics@ecu.edu.au](mailto:research.ethics@ecu.edu.au)  
45  
46  
47

48 This project has been approved by the ECU Human Research Ethics Committee and the Hollywood Private  
49 Hospital Research Ethics Committee.  
50  
51  
52  
53  
54  
55  
56  
57  
58  
59  
60

1 I \_\_\_\_\_ (print name), give my consent freely and  
2 agree to participate in observations of my interactions with the participant.

3 **Yes**      **No**      (please circle)  
4  
5

6 I agree to the researcher video recording my interactions with the participant

7  
8 **Yes**      **No**      (please circle)  
9

10  
11 I agree to be included in a training package (including a video).

12  
13 **Yes**      **No**      (please circle)  
14  
15

16 If I am included in the video training package I would like my face blurred out.

17  
18 **Yes**      **No**      (please circle)  
19

20  
21 I understand the project will be conducted as stated in the information letter, a copy of which I have  
22 retained.  
23

24  
25 I understand I can withdraw from the project at any time and do not have to give a reason for withdrawing.  
26  
27

28 I understand personal information will remain confidential to the researchers.  
29

30  
31 I have been given the opportunity to raise any questions or concerns I have and am satisfied with the  
32 responses I was given.  
33  
34  
35

36 **Participant**

37  
38 **Print name:** \_\_\_\_\_  
39

40 **Signature:** \_\_\_\_\_  
41

42 **Phone number:** \_\_\_\_\_  
43

44 **Email address:** \_\_\_\_\_  
45

46 **Date:** \_\_\_\_\_  
47

48 **Witness**

49 **Print name:** \_\_\_\_\_  
50

51 **Signature:** \_\_\_\_\_  
52

53 **Date:** \_\_\_\_\_  
54  
55  
56  
57  
58  
59  
60



## Staff information and consent form

### Investigating Enriched Environments after stroke

This research project is being undertaken as part of the requirements of a PhD at Edith Cowan University.

#### Researchers' contact details

| Edith Cowan University                                                               |                                     |                  |
|--------------------------------------------------------------------------------------|-------------------------------------|------------------|
| Chief Investigator/<br>PhD student                                                   | Sarah D'Souza                       | Ph: 0439 982 451 |
| Principal Supervisor                                                                 | Professor Beth Armstrong            | Ph: 08 6304 2769 |
| Co-Supervisor                                                                        | Associate Professor Natalie Ciccone | Ph: 08 6304 2047 |
| Co-Supervisor                                                                        | Associate Professor Erin Godecke    | Ph: 08 6304 5901 |
| Co-Supervisor                                                                        | Associate Professor Deborah Hersh   | Ph: 08 6304 2563 |
| Hunter Stroke Service, University of Newcastle and Hunter Medical Research Institute |                                     |                  |
| Adjunct Supervisor                                                                   | Dr Heidi Janssen                    | Ph: 02 40420417  |

#### Description of the research project

This study is exploring staff and patient's experiences in regards to the environment of the Edwards and Woods wards at Hollywood Private Hospital. We want to explore patient communication activity, which includes activities such as talking with other patients, socialising, reading the paper, using the telephone, talking to staff, or engaging group activities including therapy. We would like to explore staffs' perceptions of barriers and facilitators to communication activity on the wards and address these in order to enhance the ward environment.

Staff have been selected to participate in order to gain a range of perspectives in regards to the day to day operations, procedures, policies and interactions that influence the environment of the Edwards and Woods wards. A training program for staff will be designed to address barriers and facilitators identified on the wards.

There are two components of this research study that involve staff. You may wish to consent to participate in one or both parts of this study.

1  
2  
3 **Part 1:** Patients will be video recorded for a total of 12 hours over a three day period. Your interactions with  
4 the patient will be video recorded and manually recorded by a member of the research team to explore  
5 patient communication activity levels. You can choose to be observed by the researcher only if you do not  
6 want to be video recorded. You do not need to do anything other than complete your usual daily tasks and  
7 activities. We will not record if you are behind closed curtains or completing sensitive tasks such as toileting  
8 or showering the patient.  
9  
10  
11  
12  
13  
14

15 We may want use the recordings of you to make a training package (including a video). We will show you  
16 the video we want to use and explain exactly how this will be used before we do anything. You can have  
17 your face blurred out if you want. If you don't want to be included in the training package we will not include  
18 any videos of you in the training package.  
19  
20  
21  
22  
23

24 **Part 2:** You will be asked to take part in the following:  
25

- 26 • A focus group with the researcher and your co-workers for approximately 1 hour to explore your  
27 perceptions of environmental barriers and facilitators to activity.
- 28 • Attend a training program for approximately 1.5 hours. This will focus on training staff to promote  
29 patient communication on the ward. This session will be located at Hollywood Private Hospital and  
30 will be offered over several dates to facilitate your ability to attend. If you are unable to attend the  
31 training program we may provide training and video resources to facilitate your participation in  
32 training.
- 33 • Complete an anonymous short questionnaire before and after attending the training program to gain  
34 feedback on training and explore your perception of changes in your knowledge, skills and attitudes  
35 towards communication and aphasia.
- 36 • A final focus group with the researcher for approximately 1 hour to again explore your perceptions  
37 of environmental barriers and facilitators to activity.

38 The focus groups will be tape recorded however at any stage you may ask for the tape to stopped,  
39 edited or have your comments erased.  
40  
41  
42  
43  
44  
45  
46  
47  
48  
49  
50

51 There will be no cost to you associated with the investigation. Participation is completely voluntary. You do  
52 not have to participate if you don't want to. If you decide to participate you may withdraw at any time  
53 without giving a reason and withdrawing will not disadvantage you in any way.  
54  
55  
56  
57  
58

59 You may benefit from gaining knowledge and skills regarding communication from attending the training  
60 program. Additionally, you may also benefit from the knowledge that you are helping future stroke

1 survivors. It is possible that you may not benefit from participating in this study. There are no known risks  
2 associated with participating in this study.  
3  
4  
5

## 6 **Confidentiality of information** 7

8 The information you provide during the interviews will be audio recorded by the Chief Investigator. Your  
9 perspectives and opinions will be analysed and grouped into common 'themes' and 'stories'. This will be  
10 used to inform the development and review of the training program.  
11  
12  
13

14  
15  
16 The video, audio and written data will be identified by code. The information you provide will remain  
17 completely confidential. There will be no identifying information attached to the data and any information  
18 that may reveal your identity will be removed. A list of participant names and codes will be kept in a locked  
19 filing cabinet at Hollywood Private Hospital and will only be accessible by the research team. All data will be  
20 accessed, used and stored in accordance with Commonwealth Privacy Laws. The data will be stored on a  
21 password controlled computer or in a locked cabinet at Edith Cowan University. Electronic data will be  
22 backed-up on a password controlled hard drive only accessible by the Chief Investigator. Data will be  
23 stored for a maximum of 15 years after completion of the study. Video and audio recordings will then be  
24 permanently deleted and hard copy data will be shredded.  
25  
26  
27  
28  
29  
30  
31  
32

33 Non-identifiable data will be accessible by researchers through data sharing archives. This data will be  
34 governed by an overarching body to ensure data is only used for approved research purposes.  
35 Researchers who access this data from the data bank will not have access to participant information  
36 therefore data will not be re-identifiable.  
37  
38  
39  
40  
41  
42

43 The results of this study may be published in research journals or presented at conferences. The results  
44 will not include any information that may identify participants. Data may be used in higher degree by  
45 research studies in the future. In this circumstance, confidentiality will be maintained and no identifying  
46 information will be used.  
47  
48  
49  
50  
51

52 A summary of the results will be provided through Hollywood Private Hospital 18 months after the  
53 completion of the study.  
54  
55  
56  
57

58 Please read this Information Statement and be sure you understand its content before you consent to take  
59 part.  
60

1  
2 If you would like to take part, please complete the consent form and return it to Sarah D'Souza, Claire  
3 Tucak or a member of the research team.  
4  
5  
6  
7

8 **Questions or further information?**

9 You may wish to consult with your manager before agreeing to take part in this study.  
10  
11  
12  
13

14 If you have any questions or require any further information about the research project, please contact:  
15 Sarah D'Souza [Ph: 0439 982 451]  
16  
17  
18  
19

20 Thank you for considering the invitation to take part in this research project.  
21  
22  
23

24 Yours sincerely,  
25  
26  
27  
28  
29  
30

31 Sarah D'Souza  
32  
33  
34

35 If you have any concerns or complaints about the research project and wish to talk to an independent  
36 person, you may contact: Kim Gifkins  
37  
38

39 Research Ethics Officer  
40

41 Edith Cowan University  
42

43 270 Joondalup Drive  
44

45 JOONDALUP WA 6027  
46  
47

48 Phone: (08) 6304 2170  
49

50 Email: [research.ethics@ecu.edu.au](mailto:research.ethics@ecu.edu.au)  
51  
52  
53  
54

55 This project has been approved by the ECU Human Research Ethics Committee and the Hollywood Private  
56 Hospital Research Ethics Committee.  
57  
58  
59  
60

I \_\_\_\_\_ (print name), give my consent freely and agree to participate in (please circle):

**Part 1:**

Yes                      No                      **Observations** of your interactions with patients following stroke.

Yes                      No                      **Video recording** of your interactions with patients following stroke.

**Part 2:**

Yes                      No                      Complete two focus groups with the researcher, complete two short questionnaires and attend a training program.

I understand the project will be conducted as stated in the information letter, a copy of which I have retained.

I understand I can withdraw from the project at any time and do not have to give a reason for withdrawing.

I understand personal information will remain confidential to the researchers.

I have been given the opportunity to raise any questions or concerns I have and am satisfied with the responses I was given.

**Participant**

**Print name:** \_\_\_\_\_

**Signature:** \_\_\_\_\_

**Phone number:** \_\_\_\_\_

**Email address:** \_\_\_\_\_

**Date:** \_\_\_\_\_

**Witness**

**Print name:** \_\_\_\_\_

**Signature:** \_\_\_\_\_

**Date:** \_\_\_\_\_

**Volunteer information and consent form**  
**Investigating Enriched Environments after stroke**

This research project is being undertaken as part of the requirements of a PhD at Edith Cowan University.

**Researchers' contact details**

| <b>Edith Cowan University</b>                                                               |                                     |                  |
|---------------------------------------------------------------------------------------------|-------------------------------------|------------------|
| Chief Investigator/<br>PhD student                                                          | Sarah D'Souza                       | Ph: 0439 982 451 |
| Principal Supervisor                                                                        | Professor Beth Armstrong            | Ph: 08 6304 2769 |
| Co-Supervisor                                                                               | Associate Professor Natalie Ciccone | Ph: 08 6304 2047 |
| Co-Supervisor                                                                               | Associate Professor Erin Godecke    | Ph: 08 6304 5901 |
| Co-Supervisor                                                                               | Associate Professor Deborah Hersh   | Ph: 08 6304 2563 |
| <b>Hunter Stroke Service, University of Newcastle and Hunter Medical Research Institute</b> |                                     |                  |
| Adjunct Supervisor                                                                          | Dr Heidi Janssen                    | Ph: 02 40420417  |

**Description of the research project**

This study is a Communication Enhanced Environment (CEE) at Hollywood Private Hospital. A CEE involves several initiatives that aim to provide more opportunities for communication for stroke survivors on the ward. One of these initiatives involves the participation of volunteers.

**As a volunteer participant, you will be asked to take part in the following:**

- Attend a training program for approximately 1.5 hours. This will focus on training volunteers in communicating with patients following stroke with communication difficulties. This session will be located at Hollywood Private Hospital and will be offered over several dates to facilitate your ability to attend. If you are unable to attend the training program we may provide training and video resources to facilitate your participation in training.
- Complete an anonymous short questionnaire before and after attending the training program to obtain your feedback on the training session.

- A focus group with the researcher and other volunteers for approximately 1 hour to explore your perceptions of communicating with patients following stroke. The focus group will be tape recorded however at any stage you may ask for the tape to be stopped, edited or have your comments erased.
- Host a communal dining and lounge area once a week to offer tea and coffee and provide social companionship for patients following stroke.
- Your interactions with the patient may be video recorded and manually recorded by a member of the research team to explore patient communication activity levels. You can choose to be observed by the researcher only if you do not want to be video recorded. We will not record if you are having sensitive conversations with the patient/s.

There will be no cost to you associated with participating in this study. Participation is completely voluntary. You do not have to participate if you don't want to. If you decide to participate you may withdraw at any time without giving a reason and withdrawing will not disadvantage you in any way.

You may benefit from gaining knowledge and skills regarding communication from attending the training program. Additionally, you may also benefit from the knowledge that you are helping future stroke survivors. It is possible that you may not benefit from participating in this study. There are no known risks associated with participating in this study.

### **Confidentiality of information**

The information you provide during the interviews will be audio recorded by the Chief Investigator. Your perspectives and opinions will be analysed and grouped into common 'themes' and 'stories'.

The video, audio and written data will be identified by code. The information you provide will remain completely confidential. There will be no identifying information attached to the data and any information that may reveal your identity will be removed. A list of participant names and codes will be kept in a locked filing cabinet at Hollywood Private Hospital and will only be accessible by the research team. All data will be accessed, used and stored in accordance with Commonwealth Privacy Laws. The data will be stored on a password controlled computer or in a locked cabinet at Edith Cowan University. Electronic data will be backed-up on a password controlled hard drive only accessible by the Chief Investigator. Data will be stored for a maximum of 15 years after completion of the study. Video and audio recordings will then be permanently deleted and hard copy data will be shredded.

Non-identifiable data will be accessible by researchers through data sharing archives. This data will be governed by an overarching body to ensure data is only used for approved research purposes.

1 Researchers who access this data from the data bank will not have access to participant information  
2 therefore data will not be re-identifiable.  
3  
4  
5

6 The results of this study may be published in research journals or presented at conferences. The results  
7 will not include any information that may identify participants. Data may be used in higher degree by  
8 research studies in the future. In this circumstance, confidentiality will be maintained and no identifying  
9 information will be used.  
10  
11  
12  
13  
14

15 A summary of the results will be provided through Hollywood Private Hospital 18 months after the  
16 completion of the study.  
17  
18  
19  
20

21 Please read this Information Statement and be sure you understand its content before you consent to take  
22 part.  
23  
24  
25  
26

27 If you would like to take part, please complete the consent form and return it to Sarah D'Souza, Claire  
28 Tucak or a member of the research team.  
29  
30  
31  
32

### 33 **Questions or further information?** 34 35 36

37 If you have any questions or require any further information about the research project, please contact:  
38 Sarah D'Souza [Ph: 0439 982 451]  
39  
40  
41  
42

43 Thank you for considering the invitation to take part in this research project.  
44  
45  
46

47 Yours sincerely,  
48  
49  
50  
51  
52  
53

54 Sarah D'Souza  
55  
56  
57

58 If you have any concerns or complaints about the research project and wish to talk to an independent  
59 person, you may contact: Kim Gifkins  
60



1 Research Ethics Officer

2 Edith Cowan University

3  
4 270 Joondalup Drive

5  
6 JOONDALUP WA 6027

7  
8  
9 Phone: (08) 6304 2170

10  
11 Email: [research.ethics@ecu.edu.au](mailto:research.ethics@ecu.edu.au)

12  
13  
14  
15  
16 This project has been approved by the ECU Human Research Ethics Committee and the Hollywood Private  
17 Hospital Research Ethics Committee.  
18

19  
20  
21  
22  
23  
24  
25  
26  
27  
28  
29  
30  
31  
32  
33  
34  
35  
36  
37  
38  
39  
40  
41  
42  
43  
44  
45  
46  
47  
48  
49  
50  
51  
52  
53  
54  
55  
56  
57  
58  
59  
60

For peer review only

1 I \_\_\_\_\_ (print name), give my consent freely and  
2 agree to participate in (please circle) this study as described in this information and consent form.  
3  
4

5 I understand the project will be conducted as stated in the information letter, a copy of which I have  
6 retained.  
7  
8

9 I understand I can withdraw from the project at any time and do not have to give a reason for withdrawing.  
10  
11

12 I understand personal information will remain confidential to the researchers.  
13  
14

15 I have been given the opportunity to raise any questions or concerns I have and am satisfied with the  
16 responses I was given.  
17  
18  
19

20  
21 **Participant**

22 **Print name:** \_\_\_\_\_  
23

24 **Signature:** \_\_\_\_\_  
25

26 **Phone number:** \_\_\_\_\_  
27

28 **Email address:** \_\_\_\_\_  
29

30 **Date:** \_\_\_\_\_  
31

32 **Witness**

33 **Print name:** \_\_\_\_\_  
34

35 **Signature:** \_\_\_\_\_  
36

37 **Date:** \_\_\_\_\_  
38  
39  
40  
41  
42  
43  
44  
45  
46  
47  
48  
49  
50  
51  
52  
53  
54  
55  
56  
57  
58  
59  
60
