# Supplementary material for: Hospital staff, volunteers’ and patients’ perceptions of barriers and facilitators to communication following stroke in an acute and a rehabilitation private hospital ward: a qualitative description study
Source: PubMed Central journal article supplement — BMJ Open. 2021 May 5;11(5):e043897. doi: 10.1136/bmjopen-2020-043897 (PMC8103362; doi:10.1136/bmjopen-2020-043897), 2021-05-05
Supplement: bmjopen-2020-043897supp002.pdf [file bmjopen-2020-043897supp002.pdf]

**Appendix A.****Consolidated criteria for reporting qualitative studies (COREQ)<sup>9</sup>: 32-item checklist**

| No Item                                     | Guide questions/description                                                                                                               | Location within paper                                                   |
|---------------------------------------------|-------------------------------------------------------------------------------------------------------------------------------------------|-------------------------------------------------------------------------|
| Domain 1: Research team and reflexivity     |                                                                                                                                           |                                                                         |
| Personal Characteristics                    |                                                                                                                                           |                                                                         |
| 1. Interviewer/facilitator                  | Which author/s conducted the interview or focus group?                                                                                    | Page 10                                                                 |
| 2. Credentials                              | What were the researcher's credentials? E.g. PhD, MD                                                                                      | Page 10                                                                 |
| 3. Occupation                               | What was their occupation at the time of the study?                                                                                       | Page 10                                                                 |
| 4. Gender                                   | Was the researcher male or female?                                                                                                        | Page 10                                                                 |
| 5. Experience and training                  | What experience or training did the researcher have?                                                                                      | Page 10                                                                 |
| Relationship with participants              |                                                                                                                                           | Page 7                                                                  |
| 6. Relationship established                 | Was a relationship established prior to study commencement?                                                                               | Page 7                                                                  |
| 7. Participant knowledge of the interviewer | What did the participants know about the researcher? e.g. personal goals, reasons for doing the research                                  | Supplementary files, participant information and consent forms, page 10 |
| 8. Interviewer characteristics              | What characteristics were reported about the interviewer/facilitator? e.g. Bias, assumptions, reasons and interests in the research topic | Page 10                                                                 |
| Domain 2: study design                      |                                                                                                                                           |                                                                         |
| Theoretical framework                       |                                                                                                                                           |                                                                         |

|                                          |                                                                                                                                                          |                        |
|------------------------------------------|----------------------------------------------------------------------------------------------------------------------------------------------------------|------------------------|
| 9. Methodological orientation and Theory | What methodological orientation was stated to underpin the study? e.g. grounded theory, discourse analysis, ethnography, phenomenology, content analysis | Page 13                |
| Participant selection                    |                                                                                                                                                          |                        |
| 10. Sampling                             | How were participants selected? e.g. purposive, convenience, consecutive, snowball                                                                       | Page 8, 10             |
| 11. Method of approach                   | How were participants approached? e.g. face-to-face, telephone, mail, email                                                                              | Page 8, 10             |
| 12. Sample size                          | How many participants were in the study?                                                                                                                 | Page 8, 10             |
| 13. Non-participation                    | How many people refused to participate or dropped out? Reasons?                                                                                          | Figure 1, page 8       |
| 14. Setting                              | Setting of data collection Where was the data collected? e.g. home, clinic, workplace                                                                    | Page 7-8               |
| 15. Presence of non-participants         | Was anyone else present besides the participants and researchers?                                                                                        | Page 11                |
| 16. Description of sample                | What are the important characteristics of the sample? e.g. demographic data, date                                                                        | Table 2, page 12       |
| Data collection                          |                                                                                                                                                          |                        |
| 17. Interview guide                      | Were questions, prompts, guides provided by the authors? Was it pilot tested?                                                                            | Appendix B, Appendix C |
| 18. Repeat interviews                    | Were repeat interviews carried out? If yes, how many?                                                                                                    | NA                     |
| 19. Audio/visual recording               | Did the research use audio or visual recording to collect the data?                                                                                      | Page 10                |
| 20. Field notes                          | Were field notes made during and/or after the interview or focus group?                                                                                  | Page 10                |
| 21. Duration                             | What was the duration of the interviews or focus group?                                                                                                  | Page 11                |

|                                    |                                                                                                                                   |            |
|------------------------------------|-----------------------------------------------------------------------------------------------------------------------------------|------------|
| 22. Data saturation                | Was data saturation discussed?                                                                                                    | Page 5     |
| 23. Transcripts returned           | Were transcripts returned to participants for comment and/or correction?                                                          | No         |
| Domain 3: analysis and findings    |                                                                                                                                   |            |
| Data analysis                      |                                                                                                                                   |            |
| 24. Number of data coders          | How many data coders coded the data?                                                                                              | Page 13    |
| 25. Description of the coding tree | Did authors provide a description of the coding tree?                                                                             | Figure 2   |
| 26. Derivation of themes           | Were themes identified in advance or derived from the data?                                                                       | Page 13    |
| 27. Software                       | What software, if applicable, was used to manage the data?                                                                        | Page 13    |
| 28. Participant checking           | Did participants provide feedback on the findings?                                                                                | Page 13    |
| Reporting                          |                                                                                                                                   |            |
| 29. Quotations presented           | Were participant quotations presented to illustrate the themes / findings? Was each quotation identified? e.g. participant number | Page 14-20 |
| 30. Data and findings consistent   | Was there consistency between the data presented and the findings?                                                                | Page 14-20 |
| 31. Clarity of major themes        | Were major themes clearly presented in the findings?                                                                              | Figure 2   |
| 32. Clarity of minor themes        | Is there a description of diverse cases or discussion of minor themes?                                                            | Page 14-20 |
