# Supplementary material for: Hospital staff, volunteers’ and patients’ perceptions of barriers and facilitators to communication following stroke in an acute and a rehabilitation private hospital ward: a qualitative description study
Source: PubMed Central journal article supplement — BMJ Open. 2021 May 5;11(5):e043897. doi: 10.1136/bmjopen-2020-043897 (PMC8103362; doi:10.1136/bmjopen-2020-043897), 2021-05-05
Supplement: bmjopen-2020-043897supp003.pdf [file bmjopen-2020-043897supp003.pdf]

## Appendix B.

### **Investigating Communication Enhanced Environments after stroke: Staff focus group guide**

What kind of language activities or language tasks do patients following stroke currently participate in on the ward?

What kind of language activities or language tasks would you like see patients following stroke have access to on the wards?

Describe your experience of communicating with patients following stroke at the moment.

Can you tell me about anything that facilitates your ability to communicate with patients following stroke on the ward?

Can you tell me about any barriers you experience that impact your ability to communicate with patients following stroke on the ward?

What changes would you like to see to enhance communication between staff and patients following stroke on the ward?

What changes would you like to see to enhance communication between visitors and patients following stroke on the ward?

How could we enhance or optimise communication and language tasks and activities for patients following stroke on the ward?

What do you think a communication and language enhanced stroke ward environment might look like?
