# Supplementary material for: Hospital staff, volunteers’ and patients’ perceptions of barriers and facilitators to communication following stroke in an acute and a rehabilitation private hospital ward: a qualitative description study
Source: PubMed Central journal article supplement — BMJ Open. 2021 May 5;11(5):e043897. doi: 10.1136/bmjopen-2020-043897 (PMC8103362; doi:10.1136/bmjopen-2020-043897), 2021-05-05
Supplement: bmjopen-2020-043897supp004.pdf [file bmjopen-2020-043897supp004.pdf]

### Appendix C.

#### **Investigating Communication Enhanced Environments after stroke: Patient interview guide**

Tell me about what kind of activities you do while you are here (in hospital).

Describe your experience of communicating with people on the ward.

What makes it easier to communicate with people on the ward?

What makes it hard to communicate with people on the ward?

What can we do to make communicating with people easier?
